# Supplementary material for: Identification of Bioactive Compounds and Potential Mechanisms of Kuntai Capsule in the Treatment of Polycystic Ovary Syndrome by Integrating Network Pharmacology and Bioinformatics
Source: Hindawi journal article supplement (doi:10.1155/2022/3145938), 2022-01-01
Supplement: f1 [file 3145938.f1.pdf]

| Mol ID    | Hdon | Hacc | OB (%)       | Caco-2   | BBB      | DL      | FASA-  | HL         |
|-----------|------|------|--------------|----------|----------|---------|--------|------------|
| MOL000359 |      | 1    | 1 36.913906  | 1.32059  | 0.87298  | 0.7512  | 20.23  | 5.371091   |
| MOL000449 |      | 1    | 1 43.829852  | 1.44458  | 1.00045  | 0.75665 | 20.23  | 5.574595   |
| MOL000422 |      | 4    | 6 41.88225   | 0.26096  | -0.55335 | 0.24066 | 111.13 | 14.743371  |
| MOL000492 |      | 5    | 6 54.826434  | -0.03424 | -0.72733 | 0.24164 | 110.38 | 0.609577   |
| MOL001928 |      | 2    | 6 66.640769  | -0.48821 | -0.88431 | 0.32626 | 93.06  | 6.535831   |
| MOL001918 |      | 1    | 6 87.593121  | -0.09125 | -0.56103 | 0.36678 | 82.06  | 7.451754   |
| MOL001910 |      | 2    | 5 64.773893  | 0.08725  | -0.59468 | 0.37586 | 79.29  | 2.621835   |
| MOL001925 |      | 2    | 6 68.175762  | -0.3376  | -0.72612 | 0.39507 | 85.22  | 8.810559   |
| MOL001919 |      | 2    | 4 43.556202  | -0.00229 | -0.40565 | 0.53276 | 74.6   | 4.336052   |
| MOL001930 |      | 4    | 12 31.274473 | -0.68923 | -1.23618 | 0.74612 | 174.35 | -1.845084  |
| MOL000359 |      | 1    | 1 36.913906  | 1.32059  | 0.87298  | 0.7512  | 20.23  | 5.371091   |
| MOL000358 |      | 1    | 1 36.913906  | 1.32463  | 0.98588  | 0.75123 | 20.23  | 5.355491   |
| MOL000211 |      | 2    | 3 55.377073  | 0.73231  | 0.21532  | 0.7761  | 57.53  | 8.873708   |
| MOL001924 |      | 5    | 11 53.870375 | -1.47259 | -1.86121 | 0.78709 | 164.37 | 13.882664  |
| MOL001921 |      | 3    | 10 49.121317 | -1.13469 | -1.75511 | 0.79711 | 140.98 | 7.26361    |
| MOL000282 |      | 1    | 1 43.507086  | 1.32195  | 0.90967  | 0.71939 | 20.23  | 5.113073   |
| MOL000291 |      | 3    | 5 30.524601  | -0.07527 | -0.86893 | 0.7463  | 94.83  | 8.672073   |
| MOL000292 |      | 2    | 4 38.151358  | 0.31611  | -0.41341 | 0.74643 | 74.6   | 7.725726   |
| MOL000296 |      | 1    | 1 36.913906  | 1.31876  | 0.96428  | 0.75072 | 20.23  | 5.347511   |
| MOL000290 |      | 3    | 5 30.606946  | -0.1368  | -0.92991 | 0.76152 | 94.83  | 8.256824   |
| MOL000279 |      | 3    | 3 37.963828  | 0.27629  | -0.38974 | 0.77061 | 60.69  | 5.312703   |
| MOL000275 |      | 2    | 3 38.7115    | 0.51877  | -0.1423  | 0.80199 | 57.53  | 7.7791     |
| MOL000287 |      | 2    | 3 38.699914  | 0.6067   | -0.04064 | 0.8095  | 57.53  | 6.59447    |
| MOL000289 |      | 2    | 5 33.62792   | 0.10154  | -0.57273 | 0.81076 | 83.83  | 9.266582   |
| MOL000276 |      | 2    | 5 35.105891  | 0.02743  | -0.87172 | 0.81091 | 83.83  | 7.340838   |
| MOL000283 |      | 1    | 3 40.36268   | 0.84419  | 0.34096  | 0.81255 | 38.69  | 3.428952   |
| MOL000273 |      | 3    | 4 30.932142  | 0.01025  | -0.7579  | 0.81281 | 77.76  | 6.812918   |
| MOL000280 |      | 3    | 4 31.072057  | 0.05107  | -0.69764 | 0.81528 | 77.76  | 7.418508   |
| MOL000285 |      | 2    | 4 38.255158  | 0.11551  | -0.57069 | 0.82014 | 74.6   | 6.77014    |
| MOL000300 |      | 1    | 3 44.172299  | 0.38192  | -0.1611  | 0.83458 | 60.36  | 7.037371   |
| MOL000622 |      | 2    | 4 63.708884  | 0.02344  | -0.24386 | 0.18833 | 66.76  | 3.173804   |
| MOL008647 |      | 3    | 5 86.712159  | 0.54599  | -0.50741 | 0.26454 | 78.79  | 3.712293   |
| MOL000098 |      | 5    | 7 46.433348  | 0.04842  | -0.7689  | 0.27525 | 131.36 | 14.400548  |
| MOL000785 |      | 0    | 4 64.601113  | 1.3287   | 0.37072  | 0.64524 | 40.8   | 2.247782   |
| MOL000762 |      | 6    | 8 35.358188  | -0.38394 | -1.46802 | 0.65003 | 155.52 | 33.174943  |
| MOL002894 |      | 1    | 4 35.735511  | 1.06673  | 0.17408  | 0.7269  | 51.8   | 6.464688   |
| MOL013352 |      | 0    | 7 43.286254  | 0.00775  | -0.4298  | 0.76724 | 95.34  | -13.044428 |
| MOL002903 |      | 0    | 5 55.366873  | 1.03841  | 0.57189  | 0.77465 | 40.16  | 6.413736   |
| MOL002907 |      | 3    | 6 104.95424  | -0.911   | -1.31348 | 0.77599 | 104.06 | 6.68222    |
| MOL002897 |      | 0    | 4 43.092332  | 1.16601  | 0.39823  | 0.7761  | 40.8   | 6.098007   |
| MOL001454 |      | 0    | 4 36.861245  | 1.24179  | 0.56718  | 0.77665 | 40.8   | 6.565936   |
| MOL002904 |      | 0    | 6 36.680901  | 0.97215  | 0.17347  | 0.81596 | 58.92  | 7.331258   |
| MOL001458 |      | 0    | 4 30.671852  | 1.21396  | 0.32474  | 0.85647 | 40.8   | 9.333815   |
| MOL002668 |      | 0    | 4 45.833181  | 1.22152  | 0.24208  | 0.86552 | 40.8   | 8.407065   |
| MOL000228 |      | 1    | 4 55.233174  | 0.87197  | 0.26171  | 0.20163 | 55.76  | 17.023316  |
| MOL002913 |      | 3    | 5 40.037781  | 0.56056  | 0.18159  | 0.20722 | 86.99  | 16.127363  |
| MOL000525 |      | 3    | 5 39.403972  | 0.59738  | -0.17207 | 0.20723 | 90.9   | 16.925553  |
| MOL002714 |      | 3    | 5 33.518919  | 0.63086  | -0.05023 | 0.20888 | 90.9   | 16.249167  |
| MOL002911 |      | 4    | 6 69.039876  | -0.07223 | -0.32196 | 0.21994 | 107.22 | 21.890109  |
| MOL010415 |      | 0    | 2 39.275344  | 1.46201  | 1.241    | 0.2289  | 26.3   | 5.435461   |
| MOL000173 |      | 2    | 5 30.684567  | 0.78776  | 0.03762  | 0.22942 | 79.9   | 17.746871  |
| MOL002926 |      | 2    | 5 38.715066  | 0.71448  | 0.02549  | 0.22987 | 75.99  | 17.582155  |
| MOL002937 |      | 2    | 5 66.061739  | 0.67465  | 0.12743  | 0.23057 | 75.99  | 17.165104  |

|           |   |   |           |         |          |         |        |           |
|-----------|---|---|-----------|---------|----------|---------|--------|-----------|
| MOL002928 | 2 | 5 | 41.367569 | 0.76122 | 0.12657  | 0.23233 | 79.9   | 17.154856 |
| MOL001689 | 2 | 5 | 34.973573 | 0.67146 | -0.04689 | 0.24082 | 79.9   | 17.248472 |
| MOL000073 | 5 | 6 | 48.959841 | 0.01948 | -0.64284 | 0.24162 | 110.38 | 0.626389  |
| MOL002910 | 4 | 6 | 41.150963 | 0.16103 | -0.41926 | 0.24189 | 107.22 | 15.812348 |
| MOL002914 | 4 | 6 | 41.350427 | 0.04932 | -0.66394 | 0.2436  | 107.22 | 15.87634  |
| MOL002925 | 4 | 6 | 37.013487 | 0.17858 | -0.55682 | 0.24382 | 111.13 | 17.996386 |
| MOL008206 | 1 | 5 | 44.08796  | 1.00657 | 0.53598  | 0.25331 | 68.9   | 17.018812 |
| MOL012246 | 3 | 6 | 74.23522  | 0.37328 | -0.43273 | 0.26479 | 96.22  | 16.849629 |
| MOL002908 | 3 | 6 | 37.008374 | 0.75876 | -0.06693 | 0.26546 | 100.13 | 16.169995 |
| MOL002933 | 3 | 6 | 36.562005 | 0.4577  | -0.39681 | 0.26666 | 100.13 | 16.929309 |
| MOL012245 | 3 | 6 | 36.626886 | 0.43274 | -0.3189  | 0.26833 | 96.22  | 16.121862 |
| MOL002932 | 2 | 6 | 76.25705  | 0.84393 | 0.30644  | 0.2915  | 89.13  | 16.779089 |
| MOL002917 | 3 | 7 | 45.047428 | 0.47539 | -0.11487 | 0.33057 | 109.36 | 16.36913  |
| MOL002915 | 1 | 6 | 49.065926 | 0.85539 | -0.0269  | 0.33279 | 78.13  | 15.866038 |
| MOL001490 | 0 | 4 | 43.593325 | 0.97947 | 0.67555  | 0.34531 | 52.6   | 3.02355   |
| MOL000552 | 2 | 7 | 31.712465 | 0.92784 | -0.00472 | 0.35462 | 98.36  | 16.469237 |
| MOL012266 | 2 | 7 | 37.940234 | 0.64576 | -0.12959 | 0.3663  | 98.36  | 16.24749  |
| MOL002879 | 0 | 4 | 43.593325 | 0.7934  | 0.26014  | 0.39247 | 52.6   | 3.599307  |
| MOL001506 | 0 | 0 | 33.545943 | 2.08183 | 1.73017  | 0.42161 |        | 2.721453  |
| MOL002927 | 2 | 8 | 69.510434 | 0.6751  | -0.0733  | 0.4379  | 107.59 | 16.141974 |
| MOL002934 | 2 | 8 | 104.34461 | 0.73692 | -0.19207 | 0.43917 | 107.59 | 16.49732  |
| MOL002909 | 4 | 9 | 33.815826 | 0.35427 | -0.59001 | 0.44739 | 138.82 | 15.939098 |
| MOL000359 | 1 | 1 | 36.913906 | 1.32059 | 0.87298  | 0.7512  | 20.23  | 5.371091  |
| MOL000358 | 1 | 1 | 36.913906 | 1.32463 | 0.98588  | 0.75123 | 20.23  | 5.355491  |
| MOL000449 | 1 | 1 | 43.829852 | 1.44458 | 1.00045  | 0.75665 | 20.23  | 5.574595  |
| MOL002897 | 0 | 4 | 43.092332 | 1.16601 | 0.39823  | 0.7761  | 40.8   | 6.098007  |
| MOL001458 | 0 | 4 | 30.671852 | 1.21396 | 0.32474  | 0.85647 | 40.8   | 9.333815  |
