# Supplementary material for: Identification of Bioactive Compounds and Potential Mechanisms of Kuntai Capsule in the Treatment of Polycystic Ovary Syndrome by Integrating Network Pharmacology and Bioinformatics
Source: Hindawi journal article supplement (doi:10.1155/2022/3145938), 2022-01-01
Supplement: f2 [file 3145938.f2.pdf]

| Drug                | MolId     | Symbol   |
|---------------------|-----------|----------|
| PAEONIAE RADIX ALBA | MOL001919 | PGR      |
| PAEONIAE RADIX ALBA | MOL001919 | NR3C2    |
| PAEONIAE RADIX ALBA | MOL001924 | TNFAIP6  |
| PAEONIAE RADIX ALBA | MOL001924 | IL6R     |
| PAEONIAE RADIX ALBA | MOL001924 | CD14     |
| PAEONIAE RADIX ALBA | MOL001924 | LBP      |
| PAEONIAE RADIX ALBA | MOL000211 | PGR      |
| PAEONIAE RADIX ALBA | MOL000358 | PGR      |
| PAEONIAE RADIX ALBA | MOL000358 | NCOA2    |
| PAEONIAE RADIX ALBA | MOL000358 | PTGS1    |
| PAEONIAE RADIX ALBA | MOL000358 | PTGS2    |
| PAEONIAE RADIX ALBA | MOL000358 | HSP90AA1 |
| PAEONIAE RADIX ALBA | MOL000358 | KCNH2    |
| PAEONIAE RADIX ALBA | MOL000358 | PRKACA   |
| PAEONIAE RADIX ALBA | MOL000358 | DRD1     |
| PAEONIAE RADIX ALBA | MOL000358 | CHRM3    |
| PAEONIAE RADIX ALBA | MOL000358 | CHRM1    |
| PAEONIAE RADIX ALBA | MOL000358 | SCN5A    |
| PAEONIAE RADIX ALBA | MOL000358 | CHRM4    |
| PAEONIAE RADIX ALBA | MOL000358 | PDE3A    |
| PAEONIAE RADIX ALBA | MOL000358 | ADRA1A   |
| PAEONIAE RADIX ALBA | MOL000358 | CHRM2    |
| PAEONIAE RADIX ALBA | MOL000358 | ADRA1B   |
| PAEONIAE RADIX ALBA | MOL000358 | ADRB2    |
| PAEONIAE RADIX ALBA | MOL000358 | CHRNA2   |
| PAEONIAE RADIX ALBA | MOL000358 | SLC6A4   |
| PAEONIAE RADIX ALBA | MOL000358 | OPRM1    |
| PAEONIAE RADIX ALBA | MOL000358 | CHRNA7   |
| PAEONIAE RADIX ALBA | MOL000358 | BCL2     |
| PAEONIAE RADIX ALBA | MOL000358 | BAX      |
| PAEONIAE RADIX ALBA | MOL000358 | CASP9    |
| PAEONIAE RADIX ALBA | MOL000358 | JUN      |
| PAEONIAE RADIX ALBA | MOL000358 | CASP3    |
| PAEONIAE RADIX ALBA | MOL000358 | CASP8    |
| PAEONIAE RADIX ALBA | MOL000358 | PRKCA    |
| PAEONIAE RADIX ALBA | MOL000358 | PON1     |
| PAEONIAE RADIX ALBA | MOL000358 | MAP2     |
| PAEONIAE RADIX ALBA | MOL000359 | PGR      |
| PAEONIAE RADIX ALBA | MOL000359 | NCOA2    |
| PAEONIAE RADIX ALBA | MOL000359 | NR3C2    |
| PAEONIAE RADIX ALBA | MOL000422 | NOS2     |
| PAEONIAE RADIX ALBA | MOL000422 | PTGS1    |
| PAEONIAE RADIX ALBA | MOL000422 | AR       |
| PAEONIAE RADIX ALBA | MOL000422 | PPARG    |
| PAEONIAE RADIX ALBA | MOL000422 | PTGS2    |
| PAEONIAE RADIX ALBA | MOL000422 | HSP90AA1 |
| PAEONIAE RADIX ALBA | MOL000422 | PRKACA   |
| PAEONIAE RADIX ALBA | MOL000422 | NCOA2    |
| PAEONIAE RADIX ALBA | MOL000422 | DPP4     |
| PAEONIAE RADIX ALBA | MOL000422 | PRSS1    |
| PAEONIAE RADIX ALBA | MOL000422 | PGR      |
| PAEONIAE RADIX ALBA | MOL000422 | F2       |
| PAEONIAE RADIX ALBA | MOL000422 | CHRM1    |

|                     |           |          |
|---------------------|-----------|----------|
| PAEONIAE RADIX ALBA | MOL000422 | ACHE     |
| PAEONIAE RADIX ALBA | MOL000422 | SLC6A2   |
| PAEONIAE RADIX ALBA | MOL000422 | CHRM2    |
| PAEONIAE RADIX ALBA | MOL000422 | ADRA1B   |
| PAEONIAE RADIX ALBA | MOL000422 | TOP2A    |
| PAEONIAE RADIX ALBA | MOL000422 | F7       |
| PAEONIAE RADIX ALBA | MOL000422 | CAMKMT   |
| PAEONIAE RADIX ALBA | MOL000422 | RELA     |
| PAEONIAE RADIX ALBA | MOL000422 | IKBKB    |
| PAEONIAE RADIX ALBA | MOL000422 | AKT1     |
| PAEONIAE RADIX ALBA | MOL000422 | BCL2     |
| PAEONIAE RADIX ALBA | MOL000422 | BAX      |
| PAEONIAE RADIX ALBA | MOL000422 | TNFAIP6  |
| PAEONIAE RADIX ALBA | MOL000422 | JUN      |
| PAEONIAE RADIX ALBA | MOL000422 | AHSA1    |
| PAEONIAE RADIX ALBA | MOL000422 | CASP3    |
| PAEONIAE RADIX ALBA | MOL000422 | MAPK8    |
| PAEONIAE RADIX ALBA | MOL000422 | MMP1     |
| PAEONIAE RADIX ALBA | MOL000422 | STAT1    |
| PAEONIAE RADIX ALBA | MOL000422 | CDK1     |
| PAEONIAE RADIX ALBA | MOL000422 | PPARG    |
| PAEONIAE RADIX ALBA | MOL000422 | HMOX1    |
| PAEONIAE RADIX ALBA | MOL000422 | CYP3A4   |
| PAEONIAE RADIX ALBA | MOL000422 | NPPB     |
| PAEONIAE RADIX ALBA | MOL000422 | CYP1A1   |
| PAEONIAE RADIX ALBA | MOL000422 | ICAM1    |
| PAEONIAE RADIX ALBA | MOL000422 | SELE     |
| PAEONIAE RADIX ALBA | MOL000422 | VCAM1    |
| PAEONIAE RADIX ALBA | MOL000422 | NR1I2    |
| PAEONIAE RADIX ALBA | MOL000422 | CYP1B1   |
| PAEONIAE RADIX ALBA | MOL000422 | ALOX5    |
| PAEONIAE RADIX ALBA | MOL000422 | HAS2     |
| PAEONIAE RADIX ALBA | MOL000422 | AHR      |
| PAEONIAE RADIX ALBA | MOL000422 | PSMD3    |
| PAEONIAE RADIX ALBA | MOL000422 | SLC2A4   |
| PAEONIAE RADIX ALBA | MOL000422 | NR1I3    |
| PAEONIAE RADIX ALBA | MOL000422 | INSRR    |
| PAEONIAE RADIX ALBA | MOL000422 | DIO1     |
| PAEONIAE RADIX ALBA | MOL000422 | PPP3CA   |
| PAEONIAE RADIX ALBA | MOL000422 | GSTM1    |
| PAEONIAE RADIX ALBA | MOL000422 | GSTM2    |
| PAEONIAE RADIX ALBA | MOL000422 | AKR1C3   |
| PAEONIAE RADIX ALBA | MOL000422 | SLPI     |
| PAEONIAE RADIX ALBA | MOL000492 | PTGS1    |
| PAEONIAE RADIX ALBA | MOL000492 | ESR1     |
| PAEONIAE RADIX ALBA | MOL000492 | PTGS2    |
| PAEONIAE RADIX ALBA | MOL000492 | HSP90AA1 |
| PAEONIAE RADIX ALBA | MOL000492 | DPEP1    |
| PAEONIAE RADIX ALBA | MOL000492 | PRKACA   |
| PAEONIAE RADIX ALBA | MOL000492 | NCOA2    |
| PAEONIAE RADIX ALBA | MOL000492 | CAMKMT   |
| PAEONIAE RADIX ALBA | MOL000492 | RXRA     |
| PAEONIAE RADIX ALBA | MOL000492 | NPPB     |
| PAEONIAE RADIX ALBA | MOL000492 | HAS2     |

|                 |           |          |
|-----------------|-----------|----------|
| PORID           | MOL000273 | NR3C2    |
| PORID           | MOL000273 | NCOA2    |
| PORID           | MOL000275 | NR3C2    |
| PORID           | MOL000279 | NR3C2    |
| PORID           | MOL000282 | PGR      |
| PORID           | MOL000283 | PGR      |
| PORID           | MOL000296 | PGR      |
| PORID           | MOL000296 | NCOA2    |
| PORID           | MOL000296 | CHRM3    |
| PORID           | MOL000296 | CHRM1    |
| PORID           | MOL000296 | CHRM2    |
| PORID           | MOL000296 | ADRA1B   |
| PORID           | MOL000296 | GRIA2    |
| PORID           | MOL000296 | IGHG1    |
| PORID           | MOL000296 | NPPB     |
| PORID           | MOL000296 | NPPB     |
| PORID           | MOL000296 | LYG1     |
| PORID           | MOL000296 | PTGS1    |
| PORID           | MOL000296 | SCN5A    |
| PORID           | MOL000296 | PTGS2    |
| PORID           | MOL000296 | RXRA     |
| PORID           | MOL000296 | PDE3A    |
| PORID           | MOL000296 | SLC6A2   |
| COPTIDISRHIZOMA | MOL001454 | NOS2     |
| COPTIDISRHIZOMA | MOL001454 | PTGS1    |
| COPTIDISRHIZOMA | MOL001454 | KCNH2    |
| COPTIDISRHIZOMA | MOL001454 | ESR1     |
| COPTIDISRHIZOMA | MOL001454 | AR       |
| COPTIDISRHIZOMA | MOL001454 | SCN5A    |
| COPTIDISRHIZOMA | MOL001454 | F10      |
| COPTIDISRHIZOMA | MOL001454 | PTGS2    |
| COPTIDISRHIZOMA | MOL001454 | RXRA     |
| COPTIDISRHIZOMA | MOL001454 | ADRB2    |
| COPTIDISRHIZOMA | MOL001454 | HSP90AA1 |
| COPTIDISRHIZOMA | MOL001454 | PRKACA   |
| COPTIDISRHIZOMA | MOL001454 | PRSS1    |
| COPTIDISRHIZOMA | MOL001454 | NCOA2    |
| COPTIDISRHIZOMA | MOL001454 | PDE10A   |
| COPTIDISRHIZOMA | MOL001454 | CAMKMT   |
| COPTIDISRHIZOMA | MOL002894 | NOS2     |
| COPTIDISRHIZOMA | MOL002894 | PTGS1    |
| COPTIDISRHIZOMA | MOL002894 | KCNH2    |
| COPTIDISRHIZOMA | MOL002894 | ESR1     |
| COPTIDISRHIZOMA | MOL002894 | AR       |
| COPTIDISRHIZOMA | MOL002894 | SCN5A    |
| COPTIDISRHIZOMA | MOL002894 | PTGS2    |
| COPTIDISRHIZOMA | MOL002894 | RXRA     |
| COPTIDISRHIZOMA | MOL002894 | PRKACA   |
| COPTIDISRHIZOMA | MOL002894 | PRSS1    |
| COPTIDISRHIZOMA | MOL002894 | NCOA2    |
| COPTIDISRHIZOMA | MOL002894 | CAMKMT   |
| COPTIDISRHIZOMA | MOL002897 | NOS2     |
| COPTIDISRHIZOMA | MOL002897 | KCNH2    |
| COPTIDISRHIZOMA | MOL002897 | ESR1     |

|                 |           |          |
|-----------------|-----------|----------|
| COPTIDISRHIZOMA | MOL002897 | AR       |
| COPTIDISRHIZOMA | MOL002897 | PTGS2    |
| COPTIDISRHIZOMA | MOL002897 | RXRA     |
| COPTIDISRHIZOMA | MOL002897 | PRKACA   |
| COPTIDISRHIZOMA | MOL002897 | PRSS1    |
| COPTIDISRHIZOMA | MOL002897 | NCOA2    |
| COPTIDISRHIZOMA | MOL002897 | PDE10A   |
| COPTIDISRHIZOMA | MOL002903 | PTGS1    |
| COPTIDISRHIZOMA | MOL002903 | CHRM3    |
| COPTIDISRHIZOMA | MOL002903 | KCNH2    |
| COPTIDISRHIZOMA | MOL002903 | CHRM1    |
| COPTIDISRHIZOMA | MOL002903 | SCN5A    |
| COPTIDISRHIZOMA | MOL002903 | F10      |
| COPTIDISRHIZOMA | MOL002903 | CHRM5    |
| COPTIDISRHIZOMA | MOL002903 | PTGS2    |
| COPTIDISRHIZOMA | MOL002903 | ADRA2C   |
| COPTIDISRHIZOMA | MOL002903 | CHRM4    |
| COPTIDISRHIZOMA | MOL002903 | OPRD1    |
| COPTIDISRHIZOMA | MOL002903 | ADRA1B   |
| COPTIDISRHIZOMA | MOL002903 | SLC6A3   |
| COPTIDISRHIZOMA | MOL002903 | ADRB2    |
| COPTIDISRHIZOMA | MOL002903 | ADRA1D   |
| COPTIDISRHIZOMA | MOL002903 | SLC6A4   |
| COPTIDISRHIZOMA | MOL002903 | OPRM1    |
| COPTIDISRHIZOMA | MOL002903 | HSP90AA1 |
| COPTIDISRHIZOMA | MOL002903 | PRKACA   |
| COPTIDISRHIZOMA | MOL002903 | PDE10A   |
| COPTIDISRHIZOMA | MOL002903 | CAMKMT   |
| COPTIDISRHIZOMA | MOL002903 | DRD1     |
| COPTIDISRHIZOMA | MOL002903 | DRD5     |
| COPTIDISRHIZOMA | MOL002903 | RXRA     |
| COPTIDISRHIZOMA | MOL002903 | SLC6A2   |
| COPTIDISRHIZOMA | MOL002903 | ADRA1A   |
| COPTIDISRHIZOMA | MOL002903 | CHRM2    |
| COPTIDISRHIZOMA | MOL002904 | NOS2     |
| COPTIDISRHIZOMA | MOL002904 | PTGS1    |
| COPTIDISRHIZOMA | MOL002904 | CHRM3    |
| COPTIDISRHIZOMA | MOL002904 | KCNH2    |
| COPTIDISRHIZOMA | MOL002904 | AR       |
| COPTIDISRHIZOMA | MOL002904 | SCN5A    |
| COPTIDISRHIZOMA | MOL002904 | F10      |
| COPTIDISRHIZOMA | MOL002904 | PTGS2    |
| COPTIDISRHIZOMA | MOL002904 | F7       |
| COPTIDISRHIZOMA | MOL002904 | RXRA     |
| COPTIDISRHIZOMA | MOL002904 | ADRA1B   |
| COPTIDISRHIZOMA | MOL002904 | ADRB2    |
| COPTIDISRHIZOMA | MOL002904 | ADRA1D   |
| COPTIDISRHIZOMA | MOL002904 | HSP90AA1 |
| COPTIDISRHIZOMA | MOL002904 | PRKACA   |
| COPTIDISRHIZOMA | MOL002904 | PRSS1    |
| COPTIDISRHIZOMA | MOL002904 | NCOA2    |
| COPTIDISRHIZOMA | MOL002904 | CAMKMT   |
| COPTIDISRHIZOMA | MOL002907 | NR3C2    |
| COPTIDISRHIZOMA | MOL002907 | NCOA2    |

|                 |           |          |
|-----------------|-----------|----------|
| COPTIDISRHIZOMA | MOL000622 | GRIA2    |
| COPTIDISRHIZOMA | MOL000785 | NOS2     |
| COPTIDISRHIZOMA | MOL000785 | PTGS1    |
| COPTIDISRHIZOMA | MOL000785 | KCNH2    |
| COPTIDISRHIZOMA | MOL000785 | ESR1     |
| COPTIDISRHIZOMA | MOL000785 | AR       |
| COPTIDISRHIZOMA | MOL000785 | SCN5A    |
| COPTIDISRHIZOMA | MOL000785 | PTGS2    |
| COPTIDISRHIZOMA | MOL000785 | RXRA     |
| COPTIDISRHIZOMA | MOL000785 | ADRB2    |
| COPTIDISRHIZOMA | MOL000785 | ESR2     |
| COPTIDISRHIZOMA | MOL000785 | HSP90AA1 |
| COPTIDISRHIZOMA | MOL000785 | PRSS1    |
| COPTIDISRHIZOMA | MOL000785 | NCOA2    |
| COPTIDISRHIZOMA | MOL000785 | CAMKMT   |
| COPTIDISRHIZOMA | MOL000785 | PRKACA   |
| COPTIDISRHIZOMA | MOL000785 | CDK2     |
| COPTIDISRHIZOMA | MOL000785 | F7       |
| COPTIDISRHIZOMA | MOL000098 | PTGS1    |
| COPTIDISRHIZOMA | MOL000098 | AR       |
| COPTIDISRHIZOMA | MOL000098 | PPARG    |
| COPTIDISRHIZOMA | MOL000098 | PTGS2    |
| COPTIDISRHIZOMA | MOL000098 | HSP90AA1 |
| COPTIDISRHIZOMA | MOL000098 | NCOA2    |
| COPTIDISRHIZOMA | MOL000098 | DPP4     |
| COPTIDISRHIZOMA | MOL000098 | AKR1B1   |
| COPTIDISRHIZOMA | MOL000098 | PRSS1    |
| COPTIDISRHIZOMA | MOL000098 | TOP2A    |
| COPTIDISRHIZOMA | MOL000098 | F2       |
| COPTIDISRHIZOMA | MOL000098 | KCNH2    |
| COPTIDISRHIZOMA | MOL000098 | SCN5A    |
| COPTIDISRHIZOMA | MOL000098 | F10      |
| COPTIDISRHIZOMA | MOL000098 | ADRB2    |
| COPTIDISRHIZOMA | MOL000098 | MMP3     |
| COPTIDISRHIZOMA | MOL000098 | PRKACA   |
| COPTIDISRHIZOMA | MOL000098 | F7       |
| COPTIDISRHIZOMA | MOL000098 | RXRA     |
| COPTIDISRHIZOMA | MOL000098 | ACHE     |
| COPTIDISRHIZOMA | MOL000098 | MAOB     |
| COPTIDISRHIZOMA | MOL000098 | RELA     |
| COPTIDISRHIZOMA | MOL000098 | EGFR     |
| COPTIDISRHIZOMA | MOL000098 | AKT1     |
| COPTIDISRHIZOMA | MOL000098 | NPPB     |
| COPTIDISRHIZOMA | MOL000098 | CCND1    |
| COPTIDISRHIZOMA | MOL000098 | BCL2     |
| COPTIDISRHIZOMA | MOL000098 | BCL2L1   |
| COPTIDISRHIZOMA | MOL000098 | FOS      |
| COPTIDISRHIZOMA | MOL000098 | CDKN1A   |
| COPTIDISRHIZOMA | MOL000098 | EIF6     |
| COPTIDISRHIZOMA | MOL000098 | BAX      |
| COPTIDISRHIZOMA | MOL000098 | CASP9    |
| COPTIDISRHIZOMA | MOL000098 | PLAU     |
| COPTIDISRHIZOMA | MOL000098 | MMP2     |
| COPTIDISRHIZOMA | MOL000098 | MMP9     |

|                 |           |          |
|-----------------|-----------|----------|
| COPTIDISRHIZOMA | MOL000098 | MAPK1    |
| COPTIDISRHIZOMA | MOL000098 | IL10RA   |
| COPTIDISRHIZOMA | MOL000098 | RB1      |
| COPTIDISRHIZOMA | MOL000098 | TNFAIP6  |
| COPTIDISRHIZOMA | MOL000098 | JUN      |
| COPTIDISRHIZOMA | MOL000098 | IL6R     |
| COPTIDISRHIZOMA | MOL000098 | AHSA1    |
| COPTIDISRHIZOMA | MOL000098 | CASP3    |
| COPTIDISRHIZOMA | MOL000098 | TP53     |
| COPTIDISRHIZOMA | MOL000098 | ELK1     |
| COPTIDISRHIZOMA | MOL000098 | NFKBIA   |
| COPTIDISRHIZOMA | MOL000098 | ODC1     |
| COPTIDISRHIZOMA | MOL000098 | CASP8    |
| COPTIDISRHIZOMA | MOL000098 | TOP1     |
| COPTIDISRHIZOMA | MOL000098 | RAF1     |
| COPTIDISRHIZOMA | MOL000098 | SOD1     |
| COPTIDISRHIZOMA | MOL000098 | PRKCA    |
| COPTIDISRHIZOMA | MOL000098 | MMP1     |
| COPTIDISRHIZOMA | MOL000098 | HIF1A    |
| COPTIDISRHIZOMA | MOL000098 | STAT1    |
| COPTIDISRHIZOMA | MOL000098 | RUNX1T1  |
| COPTIDISRHIZOMA | MOL000098 | CDK1     |
| COPTIDISRHIZOMA | MOL000098 | HSPA5    |
| COPTIDISRHIZOMA | MOL000098 | ERBB2    |
| COPTIDISRHIZOMA | MOL000098 | PPARG    |
| COPTIDISRHIZOMA | MOL000098 | ACACA    |
| COPTIDISRHIZOMA | MOL000098 | HMOX1    |
| COPTIDISRHIZOMA | MOL000098 | CYP3A4   |
| COPTIDISRHIZOMA | MOL000098 | CAV1     |
| COPTIDISRHIZOMA | MOL000098 | MYC      |
| COPTIDISRHIZOMA | MOL000098 | F3       |
| COPTIDISRHIZOMA | MOL000098 | GJA1     |
| COPTIDISRHIZOMA | MOL000098 | CYP1A1   |
| COPTIDISRHIZOMA | MOL000098 | ICAM1    |
| COPTIDISRHIZOMA | MOL000098 | IL1B     |
| COPTIDISRHIZOMA | MOL000098 | CCL2     |
| COPTIDISRHIZOMA | MOL000098 | SELE     |
| COPTIDISRHIZOMA | MOL000098 | VCAM1    |
| COPTIDISRHIZOMA | MOL000098 | CXCL8    |
| COPTIDISRHIZOMA | MOL000098 | PRKCB    |
| COPTIDISRHIZOMA | MOL000098 | BIRC5    |
| COPTIDISRHIZOMA | MOL000098 | DUOX2    |
| COPTIDISRHIZOMA | MOL000098 | NOS3     |
| COPTIDISRHIZOMA | MOL000098 | HSPB1    |
| COPTIDISRHIZOMA | MOL000098 | IL2RA    |
| COPTIDISRHIZOMA | MOL000098 | NR1I2    |
| COPTIDISRHIZOMA | MOL000098 | CYP1B1   |
| COPTIDISRHIZOMA | MOL000098 | CCNB1    |
| COPTIDISRHIZOMA | MOL000098 | PLAT     |
| COPTIDISRHIZOMA | MOL000098 | THBD     |
| COPTIDISRHIZOMA | MOL000098 | SERPINE1 |
| COPTIDISRHIZOMA | MOL000098 | IFNG     |
| COPTIDISRHIZOMA | MOL000098 | ALOX5    |
| COPTIDISRHIZOMA | MOL000098 | IL1A     |

|                 |           |        |
|-----------------|-----------|--------|
| COPTIDISRHIZOMA | MOL000098 | MPO    |
| COPTIDISRHIZOMA | MOL000098 | TOP2A  |
| COPTIDISRHIZOMA | MOL000098 | NCF1   |
| COPTIDISRHIZOMA | MOL000098 | ABCG2  |
| COPTIDISRHIZOMA | MOL000098 | HAS2   |
| COPTIDISRHIZOMA | MOL000098 | NFE2L2 |
| COPTIDISRHIZOMA | MOL000098 | NQO1   |
| COPTIDISRHIZOMA | MOL000098 | PARP1  |
| COPTIDISRHIZOMA | MOL000098 | AHR    |
| COPTIDISRHIZOMA | MOL000098 | PSMD3  |
| COPTIDISRHIZOMA | MOL000098 | SLC2A4 |
| COPTIDISRHIZOMA | MOL000098 | COL3A1 |
| COPTIDISRHIZOMA | MOL000098 | CXCL11 |
| COPTIDISRHIZOMA | MOL000098 | CXCL2  |
| COPTIDISRHIZOMA | MOL000098 | DCAF5  |
| COPTIDISRHIZOMA | MOL000098 | NR1I3  |
| COPTIDISRHIZOMA | MOL000098 | CHEK2  |
| COPTIDISRHIZOMA | MOL000098 | INSRR  |
| COPTIDISRHIZOMA | MOL000098 | CLDN4  |
| COPTIDISRHIZOMA | MOL000098 | PPARA  |
| COPTIDISRHIZOMA | MOL000098 | PPARD  |
| COPTIDISRHIZOMA | MOL000098 | HSF1   |
| COPTIDISRHIZOMA | MOL000098 | CXCL10 |
| COPTIDISRHIZOMA | MOL000098 | CHUK   |
| COPTIDISRHIZOMA | MOL000098 | SPP1   |
| COPTIDISRHIZOMA | MOL000098 | RUNX2  |
| COPTIDISRHIZOMA | MOL000098 | RASSF1 |
| COPTIDISRHIZOMA | MOL000098 | E2F1   |
| COPTIDISRHIZOMA | MOL000098 | E2F2   |
| COPTIDISRHIZOMA | MOL000098 | ACP3   |
| COPTIDISRHIZOMA | MOL000098 | CTSD   |
| COPTIDISRHIZOMA | MOL000098 | IGFBP3 |
| COPTIDISRHIZOMA | MOL000098 | IGF2   |
| COPTIDISRHIZOMA | MOL000098 | CD40LG |
| COPTIDISRHIZOMA | MOL000098 | IRF1   |
| COPTIDISRHIZOMA | MOL000098 | ERBB3  |
| COPTIDISRHIZOMA | MOL000098 | PON1   |
| COPTIDISRHIZOMA | MOL000098 | DIO1   |
| COPTIDISRHIZOMA | MOL000098 | PCOLCE |
| COPTIDISRHIZOMA | MOL000098 | NPEPPS |
| COPTIDISRHIZOMA | MOL000098 | HK2    |
| COPTIDISRHIZOMA | MOL000098 | RASA1  |
| COPTIDISRHIZOMA | MOL000098 | GSTM1  |
| COPTIDISRHIZOMA | MOL000098 | GSTM2  |
| COPTIDISRHIZOMA | MOL001458 | NOS2   |
| COPTIDISRHIZOMA | MOL001458 | PTGS1  |
| COPTIDISRHIZOMA | MOL001458 | KCNH2  |
| COPTIDISRHIZOMA | MOL001458 | ESR1   |
| COPTIDISRHIZOMA | MOL001458 | AR     |
| COPTIDISRHIZOMA | MOL001458 | SCN5A  |
| COPTIDISRHIZOMA | MOL001458 | PTGS2  |
| COPTIDISRHIZOMA | MOL001458 | PRSS1  |
| COPTIDISRHIZOMA | MOL002668 | NOS2   |
| COPTIDISRHIZOMA | MOL002668 | PTGS1  |

|                    |           |          |
|--------------------|-----------|----------|
| COPTIDISRHIZOMA    | MOL002668 | ESR1     |
| COPTIDISRHIZOMA    | MOL002668 | AR       |
| COPTIDISRHIZOMA    | MOL002668 | PTGS2    |
| COPTIDISRHIZOMA    | MOL002668 | CHEK1    |
| RADIX SCUTELLARIAE | MOL001689 | NOS2     |
| RADIX SCUTELLARIAE | MOL001689 | PTGS1    |
| RADIX SCUTELLARIAE | MOL001689 | AR       |
| RADIX SCUTELLARIAE | MOL001689 | PTGS2    |
| RADIX SCUTELLARIAE | MOL001689 | DPP4     |
| RADIX SCUTELLARIAE | MOL001689 | HSP90AA1 |
| RADIX SCUTELLARIAE | MOL001689 | CDK2     |
| RADIX SCUTELLARIAE | MOL001689 | PRKACA   |
| RADIX SCUTELLARIAE | MOL001689 | PRSS1    |
| RADIX SCUTELLARIAE | MOL001689 | NCOA2    |
| RADIX SCUTELLARIAE | MOL001689 | NCOA1    |
| RADIX SCUTELLARIAE | MOL001689 | CAMKMT   |
| RADIX SCUTELLARIAE | MOL001689 | CHEK1    |
| RADIX SCUTELLARIAE | MOL001689 | ADRB2    |
| RADIX SCUTELLARIAE | MOL001689 | PDE3A    |
| RADIX SCUTELLARIAE | MOL001689 | RELA     |
| RADIX SCUTELLARIAE | MOL001689 | BCL2     |
| RADIX SCUTELLARIAE | MOL001689 | CDKN1A   |
| RADIX SCUTELLARIAE | MOL001689 | BAX      |
| RADIX SCUTELLARIAE | MOL001689 | CASP3    |
| RADIX SCUTELLARIAE | MOL001689 | TP53     |
| RADIX SCUTELLARIAE | MOL001689 | CASP8    |
| RADIX SCUTELLARIAE | MOL001689 | FASN     |
| RADIX SCUTELLARIAE | MOL001689 | FASLG    |
| RADIX SCUTELLARIAE | MOL001689 | CYP19A1  |
| RADIX SCUTELLARIAE | MOL000173 | NOS2     |
| RADIX SCUTELLARIAE | MOL000173 | PTGS1    |
| RADIX SCUTELLARIAE | MOL000173 | ESR1     |
| RADIX SCUTELLARIAE | MOL000173 | AR       |
| RADIX SCUTELLARIAE | MOL000173 | SCN5A    |
| RADIX SCUTELLARIAE | MOL000173 | PPARG    |
| RADIX SCUTELLARIAE | MOL000173 | PTGS2    |
| RADIX SCUTELLARIAE | MOL000173 | RXRA     |
| RADIX SCUTELLARIAE | MOL000173 | PDE3A    |
| RADIX SCUTELLARIAE | MOL000173 | DPP4     |
| RADIX SCUTELLARIAE | MOL000173 | MAPK14   |
| RADIX SCUTELLARIAE | MOL000173 | GSK3B    |
| RADIX SCUTELLARIAE | MOL000173 | HSP90AA1 |
| RADIX SCUTELLARIAE | MOL000173 | CDK2     |
| RADIX SCUTELLARIAE | MOL000173 | CHEK1    |
| RADIX SCUTELLARIAE | MOL000173 | PRKACA   |
| RADIX SCUTELLARIAE | MOL000173 | PRSS1    |
| RADIX SCUTELLARIAE | MOL000173 | CAMKMT   |
| RADIX SCUTELLARIAE | MOL000173 | ADRB2    |
| RADIX SCUTELLARIAE | MOL000173 | RELA     |
| RADIX SCUTELLARIAE | MOL000173 | AKT1     |
| RADIX SCUTELLARIAE | MOL000173 | CCND1    |
| RADIX SCUTELLARIAE | MOL000173 | BCL2     |
| RADIX SCUTELLARIAE | MOL000173 | CDKN1A   |
| RADIX SCUTELLARIAE | MOL000173 | EIF6     |



|                    |           |          |
|--------------------|-----------|----------|
| RADIX SCUTELLARIAE | MOL000173 | BAX      |
| RADIX SCUTELLARIAE | MOL000173 | CASP9    |
| RADIX SCUTELLARIAE | MOL000173 | KDR      |
| RADIX SCUTELLARIAE | MOL000173 | TNFAIP6  |
| RADIX SCUTELLARIAE | MOL000173 | JUN      |
| RADIX SCUTELLARIAE | MOL000173 | IL6R     |
| RADIX SCUTELLARIAE | MOL000173 | AHSA1    |
| RADIX SCUTELLARIAE | MOL000173 | CASP3    |
| RADIX SCUTELLARIAE | MOL000173 | TP53     |
| RADIX SCUTELLARIAE | MOL000173 | TEP1     |
| RADIX SCUTELLARIAE | MOL000173 | MMP1     |
| RADIX SCUTELLARIAE | MOL000173 | CCL2     |
| RADIX SCUTELLARIAE | MOL000173 | PRKCD    |
| RADIX SCUTELLARIAE | MOL000173 | FN1      |
| RADIX SCUTELLARIAE | MOL000173 | CXCL8    |
| RADIX SCUTELLARIAE | MOL000173 | MCL1     |
| RADIX SCUTELLARIAE | MOL000228 | PTGS1    |
| RADIX SCUTELLARIAE | MOL000228 | DRD1     |
| RADIX SCUTELLARIAE | MOL000228 | CHRM3    |
| RADIX SCUTELLARIAE | MOL000228 | CHRM1    |
| RADIX SCUTELLARIAE | MOL000228 | ESR1     |
| RADIX SCUTELLARIAE | MOL000228 | SCN5A    |
| RADIX SCUTELLARIAE | MOL000228 | PTGS2    |
| RADIX SCUTELLARIAE | MOL000228 | RXRA     |
| RADIX SCUTELLARIAE | MOL000228 | PDE3A    |
| RADIX SCUTELLARIAE | MOL000228 | ADRA1A   |
| RADIX SCUTELLARIAE | MOL000228 | ADRA1B   |
| RADIX SCUTELLARIAE | MOL000228 | SLC6A3   |
| RADIX SCUTELLARIAE | MOL000228 | ADRB2    |
| RADIX SCUTELLARIAE | MOL000228 | SLC6A4   |
| RADIX SCUTELLARIAE | MOL000228 | HSP90AA1 |
| RADIX SCUTELLARIAE | MOL000228 | PRKACA   |
| RADIX SCUTELLARIAE | MOL000228 | PKIA     |
| RADIX SCUTELLARIAE | MOL000228 | CHRNA7   |
| RADIX SCUTELLARIAE | MOL000228 | MAOB     |
| RADIX SCUTELLARIAE | MOL000228 | CAMKMT   |
| RADIX SCUTELLARIAE | MOL002714 | PTGS1    |
| RADIX SCUTELLARIAE | MOL002714 | AR       |
| RADIX SCUTELLARIAE | MOL002714 | PTGS2    |
| RADIX SCUTELLARIAE | MOL002714 | HSP90AA1 |
| RADIX SCUTELLARIAE | MOL002714 | PRKACA   |
| RADIX SCUTELLARIAE | MOL002714 | DPP4     |
| RADIX SCUTELLARIAE | MOL002714 | PDE3A    |
| RADIX SCUTELLARIAE | MOL002714 | PRSS1    |
| RADIX SCUTELLARIAE | MOL002714 | NCOA2    |
| RADIX SCUTELLARIAE | MOL002714 | NCOA1    |
| RADIX SCUTELLARIAE | MOL002714 | CAMKMT   |
| RADIX SCUTELLARIAE | MOL002714 | RELA     |
| RADIX SCUTELLARIAE | MOL002714 | AKT1     |
| RADIX SCUTELLARIAE | MOL002714 | NPPB     |
| RADIX SCUTELLARIAE | MOL002714 | BCL2     |
| RADIX SCUTELLARIAE | MOL002714 | FOS      |
| RADIX SCUTELLARIAE | MOL002714 | BAX      |
| RADIX SCUTELLARIAE | MOL002714 | MMP9     |

|                    |           |          |
|--------------------|-----------|----------|
| RADIX SCUTELLARIAE | MOL002714 | CASP3    |
| RADIX SCUTELLARIAE | MOL002714 | TP53     |
| RADIX SCUTELLARIAE | MOL002714 | HIF1A    |
| RADIX SCUTELLARIAE | MOL002714 | FOSL1    |
| RADIX SCUTELLARIAE | MOL002714 | FOSL2    |
| RADIX SCUTELLARIAE | MOL002714 | CDK1     |
| RADIX SCUTELLARIAE | MOL002714 | CCNB1    |
| RADIX SCUTELLARIAE | MOL002714 | MPO      |
| RADIX SCUTELLARIAE | MOL002714 | AHR      |
| RADIX SCUTELLARIAE | MOL002714 | IGF2     |
| RADIX SCUTELLARIAE | MOL002714 | CYCS     |
| RADIX SCUTELLARIAE | MOL002714 | NFATC1   |
| RADIX SCUTELLARIAE | MOL002714 | TDRD7    |
| RADIX SCUTELLARIAE | MOL002714 | EGLN1    |
| RADIX SCUTELLARIAE | MOL002714 | NOX5     |
| RADIX SCUTELLARIAE | MOL002714 | FABP5    |
| RADIX SCUTELLARIAE | MOL002714 | APOD     |
| RADIX SCUTELLARIAE | MOL002909 | NOS2     |
| RADIX SCUTELLARIAE | MOL002909 | F2       |
| RADIX SCUTELLARIAE | MOL002909 | AR       |
| RADIX SCUTELLARIAE | MOL002909 | F10      |
| RADIX SCUTELLARIAE | MOL002909 | PTGS2    |
| RADIX SCUTELLARIAE | MOL002909 | PTPN1    |
| RADIX SCUTELLARIAE | MOL002909 | TOP2A    |
| RADIX SCUTELLARIAE | MOL002909 | DPP4     |
| RADIX SCUTELLARIAE | MOL002909 | PYGM     |
| RADIX SCUTELLARIAE | MOL002909 | HSP90AA1 |
| RADIX SCUTELLARIAE | MOL002909 | PRSS1    |
| RADIX SCUTELLARIAE | MOL002909 | NCOA2    |
| RADIX SCUTELLARIAE | MOL002910 | PTGS1    |
| RADIX SCUTELLARIAE | MOL002910 | PTGS2    |
| RADIX SCUTELLARIAE | MOL002910 | HSP90AA1 |
| RADIX SCUTELLARIAE | MOL002910 | PRKACA   |
| RADIX SCUTELLARIAE | MOL002913 | PTGS1    |
| RADIX SCUTELLARIAE | MOL002913 | PTGS2    |
| RADIX SCUTELLARIAE | MOL002913 | HSP90AA1 |
| RADIX SCUTELLARIAE | MOL002913 | PRKACA   |
| RADIX SCUTELLARIAE | MOL002914 | PTGS1    |
| RADIX SCUTELLARIAE | MOL002914 | PTGS2    |
| RADIX SCUTELLARIAE | MOL002914 | HSP90AA1 |
| RADIX SCUTELLARIAE | MOL002914 | PRKACA   |
| RADIX SCUTELLARIAE | MOL002914 | NCOA2    |
| RADIX SCUTELLARIAE | MOL002914 | PYGM     |
| RADIX SCUTELLARIAE | MOL002914 | CAMKMT   |
| RADIX SCUTELLARIAE | MOL002915 | NOS2     |
| RADIX SCUTELLARIAE | MOL002915 | PTGS1    |
| RADIX SCUTELLARIAE | MOL002915 | F2       |
| RADIX SCUTELLARIAE | MOL002915 | SCN5A    |
| RADIX SCUTELLARIAE | MOL002915 | F10      |
| RADIX SCUTELLARIAE | MOL002915 | PTGS2    |
| RADIX SCUTELLARIAE | MOL002915 | RXRA     |
| RADIX SCUTELLARIAE | MOL002915 | ACHE     |
| RADIX SCUTELLARIAE | MOL002915 | ADRA1B   |
| RADIX SCUTELLARIAE | MOL002915 | ADRB2    |

|                    |           |          |
|--------------------|-----------|----------|
| RADIX SCUTELLARIAE | MOL002915 | DPP4     |
| RADIX SCUTELLARIAE | MOL002915 | HSP90AA1 |
| RADIX SCUTELLARIAE | MOL002915 | IGHG1    |
| RADIX SCUTELLARIAE | MOL002915 | PRSS1    |
| RADIX SCUTELLARIAE | MOL002915 | NCOA2    |
| RADIX SCUTELLARIAE | MOL002915 | CAMKMT   |
| RADIX SCUTELLARIAE | MOL002915 | F7       |
| RADIX SCUTELLARIAE | MOL002917 | NOS2     |
| RADIX SCUTELLARIAE | MOL002917 | PTGS1    |
| RADIX SCUTELLARIAE | MOL002917 | AR       |
| RADIX SCUTELLARIAE | MOL002917 | SCN5A    |
| RADIX SCUTELLARIAE | MOL002917 | F10      |
| RADIX SCUTELLARIAE | MOL002917 | PTGS2    |
| RADIX SCUTELLARIAE | MOL002917 | TOP2A    |
| RADIX SCUTELLARIAE | MOL002917 | ESR2     |
| RADIX SCUTELLARIAE | MOL002917 | DPP4     |
| RADIX SCUTELLARIAE | MOL002917 | HSP90AA1 |
| RADIX SCUTELLARIAE | MOL002917 | CDK2     |
| RADIX SCUTELLARIAE | MOL002917 | CHEK1    |
| RADIX SCUTELLARIAE | MOL002917 | PRSS1    |
| RADIX SCUTELLARIAE | MOL002917 | NCOA2    |
| RADIX SCUTELLARIAE | MOL002917 | CAMKMT   |
| RADIX SCUTELLARIAE | MOL002925 | PTGS1    |
| RADIX SCUTELLARIAE | MOL002925 | AR       |
| RADIX SCUTELLARIAE | MOL002925 | PTGS2    |
| RADIX SCUTELLARIAE | MOL002925 | DPP4     |
| RADIX SCUTELLARIAE | MOL002925 | HSP90AA1 |
| RADIX SCUTELLARIAE | MOL002925 | PRKACA   |
| RADIX SCUTELLARIAE | MOL002927 | NOS2     |
| RADIX SCUTELLARIAE | MOL002927 | PTGS1    |
| RADIX SCUTELLARIAE | MOL002927 | F2       |
| RADIX SCUTELLARIAE | MOL002927 | KCNH2    |
| RADIX SCUTELLARIAE | MOL002927 | AR       |
| RADIX SCUTELLARIAE | MOL002927 | SCN5A    |
| RADIX SCUTELLARIAE | MOL002927 | F10      |
| RADIX SCUTELLARIAE | MOL002927 | PTGS2    |
| RADIX SCUTELLARIAE | MOL002927 | F7       |
| RADIX SCUTELLARIAE | MOL002927 | KDR      |
| RADIX SCUTELLARIAE | MOL002927 | CACNA2D1 |
| RADIX SCUTELLARIAE | MOL002927 | TOP2A    |
| RADIX SCUTELLARIAE | MOL002927 | DPP4     |
| RADIX SCUTELLARIAE | MOL002927 | HSP90AA1 |
| RADIX SCUTELLARIAE | MOL002927 | IGHG1    |
| RADIX SCUTELLARIAE | MOL002927 | PRSS1    |
| RADIX SCUTELLARIAE | MOL002927 | NCOA2    |
| RADIX SCUTELLARIAE | MOL002927 | NCOA1    |
| RADIX SCUTELLARIAE | MOL002927 | CAMKMT   |
| RADIX SCUTELLARIAE | MOL002928 | NOS2     |
| RADIX SCUTELLARIAE | MOL002928 | PTGS1    |
| RADIX SCUTELLARIAE | MOL002928 | AR       |
| RADIX SCUTELLARIAE | MOL002928 | SCN5A    |
| RADIX SCUTELLARIAE | MOL002928 | PTGS2    |
| RADIX SCUTELLARIAE | MOL002928 | RXRA     |
| RADIX SCUTELLARIAE | MOL002928 | PDE3A    |

|                    |           |          |
|--------------------|-----------|----------|
| RADIX SCUTELLARIAE | MOL002928 | ADRA1B   |
| RADIX SCUTELLARIAE | MOL002928 | ADRB2    |
| RADIX SCUTELLARIAE | MOL002928 | DPP4     |
| RADIX SCUTELLARIAE | MOL002928 | HSP90AA1 |
| RADIX SCUTELLARIAE | MOL002928 | PRKACA   |
| RADIX SCUTELLARIAE | MOL002928 | PRSS1    |
| RADIX SCUTELLARIAE | MOL002928 | NCOA1    |
| RADIX SCUTELLARIAE | MOL002928 | CAMKMT   |
| RADIX SCUTELLARIAE | MOL002928 | NCOA2    |
| RADIX SCUTELLARIAE | MOL002928 | PKIA     |
| RADIX SCUTELLARIAE | MOL002928 | BCL2     |
| RADIX SCUTELLARIAE | MOL002928 | IL6R     |
| RADIX SCUTELLARIAE | MOL002928 | CASP3    |
| RADIX SCUTELLARIAE | MOL002928 | CDK1     |
| RADIX SCUTELLARIAE | MOL002928 | NPPB     |
| RADIX SCUTELLARIAE | MOL002928 | CCNB1    |
| RADIX SCUTELLARIAE | MOL002928 | CDK7     |
| RADIX SCUTELLARIAE | MOL002928 | CYP2C9   |
| RADIX SCUTELLARIAE | MOL002932 | NOS2     |
| RADIX SCUTELLARIAE | MOL002932 | PTGS1    |
| RADIX SCUTELLARIAE | MOL002932 | AR       |
| RADIX SCUTELLARIAE | MOL002932 | SCN5A    |
| RADIX SCUTELLARIAE | MOL002932 | PTGS2    |
| RADIX SCUTELLARIAE | MOL002932 | ESR2     |
| RADIX SCUTELLARIAE | MOL002932 | DPP4     |
| RADIX SCUTELLARIAE | MOL002932 | HSP90AA1 |
| RADIX SCUTELLARIAE | MOL002932 | CDK2     |
| RADIX SCUTELLARIAE | MOL002932 | CHEK1    |
| RADIX SCUTELLARIAE | MOL002932 | PRSS1    |
| RADIX SCUTELLARIAE | MOL002932 | CAMKMT   |
| RADIX SCUTELLARIAE | MOL002932 | NCOA1    |
| RADIX SCUTELLARIAE | MOL002933 | NOS2     |
| RADIX SCUTELLARIAE | MOL002933 | PTGS1    |
| RADIX SCUTELLARIAE | MOL002933 | ESR1     |
| RADIX SCUTELLARIAE | MOL002933 | AR       |
| RADIX SCUTELLARIAE | MOL002933 | PPARG    |
| RADIX SCUTELLARIAE | MOL002933 | PTGS2    |
| RADIX SCUTELLARIAE | MOL002933 | DPP4     |
| RADIX SCUTELLARIAE | MOL002933 | PYGM     |
| RADIX SCUTELLARIAE | MOL002933 | MAPK14   |
| RADIX SCUTELLARIAE | MOL002933 | GSK3B    |
| RADIX SCUTELLARIAE | MOL002933 | HSP90AA1 |
| RADIX SCUTELLARIAE | MOL002933 | CDK2     |
| RADIX SCUTELLARIAE | MOL002933 | CHEK1    |
| RADIX SCUTELLARIAE | MOL002933 | PRSS1    |
| RADIX SCUTELLARIAE | MOL002933 | NCOA2    |
| RADIX SCUTELLARIAE | MOL002933 | CAMKMT   |
| RADIX SCUTELLARIAE | MOL002933 | PRKACA   |
| RADIX SCUTELLARIAE | MOL002934 | NOS2     |
| RADIX SCUTELLARIAE | MOL002934 | F2       |
| RADIX SCUTELLARIAE | MOL002934 | KCNH2    |
| RADIX SCUTELLARIAE | MOL002934 | ESR1     |
| RADIX SCUTELLARIAE | MOL002934 | AR       |
| RADIX SCUTELLARIAE | MOL002934 | SCN5A    |

|                    |           |          |
|--------------------|-----------|----------|
| RADIX SCUTELLARIAE | MOL002934 | PPARG    |
| RADIX SCUTELLARIAE | MOL002934 | F10      |
| RADIX SCUTELLARIAE | MOL002934 | PTGS2    |
| RADIX SCUTELLARIAE | MOL002934 | F7       |
| RADIX SCUTELLARIAE | MOL002934 | PTPN1    |
| RADIX SCUTELLARIAE | MOL002934 | TOP2A    |
| RADIX SCUTELLARIAE | MOL002934 | ESR2     |
| RADIX SCUTELLARIAE | MOL002934 | DPP4     |
| RADIX SCUTELLARIAE | MOL002934 | PYGM     |
| RADIX SCUTELLARIAE | MOL002934 | GSK3B    |
| RADIX SCUTELLARIAE | MOL002934 | HSP90AA1 |
| RADIX SCUTELLARIAE | MOL002934 | CHEK1    |
| RADIX SCUTELLARIAE | MOL002934 | PRSS1    |
| RADIX SCUTELLARIAE | MOL002934 | NCOA2    |
| RADIX SCUTELLARIAE | MOL002934 | CAMKMT   |
| RADIX SCUTELLARIAE | MOL002937 | PTGS1    |
| RADIX SCUTELLARIAE | MOL002937 | SCN5A    |
| RADIX SCUTELLARIAE | MOL002937 | PTGS2    |
| RADIX SCUTELLARIAE | MOL002937 | RXRA     |
| RADIX SCUTELLARIAE | MOL002937 | PDE3A    |
| RADIX SCUTELLARIAE | MOL002937 | ADRA1B   |
| RADIX SCUTELLARIAE | MOL002937 | ADRB2    |
| RADIX SCUTELLARIAE | MOL002937 | HSP90AA1 |
| RADIX SCUTELLARIAE | MOL002937 | PRKACA   |
| RADIX SCUTELLARIAE | MOL002937 | CAMKMT   |
| RADIX SCUTELLARIAE | MOL002937 | NCOA1    |
| RADIX SCUTELLARIAE | MOL000358 | PGR      |
| RADIX SCUTELLARIAE | MOL000358 | NCOA2    |
| RADIX SCUTELLARIAE | MOL000358 | PTGS1    |
| RADIX SCUTELLARIAE | MOL000358 | PTGS2    |
| RADIX SCUTELLARIAE | MOL000358 | HSP90AA1 |
| RADIX SCUTELLARIAE | MOL000358 | KCNH2    |
| RADIX SCUTELLARIAE | MOL000358 | PRKACA   |
| RADIX SCUTELLARIAE | MOL000358 | DRD1     |
| RADIX SCUTELLARIAE | MOL000358 | CHRM3    |
| RADIX SCUTELLARIAE | MOL000358 | CHRM1    |
| RADIX SCUTELLARIAE | MOL000358 | SCN5A    |
| RADIX SCUTELLARIAE | MOL000358 | CHRM4    |
| RADIX SCUTELLARIAE | MOL000358 | PDE3A    |
| RADIX SCUTELLARIAE | MOL000358 | ADRA1A   |
| RADIX SCUTELLARIAE | MOL000358 | CHRM2    |
| RADIX SCUTELLARIAE | MOL000358 | ADRA1B   |
| RADIX SCUTELLARIAE | MOL000358 | ADRB2    |
| RADIX SCUTELLARIAE | MOL000358 | CHRNA2   |
| RADIX SCUTELLARIAE | MOL000358 | SLC6A4   |
| RADIX SCUTELLARIAE | MOL000358 | OPRM1    |
| RADIX SCUTELLARIAE | MOL000358 | CHRNA7   |
| RADIX SCUTELLARIAE | MOL000358 | BCL2     |
| RADIX SCUTELLARIAE | MOL000358 | BAX      |
| RADIX SCUTELLARIAE | MOL000358 | CASP9    |
| RADIX SCUTELLARIAE | MOL000358 | JUN      |
| RADIX SCUTELLARIAE | MOL000358 | CASP3    |
| RADIX SCUTELLARIAE | MOL000358 | CASP8    |
| RADIX SCUTELLARIAE | MOL000358 | PRKCA    |

|                    |           |          |
|--------------------|-----------|----------|
| RADIX SCUTELLARIAE | MOL000358 | PON1     |
| RADIX SCUTELLARIAE | MOL000358 | MAP2     |
| RADIX SCUTELLARIAE | MOL000359 | PGR      |
| RADIX SCUTELLARIAE | MOL000359 | NCOA2    |
| RADIX SCUTELLARIAE | MOL000359 | NR3C2    |
| RADIX SCUTELLARIAE | MOL000525 | NOS2     |
| RADIX SCUTELLARIAE | MOL000525 | PTGS1    |
| RADIX SCUTELLARIAE | MOL000525 | AR       |
| RADIX SCUTELLARIAE | MOL000525 | PPARG    |
| RADIX SCUTELLARIAE | MOL000525 | PTGS2    |
| RADIX SCUTELLARIAE | MOL000525 | PDE3A    |
| RADIX SCUTELLARIAE | MOL000525 | DPP4     |
| RADIX SCUTELLARIAE | MOL000525 | HSP90AA1 |
| RADIX SCUTELLARIAE | MOL000525 | CDK2     |
| RADIX SCUTELLARIAE | MOL000525 | CHEK1    |
| RADIX SCUTELLARIAE | MOL000525 | PRKACA   |
| RADIX SCUTELLARIAE | MOL000552 | NOS2     |
| RADIX SCUTELLARIAE | MOL000552 | PTGS1    |
| RADIX SCUTELLARIAE | MOL000552 | F2       |
| RADIX SCUTELLARIAE | MOL000552 | KCNH2    |
| RADIX SCUTELLARIAE | MOL000552 | AR       |
| RADIX SCUTELLARIAE | MOL000552 | SCN5A    |
| RADIX SCUTELLARIAE | MOL000552 | F10      |
| RADIX SCUTELLARIAE | MOL000552 | PTGS2    |
| RADIX SCUTELLARIAE | MOL000552 | F7       |
| RADIX SCUTELLARIAE | MOL000552 | TOP2A    |
| RADIX SCUTELLARIAE | MOL000552 | ESR2     |
| RADIX SCUTELLARIAE | MOL000552 | DPP4     |
| RADIX SCUTELLARIAE | MOL000552 | PPARD    |
| RADIX SCUTELLARIAE | MOL000552 | HSP90AA1 |
| RADIX SCUTELLARIAE | MOL000552 | PRSS1    |
| RADIX SCUTELLARIAE | MOL000552 | NCOA2    |
| RADIX SCUTELLARIAE | MOL000552 | CAMKMT   |
| RADIX SCUTELLARIAE | MOL000552 | KDR      |
| RADIX SCUTELLARIAE | MOL000552 | NCOA1    |
| RADIX SCUTELLARIAE | MOL000073 | PTGS1    |
| RADIX SCUTELLARIAE | MOL000073 | ESR1     |
| RADIX SCUTELLARIAE | MOL000073 | PTGS2    |
| RADIX SCUTELLARIAE | MOL000073 | HSP90AA1 |
| RADIX SCUTELLARIAE | MOL000073 | DPEP1    |
| RADIX SCUTELLARIAE | MOL000073 | PRKACA   |
| RADIX SCUTELLARIAE | MOL000449 | PGR      |
| RADIX SCUTELLARIAE | MOL000449 | NR3C2    |
| RADIX SCUTELLARIAE | MOL000449 | NCOA2    |
| RADIX SCUTELLARIAE | MOL000449 | NPPB     |
| RADIX SCUTELLARIAE | MOL000449 | IGHG1    |
| RADIX SCUTELLARIAE | MOL000449 | RXRA     |
| RADIX SCUTELLARIAE | MOL000449 | NCOA1    |
| RADIX SCUTELLARIAE | MOL000449 | PTGS1    |
| RADIX SCUTELLARIAE | MOL000449 | PTGS2    |
| RADIX SCUTELLARIAE | MOL000449 | ADRA2A   |
| RADIX SCUTELLARIAE | MOL000449 | SLC6A2   |
| RADIX SCUTELLARIAE | MOL000449 | SLC6A3   |
| RADIX SCUTELLARIAE | MOL000449 | ADRB2    |

|                    |           |          |
|--------------------|-----------|----------|
| RADIX SCUTELLARIAE | MOL000449 | AKR1B1   |
| RADIX SCUTELLARIAE | MOL000449 | PLAU     |
| RADIX SCUTELLARIAE | MOL000449 | LTA4H    |
| RADIX SCUTELLARIAE | MOL000449 | MAOB     |
| RADIX SCUTELLARIAE | MOL000449 | MAOA     |
| RADIX SCUTELLARIAE | MOL000449 | PRKACA   |
| RADIX SCUTELLARIAE | MOL000449 | CTRB1    |
| RADIX SCUTELLARIAE | MOL000449 | CHRM3    |
| RADIX SCUTELLARIAE | MOL000449 | CHRM1    |
| RADIX SCUTELLARIAE | MOL000449 | ADRB1    |
| RADIX SCUTELLARIAE | MOL000449 | SCN5A    |
| RADIX SCUTELLARIAE | MOL000449 | ADRA1A   |
| RADIX SCUTELLARIAE | MOL000449 | CHRM2    |
| RADIX SCUTELLARIAE | MOL000449 | ADRA1B   |
| RADIX SCUTELLARIAE | MOL000449 | CHRNA7   |
| RADIX SCUTELLARIAE | MOL001458 | NOS2     |
| RADIX SCUTELLARIAE | MOL001458 | PTGS1    |
| RADIX SCUTELLARIAE | MOL001458 | KCNH2    |
| RADIX SCUTELLARIAE | MOL001458 | ESR1     |
| RADIX SCUTELLARIAE | MOL001458 | AR       |
| RADIX SCUTELLARIAE | MOL001458 | SCN5A    |
| RADIX SCUTELLARIAE | MOL001458 | PTGS2    |
| RADIX SCUTELLARIAE | MOL001458 | PRSS1    |
| RADIX SCUTELLARIAE | MOL001490 | SCN5A    |
| RADIX SCUTELLARIAE | MOL002879 | SCN5A    |
| RADIX SCUTELLARIAE | MOL002879 | ADRB2    |
| RADIX SCUTELLARIAE | MOL002879 | CHRM3    |
| RADIX SCUTELLARIAE | MOL002897 | NOS2     |
| RADIX SCUTELLARIAE | MOL002897 | KCNH2    |
| RADIX SCUTELLARIAE | MOL002897 | ESR1     |
| RADIX SCUTELLARIAE | MOL002897 | AR       |
| RADIX SCUTELLARIAE | MOL002897 | PTGS2    |
| RADIX SCUTELLARIAE | MOL002897 | RXRA     |
| RADIX SCUTELLARIAE | MOL002897 | PRKACA   |
| RADIX SCUTELLARIAE | MOL002897 | PRSS1    |
| RADIX SCUTELLARIAE | MOL002897 | NCOA2    |
| RADIX SCUTELLARIAE | MOL002897 | PDE10A   |
| RADIX SCUTELLARIAE | MOL008206 | NOS2     |
| RADIX SCUTELLARIAE | MOL008206 | PTGS1    |
| RADIX SCUTELLARIAE | MOL008206 | F2       |
| RADIX SCUTELLARIAE | MOL008206 | AR       |
| RADIX SCUTELLARIAE | MOL008206 | SCN5A    |
| RADIX SCUTELLARIAE | MOL008206 | PPARG    |
| RADIX SCUTELLARIAE | MOL008206 | PTGS2    |
| RADIX SCUTELLARIAE | MOL008206 | RXRA     |
| RADIX SCUTELLARIAE | MOL008206 | ESR2     |
| RADIX SCUTELLARIAE | MOL008206 | DPP4     |
| RADIX SCUTELLARIAE | MOL008206 | MAPK14   |
| RADIX SCUTELLARIAE | MOL008206 | GSK3B    |
| RADIX SCUTELLARIAE | MOL008206 | HSP90AA1 |
| RADIX SCUTELLARIAE | MOL008206 | CDK2     |
| RADIX SCUTELLARIAE | MOL008206 | CHEK1    |
| RADIX SCUTELLARIAE | MOL008206 | PRKACA   |
| RADIX SCUTELLARIAE | MOL008206 | PRSS1    |

|                             |           |          |
|-----------------------------|-----------|----------|
| RADIX SCUTELLARIAE          | MOL008206 | NCOA1    |
| RADIX SCUTELLARIAE          | MOL008206 | CAMKMT   |
| RADIX SCUTELLARIAE          | MOL008206 | ADRA1B   |
| RADIX SCUTELLARIAE          | MOL008206 | ADRB2    |
| RADIX SCUTELLARIAE          | MOL008206 | CHRNA7   |
| RADIX SCUTELLARIAE          | MOL010415 | NCOA2    |
| RADIX SCUTELLARIAE          | MOL012245 | PTGS1    |
| RADIX SCUTELLARIAE          | MOL012245 | PTGS2    |
| RADIX SCUTELLARIAE          | MOL012245 | CA2      |
| RADIX SCUTELLARIAE          | MOL012245 | HSP90AA1 |
| RADIX SCUTELLARIAE          | MOL012245 | PRKACA   |
| RADIX SCUTELLARIAE          | MOL012245 | CAMKMT   |
| RADIX SCUTELLARIAE          | MOL012246 | PTGS1    |
| RADIX SCUTELLARIAE          | MOL012246 | PTGS2    |
| RADIX SCUTELLARIAE          | MOL012246 | CA2      |
| RADIX SCUTELLARIAE          | MOL012246 | HSP90AA1 |
| RADIX SCUTELLARIAE          | MOL012246 | PRKACA   |
| RADIX SCUTELLARIAE          | MOL012266 | NOS2     |
| RADIX SCUTELLARIAE          | MOL012266 | PTGS1    |
| RADIX SCUTELLARIAE          | MOL012266 | F2       |
| RADIX SCUTELLARIAE          | MOL012266 | KCNH2    |
| RADIX SCUTELLARIAE          | MOL012266 | AR       |
| RADIX SCUTELLARIAE          | MOL012266 | SCN5A    |
| RADIX SCUTELLARIAE          | MOL012266 | F10      |
| RADIX SCUTELLARIAE          | MOL012266 | PTGS2    |
| RADIX SCUTELLARIAE          | MOL012266 | CA2      |
| RADIX SCUTELLARIAE          | MOL012266 | F7       |
| RADIX SCUTELLARIAE          | MOL012266 | KDR      |
| RADIX SCUTELLARIAE          | MOL012266 | RXRA     |
| RADIX SCUTELLARIAE          | MOL012266 | TOP2A    |
| RADIX SCUTELLARIAE          | MOL012266 | ESR2     |
| RADIX SCUTELLARIAE          | MOL012266 | DPP4     |
| RADIX SCUTELLARIAE          | MOL012266 | HSP90AA1 |
| RADIX SCUTELLARIAE          | MOL012266 | PRSS1    |
| RADIX SCUTELLARIAE          | MOL012266 | NCOA2    |
| RADIX SCUTELLARIAE          | MOL012266 | NCOA1    |
| RADIX SCUTELLARIAE          | MOL012266 | CAMKMT   |
| REHMANNIAE RADIX PRAEPARATA | MOL000359 | PGR      |
| REHMANNIAE RADIX PRAEPARATA | MOL000359 | NCOA2    |
| REHMANNIAE RADIX PRAEPARATA | MOL000359 | NR3C2    |
| REHMANNIAE RADIX PRAEPARATA | MOL000449 | PGR      |
| REHMANNIAE RADIX PRAEPARATA | MOL000449 | NR3C2    |
| REHMANNIAE RADIX PRAEPARATA | MOL000449 | NCOA2    |
| REHMANNIAE RADIX PRAEPARATA | MOL000449 | NPPB     |
| REHMANNIAE RADIX PRAEPARATA | MOL000449 | IGHG1    |
| REHMANNIAE RADIX PRAEPARATA | MOL000449 | RXRA     |
| REHMANNIAE RADIX PRAEPARATA | MOL000449 | NCOA1    |
| REHMANNIAE RADIX PRAEPARATA | MOL000449 | PTGS1    |
| REHMANNIAE RADIX PRAEPARATA | MOL000449 | PTGS2    |
| REHMANNIAE RADIX PRAEPARATA | MOL000449 | ADRA2A   |
| REHMANNIAE RADIX PRAEPARATA | MOL000449 | SLC6A2   |
| REHMANNIAE RADIX PRAEPARATA | MOL000449 | SLC6A3   |
| REHMANNIAE RADIX PRAEPARATA | MOL000449 | ADRB2    |
| REHMANNIAE RADIX PRAEPARATA | MOL000449 | AKR1B1   |



|            |       |            |           |        |
|------------|-------|------------|-----------|--------|
| REHMANNIAE | RADIX | PRAEPARATA | MOL000449 | PLAU   |
| REHMANNIAE | RADIX | PRAEPARATA | MOL000449 | LTA4H  |
| REHMANNIAE | RADIX | PRAEPARATA | MOL000449 | MAOB   |
| REHMANNIAE | RADIX | PRAEPARATA | MOL000449 | MAOA   |
| REHMANNIAE | RADIX | PRAEPARATA | MOL000449 | PRKACA |
| REHMANNIAE | RADIX | PRAEPARATA | MOL000449 | CTRB1  |
| REHMANNIAE | RADIX | PRAEPARATA | MOL000449 | CHRM3  |
| REHMANNIAE | RADIX | PRAEPARATA | MOL000449 | CHRM1  |
| REHMANNIAE | RADIX | PRAEPARATA | MOL000449 | ADRB1  |
| REHMANNIAE | RADIX | PRAEPARATA | MOL000449 | SCN5A  |
| REHMANNIAE | RADIX | PRAEPARATA | MOL000449 | ADRA1A |
| REHMANNIAE | RADIX | PRAEPARATA | MOL000449 | CHRM2  |
| REHMANNIAE | RADIX | PRAEPARATA | MOL000449 | ADRA1B |
| REHMANNIAE | RADIX | PRAEPARATA | MOL000449 | CHRNA7 |
