# Supplementary material for: Identification of Bioactive Compounds and Potential Mechanisms of Kuntai Capsule in the Treatment of Polycystic Ovary Syndrome by Integrating Network Pharmacology and Bioinformatics
Source: Hindawi journal article supplement (doi:10.1155/2022/3145938), 2022-01-01
Supplement: f3 [file 3145938.f3.pdf]

| Genecards database | disgenet database | NCBI database | OMIM database | pharGKB database |
|--------------------|-------------------|---------------|---------------|------------------|
| PCOS1              | CYP19A1           | TNF           | ACTG2         | PCOS1            |
| INS                | AKR1C3            | IL6           | ADAR          | CFTR             |
| SHBG               | STAR              | ADIPOQ        | AFF3          | ESR1             |
| ADIPOQ             | BCL2              | AR            | AGRN          | PKD3             |
| FSHR               | HSD3B1            | TP53          | AHDC1         | UBE3A            |
| FST                | FSHR              | VDR           | AKT3          | ESR2             |
| AMH                | LMNA              | PPARG         | ALG14         | PGR              |
| LEP                | GNAS              | VEGFA         | ALMS1         | PKD1P6           |
| DENND1A            | GDF9              | MTHFR         | ANAPC1        | PKD1P5           |
| PRL                | BMP15             | ACE           | ANTXR1        | PKD1P4           |
| INSR               | INS               | CRP           | ARID1A        | PKD1P3           |
| IGF1               | LEP               | ESR1          | ASXL2         | PKD1P2           |
| PPARG              | HSD3B2            | TGFB1         | ATAD3A        | ST8              |
| IRS1               | LIF               | SERPINE1      | ATP13A2       | PKHD1L1          |
| RETN               | LHB               | PON1          | B3GALT6       | PKD1P1           |
| CYP19A1            | RBP4              | IL1B          | BBS5          | PKD1L1           |
| AR                 | MMP2              | IL10          | BCL10         | OVCA2            |
| GHRL               | AZGP1             | FTO           | BCL11A        | PKDREJ           |
| CYP11A1            | MTNR1B            | INS           | BOLA3         | PKD2L2           |
| GNRH1              | SRD5A1            | HIF1A         | BSND          | PKD1L2           |
| CYP17A1            | GAB1              | MMP9          | CALM2         | PKD1L3           |
| CAPN10             | CGB5              | PTEN          | CASP10        | PKD2L1           |
| NAMPT              | MALAT1            | GHRL          | CASP8         | PKHD1            |
| IGFBP1             | AKT2              | BDNF          | CCDC28B       | VEGFA            |
| H6PD               | AKR1C1            | AKT1          | CCDC88A       | LEPR             |
| CGA                | CCNB1             | IGF1          | CD46          | RENS2            |
| CYP21A2            | MANEA             | CXCL8         | CDC42         | RSS              |
| IRS2               | ERRFI1            | LEP           | CDC73         | PKD1             |
| IGF2               | CLDN4             | RETN          | CDCA7         | MMP19            |
| THADA              | DMD               | NOS3          | CELA2A        | DPH1             |
| POR                | PNPLA2            | AGER          | CENPF         | PKD2             |
| GH1                | TFRC              | IFNG          | CEP104        | FAM32A           |
| SRD5A1             | BAX               | IL18          | CFH           | OCIAD2           |
| GAS5               | TNRC6B            | CYP17A1       | CFHR1         | POF18            |
| IGFBP3             | RP2               | NAMPT         | CFHR3         | DWS              |
| GDF9               | RAB2A             | MDM2          | CHN1          | KSS              |
| TCF7L2             | MAPK8IP3          | CCL2          | CHRM3         | LEP              |
| LINC01828          | FUT7              | MMP2          | CHRNA1        | RLN2             |
| ENSG00000234940    | TMEFF2            | NPPB          | CKAP2L        | PMPS             |
| ENSG00000286145    | IQCC              | ICAM1         | CLCNKA        | CDL1             |
| ENSG00000230704    | FLT4              | AMH           | CLCNKB        | CDL2             |
| AFA1               | LSM5              | CYP1A1        | CNNM4         | MYSA             |
| SERPINE1           | RPL37A            | IL17A         | COL11A1       | ICR4             |
| STAR               | RRM2              | LCN2          | COL3A1        | THAS             |
| CRP                | MAPRE3            | HMOX1         | COL5A2        | AIC              |
| SULT2A1            | PWWP2B            | IL1RN         | COL9A2        | ACLS             |
| HSD3B2             | TCF15             | ESR2          | COLEC11       | JBS              |
| VEGFA              | UBE2H             | MIF           | CXCR4         | BOK              |
| MSR1               | AKR1C2            | HMGB1         | DCAF17        | FGS2             |
| IL6                | TTLL9             | FSHR          | DCTN1         | FGS3             |
| MT-TL1             | TMF1              | TNFRSF11B     | DDR2          | TNR1             |
| TNF                | TOP2A             | HFE           | DDX59         | MBS1             |
| HSD11B1            | LINC00475         | SHBG          | DGUOK         | ADFN             |

|           |          |          |          |         |
|-----------|----------|----------|----------|---------|
| FTO       | PTCRA    | INSR     | DNMT3A   | SCKL3   |
| PON1      | TBX1     | HLA-G    | DVL1     | SRPSMCR |
| APOB      | S100P    | IL4      | EIF2AK2  | CAPN5   |
| ACE       | SCNN1A   | IGF1R    | EIF2AK3  | WS2B    |
| LHCGR     | SCT      | APOA1    | EN1      | RIEG2   |
| RBP4      | SFTPC    | IRS1     | ESPN     | MROS    |
| ADIPOR1   | DUX4L5   | LMNA     | F5       | DURS1   |
| APOA1     | ELAVL3   | IGF2     | FASLG    | ANCR    |
| PPARGC1A  | SOX15    | TCF7L2   | FIGLA    | CECR    |
| SLC2A4    | DLG4     | CYP19A1  | FLG2     | GTS     |
| MTHFR     | TTK      | MIR146A  | FSHR     | DCR     |
| ESR2      | LTK      | UGT1A1   | GATAD2B  | WHCR    |
| FBN3      | IGHG1    | LHCGR    | GLI2     | MSD     |
| ADIPOR2   | NMNAT3   | BAX      | GNAI3    | DGCR    |
| POMC      | TONSL    | APOB     | GNB1     | WBS2    |
| AGER      | ADGRD2   | CXCL10   | GPSM2    | LCS1    |
| ESR1      | S100A7A  | LPL      | GRHL3    | USH1E   |
| GATA6     | FOXP3    | IL2      | HAAO     | USH1A   |
| MC4R      | PDE3B    | WT1      | HADHA    | GPDS1   |
| REN       | HMMR     | PCSK9    | HFM1     | DGCR7   |
| PAEP      | BCL11A   | LEPR     | HHAT     | KERSMCR |
| AKR1C3    | ATF1     | IL1A     | HOXD13   | HTC1    |
| VDR       | MYBL1    | PGR      | HS2ST1   | PRS     |
| HSD3BP4   | LIFR     | RARRES2  | HSPG2    | NFXL1   |
| HSD17B6   | MAD2L1   | FOXO3    | IBA57    | WBSCR2  |
| AMHR2     | BLOC1S3  | PPARGC1A | IFIH1    | SMCR9   |
| IL1B      | KRT3     | DPP4     | IL6R     | SMCR3   |
| IL18      | SPATA21  | VCAM1    | IRF6     | TRESMCR |
| SRD5A2    | ZSWIM9   | CD40LG   | KCND3    | SMCR6   |
| IAPP      | ODF3B    | CAPN10   | KCNH1    | MCS     |
| HP        | TMEM151B | CHI3L1   | KCNJ10   | ATD     |
| DPP4      | ISYNA1   | TNFSF11  | KCNN3    | DGCR12  |
| PPARD     | NRG1     | PIK3R1   | KIF14    | EEC1    |
| PLA2G7    | HELLS    | CNR1     | KIRREL1  | EEC2    |
| BMP15     | ANLN     | TIMP1    | KYNU     | ERMP1   |
| MIF       | PTGER3   | GC       | LBR      | FILIP1L |
| CCL2      | PLEKHG5  | ENG      | LMNA     | DGCR6L  |
| PBX1      | REXO1    | STK11    | LMOD1    | MBS3    |
| LEPR      | ARHGAP23 | HNF1A    | LORICRIN | MBS2    |
| F5        | SPTBN4   | RUNX2    | LRIG2    | MEHMO   |
| FNDC5     | ASPM     | MALAT1   | LRP2     | ADAMTS1 |
| IGFBP2    | PRKD2    | PTX3     | LYST     | SMCR2   |
| ANGPTL8   | ARHGAP30 | ITLN1    | MDM4     | NOBOX   |
| CHIT1     | NPB      | FBN1     | MDS2     | OCIAD1  |
| SERPINA12 | PTAFR    | DICER1   | MPV17    | MRXS7   |
| ICAM1     | EMSY     | KLK3     | MPZ      | MRXS11  |
| ADAMTS1   | TNPO2    | HMGA2    | MSH2     | IMMP2L  |
| PTEN      | NOP53    | KL       | MSH6     | GALNS   |
| KLK3      | RACGAP1  | ANGPTL8  | MTOR     | DSCR4   |
| ADRB3     | LPCAT2   | GH1      | MTX2     | MSH4    |
| INSIG2    | CEP55    | MC4R     | MYCN     | PCYT1B  |
| MAP3K2-DT | TRPV6    | NGF      | MYSM1    | CECR3   |
| FAS       | GP1BB    | MIR27A   | NBAS     | SOHLH1  |
| PPARA     | CMTR2    | KISS1    | NECTIN4  | STRA8   |

|              |          |           |          |          |
|--------------|----------|-----------|----------|----------|
| FSHB         | PBK      | KCNJ11    | NFU1     | CECR9    |
| STK11        | TMEM151A | RBP4      | NLRC4    | MDS2     |
| RUNX2        | ABCB6    | ADM       | NLRP3    | KALP     |
| MIR21        | C12orf66 | UCP2      | NOS1AP   | AFP      |
| MIR323A      | ZMYM5    | IL6R      | NOTCH2   | FANCG    |
| GNAS         | RHPN1    | SERPINF1  | NPHP1    | NO53     |
| ALDH1A3      | CAMK2D   | TIMP2     | NPHP4    | KDR      |
| CXCL8        | TEAD2    | SREBF1    | NPHS2    | DGCR9    |
| LEPQTL1      | CKS2     | WNT5A     | NRAS     | FSHB     |
| AKT2         | CNTROB   | FNDC5     | NRXN1    | SDCCAG8  |
| PYY          | MGAT5B   | HSD11B1   | NUP133   | CECR7    |
| GCG          | ADAMTS7  | AHSG      | ODC1     | DGCR11   |
| AKT1         | PDLIM4   | SOCS1     | ORC1     | DGCR10   |
| PCSK9        | HACD1    | APLN      | ORC4     | KITLG    |
| KISS1        | SRSF10   | AVP       | PADI3    | RIPPLY3  |
| MMP9         | RUNX3    | GHR       | PBX1     | USHBP1   |
| GIP          | ADARB1   | BGLAP     | PER3     | PKP1     |
| ADRB2        | FGF18    | PLAT      | PHGDH    | PRG4     |
| MIR135A1     | CCNE2    | SAA1      | PIGF     | RCC1L    |
| SREBF1       | ZNF205   | CX3CL1    | PIGV     | GTSCR1   |
| GSTM1        | DDX54    | CPB2      | PIK3CD   | MIEF1    |
| KISS1R       | RASL10B  | NPY       | PKP1     | METTL27  |
| MIR222       | SAP30L   | CASP9     | PLOD1    | ANOS1    |
| MIR320A      | LARP4    | PRL       | POGZ     | INHA     |
| HSD11B2      | CDC6     | EPHX1     | POLR1B   | TCTN2    |
| ANXA5        | TAB1     | SRD5A2    | POU3F3   | WASL     |
| PTX3         | BBOF1    | SLC2A4    | PPP1CB   | DSCR10   |
| LOC108964933 | JSRP1    | ADIPOR1   | PREPL    | EVC2     |
| UCP2         | ZNF430   | ADA       | PRG4     | HYLS1    |
| ITLN1        | MORN1    | GZMB      | PSMB4    | DGCR6    |
| ADA          | FBX044   | ENPP1     | PTCH2    | ZNRD2    |
| IDE          | CARMIL3  | GLP1R     | RAB3GAP1 | HDHD5    |
| IL17A        | DCBLD2   | IRS2      | RAB3GAP2 | HPS3     |
| MIR145       | DACT3    | IGFBP1    | RBM8A    | BCS1L    |
| HMGB1        | CDH15    | CRH       | RC3H1    | BCL2L1   |
| CGB5         | HOOK3    | CCN1      | RFX5     | ANG      |
| NR1H3        | LRATD1   | MIR203A   | RIT1     | NHS      |
| MUC1         | THAP3    | MIR223    | RNU4ATAC | ANGPT1   |
| MIR146A      | IL34     | HDAC3     | RYR2     | EREG     |
| MIR27A       | PGR      | MSTN      | SATB2    | EVC      |
| MIR483       | RARRES2  | CYP11A1   | SCN1A    | BBS12    |
| MAPK3        | HSD17B7  | NR1H3     | SDCCAG8  | FOXC1    |
| GPB1         | NR3C1    | DCN       | SF3B1    | SSNA1    |
| INSL3        | ADRB2    | LOX       | SKI      | OCRL     |
| CYP1A1       | CD36     | INHBA     | SLC19A2  | CRLF1    |
| GPT          | ADRB3    | AKT2      | SLC25A24 | TBL2     |
| MIR486-1     | NCOR1    | ANGPTL4   | SLC2A1   | AMMECR1  |
| HOXA10       | TNFSF10  | NUCB2     | SLC5A7   | WBSCR23  |
| MIR23A       | TH       | MTNR1B    | SLC9A1   | SAMHD1   |
| MIR486-2     | DENND1A  | MIR222    | SOS1     | INHBA    |
| INHA         | INSR     | TNFRSF11A | SOX11    | ARVCF    |
| MIR23B       | SLPI     | NR4A1     | SPEN     | DSCR8    |
| WT1          | THADA    | FAAH      | SPRNTN   | NPHP3    |
| PEPD         | NGFR     | MMP8      | ST3GAL5  | WHSC1L2P |

|          |               |          |         |          |
|----------|---------------|----------|---------|----------|
| GPX3     | ADRA1D        | FABP1    | STAMPB  | HPRT1    |
| MIR155   | ADRA1A        | XPA      | SUCLG1  | AMH      |
| PWRN2    | LHCGR         | HSP90B1  | SYT2    | VPS26C   |
| RARRES2  | ADRA1B        | CSF3     | TBCE    | LFNG     |
| TLR2     | ATP5F1B       | INHA     | TBX15   | DMC1     |
| GRP      | PPARG         | HMGCR    | TCHH    | PISRT1   |
| ADO      | YAP1          | MIR142   | TET3    | SMCR5    |
| NOTCH3   | PTEN          | ARF6     | TGFB2   | VGFB     |
| ITGAX    | AOPEP         | PEPD     | TMC01   | XK       |
| MIR30C1  | HNF1A         | UGT2B7   | TMEM237 | SMCR8    |
| MIR30C2  | ATM           | TFAP2A   | TPRKB   | FGFR2    |
| IGF1R    | ERBB4         | SLC30A8  | TTC7A   | ACSBG1   |
| BRCA2    | LIPE          | NCOR1    | USH2A   | EIF2B2   |
| BRCA1    | HMGA2         | VCAN     | VANGL1  | AGT      |
| TP53     | VCAN          | GATA6    | WDPCP   | EIF2B4   |
| PKHD1    | CBX2          | MIR125B1 | WDR26   | INHBB    |
| ATM      | FOS           | HOXA10   | WIPF1   | NRIP1    |
| MSH2     | CAV1          | SMAD1    | WNT4    | CCND2    |
| MSH6     | SETD2         | FST      | YY1AP1  | DGCR5    |
| TSC2     | PLIN1         | FADS1    | ZEB2    | C8orf37  |
| CEP290   | ERBB3         | ARNTL    |         | FOXL2    |
| FBN1     | SERPINE1      | AKR1C3   |         | TAF4     |
| PIK3CA   | AGPAT2        | SREBF2   |         | EIF2B5   |
| CDH1     | IGF1          | ACAN     |         | IPW      |
| RAD51D   | BAZ1B         | ADAMTS1  |         | CEP290   |
| RAD51C   | AMH           | IDE      |         | TMEM121B |
| PALB2    | ANTXR2        | ADIPOR2  |         | PLA2G4A  |
| CHEK2    | MAP3K1        | AZGP1    |         | ZMPSTE24 |
| NBN      | DHH           | IGF2BP2  |         | MIEF2    |
| BRAF     | IRS2          | PAEP     |         | RNASEH2C |
| MLH1     | MTHFR         | FADS2    |         | MMP14    |
| KRAS     | VCAN-AS1      | CCK      |         | CCNE1    |
| BRIP1    | TBL2          | HCRT     |         | SBDSP1   |
| PTCH1    | CRB1          | MTNR1A   |         | SSB      |
| PMS2     | RFC2          | MIR23A   |         | DSCR9    |
| CC2D2A   | FST           | SLC22A1  |         | TMEM270  |
| FMR1     | TICRR         | ACVR1    |         | FGF7     |
| APC      | PRL           | GAB1     |         | EDN2     |
| CTNNB1   | FLT1          | INSL3    |         | BMPR1B   |
| NF1      | IL6           | PYY      |         | FRAS1    |
| DICER1   | CDK2          | TGFBR3   |         | SUGCT    |
| ERCC6    | FBN3          | FGF19    |         | ESS2     |
| FGFR2    | RETN          | PRKAA2   |         | SPART    |
| RAD50    | CAPN10        | GDF9     |         | CECR2    |
| C11orf65 | CORIN         | KISS1R   |         | BBS10    |
| OFD1     | LINC02055     | PNPLA2   |         | NSUN5P1  |
| MKS1     | GTF2I         | TRIB3    |         | GALNT17  |
| BLM      | LMNB2         | SLC18A2  |         | SIRT1    |
| MUTYH    | GCG           | SMAD5    |         | NIPA1    |
| GANAB    | STON1-GTF2A1L | LUM      |         | GTF2H5   |
| BARD1    | CCDC91        | GPX3     |         | MKS1     |
| KCNQ1    | POR           | BMP15    |         | TKT      |
| SEC63    | IL1B          | ITGAX    |         | MID1     |
| SMAD4    | CAVIN1        | APLNR    |         | BSND     |

|          |          |          |         |
|----------|----------|----------|---------|
| TMEM67   | BSCL2    | INHBB    | PCNT    |
| DYNC2H1  | NR5A1    | LHB      | IDS     |
| ERBB2    | PON1     | LIPE     | BUD23   |
| NPHP3    | GABRB1   | GIP      | MLF1    |
| PRKCSH   | POMC     | MT-TL1   | SOD1    |
| FOXL2    | IL1A     | SFRP4    | CC2D2A  |
| LMNA     | BRD2     | MIR23B   | ITSN1   |
| JAK2     | SULT2A1  | HAS2     | USH1G   |
| RPGRIP1L | ELN      | THADA    | HPS5    |
| FLNA     | SOX5     | GJA4     | CLDN4   |
| TSC1     | TGFB2    | UGT2B15  | CFM2    |
| BBS1     | SOX3     | NRIP1    | CFM1    |
| HNF1B    | KIF7     | SRA1     | DSCAM   |
| MRE11    | FTO      | LEPQTL1  | PANK2   |
| MECP2    | TNF      | CYP2R1   | FBN1    |
| LRP5     | CYP17A1  | SRD5A1   | HPS6    |
| SDHD     | ESR1     | DENND1A  | TP53    |
| ALG9     | CYP2B6   | PRDX4    | CFTRP1  |
| NR5A1    | SLC2A4   | MIR130B  | KCNQ1   |
| BBS10    | ACE      | MIR486-1 | ETV2    |
| COL4A5   | SOX9     | SGTA     | BBSS    |
| TP63     | DMRT1    | MIR483   | USH1C   |
| BBS4     | CRP      | SFRP5    | CD177   |
| PTPN11   | ZBTB16   | MIR423   | DCAF17  |
| ALMS1    | SRY      | H6PD     | ETV3L   |
| HRAS     | WT1      | MIR125B2 | CSTF2T  |
| PMM2     | TCF7L2   | HOXA11   | NIPA2   |
| RET      | NROB1    | MIR19B1  | SBDS    |
| EGFR     | ALMS1    | MIR30C1  | SPG21   |
| STAG3    | GTF2IRD1 | AMHR2    | BAZ1B   |
| MKKS     | CLIP2    | LPP      | ETV6    |
| FRAXA    | VEGFA    | APPL1    | ETV5    |
| ATRX     | LIMK1    | ADAMTS9  | USH2A   |
| TGFBR2   | CYP11A1  | GYS1     | DGCR2   |
| SDHB     | VDR      | ZNF217   | ALG3    |
| RAF1     | IKZF3    | AQP8     | DSCAML1 |
| TMEM216  | ADIPOQ   | HAS1     | TCOF1   |
| FGFR3    | CIDEA    | ENHO     | BBS9    |
| MIR17    | MMP14    | CCN5     | ELN     |
| STAT3    | IRS1     | BANCR    | ADA2    |
| BBS2     | MAPRE1   | MIR33B   | TRPS1   |
| NOTCH1   | MSX1     | IL18BP   | NSD3    |
| XRCC2    | AR       | WNT2B    | CLCF1   |
| BBS12    | IRF1-AS1 | EPHA7    | BBS7    |
| POLE     | STOX1    | GREB1    | HPS4    |
| MTOR     | PMEL     | NFIC     | WRN     |
| POLG     | SHBG     | HAS3     | ETV3    |
| TMEM231  | ANGPTL8  | MIR30C2  | NSUN5P2 |
| MIR15A   | DPP4     | RAD54B   | ETV4    |
| AHI1     | AMHR2    | STK26    | SCHIP1  |
| VHL      | KISS1    | FBN3     | SCNN1B  |
| MAP3K1   | IGF2     | MIR323A  | ETV1    |
| FGFR1    | TGFB1    | INHBC    | PSAP    |
| NUP107   | GLP1R    | OSGIN1   | MECP2   |

|         |          |          |          |
|---------|----------|----------|----------|
| BMPR1A  | CYP21A2  | MGAM     | WAS      |
| NSD1    | HSD11B1  | PRKAG3   | ETV7     |
| ALB     | LEPR     | ZP4      | EBP      |
| CDKN1C  | GHRL     | PDE8A    | OFD1     |
| GLI3    | IL10     | HSD17B6  | BLOC1S3  |
| NPHP1   | CXCL8    | MIOX     | PYGM     |
| GALT    | H6PD     | FEM1B    | HPS1     |
| COL3A1  | LDLR     | C1QTNF12 | ERCC5    |
| TTC21B  | FSHB     | FEM1A    | ATRX     |
| BBS5    | IL18     | C1QL3    | BBS2     |
| IL10    | ESR2     | MIR486-2 | PEX2     |
| IFT140  | PPARGC1A | PWRN2    | USP10    |
| NOTCH2  | PLG      | MCF2L2   | ALMS1    |
| TCTN2   | PIK3CG   | NEWENTRY | NSD2     |
| WDR19   | CYP1A1   | YAP1     | WFS1     |
| BBS9    | ADIPOR1  | APOE     | NDN      |
| RAD51   | PIK3CD   | STAT3    | SCN5A    |
| NPHS1   | AGRP     | HLA-DRB1 | BCL2     |
| BBS7    | PIK3CB   | COMT     | BMP4     |
| RB1     | ARTN     | CD274    | TAZ      |
| SOX9    | PIK3CA   | PCOS1    | CD40LG   |
| SUFU    | MIR93    | NR3C1    | TWIST1   |
| SLC2A1  | APOA1    | GSTM1    | BBS1     |
| GJB2    | APOB     | MIR21    | PRNP     |
| PRKAR1A | ICAM1    | CD4      | GOPC     |
| MITF    | GNRHR    | ADRB2    | CYLD     |
| MIR200B | ADAMTS1  | CDKN1A   | MKKS     |
| MIR200A | SLC2A1   | GSTT1    | RPGRIP1L |
| MIR223  | EGF      | TLR2     | CD74     |
| MEN1    | ALB      | F2       | EEGV1    |
| TGFBR1  | CASP3    | ATM      | BVR1     |
| COL5A1  | KLK3     | DRD2     | RNVU1-11 |
| COL2A1  | IL1RN    | F5       | RNVU1-1  |
| EPCAM   | MMP9     | GSK3B    | RNVU1-7  |
| COL4A3  | MC4R     | HLA-DQB1 | RNU6V    |
| JAG1    | MAPK3    | SPP1     | UBE2V1P1 |
| TGFB2   | PDCD4    | LGALS3   | ERCC6    |
| CDKN1B  | FOXO1    | AGT      | RNVU1-18 |
| SRY     | PTH      | PDCD1    | GLRA1    |
| AIRE    | ACTB     | EDN1     | PF4V1    |
| MAPK1   | HSD17B6  | SOD2     | BBS4     |
| TGFB1   | AKT1     | MAPK3    | TAGLN    |
| UBE3A   | F5       | CDKN1B   | C1QTNF5  |
| POF1B   | PCOS1    | AGTR1    | BLM      |
| FRAS1   | CAT      | MIR155   | CALR     |
| NPHP4   | KISS1R   | LDLR     | MFRP     |
| NRAS    | ADIPOR2  | ABCA1    | FGFR1    |
| ZEB2    | MTOR     | CYP21A2  | KIF17    |
| MIR200C | LPA      | HBA1     | UBE2V2   |
| CHD7    | ENPP1    | EGF      | ARMC10   |
| NROB1   | STK11    | E2F1     | THPO     |
| SLC26A4 | STS      | FOXO1    | CLN6     |
| FANCC   | CHST3    | IGFBP3   | UBE2V1   |
| SGO2    | GSK3B    | C3       | DFNM1    |

|          |          |           |        |
|----------|----------|-----------|--------|
| WFS1     | NGF      | HP        | CC2D1A |
| SDCCAG8  | PPARA    | KCNQ1     | BIRC5  |
| COL4A4   | HSD17B1  | PLAUR     | SLC1A3 |
| CPLANE1  | GC       | TOX3      | NOX1   |
| B9D1     | GATA6    | IL33      |        |
| PAX3     | INHA     | HSPB1     |        |
| FLCN     | SMAD2    | HAMP      |        |
| PAX2     | HSD17B2  | S100A9    |        |
| NOBOX    | NUCB2    | PLA2G7    |        |
| IFT172   | MIR27A   | NRG1      |        |
| UGT1A1   | MIR155   | NQO1      |        |
| MET      | SMAD3    | GDF15     |        |
| WDPCP    | LCN2     | CD36      |        |
| HSPG2    | APOE     | H19       |        |
| ARL13B   | ZGLP1    | NOTCH3    |        |
| MT-CYB   | IARS1    | TNFRSF1B  |        |
| MYC      | ENHO     | TRPV1     |        |
| GJA1     | KCNJ11   | GNB3      |        |
| EGF      | IFNG     | FABP4     |        |
| MIR214   | MIR223   | IAPP      |        |
| MRPS22   | ITGAX    | SUOX      |        |
| MMP2     | IGFBP1   | POSTN     |        |
| PDGFRA   | STAT3    | ERBB4     |        |
| BNC1     | MIR486-1 | FGF21     |        |
| PRKCD    | MAPK8    | PTH       |        |
| SOS1     | AGTR2    | F13A1     |        |
| PREPL    | CFTR     | CD28      |        |
| TYROBP   | PRKAA2   | PKD1      |        |
| TTC8     | KRR1     | TNFRSF10B |        |
| MIR31    | DKK1     | PECAM1    |        |
| NRXN1    | GPT      | GPB1      |        |
| MIR210   | EHMT1    | MIR29A    |        |
| CASP10   | CNR1     | CD163     |        |
| MIRLET7I | ROS1     | POMC      |        |
| KIF7     | AGT      | SERPINA12 |        |
| HSD17B4  | PLA2G7   | IL23A     |        |
| NIPBL    | SIRT1    | TGFB2     |        |
| SMAD3    | PCSK9    | WWTR1     |        |
| EDN1     | PROK1    | ANXA5     |        |
| COL5A2   | ZNF410   | REN       |        |
| MT-ATP6  | HAMP     | GGT1      |        |
| SETD2    | FN1      | GNAQ      |        |
| THBD     | PTGS2    | NR5A1     |        |
| COL1A1   | BGLAP    | PDCD4     |        |
| CSPP1    | FAAH     | RAB5B     |        |
| MUC16    | SOD2     | TFAM      |        |
| KIT      | SOCS3    | IL6ST     |        |
| CHRNE    | VCAM1    | IL32      |        |
| LRRC56   | ACACA    | ATF4      |        |
| C3       | BMP6     | IL1R1     |        |
| SDHC     | CCL2     | PRF1      |        |
| TGFB3    | HLA-DRB1 | TNFSF12   |        |
| MSH3     | UCP2     | HSD11B2   |        |
| CDK4     | TP53     | MIR93     |        |

|         |         |               |
|---------|---------|---------------|
| CCND1   | CPA1    | LIF           |
| DNAJB11 | ADA     | GAS5          |
| CDKN1A  | FBN1    | STON1-GTF2A1L |
| IQCB1   | HSD11B2 | RAB5A         |
| PIK3R1  | APLN    | TXNIP         |
| MDM2    | EGFR    | GNRHR         |
| EIF2B2  | CCND2   | PON2          |
| FIGLA   | HOXA10  | XDH           |
| PAX6    | HMGB1   | XIST          |
| TCTN1   | MECP2   | ESM1          |
| CHRND   | BMPR2   | APOC1         |
| LIG4    | SMAD7   | PRLR          |
| H19     | MIR200C | APOA4         |
| MIR429  | SRD5A2  | SET           |
| MMP14   | SPARC   | ZFP36L2       |
| EDNRB   | SPP1    | CHIT1         |
| FREM2   | SREBF1  | HHEX          |
| APOE    | ZNF217  | GREM1         |
| ATR     | SUOX    | CDKAL1        |
| IFT88   | WNT3A   | HSD17B1       |
| AKT3    | TBC1D4  | STS           |
| NOS3    | TPD52   | ADRA2B        |
| TBX5    | TPM2    | STAR          |
| POLD1   | MIR21   | MIR320A       |
| SMC1A   | CAPN5   | STC1          |
| PMS1    | MIR204  | PAFAH1B1      |
| CASP3   | VIM     | UTS2          |
| ARID1B  | MIR146A | MIR335        |
| CASP8   | MIR145  | SULT2A1       |
| INVS    | VIP     | LPIN1         |
| CD40LG  | MIR222  | MIR27B        |
| TMEM107 | TAC3    | PLIN1         |
| ERCC4   | MIR34A  | HSD3B1        |
| DGCR2   | MIR320A | CYP11B1       |
| PSMC3IP | CD44    | SLC22A2       |
| ARL6    | PIK3R1  | LBP           |
| KLLN    | MIR33B  | KIR3DS1       |
| CFI     | MIR92B  | MC3R          |
| HDAC8   | WNT2B   | CYP3A7        |
| GPC3    | TGFBR1  | ATP5F1B       |
| DNMT3A  | TLR4    | FSHB          |
| ELN     | MIR141  | ANGPTL3       |
| TYMP    | MEF2A   | KIR2DS4       |
| COMT    | PAPSS2  | ANGPTL2       |
| FOS     | PAEP    | SH2B3         |
| ACTB    | PTPA    | AQP9          |
| MT-ND1  | NPR2    | GTF2A1L       |
| LRP2    | NPPC    | MIR99A        |
| TCTN3   | NOTCH1  | CARTPT        |
| DSP     | FEM1A   | FERMT3        |
| IFT80   | PRKAA1  | MIR135A1      |
| ESCO2   | PRKAB1  | PRKAR2B       |
| SIX1    | AVP     | EDN2          |
| GATA3   | SQSTM1  | HSD17B2       |



|          |          |           |
|----------|----------|-----------|
| HIF1A    | CDKAL1   | SERPINA4  |
| FH       | PKD1     | COPA      |
| MT-CO1   | PLAT     | PLIN3     |
| BDNF     | PCSK1    | MIR574    |
| DROSHA   | PCNA     | MMP26     |
| DIAPH2   | TMED7    | C1QTNF3   |
| PGR      | PLXNA2   | MIR103A1  |
| CIITA    | IL22     | AQP7      |
| KCNJ5    | SERPINB2 | TACR3     |
| B9D2     | NOS3     | TOR2A     |
| BMP4     | BAAT     | TBC1D4    |
| SST      | PSMD9    | BCO1      |
| AFP      | MIR323A  | AKAP8     |
| CHRNA1   | S100A6   | SGK3      |
| FGF2     | SET      | MIR136    |
| ANOS1    | SFRP4    | SORBS1    |
| ALG8     | SGTA     | AOPEP     |
| TRAF3IP1 | CGB8     | FGF13     |
| HLA-B    | KITLG    | AFM       |
| SATB2    | MFAP1    | COL8A1    |
| PKD1L1   | MIR324   | CAPN5     |
| VIM      | COX2     | GPC4      |
| TMEM138  | REN      | MEP1A     |
| FAT4     | RUNX2    | UCN3      |
| JUN      | ATF4     | ANGPTL6   |
| UGT1A6   | MSC      | KLF7      |
| SHH      | PTX3     | MIR760    |
| ERBB3    | MOK      | SLC5A3    |
| SOX3     | RNR1     | MIR151A   |
| CDC73    | RB1      | SORCS1    |
| CDH2     | MTNR1A   | SUMO1P1   |
| HPRT1    | MUC1     | ANGPTL1   |
| EDNRA    | TOX3     | INSL5     |
| CHRNB1   | NOC2L    | METRNL    |
| SCN1A    | INHBA    | USP34     |
| CCND2    | ELANE    | MIR592    |
| BUB1B    | DCTN6    | LEAP2     |
| RAB3GAP2 | GATA4    | HSD3B7    |
| PTGS2    | RBM45    | MIR1294   |
| UGT1A8   | EDN1     | TM4SF4    |
| CFTR     | AGTR1    | NENF      |
| SMC3     | COMT     | MIR518C   |
| MSX1     | GPX1     | CTBP1-AS  |
| HAX1     | HSPA1A   | LNCSRLR   |
| ZNF423   | ZNRD2    | LINC02402 |
| LIMK1    | PRDX4    | LNCOC1    |
| MYH8     | RNU1-1   |           |
| WNT5A    | ADM      |           |
| MLX      | GPX3     |           |
| SALL1    | HSPB1    |           |
| BCL2L1   | EPHX1    |           |
| TTR      | IAPP     |           |
| GAPDH    | INSL3    |           |
| GLI1     | AGER     |           |

|          |              |
|----------|--------------|
| AIP      | GH1          |
| CYLD     | H3P23        |
| TH       | TICAM2       |
| NEK8     | APRT         |
| SRC      | ACAN         |
| CTLA4    | AQP8         |
| ESS2     | CYP1B1       |
| WNT4     | IFI27        |
| GHR      | DCN          |
| CFB      | AQP7         |
| CAV1     | MSTN         |
| BCL2     | CGA          |
| CHRNA4   | INHBB        |
| B2M      | CGB3         |
| CSF3     | GPR83        |
| SERPINA1 | IL17A        |
| ADAMTS13 | DBP          |
| DCTN1    | KRT16        |
| AGK      | RHOG         |
| BAX      | FCGR1B       |
| ENG      | TMED7-TICAM2 |
| TBX3     | ANGPTL2      |
| RUNX1    | HIF1A        |
| ALDH3A2  | HP           |
| UGT1A9   | RAD50        |
| GDF6     | AKR1B1       |
| CXCL12   | NR4A1        |
| TNXB     | LINC01672    |
| DES      | FCGR1A       |
| VCAN     | HHEX         |
| HNF4A    | FKBP4        |
| AFF2     | HLA-A        |
| DVL1     | MMRN1        |
| NDUFAF2  | LPL          |
| RASA1    | AQP9         |
| IL2      | CCN2         |
| IFNG     | HTC2         |
| CEP57    | HOTAIR       |
| KRT7     | LOX          |
| SNAP29   | FCGR1CP      |
| ZMPSTE24 | FGF2         |
| AOPEP    | FABP4        |
| MPV17    | FABP1        |
| KDR      | F3           |
| GATA4    | LPIN1        |
| SHANK3   | THBS1        |
| NSD2     | ECI1         |
| NKX2-5   | DECR1        |
| H2AC18   | TFAM         |
| ATRIP    | TFAP2A       |
| BSCL2    | SLC47A2      |
| IL1A     | CTF1         |
| CXCR4    | TLE5         |
| IDH1     | DAPK1        |

|          |          |
|----------|----------|
| GNRHR    | DDIT3    |
| PLCG2    | TIMP1    |
| PIK3R2   | DBH      |
| PAX8     | CRISP2   |
| STIM1    | C3       |
| BAZ1B    | TPT1     |
| ANTXR2   | ANGPTL6  |
| PROKR2   | CYP51A1  |
| CP       | TNFAIP3  |
| FLNB     | TNFRSF1B |
| SEC23B   | CYP3A7   |
| TFAP2A   | TOP1     |
| NOG      | CYP11B1  |
| FLT1     | CYC1     |
| TET2     | TM4SF4   |
| PROM1    | TIMP3    |
| MIR221   | TIMP4    |
| GTF2IRD1 | TLR2     |
| COL4A1   | CTLA4    |
| MYCN     | CTNNB1   |
| PSMB8    | TPM1     |
| NAGLU    | CTRL     |
| HSPB1    | ADRA2B   |
| SPP1     | CYBB     |
| DYRK1A   | SLC35G1  |
| CLU      | SLC30A8  |
| MYHAS    | S100A1   |
| NR3C1    | GREM2    |
| FGF8     | FBLN1    |
| HLA-A    | F13A1    |
| CEP104   | BHMT     |
| FN1      | F2       |
| CSF1     | BMP4     |
| HLA-DRB1 | SLC5A3   |
| GLI2     | SLC6A2   |
| GTF2I    | NCF1     |
| DYNC2I1  | EREG     |
| NEK9     | ERCC2    |
| IFT27    | ARHGAP9  |
| RAB3GAP1 | FBRS     |
| MT-ATP8  | SFRP5    |
| SLC2A2   | S100A4   |
| AAAS     | S100B    |
| AGTR1    | TSPAN31  |
| AGT      | SCD      |
| FBLN1    | NLRP1    |
| RAD21    | FGG      |
| GRIN2B   | FGF13    |
| RAG1     | BLK      |
| ABL1     | SELENOP  |
| CASR     | ALDH1A3  |
| HNF1A    | FAT1     |
| MYO5A    | BMPR1A   |
| KITLG    | SLC18A2  |

|          |           |
|----------|-----------|
| PRKD1    | SLC22A1   |
| NTHL1    | DOCK1     |
| TLR4     | STC1      |
| ETS1     | SULT1E1   |
| PAFAH1B1 | DNMT3B    |
| SLC52A2  | DNMT1     |
| ITPR1    | TAC1      |
| FANCA    | TACR3     |
| WNT10A   | AFM       |
| BMP6     | NQO1      |
| NDUFS4   | DHCR7     |
| FGF10    | MIR592    |
| RAB23    | DRD3      |
| FGF9     | PRSS55    |
| FOXC2    | ATN1      |
| YAP1     | SLC22A3   |
| FOXE1    | EPO       |
| C8orf37  | SNAI1     |
| ENPP1    | EPHB2     |
| DGUOK    | EPHA7     |
| EZR      | AHSG      |
| DCAF17   | EGR3      |
| STAT5B   | EDN2      |
| F2       | ABCA1     |
| FGF23    | SREBF2    |
| TTN      | SRF       |
| AHSG     | ADAMTS19  |
| MYH9     | BEST1     |
| KRT19    | PEA15     |
| MAX      | HSPB3     |
| NKX2-1   | SELENBP1  |
| ADCY6    | ACVR1     |
| HMGA2    | SORBS1    |
| GSTP1    | UCN2      |
| CALB2    | CECR      |
| MMP1     | CIB1      |
| DHX37    | CAP1      |
| ALK      | CDX2      |
| MVK      | ANGPTL1   |
| BIRC5    | CCT       |
| CYP1B1   | STUB1     |
| CDH3     | CBFA2T2   |
| EDAR     | POSTN     |
| CDC45    | IGF2BP2   |
| COQ8B    | TNFSF12   |
| CLIP2    | TCFL5     |
| CYP11B1  | CBS       |
| EIF2B4   | FGF19     |
| MSLN     | FADD      |
| IL1RN    | TNFRSF10B |
| CSF2     | POLD3     |
| ITGB3    | CCN4      |
| NFKB1    | HDAC3     |
| HDAC9    | CCK       |

|            |           |
|------------|-----------|
| NF2        | ARHGEF7   |
| ERCC3      | KHDRBS1   |
| PRKCA      | KHDRBS3   |
| E2F1       | CBSL      |
| AQP2       | SLC33A1   |
| PPP1CB     | BANCR     |
| CDC25A     | ROCK2     |
| EPO        | NR1H3     |
| NGF        | MIR3135B  |
| HERPUD1    | INSL5     |
| SCNN1A     | CD24      |
| PLAU       | CD59      |
| SUCLG1     | CD68      |
| PARP1      | GREB1     |
| THBS1      | CD69      |
| SPIDR      | USP34     |
| RPGRIP1    | PCLAF     |
| CD2AP      | BMS1      |
| EIF2B5     | TNFRSF8   |
| CSF1R      | FADS2     |
| TGFA       | ACVR2A    |
| KIF3A      | AKAP8     |
| ALPP       | CDKN1B    |
| HUWE1      | CDKN1A    |
| PIK3CG     | IL32      |
| TTC21B-AS1 | DHRS9     |
| PACS1      | ACVR2B    |
| WASL       | NAMPT     |
| LAMA3      | KL        |
| POLR3H     | FEM1B     |
| CTNNA2     | FTMT      |
| CEP164     | SFXN1     |
| PTH        | PGR-AS1   |
| MAOA       | ELM01     |
| CCR6       | PRDX3     |
| TFRC       | SERPINA12 |
| CTSD       | CPB2      |
| LCN2       | COX8A     |
| HSPD1      | DSCC1     |
| TIMP1      | PWRN2     |
| HGF        | DHRS11    |
| HOXD13     | LAP       |
| GPC4       | PPARGC1B  |
| WFDC2      | CALCA     |
| MIR19A     | SLC06A1   |
| TBL1XR1    | MAP3K8    |
| MIR199A1   | FZD3      |
| SP1        | COPA      |
| CD274      | SVEP1     |
| USF3       | CPT1A     |
| DGCR8      | AIR       |
| F3         | WFS1      |
| LOX        | WNT1      |
| ABCC1      | WNT5A     |

|           |           |
|-----------|-----------|
| NSDHL     | WNT8B     |
| SCT       | TMEM120B  |
| MIR143    | OR2AG1    |
| UFD1      | XK        |
| IGF2R     | XRCC1     |
| SLC12A2   | YWHAZ     |
| MIR17HG   | MKRN3     |
| CRH       | CSF3      |
| CTSB      | CREBBP    |
| GRN       | CPT2      |
| GREM1     | TMEM18    |
| CD34      | FLAD1     |
| MIR9-1    | CYP2R1    |
| PIBF1     | TADA1     |
| IL6ST     | LEAP2     |
| FBN2      | CASR      |
| IL4       | SLC5A11   |
| FANCD2    | SPZ1      |
| CD27      | C1QTNF3   |
| GDNF      | SORCS1    |
| AGPAT2    | GABARAP   |
| SIX5      | ATAD1     |
| ATP6VOA2  | LINC02605 |
| NUP93     | CHM       |
| ALX4      | INSL6     |
| CDKN3     | NROB2     |
| PIK3C2A   | CASP9     |
| CDK2      | NCOA4     |
| HDAC1     | PNPLA3    |
| DMRT3     | FGF23     |
| MIR4713HG | DRAM2     |
| PIRC66    | MAP1LC3B  |
| ILK       | CNP       |
| TNFAIP3   | NCOA3     |
| SELE      | NRIP1     |
| SYP       | SPPL3     |
| MLXIPL    | MRO       |
| TXNDC15   | IMMP2L    |
| BUB1      | CASP7     |
| TBL2      | BCAR3     |
| COL7A1    | GLIPR1    |
| AQP1      | BDNF      |
| AXIN1     | MMP1      |
| VCAM1     | MUC5AC    |
| GNAQ      | MUSK      |
| PTHLH     | FAS       |
| CLDN4     | SERPINC1  |
| NFKB2     | ATD       |
| LBR       | NBN       |
| COQ2      | HCG26     |
| DCLRE1C   | NFIC      |
| HFE       | CCN1      |
| TEK       | IGFBP6    |
| TKT       | IGFBP4    |

|           |          |
|-----------|----------|
| GGT1      | NHS      |
| AURKA     | NNMT     |
| RPS6KB1   | IL1R1    |
| TUBA1A    | IL2      |
| PDE6D     | ITGA2B   |
| RFC2      | ISG20    |
| HBA2      | MPG      |
| VWF       | MPO      |
| FAN1      | IRF1     |
| DMRT1     | MIR151A  |
| SLC6A4    | CXCL10   |
| MAGI2     | MIR335   |
| POU5F1    | MT1L     |
| KIAA0319L | IL11     |
| MIR106B   | IL7      |
| NDUFS8    | IL2RA    |
| PHB       | MTR      |
| FEN1      | NOS2     |
| FKBP10    | IGFBP2   |
| TFAP2B    | HSD17B13 |
| SMARCC2   | HSP90AA1 |
| DGCR5     | HSPB2    |
| PTK2      | INSIG2   |
| CCN2      | DCTN4    |
| OCIAD1    | HSPA9    |
| LIPE      | HSPA5    |
| SERPINC1  | HSPA4    |
| FBXW7     | HSPA1B   |
| SLC34A1   | PDE8A    |
| RBPJ      | PDGFRA   |
| HLA-DQB1  | IL23A    |
| BMP2      | GDE1     |
| NPPA      | PKD1     |
| CHEK1     | DNAJB1   |
| SHOX      | TAS2R13  |
| APP       | NOTCH3   |
| ADCY10    | NPPB     |
| HDAC4     | NANOS3   |
| MIR182    | ROR1     |
| ARMC5     | P2RY2    |
| CD4       | IDE      |
| TIMP2     | PAFAH1B1 |
| PRDM5     | PRDX1    |
| RHO       | APOC1    |
| LAMA5     | TNC      |
| FGF7      | HTR2C    |
| C4A       | PAPPA    |
| HMOX1     | PAX6     |
| MIR126    | PTRH2    |
| MIR141    | LUM      |
| CASP9     | FADS1    |
| MIR29A    | LGALS3   |
| GLIS2     | LCT      |
| STAT1     | MIR224   |

|          |                 |
|----------|-----------------|
| MIR140   | MIR23A          |
| PSEN1    | MIR23B          |
| NCAM1    | MIR25           |
| PIK3CD   | MIR26B          |
| HSPA5    | SUM01P1         |
| NODAL    | MIR28           |
| MIR22    | MIR29A          |
| PAPPA    | MIR29B1         |
| KL       | MIR29B2         |
| IFT20    | MIR203A         |
| QRICH1   | MIR200B         |
| ABCC8    | LYN             |
| HDAC6    | MIR106B         |
| WWTR1    | MIR130A         |
| LMNB2    | MIR130B         |
| ABCG2    | ARNTL           |
| PDSS2    | MIR142          |
| AGGF1    | CIMT            |
| MAPK14   | LRP5            |
| CEP250   | LPP             |
| MMP7     | MIR181A2        |
| PALLD    | MIR182          |
| KARS1    | MIR186          |
| CST3     | MIR19B1         |
| CRYAA    | MIR30C1         |
| VEGFC    | MIR30C2         |
| PSMB4    | LALBA           |
| TUBB     | GSTK1           |
| BMPR1B   | MCM2            |
| RPGR     | MCM7            |
| PRLR     | MDM2            |
| SERPINA3 | JUN             |
| ERBB4    | JAK2            |
| SMAD2    | ITK             |
| FLI1     | MAP3K4          |
| NQO1     | MEP1A           |
| CTTN     | ITGB5           |
| AFF4     | MELTF           |
| MYH11    | ITGB3           |
| MAPK8    | MIF             |
| SMARCAL1 | MC3R            |
| SMAD7    | ARSD            |
| HSP90AA1 | C1QL3           |
| GSK3B    | MAP3K15         |
| PROK2    | MIR99A          |
| SLC6A3   | TNFSF12-TNFSF13 |
| DRD2     | MAA             |
| TFAM     | LIN28B          |
| SPARC    | SMAD1           |
| NLGN3    | C1QTNF12        |
| PLA2G6   | SMAD4           |
| MIR93    | SMAD6           |
| TPO      | KNG1            |
| LHB      | MAGEA11         |



|           |          |
|-----------|----------|
| TOP2A     | AREG     |
| APOH      | MIP      |
| PCNA      | HSD17B4  |
| CFLAR     | SLC2A4RG |
| TNFRSF10B | MIR409   |
| LRPPRC    | MIR491   |
| SLC9A1    | SERBP1   |
| MUC5AC    | ARID1B   |
| SOD1      | SEMA6A   |
| RINT1     | CFAP97   |
| NBAS      | PRPF31   |
| HLA-G     | APPL1    |
| SGPL1     | GAPDH    |
| ATP2B3    | TRIB3    |
| CHGA      | RAD54B   |
| TNFRSF1B  | ZP4      |
| PTGS1     | NEGR1    |
| SLC25A1   | MIR451A  |
| MNX1      | GATA1    |
| CLDN3     | C2orf83  |
| NRG1      | FEM1C    |
| LRBA      | GGT1     |
| CXCL10    | PYY      |
| EIF2AK3   | CHPT1    |
| CUX1      | ADAMTS9  |
| IFT122    | GREM1    |
| DIABLO    | GCKR     |
| PLAT      | GCK      |
| PER2      | PTBP1    |
| ITGA6     | FGF21    |
| IFT57     | PTGDR    |
| ZFPM2     | FBX08    |
| HOTAIR    | ACTA1    |
| TNNT2     | SLC37A4  |
| PDE11A    | G6PC     |
| MALAT1    | FLNA     |
| TUBB3     | RNF6     |
| SYNGAP1   | RNU1-4   |
| IFT52     | GAS5     |
| ADD1      | ROCK1    |
| KRT14     | TAB2     |
| PLAUR     | MCF2L2   |
| MIR142    | RPL3     |
| PLIN1     | RPL36A   |
| BGLAP     | MIR483   |
| CCNE1     | FOXO3    |
| INHBA     | RPS6KB1  |
| CYP11B2   | RPS26    |
| PLEK      | FMR1     |
| EFEMP1    | RENBP    |
| CACNA1H   | PTBP2    |
| NCOA3     | NEIL2    |
| SCARF2    | RAB5B    |
| MT-TT     | RAC1     |

|          |          |
|----------|----------|
| SOX11    | FSHMD1A  |
| CALCA    | RAPSN    |
| LGALS3   | SGK3     |
| SMAD6    | RASA1    |
| CD79A    | NUP62    |
| PTH1R    | LGR6     |
| PAK4     | DICER1   |
| ITGAV    | BCL2A1   |
| CDT1     | PPP1R13B |
| HSD3B1   | ATF6     |
| LEMD3    | PDPK1    |
| XPA      | HLA-DQA1 |
| MIR25    | BCO1     |
| ARHGAP31 | PRKAG3   |
| IL6R     | PNN      |
| TBC1D20  | NANS     |
| RREB1    | ANXA5    |
| ECE1     | WNT4     |
| GAD1     | HAS3     |
| ITGB1    | HAS2     |
| CXCL1    | HAS1     |
| MRPS34   | PON2     |
| UMOD     | GYS2     |
| USP8     | CCHCR1   |
| CEP55    | PLAUR    |
| ST3GAL5  | HMGB2    |
| ITCH     | APEX1    |
| AIFM1    | ARID4B   |
| MIR30A   | SERPINF1 |
| SCN9A    | STK26    |
| CD8A     | ADA2     |
| LEF1     | PF4      |
| NRP1     | HRAS     |
| FAM20A   | PHB      |
| HSPA4    | HNF4A    |
| YBX1     | HMOX1    |
| HSPB2    | MIR30A   |
| CLUAP1   | PIK3R2   |
| PRODH    | HMGR     |
| SOCS3    | GTF2H1   |
| HOXA11   | PPARD    |
| MIR335   | GSTT1    |
| VANGL2   | TOR2A    |
| ACACA    | SGSM3    |
| NTS      | PRKAR2B  |
| SYK      | DESI1    |
| XIST     | HPGDS    |
| MIR125B1 | DMAP1    |
| SRA1     | MAPK1    |
| HPSE     | AGO2     |
| COQ6     | MAPK7    |
| NR2F1    | GIP      |
| SLPI     | GHR      |
| LIF      | PRLR     |

|           |          |
|-----------|----------|
| HADHA     | PROC     |
| CLTC      | GNAQ     |
| GCK       | GNB3     |
| CD28      | PPP1R12C |
| HSD17B1   | GSTM1    |
| NPPB      | PYCARD   |
| SIM1      | PPP1R3A  |
| DNAH11    | FLVCR1   |
| GNB3      | SLC47A1  |
| DDX59     | CTBP1-AS |
| GSTT1     | PPP5C    |
| IFI27     | PPT1     |
| MIR92A1   | OR10A4   |
| IL7       | GPR3     |
| CAVIN1    | MIOX     |
| NDUFB11   | ITLN1    |
| CREB1     | MMP26    |
| TSHR      |          |
| LPL       |          |
| GABBR2    |          |
| TIMP3     |          |
| DHH       |          |
| TRPV1     |          |
| CCNA2     |          |
| MIR99A    |          |
| ABCA4     |          |
| MC2R      |          |
| SERPINB5  |          |
| MIRLET7A1 |          |
| ACTC1     |          |
| GJB3      |          |
| PDGFA     |          |
| STAG2     |          |
| CBX2      |          |
| GNAI3     |          |
| DGCR11    |          |
| MICALL2   |          |
| ACVR2A    |          |
| CKAP2L    |          |
| NSMF      |          |
| ABHD5     |          |
| GADD45A   |          |
| IL1R1     |          |
| ZAP70     |          |
| FIG4      |          |
| HLA-C     |          |
| LOXL3     |          |
| IGFBP5    |          |
| SF3B1     |          |
| SOD2      |          |
| SMARCD1   |          |
| ZP3       |          |
| INS-IGF2  |          |
| BUD23     |          |

LEFTY2  
TNNI2  
STS  
HBEGF  
AREG  
CHRNA7  
HTT  
TULP1  
AMBP  
CFL1  
CYP3A4  
NDUFS2  
CD36  
SOX5  
PRF1  
ZNHIT3  
SH2B1  
PLK1  
EIF4EBP1  
TUBB2B  
CDX2  
PTPA  
RSP01  
STAT5A  
CLASP1  
CPT2  
CLN3  
CYB5A  
TNFSF11  
FSCN1  
TNNI3  
BTK  
MIR183  
CUL1  
HTR2A  
SGO1  
NPY  
NOS2  
MAPK10  
DNAH1  
SERPINB2  
PRSS8  
ACTG2  
SELP  
ABCA3  
ERCC6L2  
KCNN4  
SLC34A2  
MSX2  
PIP5K1C  
GDF3  
HSPA9  
CGB3  
RPE65

FOXP1  
PCSK1  
CAMP  
CRKL  
NRIP1  
USP7  
GHRH  
PRDM16  
EIF2AK2  
PTK2B  
TRIM21  
CTCF  
P4HB  
PECAM1  
NCOR1  
OPTN  
CLDN7  
ITGB4  
CDCA7  
EPRS1  
TET3  
IGFBP4  
RARA  
TRIP11  
CCND3  
ANGPT2  
PRPF8  
PSEN2  
SMARCAD1  
TACR3  
AQP3  
SLC30A7  
PSAP  
MIR24-1  
PCSK2  
VEGFD  
ANTXR1  
CX3CR1  
PDE8B  
SLC6A2  
IKZF1  
GDF1  
CEBPB  
RMI2  
HS6ST1  
HCRT  
CD24  
APLN  
ABCG5  
CDC25C  
BCL2L1  
FOXO3  
OXT  
REST

PLXNC1  
TF  
KLK10  
ID2  
FGF13  
PIGG  
CCL5  
SLC17A5  
RICTOR  
TPH1  
SSTR3  
BRD4  
ONECUT1  
COL17A1  
RPS20  
PLAG1  
MIR130B  
IL4R  
EPHX1  
MIR181A1  
HADHB  
TUG1  
FXD2  
XRCC1  
HOXB7  
HTR1A  
LPCAT2  
SSTR2  
CRB1  
RPA1  
FOXO1  
METTL8  
DNM1  
ZIC3  
MUC6  
FAM215A  
STAT2  
CRX  
PRKX  
IL5  
ABCA1  
COG4  
AIPL1  
AGO2  
PDE3A  
ECHS1  
CSNK2B  
KRT18  
EPPIN  
MTR  
IHH  
CDK5  
GAA  
MIR16-1

TSG101  
PGF  
LCA5  
CSNK1D  
HSD17B10  
DCN  
LTA  
RPS6KA1  
MUC2  
CYP2C9  
LIPC  
NR3C2  
CCK  
ITGA8  
BCAR1  
SFRP4  
HTRA1  
GRB2  
HMX1  
MIR132  
BAMBI  
IRF1  
MKI67  
GALNT17  
MIR15B  
FABP4  
SSTR5  
LDLR  
SAA1  
FERMT3  
HMGCR  
HES7  
ADGRG1  
CYP2D6  
RDH12  
ACHE  
UGCG  
XRCC5  
PDCD1  
ACP1  
CANX  
AKAP1  
CIDEA  
MOGS  
FANCL  
ATF2  
GPR101  
CTBP1  
BIRC6  
SAG  
H2AX  
TOX3  
CDH11  
FGF4

INHBB  
GDI1  
CEP83  
PLK4  
PRKAA2  
GZMB  
XDH  
SLC5A5  
POSTN  
SLC9A3R1  
TP53BP1  
RCC1L  
CGB7  
CDK10  
SRSF2  
JUP  
ARNTL  
SEC61B  
CLOCK  
GLS  
ACADM  
ANXA2  
ACVR1  
ACVRL1  
KRT17  
NEUROD1  
ZNF217  
SPRY4-IT1  
GALE  
CCL3  
KRT8  
LIG1  
PLXNA3  
PNPT1  
SPATA7  
MLANA  
ZP2  
CD19  
CRHR1  
DYNC1H1  
PRKAR1B  
TGIF1  
DHX34  
CETP  
SLC4A2  
PHKA2  
ITGAM  
PRKDC  
ACVR1B  
SOX8  
PPP3CA  
PXN  
LOC110408762  
CNTLN



FGFR4  
ODC1  
LMNB1  
MMP8  
IGFBP6  
IL15  
NR5A2  
MIRLET7B  
IMPDH1  
MCPH1  
MMUT  
KAT8  
ADM  
NHEJ1  
GSC  
PCM1  
KIF11  
CFAP300  
SELL  
CD63  
KNG1  
M6PR  
PKN2  
CA2  
RPS27A  
NONO  
UNC13D  
GDF15  
NR1H2  
NEDD4  
UBA1  
PDE4D  
CDK5RAP2  
NFATC1  
GJA4  
SERPINA6  
AIF1  
FMO3  
CPT1A  
AARS1  
ACAN  
CYP1A2  
SH2B3  
UBC  
TNFRSF11B  
MIR196A1  
MIR19B1  
TRH  
SERPINF1  
SLX4  
CDK20  
FZD4  
ANO6  
NEB

ANGPT1  
MIR203A  
ABCB11  
TRPC1  
TLR3  
MDC1  
HEY2  
SSTR1  
EMD  
G6PC1  
PRKACG  
NCOA4  
ABCB4  
LPIN1  
BUB3  
BMPR2  
NLRP5  
GPR161  
GRIA1  
APRT  
CCP110  
MB  
S100A9  
CEP97  
TMEM17  
LPA  
GCM2  
CSH1  
KRT1  
CNR1  
PIK3CB  
PKD1P6-NPIPP1  
ACE2  
LAMB1  
HNMT  
GALNT3  
CAT  
ADCY5  
MIR193B  
EML1  
PI4KB  
CXCR2  
DDB1  
EGR1  
CILK1  
TBX2  
AGTR2  
LTBP1  
PARK7  
DHDDS  
SYNE2  
HSD17B2  
CHI3L1  
KCNA5

MCM2  
DLL1  
ABCC6  
CPB2  
FJX1  
MEIS1  
RIPPLY3  
GDF2  
TACSTD2  
FDXR  
TENM3  
NEUROD2  
SMARCA5  
DBH  
MERTK  
PAX9  
RAPGEF3  
PTPN1  
NGFR  
SGK1  
AXL  
HAND2  
IL33  
IGF2BP2  
POC1B  
ITGA4  
PPP2R5D  
EPAS1  
WDR1  
UFSP2  
ABCA7  
HAAO  
LOC110806262  
PRKAR2B  
NR2F2  
FAT1  
DNAH9  
GAB1  
MTMR6  
TERF2  
CUL3  
PNPLA2  
NEDD4L  
CORIN  
PLD3  
PODXL  
CD9  
ZFPM2-AS1  
BDKRB2  
OTOA  
MSTN  
DRD3  
NEK2  
GUCY2D

PRKD3  
OPRM1  
IL11  
TUBB6  
ITGB6  
ACKR3  
ABCC3  
RPS6  
FAM161A  
BCHE  
HDAC5  
PDSS1  
UBB  
STUB1  
JAG2  
CD68  
ABHD11  
CEBPA  
CSH2  
BAG2  
RHEB  
MCM3  
CD200  
ALPK1  
UCP1  
SPAST  
CEP89  
FLAD1  
PGRMC1  
NFE2L2  
RAB3IP  
ACVR2B  
ATF4  
MAOB  
HYOU1  
STAG1  
GC  
RAB11A  
TAC3  
SCTR  
POC5  
NINL  
SLC30A8  
STON1-GTF2A1L  
MAPKAPK2  
GPBAR1  
CCDC88C  
SLC30A9  
ADAM12  
CHRNA4  
CENPC  
PRKACB  
YWHAZ  
CCN1

SEPTIN5  
DDC  
LTF  
POU1F1  
RAPGEF4  
AVPR1B  
DRD5  
GLMN  
XPO1  
LRP1B  
HNRNPA2B1  
TGFBR3  
PRKAA1  
CD163  
PLXNA1  
CD47  
RBX1  
LPP  
IQGAP1  
PLXNB2  
PMEL  
MGAM  
FOXJ1  
ADAM17  
CES1  
CYP2B6  
KIF24  
UBR5  
CDH13  
POLR1B  
FHL2  
IKBKB  
SET  
RBFOX1  
CCR3  
COL14A1  
MIR423  
COG2  
CNC2  
DCT  
APOC1  
TJP2  
HEY1  
ACADVL  
CEACAM3  
VCL  
TNFSF12  
EIF4E  
DSPP  
ATXN10  
RPTOR  
CYP27B1  
POU3F3  
SSH1

SDC1  
VRK2  
MAP2  
SLC4A4  
ALPG  
CYP3A7  
EME2  
BDKRB1  
STK36  
GHSR  
PHKG2  
HTR2C  
TACR1  
UBE2I  
OPRK1  
NOS1  
SMAD1  
NCOA2  
BIRC3  
SCARB1  
DCTN2  
CXCL11  
CXCR1  
APPL1  
SUMO1  
ISL1  
TNFRSF11A  
AKT1S1  
HIBCH  
MIR502  
MIR185  
IL23A  
IL34  
PF4  
GRIK2  
IDO1  
CROCC  
CHKA  
MLST8  
APOA4  
PLA2G4A  
YWHAQ  
HSP90B1  
ABCB7  
RIN1  
SOCS1  
TERF2IP  
BCL7B  
CAMK2G  
GFRA1  
LOC110006318  
PPIG  
DLG4  
MSMO1

FBP1  
HSD17B3  
TNS1  
TPM1  
ITGAL  
PC  
LCAT  
RAB5A  
RPS7  
NCR1  
ADAMTS9-AS1  
TUBG1  
NUCB2  
CDKAL1  
CD14  
LATS1  
GAL  
INPPL1  
HOXD9  
HEYL  
TBX6  
MYO1C  
PDP1  
MPDU1  
MTMR2  
HDAC3  
MRPS16  
TTC30B  
ANXA4  
MTNR1B  
HABP2  
CITED2  
WNT10B  
ARSA  
PRDM2  
COL4A2  
CEP20  
DRD1  
MIR27B  
WNT2B  
EEF1A1  
TJP1  
STOX1  
IL18R1  
WWP2  
MIR338  
NPAS2  
VAMP2  
HSD17B12  
NPC1  
ROCK1  
KIR2DS4  
KRT6A  
TOPBP1

UGT2B7  
ZBTB16  
KRT5  
DNASE1  
HDAC7  
LOC109623489  
ANGPTL4  
UCHL1  
USF1  
BMP7  
PRDX1  
PROK1  
UGGT1  
YWHAB  
ADCY3  
KCNJ16  
PPP1R3A  
LBP  
ANK3  
NR4A1  
GABRB2  
DVL2  
EARS2  
PGAP1  
MED15  
SRGAP1  
CX3CL1  
KRT10  
SFN  
TUBA1B  
SREBF2  
SCG5  
PDCD4  
PTGER2  
HPX  
SLC18A2  
PRKAR2A  
ANPEP  
ABHD11-AS1  
MIR199A2  
CLIP1  
REEP1  
RAD17  
MIR9-3  
PIFO  
PKM  
MAPK7  
HSPA8  
AKAP13  
SP100  
NR4A2  
FZD5  
STK4  
CA4



EEF1B2  
PDPK1  
CKB  
ITGA1  
IL16  
EXOSC9  
CHRNA2  
TUBB4A  
LNPEP  
CALB1  
STIL  
HTR2B  
HSPE1  
CMIP  
RPL3  
PDS5B  
HSPA1A  
GAS8  
GATA5  
SPTBN1  
CEACAM7  
DMBT1  
SERPINF2  
GHRHR  
RACK1  
FADS2  
MAP3K14  
IBSP  
TMEM165  
GRIA2  
PTPRG  
RANBP1  
NCL  
LOC110006317  
TIMELESS  
PRKAB1  
COL6A3  
OLR1  
XPNPEP3  
SLC29A2  
PSMB5  
MAP2K5  
STK11IP  
AFAP1  
AKAP6  
ALDH1A2  
AK9  
NCOA1  
HTRA2  
PTPRD  
GJB4  
GNPTG  
UCP3  
FUS

ARRB2  
GABRA4  
LGR6  
SLIT2  
GRM1  
SCD  
SLC22A4  
WARS2  
F11  
GSTA1  
ACTR3  
GPC1  
MIR125B2  
FGF18  
CXCL5  
HOXD12  
PRKCB  
UBD  
ADAMTS9  
ERVW-1  
MAD2L1  
DUSP13  
NPPC  
ABCA12  
MCHR1  
FBXO11  
MARK1  
MIR330  
DMRT2  
CRHR2  
RAB6A  
F13A1  
TCHP  
SERPINH1  
ARRB1  
PTN  
CHAF1A  
SMURF1  
PIP  
EDN2  
SGCB  
SMN1  
LMBRD1  
CRAT  
SLC5A3  
ALDOA  
GASK1B-AS1  
FGF19  
CYBA  
DLX2  
SLC8A1  
ACTR2  
PENK  
HOXD11

ADRA2B  
INPP5J  
MMP19  
HCST  
RB1CC1  
PTPRH  
EMX2  
LAMB3  
NCF1  
SULT1E1  
TRPC3  
ACAD9  
NEDD9  
GNAI1  
PON2  
GRB7  
RAB33B  
ACTN1  
CPS1  
ZNRF3  
PSMA3  
FBLN7  
NCR3  
DHRS11  
CPOX  
MUC7  
FDFT1  
STRA8  
PRKAG3  
SAR1A  
SRF  
USF2  
EIF2S1  
XPO5  
SFRP5  
CEP70  
CLCN7  
AVPR1A  
SLC4A1  
DNAJC6  
RAD54B  
RSAD2  
PRKCE  
AKAP8  
HSD17B13  
CYSLTR1  
CETN2  
PRKCZ  
TM7SF3  
IL37  
EYA3  
CES2  
MEF2A  
RRM2

MMP26  
CYP2A6  
ADH1B  
NUPR1  
TIA1  
C2orf69  
EIPR1  
ANKAR  
SCN7A  
FEM1A  
IL32  
DYNLL1  
SYNP02  
TUBB4B  
HAS1  
TPTE2  
NROB2  
DLX1  
PRIMPOL  
CDK12  
CKAP5  
PLIN3  
MNT  
TBC1D21  
CDC27  
ABCG8  
SYTL2  
TFAP2A-AS1  
ZNF142  
FDX1  
CCL20  
MEIOB  
SLC22A2  
PDYN  
FAAH  
GP2  
TRPV6  
OTUD4  
MLKL  
CCDC115  
GREB1  
HIVEP1  
PEBP1  
CHRNA3  
AKR1B1  
CCDC120  
PNPLA3  
AKR1C1  
UBE2D3  
SACM1L  
SULT1A1  
CABLES1  
LCT  
KLF11

HOXD3  
NEIL2  
SLC25A11  
HPGD  
PRKRA  
KIF19  
PDLIM5  
POLR3K  
PSMB2  
SGTA  
BCL2L2  
AKR1C2  
HHIP  
PGK1  
MTMR10  
RUNX1T1  
MIR574  
SHANK1  
NKX2-2  
PDXK  
IL21  
MAN2C1  
LOC117152610  
WAPL  
AQP9  
UGT2B4  
HCP5  
RPA2  
STRADB  
GPNMB  
TRAP1  
MBOAT2  
PTPRN  
HAS2  
UNC119B  
MAZ  
LATS2  
MARS2  
BMP10  
VEGFB  
MUC3A  
NOP2  
FOXL1  
FUT8  
HBZ  
PSMD1  
MAL  
FEV  
RFWD3  
MXD1  
EIF5A  
CDH24  
LOC110386951  
ESM1

CAPN1  
SLC2A6  
HTRA3  
PIGR  
NCK2  
SKP1  
INHBC  
LGR4  
GNA15  
PROC  
CBARP  
YWHAH  
IST1  
RNF4  
OPRD1  
PIKFYVE  
TRIM50  
P2RX7  
CDIPT  
TLK1  
ANKK1  
PLS3  
GTF3A  
TLN1  
SLC11A1  
LGR5  
MARK4  
GGCX  
HBQ1  
CCL22  
PSMC1  
RIF1  
SMAD5  
MSBP1  
CTNNAL1  
ZFP36L2  
INCENP  
RBKS  
TFPI  
ING5  
MARK3  
MTNR1A  
LCN1  
IRS4  
ANO1  
NRP2  
FNDC4  
UGT2A3  
RPUSD1  
PLIN2  
ENTPD1  
MEPE  
LMAN2L  
MRPL44

LRIG1  
RBM46  
NFAT5  
B4GALT6  
CHRNA2  
ENPEP  
SLC12A7  
EDC4  
KRCC1  
PRDX2  
ACOT11  
CD2  
ESPL1  
GBX2  
SCAP  
MIR186  
BCL7C  
SERPINB4  
REL  
AFM  
CPQ  
WWC1  
CHRNA5  
VAMP8  
EPHA7  
REG1A  
DEPTOR  
AP2B1  
ZNF350  
TRIP10  
TRPV5  
RXRA  
ZFH3  
TUBA4A  
VPS52  
LEFTY1  
ULK1  
BCO1  
ALPI  
UNC5C  
CALCRL  
TNFRSF17  
CSN1S1  
ACVR1C  
DNAJA3  
HAS3  
NAP1L1  
CCDC170  
AGPAT1  
CALCR  
PDE8A  
FMN2  
B3GALT4  
GDF11

NPSR1-AS1  
SMC2  
FLOT1  
SH3BP4  
ZNF23  
ANXA1  
ZNF274  
RNH1  
DLGAP1  
PAF1  
LAMC2  
ZNF318  
UGDH  
SLC22A3  
CRYZL1  
FA2H  
ACADL  
IL1R2  
NME2  
SERPINE2  
LZTS1  
MC3R  
SLC5A6  
GPAM  
USP48  
GNB4  
NBEAL1  
NPY2R  
CLCN3  
UTS2  
IGFL3  
PEA15  
KRT9  
ESYT1  
IVD  
RAB3IL1  
ORMDL1  
IGFBP7  
TUBB2A  
FAM124B  
ROCK2  
PLA2G10  
TOR2A  
GSTM3  
CYSLTR2  
SLIT3  
PROKR1  
CHP2  
FBXO31  
PTPN13  
DHRS9  
RASAL1  
TMEM120A  
TTC30A



MIR9-2  
STK26  
CETN1  
CXXC4  
ELOB  
SCAMP1  
RCN2  
LCLAT1  
TRPC4  
TXNIP  
BAIAP2L1  
IQGAP2  
RBL2  
HELQ  
LOC108783649  
CSMD1  
RCC1  
ARF6  
FGFR10P2  
HPR  
ATAD3B  
BST1  
CAMKK2  
COL16A1  
ENHO  
EPHX2  
MIS18BP1  
ATP1A1  
PDE4A  
GRK3  
IGKC  
TACC1  
COL8A1  
CLIC1  
RHOB  
PPP3R1  
BCKDK  
MIR136  
L2HGDH  
RAPH1  
RNF212  
DBI  
HTR5A  
SLC2A4RG  
PRKG2  
ANGPTL2  
ODF2  
LEPROTL1  
TMEM258  
TCL1A  
PSG1  
CHRNA4  
ABCC12  
LOC109029530

SLC9A3R2  
KRT13  
SFPQ  
NUP35  
E2F4  
NAGK  
ANKRD39  
MAGEA11  
PPA2  
EPHB2  
GOLGA5  
ADH4  
CCAR2  
TNFAIP6  
REV1  
EBF2  
SF1  
CENPA  
GLP1R  
ATP5F1B  
ADHFE1  
FAP  
FMO1  
FOLH1  
HBE1  
IGFALS  
IVL  
CAMK2D  
SNX1  
LUM  
ATG13  
NFXL1  
LY75  
HDLBP  
BABAM2  
TRIB3  
DNAJC14  
MGAT1  
USO1  
CLSPN  
KHDRBS3  
FOSL2  
ATP2A1  
TMPRSS11A  
NEK11  
PARD3B  
ZNF169  
NNMT  
ACP3  
SMPD3  
ETV7  
RAP2A  
SPNS1  
PRKCI

DDIT4  
BRD7  
TDP2  
C1QTNF12  
BCAR3  
DKK3  
SSTR4  
BMP5  
PRDX4  
DMWD  
MT3  
CHFR  
TRIB2  
SEC24B  
CARTPT  
HMOX2  
CIAPIN1  
IRF2  
PSMA2  
GDF7  
SLC12A4  
PIAS1  
SERPINA4  
FZD7  
NME3  
RNLS  
MIR760  
SLC39A10  
ITFG1  
TBC1D10C  
CD300LD  
PDIA2  
BANCR  
CHRNA3  
RRBP1  
TIMP4  
MIR16-2  
INSIG1  
RAP1GDS1  
MAP3K20  
EME1  
CST6  
RTN4  
TLR6  
CDK9  
KCTD13  
CST9L  
TSGA10  
KRT78  
TUBA3D  
CCDC92  
NFATC3  
NRBP1  
SLC30A6

TSN  
MPG  
RPL10L  
GUK1  
NEK4  
DOT1L  
MAML3  
SLC25A3  
SRI  
INTS9  
P2RY2  
CCNT2  
LOC110386947  
KDM3A  
CBR3  
ZFX  
NPNT  
EMILIN1  
CYP2R1  
PSMD11  
ARF3  
NDRG4  
LOC108863620  
LAT  
DDAH2  
DYNC1LI1  
RAB1A  
NMI  
DUSP2  
CCT4  
ACAD11  
AQP8  
APOF  
RXFP1  
CDC5L  
AVEN  
CXCL6  
D2HGDH  
SMC4  
TPBG  
SORBS2  
NPTN-IT1  
CHMP4B  
BTRC  
MIOX  
APLNR  
PSMB1  
STK3  
WNT8B  
ADCY7  
STARD7  
ASIC1  
UCN  
SMPD4

NPRL3  
CCNG2  
FYCO1  
NASP  
APLP1  
AKR1C4  
CAPZB  
PREB  
MIR218-1  
INTS6  
ZC3H18  
PPP1R7  
RPL7A  
C1QL3  
BMP3  
GALNT14  
ZP4  
TRADD  
TREH  
CXCL3  
DPH2  
ANGPTL1  
TUBA1C  
BCAS1  
CASC22  
LHX9  
UBA6  
DNAJC10  
ACKR2  
MARCHF7  
KLKB1  
MIR3940  
TNNI3K  
PDK1  
RSL1D1  
HAVCR1  
GNRHR2  
TMEM18  
DNAI7  
ECT2  
BCCIP  
TNIP2  
PLPPR3  
PKMYT1  
PRMT5  
SCD5  
B3GNT5  
NOP58  
PDXDC1  
PSMB3  
C19orf33  
EHBP1  
SLC20A1  
C2orf88

TMSB10  
RBBP7  
RAB36  
PDGFC  
MMADHC  
HGFAC  
CHRNA6  
SEMA4F  
LDHAL6A  
FAM136A  
BIN1  
PTTG2  
CNOT11  
RALB  
E2F6  
SGK3  
BCAT1  
MREG  
ORC2  
SETD7  
GPAT3  
NAB1  
TENT5A  
SHCBP1  
PIGF  
RAB3C  
EIF3C  
PSMA7  
AGA  
HNRNPD  
BANP  
ACOXL  
HES6  
IL36A  
BOD1L1  
PLAC1  
BCAR4  
SPEG  
GNPDA2  
GPAT4  
HNRNPD  
HSPA6  
GCSH  
NM  
EIF4A1  
DYNC1LI2  
CHRNA9  
ASTL  
PLPP1  
BPNT1  
TP53I3  
INPP4B  
DOK1  
CNNM3

RPL41  
C2CD6  
GULP1  
INSRR  
ADGRL3  
RPLP2  
RCHY1  
INHBE  
DUSP19  
DNAJA1  
TRIM2  
GORASP2  
PRPF4B  
GPR1  
TNIP3  
MAP3K2  
GALR2  
LRPAP1  
GALM  
ATG9A  
TMEFF2  
PIIF  
METRN  
FKBP7  
FARSB  
ATP5MF  
LIMS2  
CSE1L  
TCF7L1  
USP39  
LNPB  
HIF1AN  
NGEF  
CAPG  
CAP1  
EPHA5  
ASPHD1  
BAG6  
FAM98A  
FLOT2  
ZFP42  
UBXN4  
PGAM5  
PRPF19  
SUPT3H  
SMURF2  
MMRN1  
PTPN18  
SPC25  
MAP4K4  
ACTR1B  
GDE1  
USP10  
ACTR1A

NACA  
CCT8  
CCT7



GEO (GSE5850, GSE98421, GSE34526) Genes present in at least two databases

|               |         |
|---------------|---------|
| MMP9          | CYP19A1 |
| PLTP          | AKR1C3  |
| TAPBP         | STAR    |
| IL18RAP       | BCL2    |
| RP11-456P18.2 | HSD3B1  |
| FCGR1B        | FSHR    |
| KIAA0247      | LMNA    |
| FAM81A        | GNAS    |
| KCNA1         | GDF9    |
| ITGB2         | BMP15   |
| ADRB1         | INS     |
| ARAP3         | LEP     |
| TMEM176B      | HSD3B2  |
| NAPA          | LIF     |
| MYO10         | LHB     |
| SDHAF2        | RBP4    |
| TMEM130       | MMP2    |
| DR1           | AZGP1   |
| FCGR2A        | MTNR1B  |
| NAIP          | SRD5A1  |
| PCDH7         | GAB1    |
| FGF3          | CGB5    |
| UTS2B         | MALAT1  |
| KCNT2         | AKT2    |
| ZDHHC6        | AKR1C1  |
| ST6GALNAC5    | CLDN4   |
| CH25H         | PNPLA2  |
| B4GALT5       | TFRC    |
| TRHDE         | BAX     |
| SLITRK4       | TMEFF2  |
| THBD          | RRM2    |
| FABP5         | AKR1C2  |
| ASNA1         | TOP2A   |
| SPI1          | SCNN1A  |
| SLC13A4       | SCT     |
| IL6ST         | DLG4    |
| RP11-164P12.3 | BCL11A  |
| DDX52         | MAD2L1  |
| ZFHX4         | BLOC1S3 |
| CSHL1         | NRG1    |
| PBK           | LPCAT2  |
| XPC           | CEP55   |
| CDH19         | TRPV6   |
| SLC4A4        | CAMK2D  |
| RIMS4         | FGF18   |
| RAPH1         | IL34    |
| GPR25         | PGR     |
| TAGLN2        | RARRES2 |
| LOC101929118  | NR3C1   |
| FCER1G        | ADRB2   |
| VPS28         | CD36    |
| PVR           | ADRB3   |
| RAB3B         | NCOR1   |

BHMT  
LOC284379  
PLA2G7  
ATF7IP2  
POPDC3  
CLEC5A  
ZNF229  
SGPP1  
ESR1  
RNF11B  
NPIPA1  
C7  
SOCS3  
P2RX7  
LOC100506082  
PIP5K1B  
RP11-792A8.4  
PRKCI  
TMEM45A  
LOC389834  
TRIM68  
RNF213  
IL1RN  
C3AR1  
C11orf87  
RBM24  
NFKBIE  
MAMLD1  
ZNF510  
SDC3  
PRR15  
CD44  
OCIAD2  
LOC101927723  
HLA-DPA1  
LOC100505812  
REPS2  
ARL6IP4  
PRR16  
RELT  
FAM78B  
DVL3  
CCDC85B  
LOC541472  
LOC145945  
MAN1C1  
LINC01111  
CSRNP3  
CD163  
FAM26D  
NPC1L1  
ARNTL  
ISM1-AS1  
CACNG5

TH  
DENND1A  
INSR  
SLPI  
THADA  
NGFR  
LHCGR  
ATP5F1B  
PPARG  
YAP1  
PTEN  
AOPEP  
HNF1A  
ATM  
ERBB4  
LIPE  
HMGA2  
VCAN  
CBX2  
FOS  
CAV1  
SETD2  
PLIN1  
ERBB3  
SERPINE1  
AGPAT2  
IGF1  
BAZ1B  
AMH  
ANTXR2  
MAP3K1  
DHH  
IRS2  
MTHFR  
TBL2  
CRB1  
RFC2  
FST  
PRL  
FLT1  
IL6  
CDK2  
FBN3  
RETN  
CAPN10  
CORIN  
GTF2I  
LMNB2  
GCG  
STON1-GTF2A1L  
POR  
IL1B  
CAVIN1  
BSCL2

LOC100130744  
TTC32  
PABPC1L  
LOC646588  
CTSA  
ALOX12  
COL11A1  
FHOD1  
CBLN4  
NAP1L3  
UCHL5  
SH3RF1  
ELOF1  
WAS  
RINT1  
DNM1P35  
PYCARD  
CDO1  
SPRY1  
C1orf162  
TREM2  
LPPR4  
CTSE  
GATA6  
DAGLA  
PCDHB1  
ATG16L2  
LINC00238  
SNRNP70  
LOC100506851  
NINJ1  
GPR85  
LOC286190  
DENND4B  
NRN1  
TLR6  
WDFY4  
PPP2CB  
PODN  
AQP5  
DOLK  
UBE2M  
INHBA  
ZNF124  
LOC100507600  
ZFYVE16  
LINC01267  
ARHGAP33  
LOC101929591  
KRT2  
PLCXD3  
TPH2  
AGMAT  
TNFRSF11A

NR5A1  
PON1  
POMC  
IL1A  
SULT2A1  
ELN  
SOX5  
TGFB2  
SOX3  
KIF7  
FTO  
TNF  
CYP17A1  
ESR1  
CYP2B6  
SLC2A4  
ACE  
SOX9  
DMRT1  
CRP  
ZBTB16  
SRY  
WT1  
TCF7L2  
NROB1  
ALMS1  
GTF2IRD1  
CLIP2  
VEGFA  
LIMK1  
CYP11A1  
VDR  
ADIPOQ  
CIDEC  
MMP14  
IRS1  
MSX1  
AR  
STOX1  
PMEL  
SHBG  
ANGPTL8  
DPP4  
AMHR2  
KISS1  
IGF2  
TGFB1  
GLP1R  
CYP21A2  
HSD11B1  
LEPR  
GHRL  
IL10  
CXCL8

SCUBE3  
STON1  
C3  
MAN1A1  
LOC100996654  
OXR1  
NOTUM  
NEUROG2  
RP3-496C20.1  
ANO4  
TRAPPC1  
BC041363  
ATP13A2  
ZNF292  
NTN4  
LILRA2  
BRD7P3  
WNT5A  
RENBP  
RP3-507I15.2  
LAPTM5  
LOC100506929  
TNFSF14  
UBE2A  
FCGR1A  
VWDE  
GAREML  
BC113958  
EPHA7  
LINC00842  
KCNRG  
CTNNA3  
C1QTNF2  
KRT76  
DDAH1  
RACGAP1  
PHF21B  
CTSH  
MAP3K14-AS1  
GPAT2  
OR8D2  
HBZ  
PKM  
TPP1  
IGF2BP3  
MUC19  
C17orf99  
ABRA  
RNASE1  
BCL2A1  
ZNF667-AS1  
GPR158  
LAMP3  
AHCYL1

H6PD  
LDLR  
FSHB  
IL18  
ESR2  
PPARGC1A  
PIK3CG  
CYP1A1  
ADIPOR1  
PIK3CD  
PIK3CB  
PIK3CA  
MIR93  
APOA1  
APOB  
ICAM1  
GNRHR  
ADAMTS1  
SLC2A1  
EGF  
ALB  
CASP3  
KLK3  
IL1RN  
MMP9  
MC4R  
MAPK3  
PDCD4  
FOXO1  
PTH  
ACTB  
HSD17B6  
AKT1  
F5  
PCOS1  
CAT  
KISS1R  
ADIPOR2  
MTOR  
LPA  
ENPP1  
STK11  
STS  
GSK3B  
NGF  
PPARA  
HSD17B1  
GC  
GATA6  
INHA  
SMAD2  
HSD17B2  
NUCB2  
MIR27A

ETS2  
PAX3  
PLEKH01  
PTCH1  
RORB  
CYBA  
TRANK1  
HSPA5  
MAGEA4  
GRB14  
CPVL  
DEPTOR  
TSTD2  
CXCL17  
KIAA1549  
FCGR2C  
HHIP  
CTTNBP2  
SERPINI1  
CD14  
GHR  
TTLL2  
RP11-1L12.3  
DLGAP5  
GULP1  
ELTD1  
LOC100289495  
GPX3  
LOC101928099  
LOC100507388  
MIR17HG  
IFFO2  
CASP8  
JADE1  
FLRT3  
MFHAS1  
WISP1  
MRPS31  
LOC100507006  
REL  
FOSL2  
THEMIS  
MYLK4  
ZCCHC14  
LOC101929019  
IFITM2  
UPP1  
SHISA2  
GAS7  
RP11-157E16.1  
DDX11-AS1  
DTD2  
RP11-1017G21.4  
HCLS1

MIR155  
SMAD3  
LCN2  
APOE  
ENHO  
KCNJ11  
IFNG  
MIR223  
ITGAX  
IGFBP1  
STAT3  
MIR486-1  
MAPK8  
AGTR2  
CFTR  
PRKAA2  
GPT  
CNR1  
AGT  
PLA2G7  
SIRT1  
PCSK9  
PROK1  
HAMP  
FN1  
PTGS2  
BGLAP  
FAAH  
SOD2  
SOCS3  
VCAM1  
ACACA  
BMP6  
CCL2  
HLA-DRB1  
UCP2  
TP53  
ADA  
FBN1  
HSD11B2  
APLN  
EGFR  
CCND2  
HOXA10  
HMGB1  
MECP2  
BMPR2  
SMAD7  
MIR200C  
SRD5A2  
SPARC  
SPP1  
SREBF1  
ZNF217

FGF7  
GC  
FOXO4  
PCSK6  
EQTN  
SLITRK5  
LOC613266  
CNKSR3  
NUTM2A-AS1  
FHL1

MTSS1L  
DUSP21  
KDM4D  
LINCO0298  
SERPINB5  
LHFPL3  
LOC101929224  
TM4SF1  
CXCL2  
AMOTL2  
AK5  
CXCL3  
NR3C2  
CDH12  
MARVELD3  
SOX5  
NADK2  
SNX10  
C20orf202  
EFS  
CCR1  
FGF5  
NDUFA1  
RP11-495P10.9  
ZNF367  
PDE5A  
FAM65B  
SOHLH2  
CAP2  
AHR  
INSC  
LOC101928211  
SLC44A5  
CTH  
ZNF595

SUOX  
TBC1D4  
MIR21  
CAPN5  
VIM  
MIR146A  
MIR145  
MIR222  
TAC3  
MIR320A  
1-Mar PIK3R1  
MIR33B  
WNT2B  
TGFBFR1  
TLR4  
MIR141  
MEF2A  
PAEP  
PTPA  
NPPC  
NOTCH1  
FEM1A  
PRKAA1  
PRKAB1  
AVP  
CDKAL1  
PKD1  
PLAT  
PCSK1  
PCNA  
SERPINB2  
NOS3  
MIR323A  
SET  
SFRP4  
SGTA  
KITLG  
REN  
RUNX2  
ATF4  
PTX3  
RB1  
MTNR1A  
MUC1  
TOX3  
INHBA  
GATA4  
EDN1  
AGTR1  
COMT  
HSPA1A  
ZNRD2  
PRDX4  
ADM

GPX3  
HSPB1  
EPHX1  
IAPP  
INSL3  
AGER  
GH1  
APRT  
ACAN  
AQP8  
CYP1B1  
IFI27  
DCN  
AQP7  
MSTN  
CGA  
INHBB  
CGB3  
IL17A  
ANGPTL2  
HIF1A  
HP  
RAD50  
AKR1B1  
NR4A1  
HHEX  
HLA-A  
MMRN1  
LPL  
AQP9  
CCN2  
HOTAIR  
LOX  
FGF2  
FABP4  
FABP1  
F3  
LPIN1  
THBS1  
TFAM  
TFAP2A  
TIMP1  
DBH  
C3  
ANGPTL6  
TNFAIP3  
TNFRSF1B  
CYP3A7  
CYP11B1  
TM4SF4  
TIMP3  
TIMP4  
TLR2  
CTLA4

CTNNB1  
TPM1  
ADRA2B  
SLC30A8  
FBLN1  
F13A1  
F2  
BMP4  
SLC5A3  
SLC6A2  
NCF1  
EREG  
SFRP5  
SCD  
FGF13  
ALDH1A3  
FAT1  
BMPR1A  
SLC18A2  
SLC22A1  
STC1  
SULT1E1  
TACR3  
AFM  
NQO1  
MIR592  
DRD3  
SLC22A3  
EPO  
EPHB2  
EPHA7  
AHSG  
EDN2  
ABCA1  
SREBF2  
SRF  
PEA15  
ACVR1  
SORBS1  
CECR  
CAP1  
CDX2  
ANGPTL1  
STUB1  
POSTN  
IGF2BP2  
TNFSF12  
FGF19  
TNFRSF10B  
HDAC3  
CCK  
KHDRBS3  
BANCR  
ROCK2



NR1H3  
INSL5  
CD24  
CD68  
GREB1  
USP34  
FADS2  
ACVR2A  
AKAP8  
CDKN1B  
CDKN1A  
IL32  
DHRS9  
ACVR2B  
NAMPT  
KL  
FEM1B  
SERPINA12  
CPB2  
PWRN2  
DHRS11  
CALCA  
COPA  
CPT1A  
WFS1  
WNT5A  
WNT8B  
XK  
XRCC1  
YWHAZ  
CSF3  
CPT2  
TMEM18  
FLAD1  
CYP2R1  
LEAP2  
CASR  
C1QTNF3  
SORCS1  
NROB2  
CASP9  
NCOA4  
PNPLA3  
FGF23  
NCOA3  
NRIP1  
IMMP2L  
BCAR3  
BDNF  
MMP1  
MUC5AC  
FAS  
SERPINC1  
ATD

NBN  
NFIC  
CCN1  
IGFBP6  
IGFBP4  
NHS  
NNMT  
IL1R1  
IL2  
MPG  
IRF1  
MIR151A  
CXCL10  
MIR335  
IL11  
IL7  
MTR  
NOS2  
IGFBP2  
HSD17B13  
HSP90AA1  
HSPB2  
INSIG2  
HSPA9  
HSPA5  
HSPA4  
PDE8A  
PDGFRA  
IL23A  
GDE1  
PDK1  
NOTCH3  
NPPB  
P2RY2  
IDE  
PAFAH1B1  
PRDX1  
APOC1  
HTR2C  
PAPPA  
PAX6  
LUM  
FADS1  
LGALS3  
LCT  
MIR23A  
MIR23B  
MIR25  
SUMO1P1  
MIR29A  
MIR203A  
MIR200B  
MIR106B  
MIR130B

ARNTL  
MIR142  
LRP5  
LPP  
MIR182  
MIR186  
MIR19B1  
MIR30C1  
MIR30C2  
MCM2  
MDM2  
JUN  
JAK2  
MEP1A  
ITGB3  
MIF  
MC3R  
C1QL3  
MIR99A  
SMAD1  
C1QTNF12  
SMAD4  
SMAD6  
KNG1  
MAGEA11  
AREG  
HSD17B4  
SLC2A4RG  
ARID1B  
APPL1  
GAPDH  
TRIB3  
RAD54B  
ZP4  
GGT1  
PYY  
ADAMTS9  
GREM1  
GCK  
FGF21  
FLNA  
GAS5  
ROCK1  
MCF2L2  
RPL3  
MIR483  
FOXO3  
RPS6KB1  
FMR1  
NEIL2  
RAB5B  
SGK3  
RASA1  
LGR6

DICER1  
PDPK1  
BCO1  
PRKAG3  
ANXA5  
WNT4  
HAS3  
HAS2  
HAS1  
PON2  
PLAUR  
SERPINF1  
STK26  
ADA2  
PF4  
HRAS  
PHB  
HNF4A  
HMOX1  
MIR30A  
PIK3R2  
HMGR  
PPARD  
GSTT1  
TOR2A  
PRKAR2B  
MAPK1  
AGO2  
MAPK7  
GIP  
GHR  
PRLR  
PROC  
GNAQ  
GNB3  
GSTM1  
PPP1R3A  
CTBP1-AS  
MIOX  
ITLN1  
MMP26  
IGFBP3  
MT-TL1  
PBX1  
FNDC5  
CHIT1  
LEPQTL1  
MIR135A1  
GPER1  
MIR486-2  
PEPD  
IGF1R  
PKHD1  
MSH2

MSH6  
CEP290  
CC2D2A  
ERCC6  
FGFR2  
OFD1  
MKS1  
BLM  
KCNQ1  
NPHP3  
FOXL2  
RPGRIP1L  
BBS1  
BBS10  
BBS4  
MKKS  
ATRX  
BBS2  
BBS12  
FGFR1  
NPHP1  
COL3A1  
BBS5  
NOTCH2  
TCTN2  
BBS9  
BBS7  
UBE3A  
FRAS1  
NPHP4  
NRAS  
ZEB2  
SDCCAG8  
NOBOX  
UGT1A1  
WDPCP  
HSPG2  
SOS1  
PREPL  
NRXN1  
CASP10  
COL5A2  
EIF2B2  
FIGLA  
H19  
AKT3  
CASP8  
CD40LG  
DGCR2  
DNMT3A  
LRP2  
AFP  
CHRNA1  
ANOS1

SATB2  
PKD1L1  
CDC73  
HPRT1  
SCN1A  
RAB3GAP2  
BCL2L1  
CYLD  
ESS2  
DCTN1  
ENG  
DVL1  
ZMPSTE24  
MPV17  
KDR  
NSD2  
CXCR4  
MYCN  
CEP104  
GLI2  
RAB3GAP1  
C8orf37  
DGUOK  
DCAF17  
BIRC5  
EIF2B4  
E2F1  
PPP1CB  
SUCLG1  
EIF2B5  
WASL  
HOXD13  
GPC4  
CD274  
CRH  
IL6ST  
IL4  
LBR  
HFE  
TKT  
DGCR5  
OCIAD1  
HLA-DQB1  
CD4  
TIMP2  
FGF7  
WWTR1  
PSMB4  
BMPR1B  
DRD2  
SLC9A1  
SOD1  
NBAS  
HLA-G

EIF2AK3  
CCNE1  
SOX11  
XPA  
IL6R  
ST3GAL5  
HOXA11  
XIST  
MIR125B1  
SRA1  
HADHA  
CD28  
DDX59  
TRPV1  
GNAI3  
DGCR11  
CKAP2L  
SF3B1  
BUD23  
PRF1  
TNFSF11  
NPY  
ACTG2  
EIF2AK2  
PECAM1  
CDCA7  
TET3  
PSAP  
ANTXR1  
HCRT  
GALNT17  
SAA1  
FERMT3  
PDCD1  
GZMB  
XDH  
RCC1L  
ODC1  
MMP8  
GDF15  
GJA4  
SH2B3  
TNFRSF11B  
ANGPT1  
S100A9  
CHI3L1  
RIPPLY3  
IL33  
HAAO  
TGFB3  
CD163  
MGAM  
POLR1B  
MIR423

POU3F3  
TNFRSF11A  
APOA4  
PLA2G4A  
HSP90B1  
SOCS1  
RAB5A  
MIR27B  
KIR2DS4  
UGT2B7  
ANGPTL4  
LBP  
CX3CL1  
MIR125B2  
MMP19  
STRA8  
PLIN3  
SLC22A2  
MIR574  
ESM1  
INHBC  
SMAD5  
ZFP36L2  
UTS2  
TXNIP  
ARF6  
COL8A1  
MIR136  
NFXL1  
ETV7  
CARTPT  
SERPINA4  
MIR760  
APLNR  
PIGF  
USP10  
BSND  
MDS2  
PKP1  
PRG4  
USH2A  
RACGAP1  
PBK  
CD44  
FCGR1B  
FCGR1A  
BHMT  
RENBP  
BCL2A1  
PYCARD  
PTCH1  
PAX3  
THBD  
MIR17HG



RINT1  
SERPINB5  
NR3C2  
SLC4A4  
CD14  
PKM  
CYBA  
HHIP  
HBZ  
P2RX7  
REL  
DEPTOR  
RAPH1  
FOSL2  
PRKCI  
TLR6  
CXCL3  
GULP1  
ATP13A2  
COL11A1  
OCIAD2  
WAS
