# Supplementary material for: Identification of Bioactive Compounds and Potential Mechanisms of Kuntai Capsule in the Treatment of Polycystic Ovary Syndrome by Integrating Network Pharmacology and Bioinformatics
Source: Hindawi journal article supplement (doi:10.1155/2022/3145938), 2022-01-01
Supplement: f4 [file 3145938.f4.pdf]

PGR  
NR3C2  
IL6R  
CD14  
LBP  
PTGS2  
HSP90AA1  
ADRB2  
BCL2  
BAX  
CASP9  
JUN  
CASP3  
CASP8  
PON1  
NOS2  
AR  
PPARG  
DPP4  
F2  
SLC6A2  
TOP2A  
AKT1  
MAPK8  
MMP1  
HMOX1  
NPPB  
CYP1A1  
ICAM1  
VCAM1  
CYP1B1  
HAS2  
SLC2A4  
GSTM1  
AKR1C3  
SLPI  
ESR1  
ESR2  
CDK2  
AKR1B1  
EGFR  
BCL2L1  
FOS  
CDKN1A  
MMP2  
MMP9  
MAPK1  
RB1  
TP53  
ODC1  
SOD1  
HIF1A  
HSPA5  
ACACA

CAV1  
F3  
IL1B  
CCL2  
CXCL8  
BIRC5  
NOS3  
HSPB1  
PLAT  
THBD  
SERPINE1  
IFNG  
IL1A  
NCF1  
NQO1  
COL3A1  
CLDN4  
PPARA  
PPARD  
CXCL10  
SPP1  
RUNX2  
E2F1  
IGFBP3  
IGF2  
CD40LG  
IRF1  
ERBB3  
RASA1  
CYP19A1  
GSK3B  
KDR  
FN1  
FOSL2
