# Supplementary material for: Identification of Bioactive Compounds and Potential Mechanisms of Kuntai Capsule in the Treatment of Polycystic Ovary Syndrome by Integrating Network Pharmacology and Bioinformatics
Source: Hindawi journal article supplement (doi:10.1155/2022/3145938), 2022-01-01
Supplement: f5 [file 3145938.f5.pdf]

PPI network

| node1  | node2    | node1_str node2_string_id     |
|--------|----------|-------------------------------|
| ADRB2  | IL1B     | 9606.ENSF9606.ENSP00000263341 |
| ADRB2  | EGFR     | 9606.ENSF9606.ENSP00000275493 |
| ADRB2  | F2       | 9606.ENSF9606.ENSP00000308541 |
| AKR1B1 | AKR1C3   | 9606.ENSF9606.ENSP00000369927 |
| AKR1C3 | AR       | 9606.ENSF9606.ENSP00000363822 |
| AKR1C3 | CYP1A1   | 9606.ENSF9606.ENSP00000369050 |
| AKR1C3 | CYP1B1   | 9606.ENSF9606.ENSP00000478561 |
| AKR1C3 | CYP19A1  | 9606.ENSF9606.ENSP00000379683 |
| AKT1   | MAPK1    | 9606.ENSF9606.ENSP00000215832 |
| AKT1   | HMOX1    | 9606.ENSF9606.ENSP00000216117 |
| AKT1   | MMP2     | 9606.ENSF9606.ENSP00000219070 |
| AKT1   | SERPINE1 | 9606.ENSF9606.ENSP00000223095 |
| AKT1   | CCL2     | 9606.ENSF9606.ENSP00000225831 |
| AKT1   | HSPB1    | 9606.ENSF9606.ENSP00000248553 |
| AKT1   | ICAM1    | 9606.ENSF9606.ENSP00000264832 |
| AKT1   | ERBB3    | 9606.ENSF9606.ENSP00000267101 |
| AKT1   | RB1      | 9606.ENSF9606.ENSP00000267163 |
| AKT1   | TP53     | 9606.ENSF9606.ENSP00000269305 |
| AKT1   | SOD1     | 9606.ENSF9606.ENSP00000270142 |
| AKT1   | NCF1     | 9606.ENSF9606.ENSP00000289473 |
| AKT1   | BAX      | 9606.ENSF9606.ENSP00000293288 |
| AKT1   | VCAM1    | 9606.ENSF9606.ENSP00000294728 |
| AKT1   | NOS3     | 9606.ENSF9606.ENSP00000297494 |
| AKT1   | BCL2L1   | 9606.ENSF9606.ENSP00000302564 |
| AKT1   | FOS      | 9606.ENSF9606.ENSP00000306245 |
| AKT1   | CXCL8    | 9606.ENSF9606.ENSP00000306512 |
| AKT1   | CASP3    | 9606.ENSF9606.ENSP00000311032 |
| AKT1   | SLC2A4   | 9606.ENSF9606.ENSP00000320935 |
| AKT1   | HSPA5    | 9606.ENSF9606.ENSP00000324173 |
| AKT1   | GSK3B    | 9606.ENSF9606.ENSP00000324806 |
| AKT1   | NOS2     | 9606.ENSF9606.ENSP00000327251 |
| AKT1   | CASP9    | 9606.ENSF9606.ENSP00000330237 |
| AKT1   | HSP90AA  | 9606.ENSF9606.ENSP00000335153 |
| AKT1   | CAV1     | 9606.ENSF9606.ENSP00000339191 |
| AKT1   | ESR2     | 9606.ENSF9606.ENSP00000343925 |
| AKT1   | E2F1     | 9606.ENSF9606.ENSP00000345571 |
| AKT1   | FN1      | 9606.ENSF9606.ENSP00000346839 |
| AKT1   | CASP8    | 9606.ENSF9606.ENSP00000351273 |
| AKT1   | PTGS2    | 9606.ENSF9606.ENSP00000356438 |
| AKT1   | CD40LG   | 9606.ENSF9606.ENSP00000359663 |
| AKT1   | JUN      | 9606.ENSF9606.ENSP00000360266 |
| AKT1   | RUNX2    | 9606.ENSF9606.ENSP00000360493 |
| AKT1   | MMP9     | 9606.ENSF9606.ENSP00000361405 |
| AKT1   | AR       | 9606.ENSF9606.ENSP00000363822 |
| AKT1   | IGFBP3   | 9606.ENSF9606.ENSP00000370473 |
| AKT1   | SPP1     | 9606.ENSF9606.ENSP00000378517 |
| AKT1   | BCL2     | 9606.ENSF9606.ENSP00000381185 |
| AKT1   | CDKN1A   | 9606.ENSF9606.ENSP00000384849 |
| AKT1   | IGF2     | 9606.ENSF9606.ENSP00000391826 |
| AKT1   | ESR1     | 9606.ENSF9606.ENSP00000405330 |
| AKT1   | HIF1A    | 9606.ENSF9606.ENSP00000437955 |
| AR     | MAPK1    | 9606.ENSF9606.ENSP00000215832 |
| AR     | ERBB3    | 9606.ENSF9606.ENSP00000267101 |
| AR     | RB1      | 9606.ENSF9606.ENSP00000267163 |
| AR     | TP53     | 9606.ENSF9606.ENSP00000269305 |
| AR     | EGFR     | 9606.ENSF9606.ENSP00000275493 |

|        |          |                               |
|--------|----------|-------------------------------|
| AR     | BCL2L1   | 9606.ENSF9606.ENSPO0000302564 |
| AR     | CASP3    | 9606.ENSF9606.ENSPO0000311032 |
| AR     | GSK3B    | 9606.ENSF9606.ENSPO0000324806 |
| AR     | PGR      | 9606.ENSF9606.ENSPO0000325120 |
| AR     | HSP90AA1 | 9606.ENSF9606.ENSPO0000335153 |
| AR     | CAV1     | 9606.ENSF9606.ENSPO0000339191 |
| AR     | NR3C2    | 9606.ENSF9606.ENSPO0000350815 |
| AR     | CASP8    | 9606.ENSF9606.ENSPO0000351273 |
| AR     | JUN      | 9606.ENSF9606.ENSPO0000360266 |
| AR     | RUNX2    | 9606.ENSF9606.ENSPO0000360493 |
| AR     | MMP9     | 9606.ENSF9606.ENSPO0000361405 |
| AR     | CYP19A1  | 9606.ENSF9606.ENSPO0000379683 |
| AR     | MAPK8    | 9606.ENSF9606.ENSPO0000378974 |
| BAX    | TP53     | 9606.ENSF9606.ENSPO0000269305 |
| BAX    | CASP8    | 9606.ENSF9606.ENSPO0000351273 |
| BAX    | CASP9    | 9606.ENSF9606.ENSPO0000330237 |
| BAX    | CASP3    | 9606.ENSF9606.ENSPO0000311032 |
| BAX    | MAPK8    | 9606.ENSF9606.ENSPO0000378974 |
| BAX    | BCL2     | 9606.ENSF9606.ENSPO0000381185 |
| BAX    | BCL2L1   | 9606.ENSF9606.ENSPO0000302564 |
| BCL2   | MAPK1    | 9606.ENSF9606.ENSPO0000215832 |
| BCL2   | TP53     | 9606.ENSF9606.ENSPO0000269305 |
| BCL2   | SOD1     | 9606.ENSF9606.ENSPO0000270142 |
| BCL2   | BCL2L1   | 9606.ENSF9606.ENSPO0000302564 |
| BCL2   | CASP3    | 9606.ENSF9606.ENSPO0000311032 |
| BCL2   | CASP8    | 9606.ENSF9606.ENSPO0000351273 |
| BCL2   | MAPK8    | 9606.ENSF9606.ENSPO0000378974 |
| BCL2   | ESR1     | 9606.ENSF9606.ENSPO0000405330 |
| BCL2L1 | MAPK1    | 9606.ENSF9606.ENSPO0000215832 |
| BCL2L1 | CDK2     | 9606.ENSF9606.ENSPO0000266970 |
| BCL2L1 | TP53     | 9606.ENSF9606.ENSPO0000269305 |
| BCL2L1 | CXCL8    | 9606.ENSF9606.ENSPO0000306512 |
| BCL2L1 | CASP3    | 9606.ENSF9606.ENSPO0000311032 |
| BCL2L1 | CASP9    | 9606.ENSF9606.ENSPO0000330237 |
| BCL2L1 | MAPK8    | 9606.ENSF9606.ENSPO0000378974 |
| BCL2L1 | CASP8    | 9606.ENSF9606.ENSPO0000351273 |
| BIRC5  | CDK2     | 9606.ENSF9606.ENSPO0000266970 |
| BIRC5  | TP53     | 9606.ENSF9606.ENSPO0000269305 |
| BIRC5  | RASA1    | 9606.ENSF9606.ENSPO0000274376 |
| BIRC5  | CASP3    | 9606.ENSF9606.ENSPO0000311032 |
| BIRC5  | CASP9    | 9606.ENSF9606.ENSPO0000330237 |
| BIRC5  | TOP2A    | 9606.ENSF9606.ENSPO0000411532 |
| CASP3  | MAPK1    | 9606.ENSF9606.ENSPO0000215832 |
| CASP3  | HMOX1    | 9606.ENSF9606.ENSPO0000216117 |
| CASP3  | HSPB1    | 9606.ENSF9606.ENSPO0000248553 |
| CASP3  | IL1B     | 9606.ENSF9606.ENSPO0000263341 |
| CASP3  | CDK2     | 9606.ENSF9606.ENSPO0000266970 |
| CASP3  | RB1      | 9606.ENSF9606.ENSPO0000267163 |
| CASP3  | TP53     | 9606.ENSF9606.ENSPO0000269305 |
| CASP3  | EGFR     | 9606.ENSF9606.ENSPO0000275493 |
| CASP3  | NOS3     | 9606.ENSF9606.ENSPO0000297494 |
| CASP3  | MMP9     | 9606.ENSF9606.ENSPO0000361405 |
| CASP3  | HSPA5    | 9606.ENSF9606.ENSPO0000324173 |
| CASP3  | JUN      | 9606.ENSF9606.ENSPO0000360266 |
| CASP3  | MAPK8    | 9606.ENSF9606.ENSPO0000378974 |
| CASP3  | CASP9    | 9606.ENSF9606.ENSPO0000330237 |
| CASP3  | CDKN1A   | 9606.ENSF9606.ENSPO0000384849 |
| CASP3  | CASP8    | 9606.ENSF9606.ENSPO0000351273 |

|        |          |                               |
|--------|----------|-------------------------------|
| CASP8  | MAPK1    | 9606.ENSF9606.ENSPO0000215832 |
| CASP8  | IL1B     | 9606.ENSF9606.ENSPO0000263341 |
| CASP8  | TP53     | 9606.ENSF9606.ENSPO0000269305 |
| CASP8  | EGFR     | 9606.ENSF9606.ENSPO0000275493 |
| CASP8  | CD14     | 9606.ENSF9606.ENSPO0000304236 |
| CASP8  | COL3A1   | 9606.ENSF9606.ENSPO0000304408 |
| CASP8  | HSPA5    | 9606.ENSF9606.ENSPO0000324173 |
| CASP8  | CASP9    | 9606.ENSF9606.ENSPO0000330237 |
| CASP8  | HSP90AA  | 9606.ENSF9606.ENSPO0000335153 |
| CASP8  | MAPK8    | 9606.ENSF9606.ENSPO0000378974 |
| CASP9  | MAPK1    | 9606.ENSF9606.ENSPO0000215832 |
| CASP9  | TP53     | 9606.ENSF9606.ENSPO0000269305 |
| CASP9  | MAPK8    | 9606.ENSF9606.ENSPO0000378974 |
| CASP9  | JUN      | 9606.ENSF9606.ENSPO0000360266 |
| CAV1   | KDR      | 9606.ENSF9606.ENSPO0000263923 |
| CAV1   | TP53     | 9606.ENSF9606.ENSPO0000269305 |
| CAV1   | EGFR     | 9606.ENSF9606.ENSPO0000275493 |
| CAV1   | PPARG    | 9606.ENSF9606.ENSPO0000287820 |
| CAV1   | NOS3     | 9606.ENSF9606.ENSPO0000297494 |
| CAV1   | GSK3B    | 9606.ENSF9606.ENSPO0000324806 |
| CAV1   | HSP90AA  | 9606.ENSF9606.ENSPO0000335153 |
| CAV1   | PTGS2    | 9606.ENSF9606.ENSPO0000356438 |
| CAV1   | ESR1     | 9606.ENSF9606.ENSPO0000405330 |
| CCL2   | MAPK1    | 9606.ENSF9606.ENSPO0000215832 |
| CCL2   | HMOX1    | 9606.ENSF9606.ENSPO0000216117 |
| CCL2   | MMP2     | 9606.ENSF9606.ENSPO0000219070 |
| CCL2   | SERPINE1 | 9606.ENSF9606.ENSPO0000223095 |
| CCL2   | IL1A     | 9606.ENSF9606.ENSPO0000263339 |
| CCL2   | IL6R     | 9606.ENSF9606.ENSPO0000357470 |
| CCL2   | TP53     | 9606.ENSF9606.ENSPO0000269305 |
| CCL2   | F3       | 9606.ENSF9606.ENSPO0000334145 |
| CCL2   | CD40LG   | 9606.ENSF9606.ENSPO0000359663 |
| CCL2   | IFNG     | 9606.ENSF9606.ENSPO0000229135 |
| CCL2   | FN1      | 9606.ENSF9606.ENSPO0000346839 |
| CCL2   | SPP1     | 9606.ENSF9606.ENSPO0000378517 |
| CCL2   | MAPK8    | 9606.ENSF9606.ENSPO0000378974 |
| CCL2   | MMP9     | 9606.ENSF9606.ENSPO0000361405 |
| CCL2   | PTGS2    | 9606.ENSF9606.ENSPO0000356438 |
| CCL2   | MMP1     | 9606.ENSF9606.ENSPO0000322788 |
| CCL2   | ICAM1    | 9606.ENSF9606.ENSPO0000264832 |
| CCL2   | VCAM1    | 9606.ENSF9606.ENSPO0000294728 |
| CCL2   | CXCL10   | 9606.ENSF9606.ENSPO0000305651 |
| CCL2   | IL1B     | 9606.ENSF9606.ENSPO0000263341 |
| CCL2   | FOS      | 9606.ENSF9606.ENSPO0000306245 |
| CCL2   | JUN      | 9606.ENSF9606.ENSPO0000360266 |
| CCL2   | CXCL8    | 9606.ENSF9606.ENSPO0000306512 |
| CD14   | LBP      | 9606.ENSF9606.ENSPO0000217407 |
| CD40LG | IFNG     | 9606.ENSF9606.ENSPO0000229135 |
| CD40LG | ICAM1    | 9606.ENSF9606.ENSPO0000264832 |
| CD40LG | VCAM1    | 9606.ENSF9606.ENSPO0000294728 |
| CD40LG | MAPK8    | 9606.ENSF9606.ENSPO0000378974 |
| CDK2   | MAPK1    | 9606.ENSF9606.ENSPO0000215832 |
| CDK2   | ESR1     | 9606.ENSF9606.ENSPO0000405330 |
| CDK2   | HSP90AA  | 9606.ENSF9606.ENSPO0000335153 |
| CDK2   | E2F1     | 9606.ENSF9606.ENSPO0000345571 |
| CDK2   | TP53     | 9606.ENSF9606.ENSPO0000269305 |
| CDK2   | RB1      | 9606.ENSF9606.ENSPO0000267163 |
| CDK2   | CDKN1A   | 9606.ENSF9606.ENSPO0000384849 |

|         |          |                               |
|---------|----------|-------------------------------|
| CDKN1A  | RB1      | 9606.ENSF9606.ENSPO0000267163 |
| CDKN1A  | TP53     | 9606.ENSF9606.ENSPO0000269305 |
| CDKN1A  | HSP90AA: | 9606.ENSF9606.ENSPO0000335153 |
| CDKN1A  | E2F1     | 9606.ENSF9606.ENSPO0000345571 |
| CDKN1A  | JUN      | 9606.ENSF9606.ENSPO0000360266 |
| CDKN1A  | MAPK8    | 9606.ENSF9606.ENSPO0000378974 |
| CDKN1A  | ESR1     | 9606.ENSF9606.ENSPO0000405330 |
| CDKN1A  | HIF1A    | 9606.ENSF9606.ENSPO0000437955 |
| COL3A1  | MMP2     | 9606.ENSF9606.ENSPO0000219070 |
| COL3A1  | FN1      | 9606.ENSF9606.ENSPO0000346839 |
| CXCL10  | IFNG     | 9606.ENSF9606.ENSPO0000229135 |
| CXCL10  | IRF1     | 9606.ENSF9606.ENSPO0000245414 |
| CXCL10  | IL1B     | 9606.ENSF9606.ENSPO0000263341 |
| CXCL10  | ICAM1    | 9606.ENSF9606.ENSPO0000264832 |
| CXCL10  | MMP9     | 9606.ENSF9606.ENSPO0000361405 |
| CXCL10  | CXCL8    | 9606.ENSF9606.ENSPO0000306512 |
| CXCL8   | MAPK1    | 9606.ENSF9606.ENSPO0000215832 |
| CXCL8   | HMOX1    | 9606.ENSF9606.ENSPO0000216117 |
| CXCL8   | MMP2     | 9606.ENSF9606.ENSPO0000219070 |
| CXCL8   | SERPINE1 | 9606.ENSF9606.ENSPO0000223095 |
| CXCL8   | IFNG     | 9606.ENSF9606.ENSPO0000229135 |
| CXCL8   | IL1A     | 9606.ENSF9606.ENSPO0000263339 |
| CXCL8   | IL1B     | 9606.ENSF9606.ENSPO0000263341 |
| CXCL8   | KDR      | 9606.ENSF9606.ENSPO0000263923 |
| CXCL8   | ICAM1    | 9606.ENSF9606.ENSPO0000264832 |
| CXCL8   | EGFR     | 9606.ENSF9606.ENSPO0000275493 |
| CXCL8   | VCAM1    | 9606.ENSF9606.ENSPO0000294728 |
| CXCL8   | FOS      | 9606.ENSF9606.ENSPO0000306245 |
| CXCL8   | MAPK8    | 9606.ENSF9606.ENSPO0000378974 |
| CXCL8   | MMP1     | 9606.ENSF9606.ENSPO0000322788 |
| CXCL8   | FN1      | 9606.ENSF9606.ENSPO0000346839 |
| CXCL8   | MMP9     | 9606.ENSF9606.ENSPO0000361405 |
| CXCL8   | PTGS2    | 9606.ENSF9606.ENSPO0000356438 |
| CXCL8   | JUN      | 9606.ENSF9606.ENSPO0000360266 |
| CYP19A1 | PGR      | 9606.ENSF9606.ENSPO0000325120 |
| CYP19A1 | ESR2     | 9606.ENSF9606.ENSPO0000343925 |
| CYP19A1 | CYP1A1   | 9606.ENSF9606.ENSPO0000369050 |
| CYP19A1 | ESR1     | 9606.ENSF9606.ENSPO0000405330 |
| CYP1A1  | TP53     | 9606.ENSF9606.ENSPO0000269305 |
| CYP1A1  | GSTM1    | 9606.ENSF9606.ENSPO0000311469 |
| CYP1A1  | NQO1     | 9606.ENSF9606.ENSPO0000319788 |
| CYP1A1  | CYP1B1   | 9606.ENSF9606.ENSPO0000478561 |
| CYP1A1  | PPARA    | 9606.ENSF9606.ENSPO0000385523 |
| CYP1B1  | GSTM1    | 9606.ENSF9606.ENSPO0000311469 |
| CYP1B1  | NQO1     | 9606.ENSF9606.ENSPO0000319788 |
| CYP1B1  | ESR2     | 9606.ENSF9606.ENSPO0000343925 |
| DPP4    | FN1      | 9606.ENSF9606.ENSPO0000346839 |
| E2F1    | RB1      | 9606.ENSF9606.ENSPO0000267163 |
| E2F1    | TP53     | 9606.ENSF9606.ENSPO0000269305 |
| E2F1    | PPARG    | 9606.ENSF9606.ENSPO0000287820 |
| EGFR    | MAPK1    | 9606.ENSF9606.ENSPO0000215832 |
| EGFR    | SERPINE1 | 9606.ENSF9606.ENSPO0000223095 |
| EGFR    | IFNG     | 9606.ENSF9606.ENSPO0000229135 |
| EGFR    | HSPB1    | 9606.ENSF9606.ENSPO0000248553 |
| EGFR    | ERBB3    | 9606.ENSF9606.ENSPO0000267101 |
| EGFR    | TP53     | 9606.ENSF9606.ENSPO0000269305 |
| EGFR    | RASA1    | 9606.ENSF9606.ENSPO0000274376 |
| EGFR    | ESR2     | 9606.ENSF9606.ENSPO0000343925 |

|       |          |                               |
|-------|----------|-------------------------------|
| EGFR  | PPARG    | 9606.ENSF9606.ENSPO0000287820 |
| EGFR  | PGR      | 9606.ENSF9606.ENSPO0000325120 |
| EGFR  | MMP9     | 9606.ENSF9606.ENSPO0000361405 |
| EGFR  | IGF2     | 9606.ENSF9606.ENSPO0000391826 |
| EGFR  | IGFBP3   | 9606.ENSF9606.ENSPO0000370473 |
| EGFR  | PTGS2    | 9606.ENSF9606.ENSPO0000356438 |
| EGFR  | JUN      | 9606.ENSF9606.ENSPO0000360266 |
| EGFR  | FOS      | 9606.ENSF9606.ENSPO0000306245 |
| EGFR  | ESR1     | 9606.ENSF9606.ENSPO0000405330 |
| EGFR  | FN1      | 9606.ENSF9606.ENSPO0000346839 |
| EGFR  | HIF1A    | 9606.ENSF9606.ENSPO0000437955 |
| EGFR  | HSP90AA: | 9606.ENSF9606.ENSPO0000335153 |
| ERBB3 | IGF2     | 9606.ENSF9606.ENSPO0000391826 |
| ERBB3 | MAPK8    | 9606.ENSF9606.ENSPO0000378974 |
| ERBB3 | HSP90AA: | 9606.ENSF9606.ENSPO0000335153 |
| ESR1  | MAPK1    | 9606.ENSF9606.ENSPO0000215832 |
| ESR1  | HSPB1    | 9606.ENSF9606.ENSPO0000248553 |
| ESR1  | RB1      | 9606.ENSF9606.ENSPO0000267163 |
| ESR1  | TP53     | 9606.ENSF9606.ENSPO0000269305 |
| ESR1  | NOS3     | 9606.ENSF9606.ENSPO0000297494 |
| ESR1  | FOS      | 9606.ENSF9606.ENSPO0000306245 |
| ESR1  | PGR      | 9606.ENSF9606.ENSPO0000325120 |
| ESR1  | HSP90AA: | 9606.ENSF9606.ENSPO0000335153 |
| ESR1  | ESR2     | 9606.ENSF9606.ENSPO0000343925 |
| ESR1  | FN1      | 9606.ENSF9606.ENSPO0000346839 |
| ESR1  | PTGS2    | 9606.ENSF9606.ENSPO0000356438 |
| ESR1  | JUN      | 9606.ENSF9606.ENSPO0000360266 |
| ESR1  | RUNX2    | 9606.ENSF9606.ENSPO0000360493 |
| ESR1  | MAPK8    | 9606.ENSF9606.ENSPO0000378974 |
| ESR1  | HIF1A    | 9606.ENSF9606.ENSPO0000437955 |
| ESR2  | MAPK1    | 9606.ENSF9606.ENSPO0000215832 |
| ESR2  | NOS3     | 9606.ENSF9606.ENSPO0000297494 |
| ESR2  | FOS      | 9606.ENSF9606.ENSPO0000306245 |
| ESR2  | HSP90AA: | 9606.ENSF9606.ENSPO0000335153 |
| ESR2  | MAPK8    | 9606.ENSF9606.ENSPO0000378974 |
| ESR2  | JUN      | 9606.ENSF9606.ENSPO0000360266 |
| F2    | MAPK1    | 9606.ENSF9606.ENSPO0000215832 |
| F2    | PLAT     | 9606.ENSF9606.ENSPO0000220809 |
| F2    | SERPINE1 | 9606.ENSF9606.ENSPO0000223095 |
| F2    | FN1      | 9606.ENSF9606.ENSPO0000346839 |
| F2    | SPP1     | 9606.ENSF9606.ENSPO0000378517 |
| F2    | PPARA    | 9606.ENSF9606.ENSPO0000385523 |
| F2    | IGF2     | 9606.ENSF9606.ENSPO0000391826 |
| F2    | IGFBP3   | 9606.ENSF9606.ENSPO0000370473 |
| F2    | F3       | 9606.ENSF9606.ENSPO0000334145 |
| F2    | THBD     | 9606.ENSF9606.ENSPO0000366307 |
| F3    | PLAT     | 9606.ENSF9606.ENSPO0000220809 |
| F3    | SERPINE1 | 9606.ENSF9606.ENSPO0000223095 |
| F3    | THBD     | 9606.ENSF9606.ENSPO0000366307 |
| FN1   | MAPK1    | 9606.ENSF9606.ENSPO0000215832 |
| FN1   | PLAT     | 9606.ENSF9606.ENSPO0000220809 |
| FN1   | SERPINE1 | 9606.ENSF9606.ENSPO0000223095 |
| FN1   | IL1B     | 9606.ENSF9606.ENSPO0000263341 |
| FN1   | KDR      | 9606.ENSF9606.ENSPO0000263923 |
| FN1   | ICAM1    | 9606.ENSF9606.ENSPO0000264832 |
| FN1   | VCAM1    | 9606.ENSF9606.ENSPO0000294728 |
| FN1   | NOS3     | 9606.ENSF9606.ENSPO0000297494 |
| FN1   | MMP1     | 9606.ENSF9606.ENSPO0000322788 |

|          |          |                               |
|----------|----------|-------------------------------|
| FN1      | PTGS2    | 9606.ENSF9606.ENSPO0000356438 |
| FN1      | JUN      | 9606.ENSF9606.ENSPO0000360266 |
| FN1      | IGF2     | 9606.ENSF9606.ENSPO0000391826 |
| FN1      | SPP1     | 9606.ENSF9606.ENSPO0000378517 |
| FN1      | IGFBP3   | 9606.ENSF9606.ENSPO0000370473 |
| FOS      | MAPK1    | 9606.ENSF9606.ENSPO0000215832 |
| FOS      | HMOX1    | 9606.ENSF9606.ENSPO0000216117 |
| FOS      | IL1A     | 9606.ENSF9606.ENSPO0000263339 |
| FOS      | IL1B     | 9606.ENSF9606.ENSPO0000263341 |
| FOS      | FOSL2    | 9606.ENSF9606.ENSPO0000264716 |
| FOS      | TP53     | 9606.ENSF9606.ENSPO0000269305 |
| FOS      | PPARG    | 9606.ENSF9606.ENSPO0000287820 |
| FOS      | PTGS2    | 9606.ENSF9606.ENSPO0000356438 |
| FOS      | MMP1     | 9606.ENSF9606.ENSPO0000322788 |
| FOS      | MAPK8    | 9606.ENSF9606.ENSPO0000378974 |
| FOS      | JUN      | 9606.ENSF9606.ENSPO0000360266 |
| FOSL2    | MAPK1    | 9606.ENSF9606.ENSPO0000215832 |
| FOSL2    | MAPK8    | 9606.ENSF9606.ENSPO0000378974 |
| FOSL2    | JUN      | 9606.ENSF9606.ENSPO0000360266 |
| GSK3B    | TP53     | 9606.ENSF9606.ENSPO0000269305 |
| GSK3B    | JUN      | 9606.ENSF9606.ENSPO0000360266 |
| GSTM1    | NQO1     | 9606.ENSF9606.ENSPO0000319788 |
| HIF1A    | MAPK1    | 9606.ENSF9606.ENSPO0000215832 |
| HIF1A    | HMOX1    | 9606.ENSF9606.ENSPO0000216117 |
| HIF1A    | MMP2     | 9606.ENSF9606.ENSPO0000219070 |
| HIF1A    | TP53     | 9606.ENSF9606.ENSPO0000269305 |
| HIF1A    | NOS3     | 9606.ENSF9606.ENSPO0000297494 |
| HIF1A    | HSP90AA: | 9606.ENSF9606.ENSPO0000335153 |
| HIF1A    | JUN      | 9606.ENSF9606.ENSPO0000360266 |
| HMOX1    | MAPK1    | 9606.ENSF9606.ENSPO0000215832 |
| HMOX1    | SOD1     | 9606.ENSF9606.ENSPO0000270142 |
| HMOX1    | PPARG    | 9606.ENSF9606.ENSPO0000287820 |
| HMOX1    | MMP9     | 9606.ENSF9606.ENSPO0000361405 |
| HMOX1    | TP53     | 9606.ENSF9606.ENSPO0000269305 |
| HMOX1    | MAPK8    | 9606.ENSF9606.ENSPO0000378974 |
| HMOX1    | IL1B     | 9606.ENSF9606.ENSPO0000263341 |
| HMOX1    | NOS2     | 9606.ENSF9606.ENSPO0000327251 |
| HMOX1    | PTGS2    | 9606.ENSF9606.ENSPO0000356438 |
| HMOX1    | NOS3     | 9606.ENSF9606.ENSPO0000297494 |
| HMOX1    | NQO1     | 9606.ENSF9606.ENSPO0000319788 |
| HMOX1    | JUN      | 9606.ENSF9606.ENSPO0000360266 |
| HSP90AA: | MAPK1    | 9606.ENSF9606.ENSPO0000215832 |
| HSP90AA: | MMP2     | 9606.ENSF9606.ENSPO0000219070 |
| HSP90AA: | IFNG     | 9606.ENSF9606.ENSPO0000229135 |
| HSP90AA: | IRF1     | 9606.ENSF9606.ENSPO0000245414 |
| HSP90AA: | HSPB1    | 9606.ENSF9606.ENSPO0000248553 |
| HSP90AA: | KDR      | 9606.ENSF9606.ENSPO0000263923 |
| HSP90AA: | RB1      | 9606.ENSF9606.ENSPO0000267163 |
| HSP90AA: | TP53     | 9606.ENSF9606.ENSPO0000269305 |
| HSP90AA: | SOD1     | 9606.ENSF9606.ENSPO0000270142 |
| HSP90AA: | NOS3     | 9606.ENSF9606.ENSPO0000297494 |
| HSP90AA: | HSPA5    | 9606.ENSF9606.ENSPO0000324173 |
| HSP90AA: | PGR      | 9606.ENSF9606.ENSPO0000325120 |
| HSP90AA: | NOS2     | 9606.ENSF9606.ENSPO0000327251 |
| HSP90AA: | MAPK8    | 9606.ENSF9606.ENSPO0000378974 |
| HSP90AA: | PPARA    | 9606.ENSF9606.ENSPO0000385523 |
| HSP90AA: | NR3C2    | 9606.ENSF9606.ENSPO0000350815 |
| HSPA5    | HSPB1    | 9606.ENSF9606.ENSPO0000248553 |

|        |          |                               |
|--------|----------|-------------------------------|
| HSPA5  | MAPK8    | 9606.ENSF9606.ENSP00000378974 |
| HSPB1  | MAPK1    | 9606.ENSF9606.ENSP00000215832 |
| HSPB1  | TP53     | 9606.ENSF9606.ENSP00000269305 |
| ICAM1  | MAPK1    | 9606.ENSF9606.ENSP00000215832 |
| ICAM1  | MMP2     | 9606.ENSF9606.ENSP00000219070 |
| ICAM1  | IFNG     | 9606.ENSF9606.ENSP00000229135 |
| ICAM1  | IRF1     | 9606.ENSF9606.ENSP00000245414 |
| ICAM1  | IL1A     | 9606.ENSF9606.ENSP00000263339 |
| ICAM1  | IL1B     | 9606.ENSF9606.ENSP00000263341 |
| ICAM1  | NOS3     | 9606.ENSF9606.ENSP00000297494 |
| ICAM1  | PTGS2    | 9606.ENSF9606.ENSP00000356438 |
| ICAM1  | PPARG    | 9606.ENSF9606.ENSP00000287820 |
| ICAM1  | SPP1     | 9606.ENSF9606.ENSP00000378517 |
| ICAM1  | TP53     | 9606.ENSF9606.ENSP00000269305 |
| ICAM1  | MMP9     | 9606.ENSF9606.ENSP00000361405 |
| ICAM1  | JUN      | 9606.ENSF9606.ENSP00000360266 |
| ICAM1  | MAPK8    | 9606.ENSF9606.ENSP00000378974 |
| ICAM1  | VCAM1    | 9606.ENSF9606.ENSP00000294728 |
| IFNG   | IL1A     | 9606.ENSF9606.ENSP00000263339 |
| IFNG   | MMP9     | 9606.ENSF9606.ENSP00000361405 |
| IFNG   | IL6R     | 9606.ENSF9606.ENSP00000357470 |
| IFNG   | NOS2     | 9606.ENSF9606.ENSP00000327251 |
| IFNG   | IL1B     | 9606.ENSF9606.ENSP00000263341 |
| IFNG   | JUN      | 9606.ENSF9606.ENSP00000360266 |
| IFNG   | IRF1     | 9606.ENSF9606.ENSP00000245414 |
| IGF2   | MMP2     | 9606.ENSF9606.ENSP00000219070 |
| IGF2   | SERPINE1 | 9606.ENSF9606.ENSP00000223095 |
| IGF2   | KDR      | 9606.ENSF9606.ENSP00000263923 |
| IGF2   | TP53     | 9606.ENSF9606.ENSP00000269305 |
| IGF2   | MMP1     | 9606.ENSF9606.ENSP00000322788 |
| IGF2   | IGFBP3   | 9606.ENSF9606.ENSP00000370473 |
| IGFBP3 | MMP2     | 9606.ENSF9606.ENSP00000219070 |
| IGFBP3 | TP53     | 9606.ENSF9606.ENSP00000269305 |
| IGFBP3 | PPARG    | 9606.ENSF9606.ENSP00000287820 |
| IGFBP3 | MMP1     | 9606.ENSF9606.ENSP00000322788 |
| IGFBP3 | MAPK8    | 9606.ENSF9606.ENSP00000378974 |
| IGFBP3 | SPP1     | 9606.ENSF9606.ENSP00000378517 |
| IL1A   | VCAM1    | 9606.ENSF9606.ENSP00000294728 |
| IL1A   | MMP1     | 9606.ENSF9606.ENSP00000322788 |
| IL1A   | PTGS2    | 9606.ENSF9606.ENSP00000356438 |
| IL1A   | JUN      | 9606.ENSF9606.ENSP00000360266 |
| IL1A   | IL1B     | 9606.ENSF9606.ENSP00000263341 |
| IL1B   | MAPK1    | 9606.ENSF9606.ENSP00000215832 |
| IL1B   | MMP2     | 9606.ENSF9606.ENSP00000219070 |
| IL1B   | IRF1     | 9606.ENSF9606.ENSP00000245414 |
| IL1B   | SPP1     | 9606.ENSF9606.ENSP00000378517 |
| IL1B   | NOS3     | 9606.ENSF9606.ENSP00000297494 |
| IL1B   | MAPK8    | 9606.ENSF9606.ENSP00000378974 |
| IL1B   | PPARG    | 9606.ENSF9606.ENSP00000287820 |
| IL1B   | NOS2     | 9606.ENSF9606.ENSP00000327251 |
| IL1B   | MMP1     | 9606.ENSF9606.ENSP00000322788 |
| IL1B   | VCAM1    | 9606.ENSF9606.ENSP00000294728 |
| IL1B   | MMP9     | 9606.ENSF9606.ENSP00000361405 |
| IL1B   | JUN      | 9606.ENSF9606.ENSP00000360266 |
| IL1B   | PTGS2    | 9606.ENSF9606.ENSP00000356438 |
| IL6R   | MAPK1    | 9606.ENSF9606.ENSP00000215832 |
| IRF1   | NOS2     | 9606.ENSF9606.ENSP00000327251 |
| IRF1   | TP53     | 9606.ENSF9606.ENSP00000269305 |

|       |          |                               |
|-------|----------|-------------------------------|
| IRF1  | JUN      | 9606.ENSF9606.ENSPO0000360266 |
| IRF1  | VCAM1    | 9606.ENSF9606.ENSPO0000294728 |
| JUN   | MAPK1    | 9606.ENSF9606.ENSPO0000215832 |
| JUN   | RB1      | 9606.ENSF9606.ENSPO0000267163 |
| JUN   | TP53     | 9606.ENSF9606.ENSPO0000269305 |
| JUN   | PPARG    | 9606.ENSF9606.ENSPO0000287820 |
| JUN   | NOS3     | 9606.ENSF9606.ENSPO0000297494 |
| JUN   | MMP1     | 9606.ENSF9606.ENSPO0000322788 |
| JUN   | NOS2     | 9606.ENSF9606.ENSPO0000327251 |
| JUN   | PTGS2    | 9606.ENSF9606.ENSPO0000356438 |
| JUN   | MMP9     | 9606.ENSF9606.ENSPO0000361405 |
| JUN   | PPARA    | 9606.ENSF9606.ENSPO0000385523 |
| JUN   | MAPK8    | 9606.ENSF9606.ENSPO0000378974 |
| KDR   | TP53     | 9606.ENSF9606.ENSPO0000269305 |
| KDR   | NOS3     | 9606.ENSF9606.ENSPO0000297494 |
| MAPK1 | NCF1     | 9606.ENSF9606.ENSPO0000289473 |
| MAPK1 | MMP1     | 9606.ENSF9606.ENSPO0000322788 |
| MAPK1 | NOS3     | 9606.ENSF9606.ENSPO0000297494 |
| MAPK1 | MMP2     | 9606.ENSF9606.ENSPO0000219070 |
| MAPK1 | PTGS2    | 9606.ENSF9606.ENSPO0000356438 |
| MAPK1 | MMP9     | 9606.ENSF9606.ENSPO0000361405 |
| MAPK1 | RASA1    | 9606.ENSF9606.ENSPO0000274376 |
| MAPK1 | MAPK8    | 9606.ENSF9606.ENSPO0000378974 |
| MAPK1 | PPARA    | 9606.ENSF9606.ENSPO0000385523 |
| MAPK1 | RB1      | 9606.ENSF9606.ENSPO0000267163 |
| MAPK1 | PGR      | 9606.ENSF9606.ENSPO0000325120 |
| MAPK1 | RUNX2    | 9606.ENSF9606.ENSPO0000360493 |
| MAPK1 | TP53     | 9606.ENSF9606.ENSPO0000269305 |
| MAPK8 | MMP2     | 9606.ENSF9606.ENSPO0000219070 |
| MAPK8 | SERPINE1 | 9606.ENSF9606.ENSPO0000223095 |
| MAPK8 | TP53     | 9606.ENSF9606.ENSPO0000269305 |
| MAPK8 | SOD1     | 9606.ENSF9606.ENSPO0000270142 |
| MAPK8 | RASA1    | 9606.ENSF9606.ENSPO0000274376 |
| MAPK8 | PPARG    | 9606.ENSF9606.ENSPO0000287820 |
| MAPK8 | VCAM1    | 9606.ENSF9606.ENSPO0000294728 |
| MAPK8 | SLC2A4   | 9606.ENSF9606.ENSPO0000320935 |
| MAPK8 | MMP1     | 9606.ENSF9606.ENSPO0000322788 |
| MAPK8 | PGR      | 9606.ENSF9606.ENSPO0000325120 |
| MAPK8 | PTGS2    | 9606.ENSF9606.ENSPO0000356438 |
| MAPK8 | RUNX2    | 9606.ENSF9606.ENSPO0000360493 |
| MAPK8 | MMP9     | 9606.ENSF9606.ENSPO0000361405 |
| MMP1  | MMP2     | 9606.ENSF9606.ENSPO0000219070 |
| MMP1  | TP53     | 9606.ENSF9606.ENSPO0000269305 |
| MMP1  | MMP9     | 9606.ENSF9606.ENSPO0000361405 |
| MMP2  | PTGS2    | 9606.ENSF9606.ENSPO0000356438 |
| MMP2  | SERPINE1 | 9606.ENSF9606.ENSPO0000223095 |
| MMP2  | SPP1     | 9606.ENSF9606.ENSPO0000378517 |
| MMP2  | TP53     | 9606.ENSF9606.ENSPO0000269305 |
| MMP2  | NCF1     | 9606.ENSF9606.ENSPO0000289473 |
| MMP2  | MMP9     | 9606.ENSF9606.ENSPO0000361405 |
| MMP9  | PLAT     | 9606.ENSF9606.ENSPO0000220809 |
| MMP9  | SERPINE1 | 9606.ENSF9606.ENSPO0000223095 |
| MMP9  | TP53     | 9606.ENSF9606.ENSPO0000269305 |
| MMP9  | PPARG    | 9606.ENSF9606.ENSPO0000287820 |
| MMP9  | NCF1     | 9606.ENSF9606.ENSPO0000289473 |
| MMP9  | NOS3     | 9606.ENSF9606.ENSPO0000297494 |
| MMP9  | PTGS2    | 9606.ENSF9606.ENSPO0000356438 |
| MMP9  | RUNX2    | 9606.ENSF9606.ENSPO0000360493 |



|          |          |                               |
|----------|----------|-------------------------------|
| MMP9     | SPP1     | 9606.ENSF9606.ENSP00000378517 |
| NCF1     | VCAM1    | 9606.ENSF9606.ENSP00000294728 |
| NOS2     | NOS3     | 9606.ENSF9606.ENSP00000297494 |
| NOS2     | PTGS2    | 9606.ENSF9606.ENSP00000356438 |
| NOS2     | PPARA    | 9606.ENSF9606.ENSP00000385523 |
| NOS3     | TP53     | 9606.ENSF9606.ENSP00000269305 |
| NOS3     | PPARG    | 9606.ENSF9606.ENSP00000287820 |
| NOS3     | VCAM1    | 9606.ENSF9606.ENSP00000294728 |
| NOS3     | PTGS2    | 9606.ENSF9606.ENSP00000356438 |
| NQO1     | ODC1     | 9606.ENSF9606.ENSP00000234111 |
| NQO1     | TP53     | 9606.ENSF9606.ENSP00000269305 |
| NR3C2    | PGR      | 9606.ENSF9606.ENSP00000325120 |
| PGR      | RB1      | 9606.ENSF9606.ENSP00000267163 |
| PGR      | TP53     | 9606.ENSF9606.ENSP00000269305 |
| PLAT     | THBD     | 9606.ENSF9606.ENSP00000366307 |
| PLAT     | SERPINE1 | 9606.ENSF9606.ENSP00000223095 |
| PPARA    | RB1      | 9606.ENSF9606.ENSP00000267163 |
| PPARG    | SERPINE1 | 9606.ENSF9606.ENSP00000223095 |
| PPARG    | RB1      | 9606.ENSF9606.ENSP00000267163 |
| PPARG    | TP53     | 9606.ENSF9606.ENSP00000269305 |
| PPARG    | RUNX2    | 9606.ENSF9606.ENSP00000360493 |
| PPARG    | PTGS2    | 9606.ENSF9606.ENSP00000356438 |
| PPARG    | SLC2A4   | 9606.ENSF9606.ENSP00000320935 |
| PTGS2    | TP53     | 9606.ENSF9606.ENSP00000269305 |
| PTGS2    | VCAM1    | 9606.ENSF9606.ENSP00000294728 |
| RB1      | RUNX2    | 9606.ENSF9606.ENSP00000360493 |
| RB1      | TP53     | 9606.ENSF9606.ENSP00000269305 |
| RUNX2    | TP53     | 9606.ENSF9606.ENSP00000269305 |
| RUNX2    | SPP1     | 9606.ENSF9606.ENSP00000378517 |
| SERPINE1 | THBD     | 9606.ENSF9606.ENSP00000366307 |
| SERPINE1 | TP53     | 9606.ENSF9606.ENSP00000269305 |
| SPP1     | TP53     | 9606.ENSF9606.ENSP00000269305 |
| TOP2A    | TP53     | 9606.ENSF9606.ENSP00000269305 |

#### GO analysis

| ONTOLOCID | GeneRatio | BgRatio | pvalue    | p.adjust | qvalue   | Count    |    |
|-----------|-----------|---------|-----------|----------|----------|----------|----|
| BP        | GO:00100  | 25/88   | 364/18670 | 1.54E-22 | 5.39E-19 | 2.57E-19 | 25 |
| BP        | GO:00324  | 24/88   | 330/18670 | 3.17E-22 | 5.56E-19 | 2.65E-19 | 24 |
| BP        | GO:00022  | 24/88   | 343/18670 | 7.94E-22 | 9.27E-19 | 4.42E-19 | 24 |
| BP        | GO:00725  | 21/88   | 284/18670 | 1.27E-19 | 1.11E-16 | 5.32E-17 | 21 |
| BP        | GO:00316  | 25/88   | 499/18670 | 3.30E-19 | 2.31E-16 | 1.10E-16 | 25 |
| BP        | GO:00709  | 22/88   | 348/18670 | 4.56E-19 | 2.66E-16 | 1.27E-16 | 22 |
| BP        | GO:00971  | 19/88   | 224/18670 | 6.32E-19 | 3.16E-16 | 1.51E-16 | 19 |
| BP        | GO:20012  | 23/88   | 406/18670 | 7.38E-19 | 3.23E-16 | 1.54E-16 | 23 |
| BP        | GO:00486  | 23/88   | 431/18670 | 2.78E-18 | 1.08E-15 | 5.16E-16 | 23 |
| BP        | GO:00614  | 23/88   | 434/18670 | 3.24E-18 | 1.14E-15 | 5.41E-16 | 23 |
| BP        | GO:00345  | 20/88   | 302/18670 | 9.15E-18 | 2.91E-15 | 1.39E-15 | 20 |
| BP        | GO:00712  | 11/88   | 37/18670  | 1.03E-17 | 3.02E-15 | 1.44E-15 | 11 |
| BP        | GO:00447  | 18/88   | 222/18670 | 1.31E-17 | 3.52E-15 | 1.68E-15 | 18 |
| BP        | GO:19012  | 20/88   | 313/18670 | 1.84E-17 | 4.61E-15 | 2.20E-15 | 20 |
| BP        | GO:00075  | 17/88   | 192/18670 | 2.55E-17 | 5.95E-15 | 2.84E-15 | 17 |
| BP        | GO:00003  | 18/88   | 232/18670 | 2.88E-17 | 6.30E-15 | 3.00E-15 | 18 |
| BP        | GO:00485  | 21/88   | 385/18670 | 6.53E-17 | 1.35E-14 | 6.42E-15 | 21 |
| BP        | GO:00714  | 20/88   | 339/18670 | 8.71E-17 | 1.69E-14 | 8.08E-15 | 20 |
| BP        | GO:00704  | 21/88   | 394/18670 | 1.04E-16 | 1.92E-14 | 9.16E-15 | 21 |
| BP        | GO:00069  | 22/88   | 451/18670 | 1.12E-16 | 1.96E-14 | 9.37E-15 | 22 |
| BP        | GO:20012  | 17/88   | 230/18670 | 5.41E-16 | 9.02E-14 | 4.30E-14 | 17 |
| BP        | GO:20003  | 16/88   | 195/18670 | 8.08E-16 | 1.27E-13 | 6.05E-14 | 16 |

|    |                |           |          |          |          |    |
|----|----------------|-----------|----------|----------|----------|----|
| BP | GO:00712 17/88 | 236/1867C | 8.33E-16 | 1.27E-13 | 6.05E-14 | 17 |
| BP | GO:00092 17/88 | 243/1867C | 1.36E-15 | 1.98E-13 | 9.45E-14 | 17 |
| BP | GO:00346 15/88 | 168/1867C | 1.96E-15 | 2.74E-13 | 1.31E-13 | 15 |
| BP | GO:00016 19/88 | 359/1867C | 4.12E-15 | 5.55E-13 | 2.65E-13 | 19 |
| BP | GO:00712 16/88 | 217/1867C | 4.40E-15 | 5.71E-13 | 2.72E-13 | 16 |
| BP | GO:00466 11/88 | 63/18670  | 6.74E-15 | 8.44E-13 | 4.02E-13 | 11 |
| BP | GO:00362 19/88 | 370/1867C | 7.13E-15 | 8.61E-13 | 4.11E-13 | 19 |
| BP | GO:00466 18/88 | 327/1867C | 1.20E-14 | 1.40E-12 | 6.65E-13 | 18 |
| BP | GO:00712 15/88 | 190/1867C | 1.23E-14 | 1.40E-12 | 6.65E-13 | 15 |
| BP | GO:19016 15/88 | 193/1867C | 1.56E-14 | 1.71E-12 | 8.14E-13 | 15 |
| BP | GO:19034 13/88 | 122/1867C | 1.64E-14 | 1.74E-12 | 8.29E-13 | 13 |
| BP | GO:00093 20/88 | 448/1867C | 1.80E-14 | 1.85E-12 | 8.85E-13 | 20 |
| BP | GO:00514 16/88 | 239/1867C | 2.01E-14 | 2.01E-12 | 9.58E-13 | 16 |
| BP | GO:00971 17/88 | 289/1867C | 2.40E-14 | 2.34E-12 | 1.11E-12 | 17 |
| BP | GO:00620 20/88 | 459/1867C | 2.84E-14 | 2.69E-12 | 1.28E-12 | 20 |
| BP | GO:00485 17/88 | 295/1867C | 3.37E-14 | 3.10E-12 | 1.48E-12 | 17 |
| BP | GO:00486 14/88 | 169/1867C | 5.18E-14 | 4.64E-12 | 2.21E-12 | 14 |
| BP | GO:20003 12/88 | 102/1867C | 5.30E-14 | 4.64E-12 | 2.21E-12 | 12 |
| BP | GO:00486 14/88 | 171/1867C | 6.10E-14 | 5.21E-12 | 2.49E-12 | 14 |
| BP | GO:00068 11/88 | 77/18670  | 6.94E-14 | 5.79E-12 | 2.76E-12 | 11 |
| BP | GO:00510 18/88 | 373/1867C | 1.16E-13 | 9.42E-12 | 4.49E-12 | 18 |
| BP | GO:00506 19/88 | 434/1867C | 1.26E-13 | 1.00E-11 | 4.79E-12 | 19 |
| BP | GO:00462 11/88 | 82/18670  | 1.43E-13 | 1.11E-11 | 5.30E-12 | 11 |
| BP | GO:20010 11/88 | 85/18670  | 2.15E-13 | 1.64E-11 | 7.80E-12 | 11 |
| BP | GO:00330 15/88 | 239/1867C | 3.62E-13 | 2.70E-11 | 1.29E-11 | 15 |
| BP | GO:00421 19/88 | 464/1867C | 4.14E-13 | 3.02E-11 | 1.44E-11 | 19 |
| BP | GO:00712 14/88 | 205/1867C | 7.47E-13 | 5.34E-11 | 2.55E-11 | 14 |
| BP | GO:00085 11/88 | 96/18670  | 8.52E-13 | 5.97E-11 | 2.85E-11 | 11 |
| BP | GO:00435 14/88 | 210/1867C | 1.04E-12 | 7.13E-11 | 3.40E-11 | 14 |
| BP | GO:00712 14/88 | 212/1867C | 1.18E-12 | 7.96E-11 | 3.80E-11 | 14 |
| BP | GO:00380 10/88 | 72/18670  | 1.35E-12 | 8.76E-11 | 4.18E-11 | 10 |
| BP | GO:00971 10/88 | 72/18670  | 1.35E-12 | 8.76E-11 | 4.18E-11 | 10 |
| BP | GO:00465 11/88 | 101/1867C | 1.51E-12 | 9.60E-11 | 4.58E-11 | 11 |
| BP | GO:00316 15/88 | 268/1867C | 1.90E-12 | 1.19E-10 | 5.65E-11 | 15 |
| BP | GO:00094 13/88 | 176/1867C | 1.93E-12 | 1.19E-10 | 5.65E-11 | 13 |
| BP | GO:20012 11/88 | 104/1867C | 2.09E-12 | 1.26E-10 | 6.02E-11 | 11 |
| BP | GO:00421 11/88 | 106/1867C | 2.59E-12 | 1.54E-10 | 7.32E-11 | 11 |
| BP | GO:00712 16/88 | 331/1867C | 3.03E-12 | 1.74E-10 | 8.30E-11 | 16 |
| BP | GO:01040 16/88 | 331/1867C | 3.03E-12 | 1.74E-10 | 8.30E-11 | 16 |
| BP | GO:00973 14/88 | 233/1867C | 4.27E-12 | 2.41E-10 | 1.15E-10 | 14 |
| BP | GO:00011 16/88 | 343/1867C | 5.20E-12 | 2.89E-10 | 1.38E-10 | 16 |
| BP | GO:00481 10/88 | 83/18670  | 5.88E-12 | 3.22E-10 | 1.53E-10 | 10 |
| BP | GO:00466 11/88 | 115/1867C | 6.40E-12 | 3.45E-10 | 1.64E-10 | 11 |
| BP | GO:00481 10/88 | 84/18670  | 6.65E-12 | 3.53E-10 | 1.68E-10 | 10 |
| BP | GO:20012 12/88 | 155/1867C | 8.32E-12 | 4.35E-10 | 2.08E-10 | 12 |
| BP | GO:19030 15/88 | 304/1867C | 1.16E-11 | 5.97E-10 | 2.85E-10 | 15 |
| BP | GO:00086 11/88 | 124/1867C | 1.47E-11 | 7.46E-10 | 3.56E-10 | 11 |
| BP | GO:19012 13/88 | 208/1867C | 1.61E-11 | 8.07E-10 | 3.85E-10 | 13 |
| BP | GO:00601 9/88  | 64/18670  | 1.68E-11 | 8.30E-10 | 3.96E-10 | 9  |
| BP | GO:19016 10/88 | 93/18670  | 1.88E-11 | 9.14E-10 | 4.36E-10 | 10 |
| BP | GO:19012 10/88 | 94/18670  | 2.09E-11 | 1.01E-09 | 4.79E-10 | 10 |
| BP | GO:00506 16/88 | 378/1867C | 2.23E-11 | 1.06E-09 | 5.04E-10 | 16 |
| BP | GO:00511 12/88 | 169/1867C | 2.31E-11 | 1.08E-09 | 5.15E-10 | 12 |
| BP | GO:00075 15/88 | 321/1867C | 2.51E-11 | 1.16E-09 | 5.51E-10 | 15 |
| BP | GO:00084 13/88 | 217/1867C | 2.75E-11 | 1.25E-09 | 5.96E-10 | 13 |
| BP | GO:00075 13/88 | 219/1867C | 3.08E-11 | 1.38E-09 | 6.60E-10 | 13 |
| BP | GO:00451 13/88 | 223/1867C | 3.87E-11 | 1.71E-09 | 8.18E-10 | 13 |
| BP | GO:00071 15/88 | 337/1867C | 4.98E-11 | 2.18E-09 | 1.04E-09 | 15 |

|    |          |       |           |          |          |          |    |
|----|----------|-------|-----------|----------|----------|----------|----|
| BP | GO:00108 | 12/88 | 182/1867C | 5.51E-11 | 2.39E-09 | 1.14E-09 | 12 |
| BP | GO:19040 | 13/88 | 230/1867C | 5.69E-11 | 2.43E-09 | 1.16E-09 | 13 |
| BP | GO:00352 | 11/88 | 143/1867C | 6.98E-11 | 2.88E-09 | 1.37E-09 | 11 |
| BP | GO:00508 | 11/88 | 143/1867C | 6.98E-11 | 2.88E-09 | 1.37E-09 | 11 |
| BP | GO:00977 | 11/88 | 143/1867C | 6.98E-11 | 2.88E-09 | 1.37E-09 | 11 |
| BP | GO:00351 | 11/88 | 144/1867C | 7.53E-11 | 3.07E-09 | 1.46E-09 | 11 |
| BP | GO:00063 | 12/88 | 188/1867C | 8.05E-11 | 3.24E-09 | 1.55E-09 | 12 |
| BP | GO:00316 | 13/88 | 237/1867C | 8.27E-11 | 3.29E-09 | 1.57E-09 | 13 |
| BP | GO:00106 | 15/88 | 351/1867C | 8.81E-11 | 3.47E-09 | 1.65E-09 | 15 |
| BP | GO:00160 | 17/88 | 484/1867C | 9.19E-11 | 3.57E-09 | 1.70E-09 | 17 |
| BP | GO:00015 | 16/88 | 416/1867C | 9.27E-11 | 3.57E-09 | 1.70E-09 | 16 |
| BP | GO:00102 | 11/88 | 147/1867C | 9.41E-11 | 3.57E-09 | 1.70E-09 | 11 |
| BP | GO:00488 | 17/88 | 485/1867C | 9.48E-11 | 3.57E-09 | 1.70E-09 | 17 |
| BP | GO:00901 | 15/88 | 354/1867C | 9.93E-11 | 3.70E-09 | 1.76E-09 | 15 |
| BP | GO:19040 | 10/88 | 111/1867C | 1.12E-10 | 4.13E-09 | 1.97E-09 | 10 |
| BP | GO:19013 | 16/88 | 422/1867C | 1.14E-10 | 4.18E-09 | 1.99E-09 | 16 |
| BP | GO:00901 | 15/88 | 360/1867C | 1.26E-10 | 4.53E-09 | 2.16E-09 | 15 |
| BP | GO:00018 | 11/88 | 152/1867C | 1.35E-10 | 4.83E-09 | 2.30E-09 | 11 |
| BP | GO:00421 | 11/88 | 153/1867C | 1.45E-10 | 5.08E-09 | 2.42E-09 | 11 |
| BP | GO:00620 | 11/88 | 153/1867C | 1.45E-10 | 5.08E-09 | 2.42E-09 | 11 |
| BP | GO:00509 | 17/88 | 499/1867C | 1.47E-10 | 5.11E-09 | 2.44E-09 | 17 |
| BP | GO:00063 | 13/88 | 249/1867C | 1.53E-10 | 5.24E-09 | 2.50E-09 | 13 |
| BP | GO:00713 | 13/88 | 250/1867C | 1.60E-10 | 5.44E-09 | 2.59E-09 | 13 |
| BP | GO:00510 | 16/88 | 432/1867C | 1.62E-10 | 5.44E-09 | 2.59E-09 | 16 |
| BP | GO:00487 | 16/88 | 434/1867C | 1.73E-10 | 5.77E-09 | 2.75E-09 | 16 |
| BP | GO:00356 | 15/88 | 369/1867C | 1.77E-10 | 5.85E-09 | 2.79E-09 | 15 |
| BP | GO:00108 | 10/88 | 117/1867C | 1.89E-10 | 6.20E-09 | 2.96E-09 | 10 |
| BP | GO:00457 | 12/88 | 204/1867C | 2.08E-10 | 6.74E-09 | 3.22E-09 | 12 |
| BP | GO:19010 | 7/88  | 35/18670  | 2.45E-10 | 7.87E-09 | 3.75E-09 | 7  |
| BP | GO:00096 | 12/88 | 210/1867C | 2.90E-10 | 9.25E-09 | 4.41E-09 | 12 |
| BP | GO:00457 | 15/88 | 383/1867C | 2.97E-10 | 9.38E-09 | 4.47E-09 | 15 |
| BP | GO:20012 | 11/88 | 165/1867C | 3.27E-10 | 1.02E-08 | 4.88E-09 | 11 |
| BP | GO:00075 | 13/88 | 270/1867C | 4.15E-10 | 1.28E-08 | 6.12E-09 | 13 |
| BP | GO:00016 | 16/88 | 461/1867C | 4.18E-10 | 1.28E-08 | 6.12E-09 | 16 |
| BP | GO:19030 | 12/88 | 218/1867C | 4.47E-10 | 1.36E-08 | 6.49E-09 | 12 |
| BP | GO:00018 | 16/88 | 464/1867C | 4.59E-10 | 1.39E-08 | 6.61E-09 | 16 |
| BP | GO:00106 | 11/88 | 171/1867C | 4.79E-10 | 1.43E-08 | 6.84E-09 | 11 |
| BP | GO:00030 | 11/88 | 173/1867C | 5.42E-10 | 1.61E-08 | 7.68E-09 | 11 |
| BP | GO:00224 | 15/88 | 403/1867C | 6.00E-10 | 1.75E-08 | 8.35E-09 | 15 |
| BP | GO:00457 | 15/88 | 403/1867C | 6.00E-10 | 1.75E-08 | 8.35E-09 | 15 |
| BP | GO:00327 | 8/88  | 64/18670  | 6.28E-10 | 1.82E-08 | 8.68E-09 | 8  |
| BP | GO:20012 | 11/88 | 179/1867C | 7.80E-10 | 2.24E-08 | 1.07E-08 | 11 |
| BP | GO:00714 | 12/88 | 234/1867C | 1.00E-09 | 2.86E-08 | 1.36E-08 | 12 |
| BP | GO:20000 | 11/88 | 184/1867C | 1.05E-09 | 2.95E-08 | 1.41E-08 | 11 |
| BP | GO:00486 | 9/88  | 101/1867C | 1.11E-09 | 3.10E-08 | 1.48E-08 | 9  |
| BP | GO:00094 | 10/88 | 141/1867C | 1.20E-09 | 3.32E-08 | 1.59E-08 | 10 |
| BP | GO:00320 | 9/88  | 103/1867C | 1.32E-09 | 3.64E-08 | 1.74E-08 | 9  |
| BP | GO:19010 | 7/88  | 44/18670  | 1.35E-09 | 3.69E-08 | 1.76E-08 | 7  |
| BP | GO:00321 | 14/88 | 365/1867C | 1.62E-09 | 4.39E-08 | 2.09E-08 | 14 |
| BP | GO:00301 | 14/88 | 368/1867C | 1.79E-09 | 4.81E-08 | 2.29E-08 | 14 |
| BP | GO:00435 | 10/88 | 147/1867C | 1.80E-09 | 4.81E-08 | 2.29E-08 | 10 |
| BP | GO:00602 | 15/88 | 437/1867C | 1.82E-09 | 4.83E-08 | 2.30E-08 | 15 |
| BP | GO:00069 | 7/88  | 47/18670  | 2.19E-09 | 5.72E-08 | 2.73E-08 | 7  |
| BP | GO:00616 | 7/88  | 47/18670  | 2.19E-09 | 5.72E-08 | 2.73E-08 | 7  |
| BP | GO:00346 | 13/88 | 312/1867C | 2.41E-09 | 6.26E-08 | 2.99E-08 | 13 |
| BP | GO:00469 | 8/88  | 76/18670  | 2.56E-09 | 6.59E-08 | 3.14E-08 | 8  |
| BP | GO:00508 | 13/88 | 314/1867C | 2.61E-09 | 6.66E-08 | 3.18E-08 | 13 |
| BP | GO:00224 | 12/88 | 255/1867C | 2.67E-09 | 6.77E-08 | 3.23E-08 | 12 |

|    |                |           |          |          |          |    |
|----|----------------|-----------|----------|----------|----------|----|
| BP | GO:19028 11/88 | 202/18670 | 2.80E-09 | 7.06E-08 | 3.37E-08 | 11 |
| BP | GO:00512 7/88  | 49/18670  | 2.97E-09 | 7.42E-08 | 3.54E-08 | 7  |
| BP | GO:19049 15/88 | 456/18670 | 3.24E-09 | 8.05E-08 | 3.84E-08 | 15 |
| BP | GO:00321 13/88 | 323/18670 | 3.66E-09 | 9.04E-08 | 4.31E-08 | 13 |
| BP | GO:19038 13/88 | 324/18670 | 3.80E-09 | 9.27E-08 | 4.42E-08 | 13 |
| BP | GO:00076 11/88 | 208/18670 | 3.81E-09 | 9.27E-08 | 4.42E-08 | 11 |
| BP | GO:00075 7/88  | 51/18670  | 3.97E-09 | 9.45E-08 | 4.51E-08 | 7  |
| BP | GO:00481 7/88  | 51/18670  | 3.97E-09 | 9.45E-08 | 4.51E-08 | 7  |
| BP | GO:00509 7/88  | 51/18670  | 3.97E-09 | 9.45E-08 | 4.51E-08 | 7  |
| BP | GO:00082 13/88 | 331/18670 | 4.92E-09 | 1.16E-07 | 5.55E-08 | 13 |
| BP | GO:00018 6/88  | 30/18670  | 5.00E-09 | 1.18E-07 | 5.61E-08 | 6  |
| BP | GO:00433 11/88 | 217/18670 | 5.93E-09 | 1.38E-07 | 6.59E-08 | 11 |
| BP | GO:00343 5/88  | 15/18670  | 6.00E-09 | 1.38E-07 | 6.59E-08 | 5  |
| BP | GO:00973 7/88  | 54/18670  | 6.00E-09 | 1.38E-07 | 6.59E-08 | 7  |
| BP | GO:00025 11/88 | 220/18670 | 6.85E-09 | 1.57E-07 | 7.47E-08 | 11 |
| BP | GO:00086 8/88  | 86/18670  | 6.93E-09 | 1.57E-07 | 7.47E-08 | 8  |
| BP | GO:00905 8/88  | 86/18670  | 6.93E-09 | 1.57E-07 | 7.47E-08 | 8  |
| BP | GO:00192 14/88 | 410/18670 | 7.14E-09 | 1.60E-07 | 7.65E-08 | 14 |
| BP | GO:00507 15/88 | 485/18670 | 7.44E-09 | 1.65E-07 | 7.87E-08 | 15 |
| BP | GO:00512 15/88 | 485/18670 | 7.44E-09 | 1.65E-07 | 7.87E-08 | 15 |
| BP | GO:00103 7/88  | 56/18670  | 7.80E-09 | 1.72E-07 | 8.19E-08 | 7  |
| BP | GO:00486 13/88 | 347/18670 | 8.64E-09 | 1.89E-07 | 9.02E-08 | 13 |
| BP | GO:00512 6/88  | 33/18670  | 9.22E-09 | 2.01E-07 | 9.57E-08 | 6  |
| BP | GO:00018 11/88 | 227/18670 | 9.48E-09 | 2.05E-07 | 9.78E-08 | 11 |
| BP | GO:00316 7/88  | 58/18670  | 1.00E-08 | 2.16E-07 | 1.03E-07 | 7  |
| BP | GO:00430 14/88 | 422/18670 | 1.03E-08 | 2.20E-07 | 1.05E-07 | 14 |
| BP | GO:00015 13/88 | 354/18670 | 1.10E-08 | 2.33E-07 | 1.11E-07 | 13 |
| BP | GO:00018 7/88  | 59/18670  | 1.13E-08 | 2.39E-07 | 1.14E-07 | 7  |
| BP | GO:00106 12/88 | 291/18670 | 1.17E-08 | 2.46E-07 | 1.17E-07 | 12 |
| BP | GO:00487 10/88 | 179/18670 | 1.21E-08 | 2.50E-07 | 1.19E-07 | 10 |
| BP | GO:19030 10/88 | 179/18670 | 1.21E-08 | 2.50E-07 | 1.19E-07 | 10 |
| BP | GO:00094 12/88 | 292/18670 | 1.22E-08 | 2.51E-07 | 1.20E-07 | 12 |
| BP | GO:19021 7/88  | 60/18670  | 1.28E-08 | 2.62E-07 | 1.25E-07 | 7  |
| BP | GO:00070 9/88  | 134/18670 | 1.36E-08 | 2.78E-07 | 1.32E-07 | 9  |
| BP | GO:00082 10/88 | 182/18670 | 1.41E-08 | 2.87E-07 | 1.37E-07 | 10 |
| BP | GO:00900 12/88 | 298/18670 | 1.53E-08 | 3.07E-07 | 1.47E-07 | 12 |
| BP | GO:00181 12/88 | 299/18670 | 1.58E-08 | 3.17E-07 | 1.51E-07 | 12 |
| BP | GO:19026 7/88  | 62/18670  | 1.62E-08 | 3.22E-07 | 1.53E-07 | 7  |
| BP | GO:00346 9/88  | 137/18670 | 1.66E-08 | 3.28E-07 | 1.56E-07 | 9  |
| BP | GO:19054 10/88 | 187/18670 | 1.83E-08 | 3.61E-07 | 1.72E-07 | 10 |
| BP | GO:00357 7/88  | 64/18670  | 2.03E-08 | 3.97E-07 | 1.89E-07 | 7  |
| BP | GO:00421 11/88 | 248/18670 | 2.37E-08 | 4.61E-07 | 2.20E-07 | 11 |
| BP | GO:00308 9/88  | 143/18670 | 2.41E-08 | 4.66E-07 | 2.22E-07 | 9  |
| BP | GO:00459 11/88 | 249/18670 | 2.47E-08 | 4.75E-07 | 2.26E-07 | 11 |
| BP | GO:00454 7/88  | 66/18670  | 2.52E-08 | 4.77E-07 | 2.28E-07 | 7  |
| BP | GO:19021 7/88  | 66/18670  | 2.52E-08 | 4.77E-07 | 2.28E-07 | 7  |
| BP | GO:19057 7/88  | 66/18670  | 2.52E-08 | 4.77E-07 | 2.28E-07 | 7  |
| BP | GO:00026 13/88 | 380/18670 | 2.54E-08 | 4.78E-07 | 2.28E-07 | 13 |
| BP | GO:19020 6/88  | 39/18670  | 2.66E-08 | 4.98E-07 | 2.37E-07 | 6  |
| BP | GO:00094 12/88 | 314/18670 | 2.72E-08 | 5.07E-07 | 2.42E-07 | 12 |
| BP | GO:00421 7/88  | 67/18670  | 2.80E-08 | 5.20E-07 | 2.48E-07 | 7  |
| BP | GO:00026 10/88 | 196/18670 | 2.87E-08 | 5.28E-07 | 2.52E-07 | 10 |
| BP | GO:00551 9/88  | 146/18670 | 2.88E-08 | 5.29E-07 | 2.52E-07 | 9  |
| BP | GO:00086 8/88  | 104/18670 | 3.14E-08 | 5.73E-07 | 2.73E-07 | 8  |
| BP | GO:00610 9/88  | 148/18670 | 3.25E-08 | 5.89E-07 | 2.81E-07 | 9  |
| BP | GO:00426 7/88  | 69/18670  | 3.45E-08 | 6.23E-07 | 2.97E-07 | 7  |
| BP | GO:00182 12/88 | 322/18670 | 3.59E-08 | 6.45E-07 | 3.08E-07 | 12 |
| BP | GO:19028 6/88  | 41/18670  | 3.63E-08 | 6.49E-07 | 3.10E-07 | 6  |

|    |                |           |          |          |          |    |
|----|----------------|-----------|----------|----------|----------|----|
| BP | GO:00508 10/88 | 202/18670 | 3.81E-08 | 6.78E-07 | 3.23E-07 | 10 |
| BP | GO:00508 13/88 | 394/18670 | 3.88E-08 | 6.86E-07 | 3.27E-07 | 13 |
| BP | GO:00513 8/88  | 107/18670 | 3.93E-08 | 6.91E-07 | 3.30E-07 | 8  |
| BP | GO:00105 12/88 | 327/18670 | 4.25E-08 | 7.45E-07 | 3.55E-07 | 12 |
| BP | GO:00015 13/88 | 398/18670 | 4.36E-08 | 7.61E-07 | 3.63E-07 | 13 |
| BP | GO:00611 7/88  | 72/18670  | 4.66E-08 | 8.08E-07 | 3.85E-07 | 7  |
| BP | GO:00020 10/88 | 207/18670 | 4.81E-08 | 8.25E-07 | 3.93E-07 | 10 |
| BP | GO:00714 10/88 | 207/18670 | 4.81E-08 | 8.25E-07 | 3.93E-07 | 10 |
| BP | GO:00086 6/88  | 43/18670  | 4.89E-08 | 8.31E-07 | 3.96E-07 | 6  |
| BP | GO:00454 6/88  | 43/18670  | 4.89E-08 | 8.31E-07 | 3.96E-07 | 6  |
| BP | GO:00712 10/88 | 209/18670 | 5.26E-08 | 8.90E-07 | 4.25E-07 | 10 |
| BP | GO:00512 12/88 | 334/18670 | 5.36E-08 | 9.03E-07 | 4.31E-07 | 12 |
| BP | GO:00434 11/88 | 269/18670 | 5.44E-08 | 9.11E-07 | 4.35E-07 | 11 |
| BP | GO:19044 6/88  | 44/18670  | 5.64E-08 | 9.41E-07 | 4.49E-07 | 6  |
| BP | GO:00075 12/88 | 336/18670 | 5.73E-08 | 9.51E-07 | 4.53E-07 | 12 |
| BP | GO:00466 11/88 | 272/18670 | 6.09E-08 | 1.01E-06 | 4.80E-07 | 11 |
| BP | GO:00329 11/88 | 274/18670 | 6.56E-08 | 1.08E-06 | 5.14E-07 | 11 |
| BP | GO:00075 12/88 | 341/18670 | 6.73E-08 | 1.10E-06 | 5.25E-07 | 12 |
| BP | GO:00508 12/88 | 342/18670 | 6.95E-08 | 1.13E-06 | 5.40E-07 | 12 |
| BP | GO:00319 9/88  | 162/18670 | 7.10E-08 | 1.15E-06 | 5.49E-07 | 9  |
| BP | GO:00362 10/88 | 217/18670 | 7.49E-08 | 1.20E-06 | 5.74E-07 | 10 |
| BP | GO:00509 10/88 | 217/18670 | 7.49E-08 | 1.20E-06 | 5.74E-07 | 10 |
| BP | GO:00000 11/88 | 279/18670 | 7.88E-08 | 1.26E-06 | 6.01E-07 | 11 |
| BP | GO:00301 7/88  | 79/18670  | 8.93E-08 | 1.41E-06 | 6.72E-07 | 7  |
| BP | GO:00435 7/88  | 79/18670  | 8.93E-08 | 1.41E-06 | 6.72E-07 | 7  |
| BP | GO:00712 7/88  | 79/18670  | 8.93E-08 | 1.41E-06 | 6.72E-07 | 7  |
| BP | GO:19000 7/88  | 80/18670  | 9.75E-08 | 1.53E-06 | 7.29E-07 | 7  |
| BP | GO:00513 11/88 | 285/18670 | 9.77E-08 | 1.53E-06 | 7.29E-07 | 11 |
| BP | GO:19054 8/88  | 122/18670 | 1.10E-07 | 1.70E-06 | 8.10E-07 | 8  |
| BP | GO:00350 6/88  | 49/18670  | 1.10E-07 | 1.70E-06 | 8.10E-07 | 6  |
| BP | GO:00420 11/88 | 290/18670 | 1.17E-07 | 1.80E-06 | 8.57E-07 | 11 |
| BP | GO:00094 6/88  | 50/18670  | 1.24E-07 | 1.90E-06 | 9.05E-07 | 6  |
| BP | GO:00511 8/88  | 124/18670 | 1.24E-07 | 1.90E-06 | 9.05E-07 | 8  |
| BP | GO:00313 12/88 | 361/18670 | 1.25E-07 | 1.90E-06 | 9.05E-07 | 12 |
| BP | GO:00069 7/88  | 83/18670  | 1.26E-07 | 1.90E-06 | 9.05E-07 | 7  |
| BP | GO:19007 5/88  | 26/18670  | 1.26E-07 | 1.90E-06 | 9.05E-07 | 5  |
| BP | GO:19007 5/88  | 26/18670  | 1.26E-07 | 1.90E-06 | 9.05E-07 | 5  |
| BP | GO:20001 8/88  | 125/18670 | 1.32E-07 | 1.98E-06 | 9.45E-07 | 8  |
| BP | GO:00508 7/88  | 84/18670  | 1.37E-07 | 2.04E-06 | 9.73E-07 | 7  |
| BP | GO:00424 10/88 | 232/18670 | 1.40E-07 | 2.08E-06 | 9.90E-07 | 10 |
| BP | GO:00068 12/88 | 365/18670 | 1.41E-07 | 2.08E-06 | 9.92E-07 | 12 |
| BP | GO:00019 9/88  | 176/18670 | 1.44E-07 | 2.13E-06 | 1.01E-06 | 9  |
| BP | GO:00448 11/88 | 298/18670 | 1.53E-07 | 2.24E-06 | 1.07E-06 | 11 |
| BP | GO:00706 11/88 | 298/18670 | 1.53E-07 | 2.24E-06 | 1.07E-06 | 11 |
| BP | GO:00705 7/88  | 86/18670  | 1.61E-07 | 2.34E-06 | 1.12E-06 | 7  |
| BP | GO:00714 9/88  | 180/18670 | 1.75E-07 | 2.53E-06 | 1.21E-06 | 9  |
| BP | GO:00105 9/88  | 181/18670 | 1.83E-07 | 2.64E-06 | 1.26E-06 | 9  |
| BP | GO:00603 11/88 | 304/18670 | 1.87E-07 | 2.69E-06 | 1.28E-06 | 11 |
| BP | GO:00971 7/88  | 88/18670  | 1.89E-07 | 2.69E-06 | 1.28E-06 | 7  |
| BP | GO:19040 7/88  | 88/18670  | 1.89E-07 | 2.69E-06 | 1.28E-06 | 7  |
| BP | GO:19028 8/88  | 131/18670 | 1.90E-07 | 2.69E-06 | 1.28E-06 | 8  |
| BP | GO:00525 13/88 | 452/18670 | 1.91E-07 | 2.69E-06 | 1.28E-06 | 13 |
| BP | GO:19046 6/88  | 54/18670  | 1.99E-07 | 2.80E-06 | 1.33E-06 | 6  |
| BP | GO:00420 9/88  | 184/18670 | 2.11E-07 | 2.94E-06 | 1.40E-06 | 9  |
| BP | GO:00434 9/88  | 184/18670 | 2.11E-07 | 2.94E-06 | 1.40E-06 | 9  |
| BP | GO:19030 7/88  | 90/18670  | 2.21E-07 | 3.06E-06 | 1.46E-06 | 7  |
| BP | GO:00106 4/88  | 12/18670  | 2.22E-07 | 3.06E-06 | 1.46E-06 | 4  |
| BP | GO:00015 6/88  | 55/18670  | 2.22E-07 | 3.06E-06 | 1.46E-06 | 6  |

|    |                |           |          |          |          |    |
|----|----------------|-----------|----------|----------|----------|----|
| BP | GO:00105 5/88  | 29/18670  | 2.25E-07 | 3.09E-06 | 1.48E-06 | 5  |
| BP | GO:00485 8/88  | 134/18670 | 2.26E-07 | 3.10E-06 | 1.48E-06 | 8  |
| BP | GO:00303 9/88  | 186/18670 | 2.31E-07 | 3.15E-06 | 1.50E-06 | 9  |
| BP | GO:00066 12/88 | 383/18670 | 2.36E-07 | 3.21E-06 | 1.53E-06 | 12 |
| BP | GO:00509 8/88  | 135/18670 | 2.40E-07 | 3.24E-06 | 1.55E-06 | 8  |
| BP | GO:19016 12/88 | 385/18670 | 2.50E-07 | 3.36E-06 | 1.60E-06 | 12 |
| BP | GO:00726 8/88  | 137/18670 | 2.69E-07 | 3.60E-06 | 1.72E-06 | 8  |
| BP | GO:00435 6/88  | 57/18670  | 2.76E-07 | 3.67E-06 | 1.75E-06 | 6  |
| BP | GO:19034 6/88  | 57/18670  | 2.76E-07 | 3.67E-06 | 1.75E-06 | 6  |
| BP | GO:00332 7/88  | 93/18670  | 2.77E-07 | 3.67E-06 | 1.75E-06 | 7  |
| BP | GO:00457 12/88 | 389/18670 | 2.79E-07 | 3.69E-06 | 1.76E-06 | 12 |
| BP | GO:00019 9/88  | 191/18670 | 2.90E-07 | 3.80E-06 | 1.81E-06 | 9  |
| BP | GO:00425 9/88  | 191/18670 | 2.90E-07 | 3.80E-06 | 1.81E-06 | 9  |
| BP | GO:00331 8/88  | 139/18670 | 3.00E-07 | 3.92E-06 | 1.87E-06 | 8  |
| BP | GO:00327 6/88  | 58/18670  | 3.07E-07 | 3.98E-06 | 1.90E-06 | 6  |
| BP | GO:19020 6/88  | 58/18670  | 3.07E-07 | 3.98E-06 | 1.90E-06 | 6  |
| BP | GO:00109 12/88 | 394/18670 | 3.20E-07 | 4.13E-06 | 1.97E-06 | 12 |
| BP | GO:00705 8/88  | 141/18670 | 3.35E-07 | 4.31E-06 | 2.06E-06 | 8  |
| BP | GO:00977 6/88  | 59/18670  | 3.40E-07 | 4.35E-06 | 2.07E-06 | 6  |
| BP | GO:20003 6/88  | 59/18670  | 3.40E-07 | 4.35E-06 | 2.07E-06 | 6  |
| BP | GO:00068 10/88 | 256/18670 | 3.48E-07 | 4.43E-06 | 2.11E-06 | 10 |
| BP | GO:00159 7/88  | 97/18670  | 3.70E-07 | 4.69E-06 | 2.24E-06 | 7  |
| BP | GO:00108 12/88 | 400/18670 | 3.76E-07 | 4.75E-06 | 2.27E-06 | 12 |
| BP | GO:00459 5/88  | 32/18670  | 3.78E-07 | 4.76E-06 | 2.27E-06 | 5  |
| BP | GO:20012 7/88  | 98/18670  | 3.97E-07 | 4.98E-06 | 2.37E-06 | 7  |
| BP | GO:20012 6/88  | 61/18670  | 4.16E-07 | 5.21E-06 | 2.48E-06 | 6  |
| BP | GO:00016 11/88 | 330/18670 | 4.24E-07 | 5.29E-06 | 2.52E-06 | 11 |
| BP | GO:00513 8/88  | 146/18670 | 4.37E-07 | 5.43E-06 | 2.59E-06 | 8  |
| BP | GO:00468 6/88  | 62/18670  | 4.59E-07 | 5.68E-06 | 2.71E-06 | 6  |
| BP | GO:00303 11/88 | 334/18670 | 4.78E-07 | 5.90E-06 | 2.81E-06 | 11 |
| BP | GO:00140 8/88  | 148/18670 | 4.85E-07 | 5.96E-06 | 2.84E-06 | 8  |
| BP | GO:19034 7/88  | 101/18670 | 4.87E-07 | 5.97E-06 | 2.85E-06 | 7  |
| BP | GO:00092 8/88  | 149/18670 | 5.11E-07 | 6.21E-06 | 2.96E-06 | 8  |
| BP | GO:00140 8/88  | 149/18670 | 5.11E-07 | 6.21E-06 | 2.96E-06 | 8  |
| BP | GO:00105 5/88  | 34/18670  | 5.18E-07 | 6.28E-06 | 2.99E-06 | 5  |
| BP | GO:00459 11/88 | 338/18670 | 5.38E-07 | 6.49E-06 | 3.10E-06 | 11 |
| BP | GO:00061 9/88  | 206/18670 | 5.48E-07 | 6.53E-06 | 3.11E-06 | 9  |
| BP | GO:00506 9/88  | 206/18670 | 5.48E-07 | 6.53E-06 | 3.11E-06 | 9  |
| BP | GO:00069 13/88 | 496/18670 | 5.48E-07 | 6.53E-06 | 3.11E-06 | 13 |
| BP | GO:00619 13/88 | 496/18670 | 5.48E-07 | 6.53E-06 | 3.11E-06 | 13 |
| BP | GO:00506 9/88  | 208/18670 | 5.94E-07 | 7.05E-06 | 3.36E-06 | 9  |
| BP | GO:00018 5/88  | 35/18670  | 6.02E-07 | 7.13E-06 | 3.40E-06 | 5  |
| BP | GO:00725 6/88  | 65/18670  | 6.10E-07 | 7.19E-06 | 3.43E-06 | 6  |
| BP | GO:00329 9/88  | 209/18670 | 6.18E-07 | 7.27E-06 | 3.47E-06 | 9  |
| BP | GO:00435 10/88 | 273/18670 | 6.27E-07 | 7.35E-06 | 3.51E-06 | 10 |
| BP | GO:00331 7/88  | 105/18670 | 6.35E-07 | 7.42E-06 | 3.54E-06 | 7  |
| BP | GO:00098 12/88 | 423/18670 | 6.79E-07 | 7.91E-06 | 3.77E-06 | 12 |
| BP | GO:00105 5/88  | 36/18670  | 6.97E-07 | 8.03E-06 | 3.83E-06 | 5  |
| BP | GO:19010 5/88  | 36/18670  | 6.97E-07 | 8.03E-06 | 3.83E-06 | 5  |
| BP | GO:20012 5/88  | 36/18670  | 6.97E-07 | 8.03E-06 | 3.83E-06 | 5  |
| BP | GO:00435 8/88  | 156/18670 | 7.24E-07 | 8.32E-06 | 3.97E-06 | 8  |
| BP | GO:00486 6/88  | 67/18670  | 7.31E-07 | 8.37E-06 | 3.99E-06 | 6  |
| BP | GO:20001 11/88 | 349/18670 | 7.37E-07 | 8.41E-06 | 4.01E-06 | 11 |
| BP | GO:19059 8/88  | 157/18670 | 7.60E-07 | 8.65E-06 | 4.12E-06 | 8  |
| BP | GO:00432 9/88  | 215/18670 | 7.83E-07 | 8.88E-06 | 4.23E-06 | 9  |
| BP | GO:00305 10/88 | 280/18670 | 7.90E-07 | 8.93E-06 | 4.26E-06 | 10 |
| BP | GO:00434 8/88  | 158/18670 | 7.98E-07 | 8.99E-06 | 4.29E-06 | 8  |
| BP | GO:00100 9/88  | 218/18670 | 8.79E-07 | 9.87E-06 | 4.71E-06 | 9  |

|    |                |           |          |          |          |    |
|----|----------------|-----------|----------|----------|----------|----|
| BP | GO:00349 10/88 | 285/18670 | 9.28E-07 | 1.04E-05 | 4.95E-06 | 10 |
| BP | GO:00706 9/88  | 222/18670 | 1.02E-06 | 1.14E-05 | 5.44E-06 | 9  |
| BP | GO:00316 4/88  | 17/18670  | 1.05E-06 | 1.16E-05 | 5.55E-06 | 4  |
| BP | GO:00458 11/88 | 363/18670 | 1.08E-06 | 1.20E-05 | 5.73E-06 | 11 |
| BP | GO:00070 8/88  | 165/18670 | 1.11E-06 | 1.22E-05 | 5.81E-06 | 8  |
| BP | GO:00026 7/88  | 114/18670 | 1.11E-06 | 1.22E-05 | 5.81E-06 | 7  |
| BP | GO:00420 7/88  | 114/18670 | 1.11E-06 | 1.22E-05 | 5.81E-06 | 7  |
| BP | GO:00713 10/88 | 291/18670 | 1.12E-06 | 1.23E-05 | 5.85E-06 | 10 |
| BP | GO:00518 6/88  | 72/18670  | 1.12E-06 | 1.23E-05 | 5.85E-06 | 6  |
| BP | GO:19019 12/88 | 444/18670 | 1.13E-06 | 1.23E-05 | 5.86E-06 | 12 |
| BP | GO:00329 7/88  | 115/18670 | 1.18E-06 | 1.28E-05 | 6.09E-06 | 7  |
| BP | GO:00068 6/88  | 73/18670  | 1.22E-06 | 1.32E-05 | 6.29E-06 | 6  |
| BP | GO:01500 6/88  | 75/18670  | 1.43E-06 | 1.54E-05 | 7.36E-06 | 6  |
| BP | GO:00162 8/88  | 171/18670 | 1.45E-06 | 1.56E-05 | 7.43E-06 | 8  |
| BP | GO:00610 6/88  | 76/18670  | 1.55E-06 | 1.66E-05 | 7.91E-06 | 6  |
| BP | GO:00226 7/88  | 120/18670 | 1.57E-06 | 1.67E-05 | 7.99E-06 | 7  |
| BP | GO:00097 9/88  | 235/18670 | 1.64E-06 | 1.75E-05 | 8.32E-06 | 9  |
| BP | GO:00070 9/88  | 237/18670 | 1.76E-06 | 1.87E-05 | 8.90E-06 | 9  |
| BP | GO:00420 7/88  | 123/18670 | 1.85E-06 | 1.96E-05 | 9.34E-06 | 7  |
| BP | GO:00512 11/88 | 384/18670 | 1.87E-06 | 1.98E-05 | 9.42E-06 | 11 |
| BP | GO:20001 9/88  | 239/18670 | 1.88E-06 | 1.98E-05 | 9.45E-06 | 9  |
| BP | GO:00140 7/88  | 124/18670 | 1.95E-06 | 2.04E-05 | 9.72E-06 | 7  |
| BP | GO:00421 7/88  | 124/18670 | 1.95E-06 | 2.04E-05 | 9.72E-06 | 7  |
| BP | GO:00423 12/88 | 468/18670 | 1.96E-06 | 2.04E-05 | 9.72E-06 | 12 |
| BP | GO:00454 7/88  | 125/18670 | 2.06E-06 | 2.14E-05 | 1.02E-05 | 7  |
| BP | GO:00435 8/88  | 180/18670 | 2.13E-06 | 2.20E-05 | 1.05E-05 | 8  |
| BP | GO:00713 8/88  | 180/18670 | 2.13E-06 | 2.20E-05 | 1.05E-05 | 8  |
| BP | GO:00480 8/88  | 181/18670 | 2.22E-06 | 2.29E-05 | 1.09E-05 | 8  |
| BP | GO:00323 7/88  | 127/18670 | 2.29E-06 | 2.36E-05 | 1.12E-05 | 7  |
| BP | GO:00488 9/88  | 246/18670 | 2.39E-06 | 2.45E-05 | 1.17E-05 | 9  |
| BP | GO:00105 7/88  | 128/18670 | 2.42E-06 | 2.46E-05 | 1.17E-05 | 7  |
| BP | GO:00326 6/88  | 82/18670  | 2.42E-06 | 2.46E-05 | 1.17E-05 | 6  |
| BP | GO:00069 5/88  | 46/18670  | 2.44E-06 | 2.46E-05 | 1.17E-05 | 5  |
| BP | GO:00226 5/88  | 46/18670  | 2.44E-06 | 2.46E-05 | 1.17E-05 | 5  |
| BP | GO:00457 5/88  | 46/18670  | 2.44E-06 | 2.46E-05 | 1.17E-05 | 5  |
| BP | GO:00604 5/88  | 46/18670  | 2.44E-06 | 2.46E-05 | 1.17E-05 | 5  |
| BP | GO:00480 8/88  | 184/18670 | 2.51E-06 | 2.52E-05 | 1.20E-05 | 8  |
| BP | GO:00400 11/88 | 396/18670 | 2.52E-06 | 2.52E-05 | 1.20E-05 | 11 |
| BP | GO:19019 12/88 | 480/18670 | 2.54E-06 | 2.53E-05 | 1.21E-05 | 12 |
| BP | GO:00347 7/88  | 129/18670 | 2.55E-06 | 2.53E-05 | 1.21E-05 | 7  |
| BP | GO:00550 4/88  | 21/18670  | 2.59E-06 | 2.57E-05 | 1.23E-05 | 4  |
| BP | GO:00459 6/88  | 83/18670  | 2.60E-06 | 2.58E-05 | 1.23E-05 | 6  |
| BP | GO:00506 7/88  | 130/18670 | 2.68E-06 | 2.65E-05 | 1.26E-05 | 7  |
| BP | GO:20012 5/88  | 47/18670  | 2.72E-06 | 2.68E-05 | 1.28E-05 | 5  |
| BP | GO:00329 7/88  | 131/18670 | 2.82E-06 | 2.77E-05 | 1.32E-05 | 7  |
| BP | GO:19047 6/88  | 85/18670  | 2.99E-06 | 2.92E-05 | 1.39E-05 | 6  |
| BP | GO:19908 6/88  | 85/18670  | 2.99E-06 | 2.92E-05 | 1.39E-05 | 6  |
| BP | GO:00901 5/88  | 48/18670  | 3.03E-06 | 2.95E-05 | 1.40E-05 | 5  |
| BP | GO:00519 9/88  | 254/18670 | 3.11E-06 | 3.01E-05 | 1.44E-05 | 9  |
| BP | GO:00108 4/88  | 22/18670  | 3.16E-06 | 3.05E-05 | 1.45E-05 | 4  |
| BP | GO:00713 4/88  | 22/18670  | 3.16E-06 | 3.05E-05 | 1.45E-05 | 4  |
| BP | GO:00424 6/88  | 86/18670  | 3.21E-06 | 3.09E-05 | 1.47E-05 | 6  |
| BP | GO:00323 7/88  | 134/18670 | 3.28E-06 | 3.14E-05 | 1.50E-05 | 7  |
| BP | GO:00466 7/88  | 134/18670 | 3.28E-06 | 3.14E-05 | 1.50E-05 | 7  |
| BP | GO:00507 9/88  | 256/18670 | 3.31E-06 | 3.16E-05 | 1.51E-05 | 9  |
| BP | GO:00973 5/88  | 49/18670  | 3.36E-06 | 3.20E-05 | 1.52E-05 | 5  |
| BP | GO:00018 6/88  | 87/18670  | 3.43E-06 | 3.26E-05 | 1.55E-05 | 6  |
| BP | GO:00512 10/88 | 330/18670 | 3.46E-06 | 3.28E-05 | 1.56E-05 | 10 |

|    |                |           |          |          |          |    |
|----|----------------|-----------|----------|----------|----------|----|
| BP | GO:00901 10/88 | 332/18670 | 3.65E-06 | 3.45E-05 | 1.64E-05 | 10 |
| BP | GO:00510 9/88  | 261/18670 | 3.88E-06 | 3.65E-05 | 1.74E-05 | 9  |
| BP | GO:00326 6/88  | 89/18670  | 3.92E-06 | 3.68E-05 | 1.76E-05 | 6  |
| BP | GO:00085 7/88  | 138/18670 | 3.99E-06 | 3.74E-05 | 1.78E-05 | 7  |
| BP | GO:00465 7/88  | 139/18670 | 4.18E-06 | 3.90E-05 | 1.86E-05 | 7  |
| BP | GO:00706 7/88  | 139/18670 | 4.18E-06 | 3.90E-05 | 1.86E-05 | 7  |
| BP | GO:00512 11/88 | 418/18670 | 4.23E-06 | 3.93E-05 | 1.88E-05 | 11 |
| BP | GO:00310 8/88  | 198/18670 | 4.32E-06 | 4.01E-05 | 1.91E-05 | 8  |
| BP | GO:00149 6/88  | 91/18670  | 4.46E-06 | 4.10E-05 | 1.96E-05 | 6  |
| BP | GO:00456 6/88  | 91/18670  | 4.46E-06 | 4.10E-05 | 1.96E-05 | 6  |
| BP | GO:00603 6/88  | 91/18670  | 4.46E-06 | 4.10E-05 | 1.96E-05 | 6  |
| BP | GO:00343 8/88  | 199/18670 | 4.49E-06 | 4.11E-05 | 1.96E-05 | 8  |
| BP | GO:00468 9/88  | 266/18670 | 4.52E-06 | 4.14E-05 | 1.97E-05 | 9  |
| BP | GO:00466 4/88  | 24/18670  | 4.56E-06 | 4.16E-05 | 1.98E-05 | 4  |
| BP | GO:00313 9/88  | 268/18670 | 4.81E-06 | 4.37E-05 | 2.09E-05 | 9  |
| BP | GO:00381 7/88  | 142/18670 | 4.82E-06 | 4.37E-05 | 2.09E-05 | 7  |
| BP | GO:00525 11/88 | 425/18670 | 4.96E-06 | 4.49E-05 | 2.14E-05 | 11 |
| BP | GO:00301 5/88  | 53/18670  | 4.98E-06 | 4.50E-05 | 2.14E-05 | 5  |
| BP | GO:00364 6/88  | 93/18670  | 5.06E-06 | 4.56E-05 | 2.17E-05 | 6  |
| BP | GO:00485 11/88 | 428/18670 | 5.30E-06 | 4.76E-05 | 2.27E-05 | 11 |
| BP | GO:00352 8/88  | 204/18670 | 5.39E-06 | 4.83E-05 | 2.30E-05 | 8  |
| BP | GO:00019 11/88 | 429/18670 | 5.42E-06 | 4.84E-05 | 2.31E-05 | 11 |
| BP | GO:00027 5/88  | 54/18670  | 5.47E-06 | 4.86E-05 | 2.32E-05 | 5  |
| BP | GO:19000 5/88  | 54/18670  | 5.47E-06 | 4.86E-05 | 2.32E-05 | 5  |
| BP | GO:00719 7/88  | 145/18670 | 5.53E-06 | 4.91E-05 | 2.34E-05 | 7  |
| BP | GO:00425 7/88  | 146/18670 | 5.79E-06 | 5.11E-05 | 2.44E-05 | 7  |
| BP | GO:00458 7/88  | 146/18670 | 5.79E-06 | 5.11E-05 | 2.44E-05 | 7  |
| BP | GO:00432 9/88  | 275/18670 | 5.92E-06 | 5.21E-05 | 2.49E-05 | 9  |
| BP | GO:00192 6/88  | 96/18670  | 6.09E-06 | 5.33E-05 | 2.54E-05 | 6  |
| BP | GO:00480 6/88  | 96/18670  | 6.09E-06 | 5.33E-05 | 2.54E-05 | 6  |
| BP | GO:00301 4/88  | 26/18670  | 6.36E-06 | 5.53E-05 | 2.64E-05 | 4  |
| BP | GO:00328 4/88  | 26/18670  | 6.36E-06 | 5.53E-05 | 2.64E-05 | 4  |
| BP | GO:19000 4/88  | 26/18670  | 6.36E-06 | 5.53E-05 | 2.64E-05 | 4  |
| BP | GO:00315 10/88 | 354/18670 | 6.43E-06 | 5.58E-05 | 2.66E-05 | 10 |
| BP | GO:00604 9/88  | 278/18670 | 6.47E-06 | 5.59E-05 | 2.67E-05 | 9  |
| BP | GO:00069 5/88  | 56/18670  | 6.56E-06 | 5.66E-05 | 2.70E-05 | 5  |
| BP | GO:00975 8/88  | 210/18670 | 6.67E-06 | 5.74E-05 | 2.74E-05 | 8  |
| BP | GO:00199 11/88 | 439/18670 | 6.74E-06 | 5.79E-05 | 2.76E-05 | 11 |
| BP | GO:00301 9/88  | 281/18670 | 7.05E-06 | 6.04E-05 | 2.88E-05 | 9  |
| BP | GO:00508 5/88  | 57/18670  | 7.16E-06 | 6.07E-05 | 2.90E-05 | 5  |
| BP | GO:00713 5/88  | 57/18670  | 7.16E-06 | 6.07E-05 | 2.90E-05 | 5  |
| BP | GO:00724 5/88  | 57/18670  | 7.16E-06 | 6.07E-05 | 2.90E-05 | 5  |
| BP | GO:19024 5/88  | 57/18670  | 7.16E-06 | 6.07E-05 | 2.90E-05 | 5  |
| BP | GO:00468 4/88  | 27/18670  | 7.44E-06 | 6.27E-05 | 2.99E-05 | 4  |
| BP | GO:00508 4/88  | 27/18670  | 7.44E-06 | 6.27E-05 | 2.99E-05 | 4  |
| BP | GO:19021 4/88  | 27/18670  | 7.44E-06 | 6.27E-05 | 2.99E-05 | 4  |
| BP | GO:00192 5/88  | 58/18670  | 7.81E-06 | 6.54E-05 | 3.12E-05 | 5  |
| BP | GO:19037 5/88  | 58/18670  | 7.81E-06 | 6.54E-05 | 3.12E-05 | 5  |
| BP | GO:00301 7/88  | 153/18670 | 7.88E-06 | 6.57E-05 | 3.13E-05 | 7  |
| BP | GO:00458 7/88  | 153/18670 | 7.88E-06 | 6.57E-05 | 3.13E-05 | 7  |
| BP | GO:00181 10/88 | 363/18670 | 8.01E-06 | 6.67E-05 | 3.18E-05 | 10 |
| BP | GO:00000 8/88  | 216/18670 | 8.19E-06 | 6.80E-05 | 3.24E-05 | 8  |
| BP | GO:00060 10/88 | 364/18670 | 8.21E-06 | 6.80E-05 | 3.24E-05 | 10 |
| BP | GO:00724 5/88  | 59/18670  | 8.50E-06 | 6.99E-05 | 3.33E-05 | 5  |
| BP | GO:19024 5/88  | 59/18670  | 8.50E-06 | 6.99E-05 | 3.33E-05 | 5  |
| BP | GO:19024 5/88  | 59/18670  | 8.50E-06 | 6.99E-05 | 3.33E-05 | 5  |
| BP | GO:00182 10/88 | 366/18670 | 8.61E-06 | 7.05E-05 | 3.36E-05 | 10 |
| BP | GO:00327 4/88  | 28/18670  | 8.65E-06 | 7.05E-05 | 3.36E-05 | 4  |



|    |          |       |           |          |          |          |    |
|----|----------|-------|-----------|----------|----------|----------|----|
| BP | GO:00362 | 4/88  | 28/18670  | 8.65E-06 | 7.05E-05 | 3.36E-05 | 4  |
| BP | GO:00427 | 4/88  | 28/18670  | 8.65E-06 | 7.05E-05 | 3.36E-05 | 4  |
| BP | GO:00072 | 7/88  | 156/18670 | 8.95E-06 | 7.26E-05 | 3.46E-05 | 7  |
| BP | GO:00421 | 7/88  | 156/18670 | 8.95E-06 | 7.26E-05 | 3.46E-05 | 7  |
| BP | GO:00432 | 7/88  | 157/18670 | 9.33E-06 | 7.55E-05 | 3.60E-05 | 7  |
| BP | GO:00148 | 6/88  | 104/18670 | 9.67E-06 | 7.77E-05 | 3.71E-05 | 6  |
| BP | GO:00468 | 6/88  | 104/18670 | 9.67E-06 | 7.77E-05 | 3.71E-05 | 6  |
| BP | GO:00718 | 6/88  | 104/18670 | 9.67E-06 | 7.77E-05 | 3.71E-05 | 6  |
| BP | GO:00903 | 5/88  | 61/18670  | 1.00E-05 | 8.04E-05 | 3.83E-05 | 5  |
| BP | GO:00017 | 10/88 | 373/18670 | 1.02E-05 | 8.12E-05 | 3.87E-05 | 10 |
| BP | GO:00466 | 7/88  | 160/18670 | 1.06E-05 | 8.43E-05 | 4.02E-05 | 7  |
| BP | GO:00305 | 8/88  | 224/18670 | 1.07E-05 | 8.50E-05 | 4.06E-05 | 8  |
| BP | GO:00447 | 6/88  | 106/18670 | 1.08E-05 | 8.57E-05 | 4.09E-05 | 6  |
| BP | GO:00022 | 5/88  | 62/18670  | 1.09E-05 | 8.59E-05 | 4.10E-05 | 5  |
| BP | GO:00702 | 5/88  | 62/18670  | 1.09E-05 | 8.59E-05 | 4.10E-05 | 5  |
| BP | GO:00071 | 8/88  | 225/18670 | 1.10E-05 | 8.70E-05 | 4.15E-05 | 8  |
| BP | GO:00157 | 7/88  | 162/18670 | 1.15E-05 | 9.01E-05 | 4.30E-05 | 7  |
| BP | GO:00017 | 4/88  | 30/18670  | 1.15E-05 | 9.01E-05 | 4.30E-05 | 4  |
| BP | GO:00714 | 4/88  | 30/18670  | 1.15E-05 | 9.01E-05 | 4.30E-05 | 4  |
| BP | GO:00315 | 5/88  | 63/18670  | 1.18E-05 | 9.17E-05 | 4.37E-05 | 5  |
| BP | GO:00448 | 5/88  | 63/18670  | 1.18E-05 | 9.17E-05 | 4.37E-05 | 5  |
| BP | GO:00016 | 3/88  | 10/18670  | 1.19E-05 | 9.19E-05 | 4.38E-05 | 3  |
| BP | GO:00320 | 3/88  | 10/18670  | 1.19E-05 | 9.19E-05 | 4.38E-05 | 3  |
| BP | GO:00519 | 3/88  | 10/18670  | 1.19E-05 | 9.19E-05 | 4.38E-05 | 3  |
| BP | GO:00459 | 7/88  | 163/18670 | 1.19E-05 | 9.22E-05 | 4.40E-05 | 7  |
| BP | GO:00432 | 11/88 | 467/18670 | 1.20E-05 | 9.29E-05 | 4.43E-05 | 11 |
| BP | GO:00358 | 7/88  | 164/18670 | 1.24E-05 | 9.55E-05 | 4.55E-05 | 7  |
| BP | GO:00105 | 8/88  | 229/18670 | 1.25E-05 | 9.63E-05 | 4.59E-05 | 8  |
| BP | GO:00447 | 5/88  | 64/18670  | 1.27E-05 | 9.74E-05 | 4.64E-05 | 5  |
| BP | GO:00101 | 4/88  | 31/18670  | 1.32E-05 | 0.0001   | 4.78E-05 | 4  |
| BP | GO:00346 | 4/88  | 31/18670  | 1.32E-05 | 0.0001   | 4.78E-05 | 4  |
| BP | GO:19028 | 4/88  | 31/18670  | 1.32E-05 | 0.0001   | 4.78E-05 | 4  |
| BP | GO:00507 | 11/88 | 472/18670 | 1.33E-05 | 0.000101 | 4.82E-05 | 11 |
| BP | GO:00161 | 6/88  | 110/18670 | 1.33E-05 | 0.000101 | 4.83E-05 | 6  |
| BP | GO:00976 | 7/88  | 166/18670 | 1.34E-05 | 0.000102 | 4.84E-05 | 7  |
| BP | GO:00091 | 10/88 | 386/18670 | 1.37E-05 | 0.000103 | 4.92E-05 | 10 |
| BP | GO:19015 | 7/88  | 167/18670 | 1.40E-05 | 0.000105 | 5.01E-05 | 7  |
| BP | GO:00098 | 9/88  | 308/18670 | 1.47E-05 | 0.00011  | 5.27E-05 | 9  |
| BP | GO:00019 | 6/88  | 112/18670 | 1.48E-05 | 0.000111 | 5.29E-05 | 6  |
| BP | GO:19012 | 10/88 | 390/18670 | 1.49E-05 | 0.000112 | 5.33E-05 | 10 |
| BP | GO:00507 | 7/88  | 169/18670 | 1.51E-05 | 0.000113 | 5.37E-05 | 7  |
| BP | GO:00064 | 8/88  | 235/18670 | 1.51E-05 | 0.000113 | 5.37E-05 | 8  |
| BP | GO:00432 | 6/88  | 113/18670 | 1.56E-05 | 0.000116 | 5.52E-05 | 6  |
| BP | GO:00197 | 5/88  | 67/18670  | 1.59E-05 | 0.000118 | 5.63E-05 | 5  |
| BP | GO:00468 | 3/88  | 11/18670  | 1.62E-05 | 0.00012  | 5.72E-05 | 3  |
| BP | GO:00607 | 3/88  | 11/18670  | 1.62E-05 | 0.00012  | 5.72E-05 | 3  |
| BP | GO:00468 | 9/88  | 312/18670 | 1.63E-05 | 0.00012  | 5.72E-05 | 9  |
| BP | GO:00066 | 6/88  | 114/18670 | 1.64E-05 | 0.00012  | 5.73E-05 | 6  |
| BP | GO:00427 | 6/88  | 114/18670 | 1.64E-05 | 0.00012  | 5.73E-05 | 6  |
| BP | GO:00100 | 4/88  | 33/18670  | 1.70E-05 | 0.000124 | 5.94E-05 | 4  |
| BP | GO:00199 | 5/88  | 68/18670  | 1.71E-05 | 0.000125 | 5.97E-05 | 5  |
| BP | GO:00075 | 6/88  | 116/18670 | 1.81E-05 | 0.000132 | 6.28E-05 | 6  |
| BP | GO:19001 | 6/88  | 116/18670 | 1.81E-05 | 0.000132 | 6.28E-05 | 6  |
| BP | GO:00105 | 6/88  | 117/18670 | 1.90E-05 | 0.000137 | 6.55E-05 | 6  |
| BP | GO:00109 | 6/88  | 117/18670 | 1.90E-05 | 0.000137 | 6.55E-05 | 6  |
| BP | GO:19003 | 6/88  | 117/18670 | 1.90E-05 | 0.000137 | 6.55E-05 | 6  |
| BP | GO:00432 | 4/88  | 34/18670  | 1.92E-05 | 0.000139 | 6.61E-05 | 4  |
| BP | GO:00518 | 7/88  | 176/18670 | 1.96E-05 | 0.000141 | 6.74E-05 | 7  |

|    |                |           |          |          |          |    |
|----|----------------|-----------|----------|----------|----------|----|
| BP | GO:00341 5/88  | 70/18670  | 1.97E-05 | 0.000142 | 6.75E-05 | 5  |
| BP | GO:00507 5/88  | 70/18670  | 1.97E-05 | 0.000142 | 6.75E-05 | 5  |
| BP | GO:00518 8/88  | 244/18670 | 1.98E-05 | 0.000142 | 6.77E-05 | 8  |
| BP | GO:00308 6/88  | 118/18670 | 1.99E-05 | 0.000142 | 6.79E-05 | 6  |
| BP | GO:00484 7/88  | 177/18670 | 2.03E-05 | 0.000145 | 6.92E-05 | 7  |
| BP | GO:00099 9/88  | 322/18670 | 2.09E-05 | 0.000149 | 7.09E-05 | 9  |
| BP | GO:00069 3/88  | 12/18670  | 2.16E-05 | 0.000153 | 7.30E-05 | 3  |
| BP | GO:00450 3/88  | 12/18670  | 2.16E-05 | 0.000153 | 7.30E-05 | 3  |
| BP | GO:00972 8/88  | 247/18670 | 2.16E-05 | 0.000153 | 7.30E-05 | 8  |
| BP | GO:00510 7/88  | 179/18670 | 2.19E-05 | 0.000154 | 7.34E-05 | 7  |
| BP | GO:00713 7/88  | 179/18670 | 2.19E-05 | 0.000154 | 7.34E-05 | 7  |
| BP | GO:00030 6/88  | 120/18670 | 2.19E-05 | 0.000154 | 7.34E-05 | 6  |
| BP | GO:00067 6/88  | 120/18670 | 2.19E-05 | 0.000154 | 7.34E-05 | 6  |
| BP | GO:19019 8/88  | 248/18670 | 2.23E-05 | 0.000156 | 7.44E-05 | 8  |
| BP | GO:19037 5/88  | 72/18670  | 2.26E-05 | 0.000158 | 7.55E-05 | 5  |
| BP | GO:00027 11/88 | 500/18670 | 2.27E-05 | 0.000158 | 7.55E-05 | 11 |
| BP | GO:00193 8/88  | 249/18670 | 2.29E-05 | 0.00016  | 7.61E-05 | 8  |
| BP | GO:00096 9/88  | 326/18670 | 2.30E-05 | 0.00016  | 7.63E-05 | 9  |
| BP | GO:00190 9/88  | 328/18670 | 2.41E-05 | 0.000167 | 7.95E-05 | 9  |
| BP | GO:00436 5/88  | 73/18670  | 2.42E-05 | 0.000167 | 7.95E-05 | 5  |
| BP | GO:00724 5/88  | 73/18670  | 2.42E-05 | 0.000167 | 7.95E-05 | 5  |
| BP | GO:00724 5/88  | 73/18670  | 2.42E-05 | 0.000167 | 7.95E-05 | 5  |
| BP | GO:19035 5/88  | 73/18670  | 2.42E-05 | 0.000167 | 7.95E-05 | 5  |
| BP | GO:00723 5/88  | 74/18670  | 2.59E-05 | 0.000177 | 8.44E-05 | 5  |
| BP | GO:19001 5/88  | 74/18670  | 2.59E-05 | 0.000177 | 8.44E-05 | 5  |
| BP | GO:19030 5/88  | 74/18670  | 2.59E-05 | 0.000177 | 8.44E-05 | 5  |
| BP | GO:00300 10/88 | 416/18670 | 2.60E-05 | 0.000177 | 8.46E-05 | 10 |
| BP | GO:00328 4/88  | 37/18670  | 2.70E-05 | 0.000183 | 8.71E-05 | 4  |
| BP | GO:00344 4/88  | 37/18670  | 2.70E-05 | 0.000183 | 8.71E-05 | 4  |
| BP | GO:00430 4/88  | 37/18670  | 2.70E-05 | 0.000183 | 8.71E-05 | 4  |
| BP | GO:00459 4/88  | 37/18670  | 2.70E-05 | 0.000183 | 8.71E-05 | 4  |
| BP | GO:20002 4/88  | 37/18670  | 2.70E-05 | 0.000183 | 8.71E-05 | 4  |
| BP | GO:00719 9/88  | 334/18670 | 2.78E-05 | 0.000187 | 8.93E-05 | 9  |
| BP | GO:00306 3/88  | 13/18670  | 2.80E-05 | 0.000187 | 8.93E-05 | 3  |
| BP | GO:00903 3/88  | 13/18670  | 2.80E-05 | 0.000187 | 8.93E-05 | 3  |
| BP | GO:00905 3/88  | 13/18670  | 2.80E-05 | 0.000187 | 8.93E-05 | 3  |
| BP | GO:19029 3/88  | 13/18670  | 2.80E-05 | 0.000187 | 8.93E-05 | 3  |
| BP | GO:00336 8/88  | 257/18670 | 2.87E-05 | 0.000192 | 9.16E-05 | 8  |
| BP | GO:00423 5/88  | 76/18670  | 2.94E-05 | 0.000196 | 9.37E-05 | 5  |
| BP | GO:00323 4/88  | 38/18670  | 3.01E-05 | 0.0002   | 9.56E-05 | 4  |
| BP | GO:00486 5/88  | 77/18670  | 3.14E-05 | 0.000209 | 9.95E-05 | 5  |
| BP | GO:00026 6/88  | 128/18670 | 3.16E-05 | 0.00021  | 1.00E-04 | 6  |
| BP | GO:00345 8/88  | 262/18670 | 3.30E-05 | 0.000218 | 0.000104 | 8  |
| BP | GO:00510 10/88 | 428/18670 | 3.31E-05 | 0.000219 | 0.000104 | 10 |
| BP | GO:00714 7/88  | 191/18670 | 3.31E-05 | 0.000219 | 0.000104 | 7  |
| BP | GO:00723 5/88  | 78/18670  | 3.34E-05 | 0.00022  | 0.000105 | 5  |
| BP | GO:00510 10/88 | 429/18670 | 3.37E-05 | 0.000222 | 0.000106 | 10 |
| BP | GO:00723 9/88  | 343/18670 | 3.43E-05 | 0.000224 | 0.000107 | 9  |
| BP | GO:00507 7/88  | 192/18670 | 3.43E-05 | 0.000224 | 0.000107 | 7  |
| BP | GO:00519 3/88  | 14/18670  | 3.55E-05 | 0.000232 | 0.000111 | 3  |
| BP | GO:00714 4/88  | 40/18670  | 3.70E-05 | 0.000241 | 0.000115 | 4  |
| BP | GO:00423 10/88 | 434/18670 | 3.72E-05 | 0.000242 | 0.000115 | 10 |
| BP | GO:19019 8/88  | 267/18670 | 3.77E-05 | 0.000245 | 0.000117 | 8  |
| BP | GO:00434 10/88 | 436/18670 | 3.87E-05 | 0.000251 | 0.00012  | 10 |
| BP | GO:00066 7/88  | 196/18670 | 3.91E-05 | 0.000253 | 0.000121 | 7  |
| BP | GO:00427 6/88  | 133/18670 | 3.92E-05 | 0.000253 | 0.000121 | 6  |
| BP | GO:00487 5/88  | 81/18670  | 4.01E-05 | 0.000259 | 0.000123 | 5  |
| BP | GO:00109 7/88  | 197/18670 | 4.04E-05 | 0.00026  | 0.000124 | 7  |

|    |          |       |           |          |          |          |    |
|----|----------|-------|-----------|----------|----------|----------|----|
| BP | GO:00459 | 8/88  | 270/18670 | 4.08E-05 | 0.000262 | 0.000125 | 8  |
| BP | GO:00425 | 4/88  | 41/18670  | 4.08E-05 | 0.000262 | 0.000125 | 4  |
| BP | GO:00468 | 7/88  | 198/18670 | 4.17E-05 | 0.000267 | 0.000127 | 7  |
| BP | GO:19016 | 8/88  | 271/18670 | 4.19E-05 | 0.000268 | 0.000128 | 8  |
| BP | GO:00326 | 5/88  | 82/18670  | 4.25E-05 | 0.00027  | 0.000129 | 5  |
| BP | GO:00346 | 5/88  | 82/18670  | 4.25E-05 | 0.00027  | 0.000129 | 5  |
| BP | GO:00711 | 5/88  | 82/18670  | 4.25E-05 | 0.00027  | 0.000129 | 5  |
| BP | GO:00300 | 9/88  | 353/18670 | 4.28E-05 | 0.000272 | 0.00013  | 9  |
| BP | GO:00328 | 8/88  | 272/18670 | 4.30E-05 | 0.000272 | 0.00013  | 8  |
| BP | GO:00170 | 7/88  | 199/18670 | 4.31E-05 | 0.000272 | 0.00013  | 7  |
| BP | GO:00307 | 3/88  | 15/18670  | 4.42E-05 | 0.000277 | 0.000132 | 3  |
| BP | GO:00323 | 3/88  | 15/18670  | 4.42E-05 | 0.000277 | 0.000132 | 3  |
| BP | GO:00450 | 3/88  | 15/18670  | 4.42E-05 | 0.000277 | 0.000132 | 3  |
| BP | GO:00517 | 3/88  | 15/18670  | 4.42E-05 | 0.000277 | 0.000132 | 3  |
| BP | GO:00464 | 6/88  | 137/18670 | 4.63E-05 | 0.00029  | 0.000138 | 6  |
| BP | GO:00149 | 5/88  | 84/18670  | 4.78E-05 | 0.000298 | 0.000142 | 5  |
| BP | GO:00977 | 5/88  | 84/18670  | 4.78E-05 | 0.000298 | 0.000142 | 5  |
| BP | GO:00067 | 4/88  | 43/18670  | 4.94E-05 | 0.000307 | 0.000146 | 4  |
| BP | GO:00328 | 4/88  | 43/18670  | 4.94E-05 | 0.000307 | 0.000146 | 4  |
| BP | GO:19046 | 4/88  | 43/18670  | 4.94E-05 | 0.000307 | 0.000146 | 4  |
| BP | GO:00018 | 8/88  | 278/18670 | 5.02E-05 | 0.000311 | 0.000148 | 8  |
| BP | GO:00067 | 6/88  | 139/18670 | 5.02E-05 | 0.000311 | 0.000148 | 6  |
| BP | GO:00025 | 7/88  | 204/18670 | 5.04E-05 | 0.000311 | 0.000148 | 7  |
| BP | GO:00347 | 7/88  | 204/18670 | 5.04E-05 | 0.000311 | 0.000148 | 7  |
| BP | GO:00458 | 9/88  | 363/18670 | 5.32E-05 | 0.000326 | 0.000155 | 9  |
| BP | GO:00017 | 5/88  | 86/18670  | 5.35E-05 | 0.000326 | 0.000155 | 5  |
| BP | GO:00069 | 5/88  | 86/18670  | 5.35E-05 | 0.000326 | 0.000155 | 5  |
| BP | GO:00346 | 5/88  | 86/18670  | 5.35E-05 | 0.000326 | 0.000155 | 5  |
| BP | GO:00466 | 4/88  | 44/18670  | 5.42E-05 | 0.000326 | 0.000155 | 4  |
| BP | GO:00702 | 4/88  | 44/18670  | 5.42E-05 | 0.000326 | 0.000155 | 4  |
| BP | GO:00020 | 3/88  | 16/18670  | 5.42E-05 | 0.000326 | 0.000155 | 3  |
| BP | GO:00108 | 3/88  | 16/18670  | 5.42E-05 | 0.000326 | 0.000155 | 3  |
| BP | GO:00420 | 3/88  | 16/18670  | 5.42E-05 | 0.000326 | 0.000155 | 3  |
| BP | GO:00459 | 3/88  | 16/18670  | 5.42E-05 | 0.000326 | 0.000155 | 3  |
| BP | GO:00507 | 3/88  | 16/18670  | 5.42E-05 | 0.000326 | 0.000155 | 3  |
| BP | GO:00609 | 3/88  | 16/18670  | 5.42E-05 | 0.000326 | 0.000155 | 3  |
| BP | GO:00702 | 3/88  | 16/18670  | 5.42E-05 | 0.000326 | 0.000155 | 3  |
| BP | GO:00713 | 3/88  | 16/18670  | 5.42E-05 | 0.000326 | 0.000155 | 3  |
| BP | GO:19004 | 3/88  | 16/18670  | 5.42E-05 | 0.000326 | 0.000155 | 3  |
| BP | GO:00705 | 7/88  | 207/18670 | 5.53E-05 | 0.000332 | 0.000158 | 7  |
| BP | GO:00106 | 6/88  | 142/18670 | 5.65E-05 | 0.000337 | 0.000161 | 6  |
| BP | GO:19005 | 6/88  | 142/18670 | 5.65E-05 | 0.000337 | 0.000161 | 6  |
| BP | GO:00026 | 5/88  | 87/18670  | 5.66E-05 | 0.000337 | 0.000161 | 5  |
| BP | GO:00140 | 5/88  | 87/18670  | 5.66E-05 | 0.000337 | 0.000161 | 5  |
| BP | GO:00324 | 8/88  | 283/18670 | 5.69E-05 | 0.000338 | 0.000161 | 8  |
| BP | GO:00902 | 7/88  | 208/18670 | 5.70E-05 | 0.000338 | 0.000161 | 7  |
| BP | GO:00217 | 8/88  | 284/18670 | 5.83E-05 | 0.000345 | 0.000165 | 8  |
| BP | GO:00060 | 7/88  | 209/18670 | 5.87E-05 | 0.000347 | 0.000165 | 7  |
| BP | GO:00517 | 7/88  | 209/18670 | 5.87E-05 | 0.000347 | 0.000165 | 7  |
| BP | GO:00066 | 6/88  | 143/18670 | 5.88E-05 | 0.000347 | 0.000165 | 6  |
| BP | GO:00508 | 5/88  | 88/18670  | 5.97E-05 | 0.000352 | 0.000168 | 5  |
| BP | GO:00069 | 9/88  | 369/18670 | 6.03E-05 | 0.000355 | 0.000169 | 9  |
| BP | GO:19040 | 6/88  | 144/18670 | 6.11E-05 | 0.000359 | 0.000171 | 6  |
| BP | GO:00442 | 8/88  | 286/18670 | 6.12E-05 | 0.000359 | 0.000171 | 8  |
| BP | GO:00230 | 10/88 | 462/18670 | 6.28E-05 | 0.000367 | 0.000175 | 10 |
| BP | GO:00463 | 10/88 | 462/18670 | 6.28E-05 | 0.000367 | 0.000175 | 10 |
| BP | GO:00464 | 5/88  | 89/18670  | 6.31E-05 | 0.000368 | 0.000175 | 5  |
| BP | GO:00160 | 10/88 | 463/18670 | 6.40E-05 | 0.000372 | 0.000178 | 10 |

|    |          |       |           |          |          |          |    |
|----|----------|-------|-----------|----------|----------|----------|----|
| BP | GO:00308 | 4/88  | 46/18670  | 6.46E-05 | 0.000374 | 0.000178 | 4  |
| BP | GO:19003 | 4/88  | 46/18670  | 6.46E-05 | 0.000374 | 0.000178 | 4  |
| BP | GO:19040 | 4/88  | 46/18670  | 6.46E-05 | 0.000374 | 0.000178 | 4  |
| BP | GO:00305 | 3/88  | 17/18670  | 6.56E-05 | 0.000377 | 0.00018  | 3  |
| BP | GO:00702 | 3/88  | 17/18670  | 6.56E-05 | 0.000377 | 0.00018  | 3  |
| BP | GO:20012 | 3/88  | 17/18670  | 6.56E-05 | 0.000377 | 0.00018  | 3  |
| BP | GO:00071 | 8/88  | 289/18670 | 6.59E-05 | 0.000377 | 0.00018  | 8  |
| BP | GO:00022 | 6/88  | 146/18670 | 6.60E-05 | 0.000377 | 0.00018  | 6  |
| BP | GO:00061 | 6/88  | 146/18670 | 6.60E-05 | 0.000377 | 0.00018  | 6  |
| BP | GO:00352 | 6/88  | 146/18670 | 6.60E-05 | 0.000377 | 0.00018  | 6  |
| BP | GO:19048 | 6/88  | 146/18670 | 6.60E-05 | 0.000377 | 0.00018  | 6  |
| BP | GO:00022 | 6/88  | 147/18670 | 6.85E-05 | 0.000391 | 0.000186 | 6  |
| BP | GO:00108 | 7/88  | 215/18670 | 7.02E-05 | 0.0004   | 0.000191 | 7  |
| BP | GO:00488 | 4/88  | 47/18670  | 7.04E-05 | 0.0004   | 0.000191 | 4  |
| BP | GO:00702 | 4/88  | 47/18670  | 7.04E-05 | 0.0004   | 0.000191 | 4  |
| BP | GO:00059 | 8/88  | 292/18670 | 7.08E-05 | 0.000401 | 0.000191 | 8  |
| BP | GO:00515 | 6/88  | 148/18670 | 7.12E-05 | 0.000403 | 0.000192 | 6  |
| BP | GO:00720 | 8/88  | 293/18670 | 7.25E-05 | 0.00041  | 0.000195 | 8  |
| BP | GO:19048 | 5/88  | 92/18670  | 7.39E-05 | 0.000417 | 0.000199 | 5  |
| BP | GO:00162 | 8/88  | 295/18670 | 7.60E-05 | 0.000428 | 0.000204 | 8  |
| BP | GO:00519 | 4/88  | 48/18670  | 7.65E-05 | 0.00043  | 0.000205 | 4  |
| BP | GO:00083 | 6/88  | 150/18670 | 7.67E-05 | 0.00043  | 0.000205 | 6  |
| BP | GO:00421 | 9/88  | 381/18670 | 7.71E-05 | 0.000432 | 0.000206 | 9  |
| BP | GO:00108 | 3/88  | 18/18670  | 7.84E-05 | 0.000438 | 0.000209 | 3  |
| BP | GO:00607 | 3/88  | 18/18670  | 7.84E-05 | 0.000438 | 0.000209 | 3  |
| BP | GO:00613 | 3/88  | 18/18670  | 7.84E-05 | 0.000438 | 0.000209 | 3  |
| BP | GO:00487 | 7/88  | 219/18670 | 7.88E-05 | 0.000439 | 0.000209 | 7  |
| BP | GO:00026 | 4/88  | 49/18670  | 8.30E-05 | 0.00046  | 0.000219 | 4  |
| BP | GO:00308 | 4/88  | 49/18670  | 8.30E-05 | 0.00046  | 0.000219 | 4  |
| BP | GO:00327 | 4/88  | 49/18670  | 8.30E-05 | 0.00046  | 0.000219 | 4  |
| BP | GO:00061 | 8/88  | 300/18670 | 8.55E-05 | 0.000473 | 0.000225 | 8  |
| BP | GO:00903 | 6/88  | 153/18670 | 8.56E-05 | 0.000473 | 0.000225 | 6  |
| BP | GO:00421 | 5/88  | 95/18670  | 8.61E-05 | 0.000473 | 0.000225 | 5  |
| BP | GO:00421 | 5/88  | 95/18670  | 8.61E-05 | 0.000473 | 0.000225 | 5  |
| BP | GO:00508 | 5/88  | 95/18670  | 8.61E-05 | 0.000473 | 0.000225 | 5  |
| BP | GO:19030 | 5/88  | 95/18670  | 8.61E-05 | 0.000473 | 0.000225 | 5  |
| BP | GO:00454 | 7/88  | 223/18670 | 8.82E-05 | 0.000484 | 0.000231 | 7  |
| BP | GO:00029 | 4/88  | 50/18670  | 8.99E-05 | 0.000492 | 0.000235 | 4  |
| BP | GO:00708 | 10/88 | 483/18670 | 9.08E-05 | 0.000496 | 0.000237 | 10 |
| BP | GO:00105 | 3/88  | 19/18670  | 9.28E-05 | 0.000501 | 0.000239 | 3  |
| BP | GO:00108 | 3/88  | 19/18670  | 9.28E-05 | 0.000501 | 0.000239 | 3  |
| BP | GO:00331 | 3/88  | 19/18670  | 9.28E-05 | 0.000501 | 0.000239 | 3  |
| BP | GO:00515 | 3/88  | 19/18670  | 9.28E-05 | 0.000501 | 0.000239 | 3  |
| BP | GO:00601 | 3/88  | 19/18670  | 9.28E-05 | 0.000501 | 0.000239 | 3  |
| BP | GO:00609 | 3/88  | 19/18670  | 9.28E-05 | 0.000501 | 0.000239 | 3  |
| BP | GO:19021 | 3/88  | 19/18670  | 9.28E-05 | 0.000501 | 0.000239 | 3  |
| BP | GO:19037 | 3/88  | 19/18670  | 9.28E-05 | 0.000501 | 0.000239 | 3  |
| BP | GO:00432 | 5/88  | 97/18670  | 9.51E-05 | 0.000511 | 0.000244 | 5  |
| BP | GO:00447 | 5/88  | 97/18670  | 9.51E-05 | 0.000511 | 0.000244 | 5  |
| BP | GO:00308 | 6/88  | 156/18670 | 9.52E-05 | 0.000511 | 0.000244 | 6  |
| BP | GO:00347 | 6/88  | 156/18670 | 9.52E-05 | 0.000511 | 0.000244 | 6  |
| BP | GO:00193 | 4/88  | 51/18670  | 9.72E-05 | 0.000521 | 0.000248 | 4  |
| BP | GO:00315 | 6/88  | 157/18670 | 9.86E-05 | 0.000528 | 0.000252 | 6  |
| BP | GO:00507 | 5/88  | 98/18670  | 9.98E-05 | 0.000533 | 0.000254 | 5  |
| BP | GO:00725 | 10/88 | 489/18670 | 0.000101 | 0.000536 | 0.000256 | 10 |
| BP | GO:00510 | 7/88  | 228/18670 | 0.000101 | 0.00054  | 0.000257 | 7  |
| BP | GO:00421 | 8/88  | 310/18670 | 0.000107 | 0.00057  | 0.000272 | 8  |
| BP | GO:00425 | 3/88  | 20/18670  | 0.000109 | 0.000576 | 0.000275 | 3  |

|    |               |           |          |          |          |   |
|----|---------------|-----------|----------|----------|----------|---|
| BP | GO:00517 3/88 | 20/18670  | 0.000109 | 0.000576 | 0.000275 | 3 |
| BP | GO:00517 3/88 | 20/18670  | 0.000109 | 0.000576 | 0.000275 | 3 |
| BP | GO:19035 9/88 | 399/18670 | 0.000109 | 0.000579 | 0.000276 | 9 |
| BP | GO:00458 4/88 | 53/18670  | 0.000113 | 0.000597 | 0.000285 | 4 |
| BP | GO:00725 8/88 | 313/18670 | 0.000115 | 0.000604 | 0.000288 | 8 |
| BP | GO:00310 8/88 | 315/18670 | 0.00012  | 0.00063  | 0.0003   | 8 |
| BP | GO:00105 5/88 | 102/18670 | 0.000121 | 0.000633 | 0.000302 | 5 |
| BP | GO:00312 6/88 | 163/18670 | 0.000121 | 0.000635 | 0.000303 | 6 |
| BP | GO:00511 6/88 | 163/18670 | 0.000121 | 0.000635 | 0.000303 | 6 |
| BP | GO:00105 4/88 | 54/18670  | 0.000122 | 0.000636 | 0.000303 | 4 |
| BP | GO:00513 4/88 | 54/18670  | 0.000122 | 0.000636 | 0.000303 | 4 |
| BP | GO:00439 9/88 | 405/18670 | 0.000123 | 0.000639 | 0.000305 | 9 |
| BP | GO:00703 8/88 | 317/18670 | 0.000125 | 0.000651 | 0.000311 | 8 |
| BP | GO:00307 3/88 | 21/18670  | 0.000127 | 0.000655 | 0.000312 | 3 |
| BP | GO:00364 3/88 | 21/18670  | 0.000127 | 0.000655 | 0.000312 | 3 |
| BP | GO:00468 3/88 | 21/18670  | 0.000127 | 0.000655 | 0.000312 | 3 |
| BP | GO:00709 3/88 | 21/18670  | 0.000127 | 0.000655 | 0.000312 | 3 |
| BP | GO:00506 6/88 | 165/18670 | 0.00013  | 0.000669 | 0.000319 | 6 |
| BP | GO:00716 6/88 | 165/18670 | 0.00013  | 0.000669 | 0.000319 | 6 |
| BP | GO:00015 5/88 | 104/18670 | 0.000132 | 0.00068  | 0.000324 | 5 |
| BP | GO:00305 5/88 | 104/18670 | 0.000132 | 0.00068  | 0.000324 | 5 |
| BP | GO:00161 6/88 | 166/18670 | 0.000134 | 0.000688 | 0.000328 | 6 |
| BP | GO:00075 9/88 | 410/18670 | 0.000134 | 0.000689 | 0.000329 | 9 |
| BP | GO:00313 7/88 | 239/18670 | 0.000136 | 0.000695 | 0.000332 | 7 |
| BP | GO:00312 4/88 | 56/18670  | 0.00014  | 0.000718 | 0.000342 | 4 |
| BP | GO:00508 6/88 | 168/18670 | 0.000143 | 0.00073  | 0.000348 | 6 |
| BP | GO:00312 3/88 | 22/18670  | 0.000146 | 0.00074  | 0.000353 | 3 |
| BP | GO:00358 3/88 | 22/18670  | 0.000146 | 0.00074  | 0.000353 | 3 |
| BP | GO:00423 3/88 | 22/18670  | 0.000146 | 0.00074  | 0.000353 | 3 |
| BP | GO:00434 3/88 | 22/18670  | 0.000146 | 0.00074  | 0.000353 | 3 |
| BP | GO:19015 3/88 | 22/18670  | 0.000146 | 0.00074  | 0.000353 | 3 |
| BP | GO:00020 4/88 | 57/18670  | 0.00015  | 0.000758 | 0.000362 | 4 |
| BP | GO:00312 4/88 | 57/18670  | 0.00015  | 0.000758 | 0.000362 | 4 |
| BP | GO:00459 4/88 | 57/18670  | 0.00015  | 0.000758 | 0.000362 | 4 |
| BP | GO:19005 4/88 | 57/18670  | 0.00015  | 0.000758 | 0.000362 | 4 |
| BP | GO:00303 5/88 | 107/18670 | 0.000151 | 0.00076  | 0.000362 | 5 |
| BP | GO:00620 5/88 | 107/18670 | 0.000151 | 0.00076  | 0.000362 | 5 |
| BP | GO:00511 8/88 | 326/18670 | 0.000152 | 0.000761 | 0.000363 | 8 |
| BP | GO:00711 5/88 | 108/18670 | 0.000158 | 0.00079  | 0.000377 | 5 |
| BP | GO:20002 5/88 | 108/18670 | 0.000158 | 0.00079  | 0.000377 | 5 |
| BP | GO:00619 4/88 | 58/18670  | 0.000161 | 0.000804 | 0.000384 | 4 |
| BP | GO:00215 6/88 | 172/18670 | 0.000163 | 0.000811 | 0.000387 | 6 |
| BP | GO:00346 3/88 | 23/18670  | 0.000167 | 0.000834 | 0.000398 | 3 |
| BP | GO:00016 6/88 | 173/18670 | 0.000168 | 0.000834 | 0.000398 | 6 |
| BP | GO:00104 6/88 | 173/18670 | 0.000168 | 0.000834 | 0.000398 | 6 |
| BP | GO:00433 4/88 | 59/18670  | 0.000172 | 0.000853 | 0.000407 | 4 |
| BP | GO:00335 5/88 | 110/18670 | 0.000172 | 0.000853 | 0.000407 | 5 |
| BP | GO:00160 8/88 | 333/18670 | 0.000175 | 0.000866 | 0.000413 | 8 |
| BP | GO:00321 8/88 | 333/18670 | 0.000175 | 0.000866 | 0.000413 | 8 |
| BP | GO:00300 7/88 | 250/18670 | 0.000179 | 0.000884 | 0.000422 | 7 |
| BP | GO:00069 6/88 | 176/18670 | 0.000184 | 0.000906 | 0.000432 | 6 |
| BP | GO:00507 6/88 | 176/18670 | 0.000184 | 0.000906 | 0.000432 | 6 |
| BP | GO:00020 5/88 | 112/18670 | 0.000187 | 0.000917 | 0.000437 | 5 |
| BP | GO:00432 5/88 | 112/18670 | 0.000187 | 0.000917 | 0.000437 | 5 |
| BP | GO:19907 5/88 | 112/18670 | 0.000187 | 0.000917 | 0.000437 | 5 |
| BP | GO:00323 4/88 | 61/18670  | 0.000196 | 0.000956 | 0.000456 | 4 |
| BP | GO:00713 4/88 | 61/18670  | 0.000196 | 0.000956 | 0.000456 | 4 |
| BP | GO:19059 4/88 | 61/18670  | 0.000196 | 0.000956 | 0.000456 | 4 |

|    |               |           |          |          |          |   |
|----|---------------|-----------|----------|----------|----------|---|
| BP | GO:00068 9/88 | 434/18670 | 0.000206 | 0.001002 | 0.000478 | 9 |
| BP | GO:00076 7/88 | 256/18670 | 0.000207 | 0.001008 | 0.000481 | 7 |
| BP | GO:00700 4/88 | 62/18670  | 0.000209 | 0.001014 | 0.000483 | 4 |
| BP | GO:19040 8/88 | 342/18670 | 0.00021  | 0.00102  | 0.000486 | 8 |
| BP | GO:19043 5/88 | 115/18670 | 0.000212 | 0.001026 | 0.000489 | 5 |
| BP | GO:00069 8/88 | 343/18670 | 0.000214 | 0.001035 | 0.000493 | 8 |
| BP | GO:00092 3/88 | 25/18670  | 0.000216 | 0.001035 | 0.000493 | 3 |
| BP | GO:00194 3/88 | 25/18670  | 0.000216 | 0.001035 | 0.000493 | 3 |
| BP | GO:00324 3/88 | 25/18670  | 0.000216 | 0.001035 | 0.000493 | 3 |
| BP | GO:00509 3/88 | 25/18670  | 0.000216 | 0.001035 | 0.000493 | 3 |
| BP | GO:00604 3/88 | 25/18670  | 0.000216 | 0.001035 | 0.000493 | 3 |
| BP | GO:00605 3/88 | 25/18670  | 0.000216 | 0.001035 | 0.000493 | 3 |
| BP | GO:20003 3/88 | 25/18670  | 0.000216 | 0.001035 | 0.000493 | 3 |
| BP | GO:00107 8/88 | 344/18670 | 0.000219 | 0.001046 | 0.000499 | 8 |
| BP | GO:00217 5/88 | 116/18670 | 0.000221 | 0.001053 | 0.000502 | 5 |
| BP | GO:00219 5/88 | 116/18670 | 0.000221 | 0.001053 | 0.000502 | 5 |
| BP | GO:00511 8/88 | 346/18670 | 0.000227 | 0.001084 | 0.000517 | 8 |
| BP | GO:00027 5/88 | 117/18670 | 0.00023  | 0.001093 | 0.000521 | 5 |
| BP | GO:00486 6/88 | 184/18670 | 0.000234 | 0.001114 | 0.000531 | 6 |
| BP | GO:00456 4/88 | 64/18670  | 0.000236 | 0.001118 | 0.000533 | 4 |
| BP | GO:20003 4/88 | 64/18670  | 0.000236 | 0.001118 | 0.000533 | 4 |
| BP | GO:19902 5/88 | 118/18670 | 0.000239 | 0.001131 | 0.000539 | 5 |
| BP | GO:19037 6/88 | 185/18670 | 0.000241 | 0.001141 | 0.000544 | 6 |
| BP | GO:00509 3/88 | 26/18670  | 0.000243 | 0.001148 | 0.000548 | 3 |
| BP | GO:00442 9/88 | 445/18670 | 0.000248 | 0.001167 | 0.000557 | 9 |
| BP | GO:00019 5/88 | 119/18670 | 0.000248 | 0.00117  | 0.000558 | 5 |
| BP | GO:00025 4/88 | 65/18670  | 0.000251 | 0.001176 | 0.000561 | 4 |
| BP | GO:00069 4/88 | 65/18670  | 0.000251 | 0.001176 | 0.000561 | 4 |
| BP | GO:00400 4/88 | 66/18670  | 0.000266 | 0.001243 | 0.000593 | 4 |
| BP | GO:00517 4/88 | 66/18670  | 0.000266 | 0.001243 | 0.000593 | 4 |
| BP | GO:00519 4/88 | 66/18670  | 0.000266 | 0.001243 | 0.000593 | 4 |
| BP | GO:00723 7/88 | 267/18670 | 0.000268 | 0.00125  | 0.000596 | 7 |
| BP | GO:00436 5/88 | 121/18670 | 0.000268 | 0.001252 | 0.000597 | 5 |
| BP | GO:00096 3/88 | 27/18670  | 0.000273 | 0.00126  | 0.000601 | 3 |
| BP | GO:00359 3/88 | 27/18670  | 0.000273 | 0.00126  | 0.000601 | 3 |
| BP | GO:00459 3/88 | 27/18670  | 0.000273 | 0.00126  | 0.000601 | 3 |
| BP | GO:00481 3/88 | 27/18670  | 0.000273 | 0.00126  | 0.000601 | 3 |
| BP | GO:00714 3/88 | 27/18670  | 0.000273 | 0.00126  | 0.000601 | 3 |
| BP | GO:00714 3/88 | 27/18670  | 0.000273 | 0.00126  | 0.000601 | 3 |
| BP | GO:20001 3/88 | 27/18670  | 0.000273 | 0.00126  | 0.000601 | 3 |
| BP | GO:00507 7/88 | 268/18670 | 0.000274 | 0.001264 | 0.000603 | 7 |
| BP | GO:00069 8/88 | 356/18670 | 0.000276 | 0.00127  | 0.000606 | 8 |
| BP | GO:00190 5/88 | 122/18670 | 0.000279 | 0.001284 | 0.000612 | 5 |
| BP | GO:00072 7/88 | 269/18670 | 0.00028  | 0.001288 | 0.000614 | 7 |
| BP | GO:00519 5/88 | 123/18670 | 0.00029  | 0.001328 | 0.000633 | 5 |
| BP | GO:00716 5/88 | 123/18670 | 0.00029  | 0.001328 | 0.000633 | 5 |
| BP | GO:00431 6/88 | 192/18670 | 0.000295 | 0.001349 | 0.000643 | 6 |
| BP | GO:00162 4/88 | 68/18670  | 0.000298 | 0.001356 | 0.000647 | 4 |
| BP | GO:00336 4/88 | 68/18670  | 0.000298 | 0.001356 | 0.000647 | 4 |
| BP | GO:00359 4/88 | 68/18670  | 0.000298 | 0.001356 | 0.000647 | 4 |
| BP | GO:00509 4/88 | 68/18670  | 0.000298 | 0.001356 | 0.000647 | 4 |
| BP | GO:00712 4/88 | 68/18670  | 0.000298 | 0.001356 | 0.000647 | 4 |
| BP | GO:19021 7/88 | 272/18670 | 0.0003   | 0.001361 | 0.000649 | 7 |
| BP | GO:00192 5/88 | 124/18670 | 0.000301 | 0.001364 | 0.000651 | 5 |
| BP | GO:00109 8/88 | 361/18670 | 0.000303 | 0.001371 | 0.000654 | 8 |
| BP | GO:00015 3/88 | 28/18670  | 0.000304 | 0.001372 | 0.000654 | 3 |
| BP | GO:00082 3/88 | 28/18670  | 0.000304 | 0.001372 | 0.000654 | 3 |
| BP | GO:00335 3/88 | 28/18670  | 0.000304 | 0.001372 | 0.000654 | 3 |

|    |          |      |           |          |          |          |   |
|----|----------|------|-----------|----------|----------|----------|---|
| BP | GO:00464 | 3/88 | 28/18670  | 0.000304 | 0.001372 | 0.000654 | 3 |
| BP | GO:00702 | 4/88 | 69/18670  | 0.000315 | 0.00142  | 0.000677 | 4 |
| BP | GO:00181 | 5/88 | 126/18670 | 0.000324 | 0.001456 | 0.000694 | 5 |
| BP | GO:00026 | 9/88 | 463/18670 | 0.000331 | 0.001487 | 0.000709 | 9 |
| BP | GO:00436 | 5/88 | 127/18670 | 0.000336 | 0.001506 | 0.000718 | 5 |
| BP | GO:00022 | 6/88 | 197/18670 | 0.000338 | 0.001508 | 0.000719 | 6 |
| BP | GO:00003 | 3/88 | 29/18670  | 0.000338 | 0.001508 | 0.000719 | 3 |
| BP | GO:00059 | 3/88 | 29/18670  | 0.000338 | 0.001508 | 0.000719 | 3 |
| BP | GO:00072 | 3/88 | 29/18670  | 0.000338 | 0.001508 | 0.000719 | 3 |
| BP | GO:00109 | 3/88 | 29/18670  | 0.000338 | 0.001508 | 0.000719 | 3 |
| BP | GO:00513 | 9/88 | 466/18670 | 0.000347 | 0.001545 | 0.000737 | 9 |
| BP | GO:00336 | 4/88 | 71/18670  | 0.000352 | 0.001562 | 0.000745 | 4 |
| BP | GO:00714 | 4/88 | 71/18670  | 0.000352 | 0.001562 | 0.000745 | 4 |
| BP | GO:00071 | 6/88 | 199/18670 | 0.000357 | 0.001578 | 0.000752 | 6 |
| BP | GO:00359 | 6/88 | 199/18670 | 0.000357 | 0.001578 | 0.000752 | 6 |
| BP | GO:00508 | 6/88 | 199/18670 | 0.000357 | 0.001578 | 0.000752 | 6 |
| BP | GO:00714 | 5/88 | 129/18670 | 0.000361 | 0.001594 | 0.00076  | 5 |
| BP | GO:00025 | 4/88 | 72/18670  | 0.000371 | 0.001638 | 0.000781 | 4 |
| BP | GO:00003 | 3/88 | 30/18670  | 0.000375 | 0.001641 | 0.000782 | 3 |
| BP | GO:00463 | 3/88 | 30/18670  | 0.000375 | 0.001641 | 0.000782 | 3 |
| BP | GO:00481 | 3/88 | 30/18670  | 0.000375 | 0.001641 | 0.000782 | 3 |
| BP | GO:00488 | 3/88 | 30/18670  | 0.000375 | 0.001641 | 0.000782 | 3 |
| BP | GO:00715 | 3/88 | 30/18670  | 0.000375 | 0.001641 | 0.000782 | 3 |
| BP | GO:00902 | 3/88 | 30/18670  | 0.000375 | 0.001641 | 0.000782 | 3 |
| BP | GO:00301 | 5/88 | 131/18670 | 0.000387 | 0.001689 | 0.000806 | 5 |
| BP | GO:00468 | 5/88 | 131/18670 | 0.000387 | 0.001689 | 0.000806 | 5 |
| BP | GO:00987 | 5/88 | 131/18670 | 0.000387 | 0.001689 | 0.000806 | 5 |
| BP | GO:00311 | 4/88 | 73/18670  | 0.000391 | 0.001705 | 0.000813 | 4 |
| BP | GO:00302 | 6/88 | 203/18670 | 0.000397 | 0.001725 | 0.000822 | 6 |
| BP | GO:00159 | 7/88 | 285/18670 | 0.000397 | 0.001725 | 0.000822 | 7 |
| BP | GO:00305 | 5/88 | 132/18670 | 0.000401 | 0.001737 | 0.000828 | 5 |
| BP | GO:00432 | 5/88 | 132/18670 | 0.000401 | 0.001737 | 0.000828 | 5 |
| BP | GO:00455 | 5/88 | 132/18670 | 0.000401 | 0.001737 | 0.000828 | 5 |
| BP | GO:00514 | 7/88 | 286/18670 | 0.000405 | 0.001752 | 0.000836 | 7 |
| BP | GO:00316 | 4/88 | 74/18670  | 0.000412 | 0.001775 | 0.000846 | 4 |
| BP | GO:00326 | 4/88 | 74/18670  | 0.000412 | 0.001775 | 0.000846 | 4 |
| BP | GO:00105 | 3/88 | 31/18670  | 0.000413 | 0.001775 | 0.000846 | 3 |
| BP | GO:00331 | 3/88 | 31/18670  | 0.000413 | 0.001775 | 0.000846 | 3 |
| BP | GO:00434 | 3/88 | 31/18670  | 0.000413 | 0.001775 | 0.000846 | 3 |
| BP | GO:00457 | 3/88 | 31/18670  | 0.000413 | 0.001775 | 0.000846 | 3 |
| BP | GO:00027 | 7/88 | 288/18670 | 0.000422 | 0.001811 | 0.000864 | 7 |
| BP | GO:00067 | 5/88 | 134/18670 | 0.00043  | 0.001829 | 0.000872 | 5 |
| BP | GO:00182 | 5/88 | 134/18670 | 0.00043  | 0.001829 | 0.000872 | 5 |
| BP | GO:00302 | 5/88 | 134/18670 | 0.00043  | 0.001829 | 0.000872 | 5 |
| BP | GO:00444 | 5/88 | 134/18670 | 0.00043  | 0.001829 | 0.000872 | 5 |
| BP | GO:00518 | 5/88 | 134/18670 | 0.00043  | 0.001829 | 0.000872 | 5 |
| BP | GO:00518 | 5/88 | 134/18670 | 0.00043  | 0.001829 | 0.000872 | 5 |
| BP | GO:19032 | 4/88 | 75/18670  | 0.000434 | 0.001845 | 0.00088  | 4 |
| BP | GO:00300 | 6/88 | 207/18670 | 0.00044  | 0.001868 | 0.000891 | 6 |
| BP | GO:00347 | 9/88 | 483/18670 | 0.00045  | 0.00191  | 0.000911 | 9 |
| BP | GO:00082 | 3/88 | 32/18670  | 0.000455 | 0.001916 | 0.000914 | 3 |
| BP | GO:00381 | 3/88 | 32/18670  | 0.000455 | 0.001916 | 0.000914 | 3 |
| BP | GO:00423 | 3/88 | 32/18670  | 0.000455 | 0.001916 | 0.000914 | 3 |
| BP | GO:00466 | 3/88 | 32/18670  | 0.000455 | 0.001916 | 0.000914 | 3 |
| BP | GO:00519 | 3/88 | 32/18670  | 0.000455 | 0.001916 | 0.000914 | 3 |
| BP | GO:00226 | 9/88 | 484/18670 | 0.000457 | 0.001925 | 0.000918 | 9 |
| BP | GO:00072 | 5/88 | 136/18670 | 0.00046  | 0.001934 | 0.000922 | 5 |
| BP | GO:00511 | 7/88 | 293/18670 | 0.000468 | 0.001967 | 0.000938 | 7 |

|    |               |           |          |          |          |   |
|----|---------------|-----------|----------|----------|----------|---|
| BP | GO:19012 4/88 | 77/18670  | 0.00048  | 0.002012 | 0.00096  | 4 |
| BP | GO:00508 7/88 | 296/18670 | 0.000498 | 0.002076 | 0.00099  | 7 |
| BP | GO:00162 3/88 | 33/18670  | 0.000498 | 0.002076 | 0.00099  | 3 |
| BP | GO:00360 3/88 | 33/18670  | 0.000498 | 0.002076 | 0.00099  | 3 |
| BP | GO:00606 3/88 | 33/18670  | 0.000498 | 0.002076 | 0.00099  | 3 |
| BP | GO:19011 3/88 | 33/18670  | 0.000498 | 0.002076 | 0.00099  | 3 |
| BP | GO:20003 3/88 | 33/18670  | 0.000498 | 0.002076 | 0.00099  | 3 |
| BP | GO:00002 4/88 | 78/18670  | 0.000504 | 0.002094 | 0.000998 | 4 |
| BP | GO:00310 4/88 | 78/18670  | 0.000504 | 0.002094 | 0.000998 | 4 |
| BP | GO:00072 6/88 | 214/18670 | 0.000524 | 0.002171 | 0.001036 | 6 |
| BP | GO:00160 6/88 | 214/18670 | 0.000524 | 0.002171 | 0.001036 | 6 |
| BP | GO:00457 6/88 | 214/18670 | 0.000524 | 0.002171 | 0.001036 | 6 |
| BP | GO:00015 4/88 | 79/18670  | 0.000529 | 0.002184 | 0.001042 | 4 |
| BP | GO:00061 4/88 | 79/18670  | 0.000529 | 0.002184 | 0.001042 | 4 |
| BP | GO:00323 6/88 | 215/18670 | 0.000537 | 0.002218 | 0.001058 | 6 |
| BP | GO:00703 7/88 | 300/18670 | 0.000539 | 0.002221 | 0.001059 | 7 |
| BP | GO:00975 5/88 | 141/18670 | 0.000542 | 0.002232 | 0.001064 | 5 |
| BP | GO:00425 3/88 | 34/18670  | 0.000545 | 0.002237 | 0.001067 | 3 |
| BP | GO:00425 3/88 | 34/18670  | 0.000545 | 0.002237 | 0.001067 | 3 |
| BP | GO:00328 6/88 | 216/18670 | 0.000551 | 0.002259 | 0.001077 | 6 |
| BP | GO:00226 4/88 | 80/18670  | 0.000555 | 0.002272 | 0.001084 | 4 |
| BP | GO:00197 6/88 | 218/18670 | 0.000578 | 0.002366 | 0.001128 | 6 |
| BP | GO:00308 4/88 | 81/18670  | 0.000581 | 0.002374 | 0.001132 | 4 |
| BP | GO:19029 4/88 | 81/18670  | 0.000581 | 0.002374 | 0.001132 | 4 |
| BP | GO:00302 3/88 | 35/18670  | 0.000594 | 0.00241  | 0.001149 | 3 |
| BP | GO:00327 3/88 | 35/18670  | 0.000594 | 0.00241  | 0.001149 | 3 |
| BP | GO:00708 3/88 | 35/18670  | 0.000594 | 0.00241  | 0.001149 | 3 |
| BP | GO:00713 3/88 | 35/18670  | 0.000594 | 0.00241  | 0.001149 | 3 |
| BP | GO:19040 3/88 | 35/18670  | 0.000594 | 0.00241  | 0.001149 | 3 |
| BP | GO:19021 5/88 | 144/18670 | 0.000597 | 0.002419 | 0.001154 | 5 |
| BP | GO:19059 4/88 | 82/18670  | 0.000609 | 0.002466 | 0.001176 | 4 |
| BP | GO:00000 5/88 | 145/18670 | 0.000616 | 0.002491 | 0.001188 | 5 |
| BP | GO:00439 6/88 | 222/18670 | 0.000636 | 0.00257  | 0.001225 | 6 |
| BP | GO:00712 4/88 | 83/18670  | 0.000638 | 0.002573 | 0.001227 | 4 |
| BP | GO:00425 3/88 | 36/18670  | 0.000646 | 0.002599 | 0.00124  | 3 |
| BP | GO:00457 3/88 | 36/18670  | 0.000646 | 0.002599 | 0.00124  | 3 |
| BP | GO:00193 5/88 | 147/18670 | 0.000655 | 0.002632 | 0.001255 | 5 |
| BP | GO:00193 5/88 | 147/18670 | 0.000655 | 0.002632 | 0.001255 | 5 |
| BP | GO:00105 4/88 | 84/18670  | 0.000667 | 0.002664 | 0.001271 | 4 |
| BP | GO:00431 4/88 | 84/18670  | 0.000667 | 0.002664 | 0.001271 | 4 |
| BP | GO:00454 4/88 | 84/18670  | 0.000667 | 0.002664 | 0.001271 | 4 |
| BP | GO:00468 4/88 | 84/18670  | 0.000667 | 0.002664 | 0.001271 | 4 |
| BP | GO:19058 4/88 | 84/18670  | 0.000667 | 0.002664 | 0.001271 | 4 |
| BP | GO:00605 8/88 | 408/18670 | 0.00068  | 0.002712 | 0.001293 | 8 |
| BP | GO:00016 6/88 | 225/18670 | 0.000682 | 0.002716 | 0.001295 | 6 |
| BP | GO:00331 6/88 | 225/18670 | 0.000682 | 0.002716 | 0.001295 | 6 |
| BP | GO:00510 5/88 | 149/18670 | 0.000697 | 0.002743 | 0.001308 | 5 |
| BP | GO:20010 5/88 | 149/18670 | 0.000697 | 0.002743 | 0.001308 | 5 |
| BP | GO:00140 4/88 | 85/18670  | 0.000698 | 0.002743 | 0.001308 | 4 |
| BP | GO:00343 4/88 | 85/18670  | 0.000698 | 0.002743 | 0.001308 | 4 |
| BP | GO:00069 3/88 | 37/18670  | 0.0007   | 0.002743 | 0.001308 | 3 |
| BP | GO:00140 3/88 | 37/18670  | 0.0007   | 0.002743 | 0.001308 | 3 |
| BP | GO:00149 3/88 | 37/18670  | 0.0007   | 0.002743 | 0.001308 | 3 |
| BP | GO:00302 3/88 | 37/18670  | 0.0007   | 0.002743 | 0.001308 | 3 |
| BP | GO:00332 3/88 | 37/18670  | 0.0007   | 0.002743 | 0.001308 | 3 |
| BP | GO:00380 3/88 | 37/18670  | 0.0007   | 0.002743 | 0.001308 | 3 |
| BP | GO:00423 3/88 | 37/18670  | 0.0007   | 0.002743 | 0.001308 | 3 |
| BP | GO:00460 3/88 | 37/18670  | 0.0007   | 0.002743 | 0.001308 | 3 |



|    |               |           |          |          |          |   |
|----|---------------|-----------|----------|----------|----------|---|
| BP | GO:00900 3/88 | 37/18670  | 0.0007   | 0.002743 | 0.001308 | 3 |
| BP | GO:20001 3/88 | 37/18670  | 0.0007   | 0.002743 | 0.001308 | 3 |
| BP | GO:00725 5/88 | 150/18670 | 0.000718 | 0.00281  | 0.00134  | 5 |
| BP | GO:00327 4/88 | 86/18670  | 0.000729 | 0.002847 | 0.001357 | 4 |
| BP | GO:00420 4/88 | 86/18670  | 0.000729 | 0.002847 | 0.001357 | 4 |
| BP | GO:00169 5/88 | 151/18670 | 0.00074  | 0.002886 | 0.001376 | 5 |
| BP | GO:00320 3/88 | 38/18670  | 0.000758 | 0.002939 | 0.001402 | 3 |
| BP | GO:00468 3/88 | 38/18670  | 0.000758 | 0.002939 | 0.001402 | 3 |
| BP | GO:00480 3/88 | 38/18670  | 0.000758 | 0.002939 | 0.001402 | 3 |
| BP | GO:19040 3/88 | 38/18670  | 0.000758 | 0.002939 | 0.001402 | 3 |
| BP | GO:19047 3/88 | 38/18670  | 0.000758 | 0.002939 | 0.001402 | 3 |
| BP | GO:00097 6/88 | 230/18670 | 0.000765 | 0.002965 | 0.001414 | 6 |
| BP | GO:00507 5/88 | 153/18670 | 0.000785 | 0.003038 | 0.001449 | 5 |
| BP | GO:00341 4/88 | 88/18670  | 0.000795 | 0.003059 | 0.001459 | 4 |
| BP | GO:00434 4/88 | 88/18670  | 0.000795 | 0.003059 | 0.001459 | 4 |
| BP | GO:00700 4/88 | 88/18670  | 0.000795 | 0.003059 | 0.001459 | 4 |
| BP | GO:19004 4/88 | 88/18670  | 0.000795 | 0.003059 | 0.001459 | 4 |
| BP | GO:19035 4/88 | 88/18670  | 0.000795 | 0.003059 | 0.001459 | 4 |
| BP | GO:00713 7/88 | 321/18670 | 0.000803 | 0.003088 | 0.001472 | 7 |
| BP | GO:00605 7/88 | 322/18670 | 0.000818 | 0.003131 | 0.001493 | 7 |
| BP | GO:00106 3/88 | 39/18670  | 0.000818 | 0.003131 | 0.001493 | 3 |
| BP | GO:00609 3/88 | 39/18670  | 0.000818 | 0.003131 | 0.001493 | 3 |
| BP | GO:19045 3/88 | 39/18670  | 0.000818 | 0.003131 | 0.001493 | 3 |
| BP | GO:00973 4/88 | 89/18670  | 0.000829 | 0.003171 | 0.001512 | 4 |
| BP | GO:00609 5/88 | 155/18670 | 0.000832 | 0.003179 | 0.001516 | 5 |
| BP | GO:00467 6/88 | 235/18670 | 0.000856 | 0.003265 | 0.001557 | 6 |
| BP | GO:00323 8/88 | 423/18670 | 0.000859 | 0.003275 | 0.001562 | 8 |
| BP | GO:00424 4/88 | 90/18670  | 0.000865 | 0.003289 | 0.001568 | 4 |
| BP | GO:00716 4/88 | 90/18670  | 0.000865 | 0.003289 | 0.001568 | 4 |
| BP | GO:00512 3/88 | 40/18670  | 0.000881 | 0.003345 | 0.001595 | 3 |
| BP | GO:00715 3/88 | 40/18670  | 0.000881 | 0.003345 | 0.001595 | 3 |
| BP | GO:00328 6/88 | 237/18670 | 0.000894 | 0.003386 | 0.001615 | 6 |
| BP | GO:00431 6/88 | 237/18670 | 0.000894 | 0.003386 | 0.001615 | 6 |
| BP | GO:00518 4/88 | 91/18670  | 0.000901 | 0.003405 | 0.001624 | 4 |
| BP | GO:19019 4/88 | 91/18670  | 0.000901 | 0.003405 | 0.001624 | 4 |
| BP | GO:00604 5/88 | 158/18670 | 0.000907 | 0.003424 | 0.001633 | 5 |
| BP | GO:00164 7/88 | 328/18670 | 0.000911 | 0.003434 | 0.001638 | 7 |
| BP | GO:00703 6/88 | 239/18670 | 0.000934 | 0.003517 | 0.001677 | 6 |
| BP | GO:00458 4/88 | 92/18670  | 0.000939 | 0.003528 | 0.001683 | 4 |
| BP | GO:20001 4/88 | 92/18670  | 0.000939 | 0.003528 | 0.001683 | 4 |
| BP | GO:00507 3/88 | 41/18670  | 0.000948 | 0.003543 | 0.001689 | 3 |
| BP | GO:00508 3/88 | 41/18670  | 0.000948 | 0.003543 | 0.001689 | 3 |
| BP | GO:01500 3/88 | 41/18670  | 0.000948 | 0.003543 | 0.001689 | 3 |
| BP | GO:19001 3/88 | 41/18670  | 0.000948 | 0.003543 | 0.001689 | 3 |
| BP | GO:19030 3/88 | 41/18670  | 0.000948 | 0.003543 | 0.001689 | 3 |
| BP | GO:00302 6/88 | 240/18670 | 0.000954 | 0.003559 | 0.001697 | 6 |
| BP | GO:00506 6/88 | 240/18670 | 0.000954 | 0.003559 | 0.001697 | 6 |
| BP | GO:00161 2/88 | 10/18670  | 0.000964 | 0.003564 | 0.001699 | 2 |
| BP | GO:00306 2/88 | 10/18670  | 0.000964 | 0.003564 | 0.001699 | 2 |
| BP | GO:00312 2/88 | 10/18670  | 0.000964 | 0.003564 | 0.001699 | 2 |
| BP | GO:00334 2/88 | 10/18670  | 0.000964 | 0.003564 | 0.001699 | 2 |
| BP | GO:00600 2/88 | 10/18670  | 0.000964 | 0.003564 | 0.001699 | 2 |
| BP | GO:00703 2/88 | 10/18670  | 0.000964 | 0.003564 | 0.001699 | 2 |
| BP | GO:00712 2/88 | 10/18670  | 0.000964 | 0.003564 | 0.001699 | 2 |
| BP | GO:19037 2/88 | 10/18670  | 0.000964 | 0.003564 | 0.001699 | 2 |
| BP | GO:19038 2/88 | 10/18670  | 0.000964 | 0.003564 | 0.001699 | 2 |
| BP | GO:00030 4/88 | 93/18670  | 0.000977 | 0.003604 | 0.001719 | 4 |
| BP | GO:19011 4/88 | 93/18670  | 0.000977 | 0.003604 | 0.001719 | 4 |

|    |          |      |           |          |          |          |   |
|----|----------|------|-----------|----------|----------|----------|---|
| BP | GO:00158 | 7/88 | 333/18670 | 0.000995 | 0.00366  | 0.001745 | 7 |
| BP | GO:00469 | 7/88 | 333/18670 | 0.000995 | 0.00366  | 0.001745 | 7 |
| BP | GO:00109 | 3/88 | 42/18670  | 0.001017 | 0.003735 | 0.001781 | 3 |
| BP | GO:00421 | 3/88 | 42/18670  | 0.001017 | 0.003735 | 0.001781 | 3 |
| BP | GO:00508 | 8/88 | 436/18670 | 0.001044 | 0.003828 | 0.001826 | 8 |
| BP | GO:00450 | 4/88 | 95/18670  | 0.001058 | 0.003873 | 0.001847 | 4 |
| BP | GO:00511 | 4/88 | 95/18670  | 0.001058 | 0.003873 | 0.001847 | 4 |
| BP | GO:00991 | 8/88 | 437/18670 | 0.001059 | 0.003873 | 0.001847 | 8 |
| BP | GO:00066 | 5/88 | 164/18670 | 0.001072 | 0.003914 | 0.001866 | 5 |
| BP | GO:00066 | 3/88 | 43/18670  | 0.00109  | 0.00396  | 0.001888 | 3 |
| BP | GO:00066 | 3/88 | 43/18670  | 0.00109  | 0.00396  | 0.001888 | 3 |
| BP | GO:00312 | 3/88 | 43/18670  | 0.00109  | 0.00396  | 0.001888 | 3 |
| BP | GO:00324 | 3/88 | 43/18670  | 0.00109  | 0.00396  | 0.001888 | 3 |
| BP | GO:00341 | 3/88 | 43/18670  | 0.00109  | 0.00396  | 0.001888 | 3 |
| BP | GO:00106 | 4/88 | 96/18670  | 0.0011   | 0.003986 | 0.001901 | 4 |
| BP | GO:00973 | 4/88 | 96/18670  | 0.0011   | 0.003986 | 0.001901 | 4 |
| BP | GO:20011 | 4/88 | 96/18670  | 0.0011   | 0.003986 | 0.001901 | 4 |
| BP | GO:00515 | 4/88 | 97/18670  | 0.001144 | 0.004125 | 0.001967 | 4 |
| BP | GO:19028 | 4/88 | 97/18670  | 0.001144 | 0.004125 | 0.001967 | 4 |
| BP | GO:19908 | 4/88 | 97/18670  | 0.001144 | 0.004125 | 0.001967 | 4 |
| BP | GO:19908 | 4/88 | 97/18670  | 0.001144 | 0.004125 | 0.001967 | 4 |
| BP | GO:00715 | 6/88 | 249/18670 | 0.001153 | 0.004156 | 0.001982 | 6 |
| BP | GO:00330 | 7/88 | 342/18670 | 0.001161 | 0.004167 | 0.001987 | 7 |
| BP | GO:00140 | 3/88 | 44/18670  | 0.001165 | 0.004167 | 0.001987 | 3 |
| BP | GO:00302 | 3/88 | 44/18670  | 0.001165 | 0.004167 | 0.001987 | 3 |
| BP | GO:00329 | 3/88 | 44/18670  | 0.001165 | 0.004167 | 0.001987 | 3 |
| BP | GO:00341 | 3/88 | 44/18670  | 0.001165 | 0.004167 | 0.001987 | 3 |
| BP | GO:00903 | 3/88 | 44/18670  | 0.001165 | 0.004167 | 0.001987 | 3 |
| BP | GO:00193 | 2/88 | 11/18670  | 0.001175 | 0.004167 | 0.001987 | 2 |
| BP | GO:00316 | 2/88 | 11/18670  | 0.001175 | 0.004167 | 0.001987 | 2 |
| BP | GO:00336 | 2/88 | 11/18670  | 0.001175 | 0.004167 | 0.001987 | 2 |
| BP | GO:00436 | 2/88 | 11/18670  | 0.001175 | 0.004167 | 0.001987 | 2 |
| BP | GO:00458 | 2/88 | 11/18670  | 0.001175 | 0.004167 | 0.001987 | 2 |
| BP | GO:00519 | 2/88 | 11/18670  | 0.001175 | 0.004167 | 0.001987 | 2 |
| BP | GO:00725 | 2/88 | 11/18670  | 0.001175 | 0.004167 | 0.001987 | 2 |
| BP | GO:00726 | 2/88 | 11/18670  | 0.001175 | 0.004167 | 0.001987 | 2 |
| BP | GO:19904 | 2/88 | 11/18670  | 0.001175 | 0.004167 | 0.001987 | 2 |
| BP | GO:20012 | 2/88 | 11/18670  | 0.001175 | 0.004167 | 0.001987 | 2 |
| BP | GO:00109 | 6/88 | 250/18670 | 0.001177 | 0.00417  | 0.001988 | 6 |
| BP | GO:00020 | 4/88 | 98/18670  | 0.001188 | 0.004203 | 0.002004 | 4 |
| BP | GO:00215 | 6/88 | 251/18670 | 0.001202 | 0.004243 | 0.002023 | 6 |
| BP | GO:00456 | 6/88 | 251/18670 | 0.001202 | 0.004243 | 0.002023 | 6 |
| BP | GO:00303 | 5/88 | 169/18670 | 0.001225 | 0.00432  | 0.00206  | 5 |
| BP | GO:00193 | 4/88 | 99/18670  | 0.001234 | 0.004343 | 0.002071 | 4 |
| BP | GO:19015 | 4/88 | 99/18670  | 0.001234 | 0.004343 | 0.002071 | 4 |
| BP | GO:00310 | 3/88 | 45/18670  | 0.001244 | 0.004359 | 0.002079 | 3 |
| BP | GO:00325 | 3/88 | 45/18670  | 0.001244 | 0.004359 | 0.002079 | 3 |
| BP | GO:00359 | 3/88 | 45/18670  | 0.001244 | 0.004359 | 0.002079 | 3 |
| BP | GO:00427 | 3/88 | 45/18670  | 0.001244 | 0.004359 | 0.002079 | 3 |
| BP | GO:00485 | 3/88 | 45/18670  | 0.001244 | 0.004359 | 0.002079 | 3 |
| BP | GO:00106 | 4/88 | 100/18670 | 0.00128  | 0.004481 | 0.002137 | 4 |
| BP | GO:00604 | 5/88 | 171/18670 | 0.00129  | 0.004511 | 0.002151 | 5 |
| BP | GO:00715 | 6/88 | 255/18670 | 0.001303 | 0.00455  | 0.00217  | 6 |
| BP | GO:00071 | 7/88 | 349/18670 | 0.001304 | 0.00455  | 0.00217  | 7 |
| BP | GO:00450 | 8/88 | 452/18670 | 0.001313 | 0.004578 | 0.002183 | 8 |
| BP | GO:00059 | 3/88 | 46/18670  | 0.001327 | 0.004589 | 0.002188 | 3 |
| BP | GO:00092 | 3/88 | 46/18670  | 0.001327 | 0.004589 | 0.002188 | 3 |
| BP | GO:00108 | 3/88 | 46/18670  | 0.001327 | 0.004589 | 0.002188 | 3 |

|    |          |      |           |          |          |          |   |
|----|----------|------|-----------|----------|----------|----------|---|
| BP | GO:00336 | 3/88 | 46/18670  | 0.001327 | 0.004589 | 0.002188 | 3 |
| BP | GO:00351 | 3/88 | 46/18670  | 0.001327 | 0.004589 | 0.002188 | 3 |
| BP | GO:00607 | 3/88 | 46/18670  | 0.001327 | 0.004589 | 0.002188 | 3 |
| BP | GO:19909 | 3/88 | 46/18670  | 0.001327 | 0.004589 | 0.002188 | 3 |
| BP | GO:00326 | 4/88 | 101/18670 | 0.001328 | 0.004589 | 0.002188 | 4 |
| BP | GO:00344 | 4/88 | 101/18670 | 0.001328 | 0.004589 | 0.002188 | 4 |
| BP | GO:00488 | 6/88 | 257/18670 | 0.001356 | 0.004679 | 0.002231 | 6 |
| BP | GO:00000 | 4/88 | 102/18670 | 0.001378 | 0.004745 | 0.002263 | 4 |
| BP | GO:00988 | 4/88 | 102/18670 | 0.001378 | 0.004745 | 0.002263 | 4 |
| BP | GO:00065 | 2/88 | 12/18670  | 0.001406 | 0.004791 | 0.002285 | 2 |
| BP | GO:00108 | 2/88 | 12/18670  | 0.001406 | 0.004791 | 0.002285 | 2 |
| BP | GO:00312 | 2/88 | 12/18670  | 0.001406 | 0.004791 | 0.002285 | 2 |
| BP | GO:00313 | 2/88 | 12/18670  | 0.001406 | 0.004791 | 0.002285 | 2 |
| BP | GO:00423 | 2/88 | 12/18670  | 0.001406 | 0.004791 | 0.002285 | 2 |
| BP | GO:00515 | 2/88 | 12/18670  | 0.001406 | 0.004791 | 0.002285 | 2 |
| BP | GO:00702 | 2/88 | 12/18670  | 0.001406 | 0.004791 | 0.002285 | 2 |
| BP | GO:00704 | 2/88 | 12/18670  | 0.001406 | 0.004791 | 0.002285 | 2 |
| BP | GO:00972 | 2/88 | 12/18670  | 0.001406 | 0.004791 | 0.002285 | 2 |
| BP | GO:19004 | 2/88 | 12/18670  | 0.001406 | 0.004791 | 0.002285 | 2 |
| BP | GO:19038 | 2/88 | 12/18670  | 0.001406 | 0.004791 | 0.002285 | 2 |
| BP | GO:00902 | 6/88 | 259/18670 | 0.00141  | 0.004799 | 0.002288 | 6 |
| BP | GO:00305 | 3/88 | 47/18670  | 0.001412 | 0.004799 | 0.002288 | 3 |
| BP | GO:00708 | 3/88 | 47/18670  | 0.001412 | 0.004799 | 0.002288 | 3 |
| BP | GO:00442 | 4/88 | 103/18670 | 0.001428 | 0.004847 | 0.002311 | 4 |
| BP | GO:00461 | 5/88 | 175/18670 | 0.001429 | 0.004847 | 0.002311 | 5 |
| BP | GO:00091 | 6/88 | 261/18670 | 0.001467 | 0.004969 | 0.00237  | 6 |
| BP | GO:00104 | 6/88 | 262/18670 | 0.001495 | 0.005056 | 0.002411 | 6 |
| BP | GO:00158 | 6/88 | 262/18670 | 0.001495 | 0.005056 | 0.002411 | 6 |
| BP | GO:00308 | 3/88 | 48/18670  | 0.001501 | 0.005067 | 0.002416 | 3 |
| BP | GO:00459 | 3/88 | 48/18670  | 0.001501 | 0.005067 | 0.002416 | 3 |
| BP | GO:00019 | 5/88 | 177/18670 | 0.001503 | 0.005067 | 0.002416 | 5 |
| BP | GO:00070 | 4/88 | 105/18670 | 0.001533 | 0.005164 | 0.002463 | 4 |
| BP | GO:00109 | 5/88 | 178/18670 | 0.001541 | 0.005179 | 0.00247  | 5 |
| BP | GO:20012 | 5/88 | 178/18670 | 0.001541 | 0.005179 | 0.00247  | 5 |
| BP | GO:00085 | 8/88 | 464/18670 | 0.00155  | 0.005205 | 0.002482 | 8 |
| BP | GO:00313 | 6/88 | 264/18670 | 0.001554 | 0.005215 | 0.002487 | 6 |
| BP | GO:00030 | 8/88 | 465/18670 | 0.001571 | 0.005266 | 0.002511 | 8 |
| BP | GO:19019 | 4/88 | 106/18670 | 0.001588 | 0.005312 | 0.002533 | 4 |
| BP | GO:19040 | 4/88 | 106/18670 | 0.001588 | 0.005312 | 0.002533 | 4 |
| BP | GO:00107 | 3/88 | 49/18670  | 0.001594 | 0.005313 | 0.002533 | 3 |
| BP | GO:00485 | 3/88 | 49/18670  | 0.001594 | 0.005313 | 0.002533 | 3 |
| BP | GO:19047 | 3/88 | 49/18670  | 0.001594 | 0.005313 | 0.002533 | 3 |
| BP | GO:19900 | 3/88 | 49/18670  | 0.001594 | 0.005313 | 0.002533 | 3 |
| BP | GO:00016 | 7/88 | 362/18670 | 0.001608 | 0.005353 | 0.002553 | 7 |
| BP | GO:00107 | 2/88 | 13/18670  | 0.001656 | 0.005464 | 0.002605 | 2 |
| BP | GO:00108 | 2/88 | 13/18670  | 0.001656 | 0.005464 | 0.002605 | 2 |
| BP | GO:00316 | 2/88 | 13/18670  | 0.001656 | 0.005464 | 0.002605 | 2 |
| BP | GO:00319 | 2/88 | 13/18670  | 0.001656 | 0.005464 | 0.002605 | 2 |
| BP | GO:00421 | 2/88 | 13/18670  | 0.001656 | 0.005464 | 0.002605 | 2 |
| BP | GO:00435 | 2/88 | 13/18670  | 0.001656 | 0.005464 | 0.002605 | 2 |
| BP | GO:00450 | 2/88 | 13/18670  | 0.001656 | 0.005464 | 0.002605 | 2 |
| BP | GO:00605 | 2/88 | 13/18670  | 0.001656 | 0.005464 | 0.002605 | 2 |
| BP | GO:00610 | 2/88 | 13/18670  | 0.001656 | 0.005464 | 0.002605 | 2 |
| BP | GO:19028 | 2/88 | 13/18670  | 0.001656 | 0.005464 | 0.002605 | 2 |
| BP | GO:00228 | 6/88 | 268/18670 | 0.001677 | 0.005527 | 0.002636 | 6 |
| BP | GO:00017 | 3/88 | 50/18670  | 0.00169  | 0.005559 | 0.002651 | 3 |
| BP | GO:19000 | 3/88 | 50/18670  | 0.00169  | 0.005559 | 0.002651 | 3 |
| BP | GO:00062 | 4/88 | 108/18670 | 0.001701 | 0.005583 | 0.002663 | 4 |

|    |               |           |          |          |          |   |
|----|---------------|-----------|----------|----------|----------|---|
| BP | GO:19046 4/88 | 108/1867C | 0.001701 | 0.005583 | 0.002663 | 4 |
| BP | GO:01500 7/88 | 366/1867C | 0.001711 | 0.005613 | 0.002677 | 7 |
| BP | GO:00380 5/88 | 183/1867C | 0.00174  | 0.005701 | 0.002719 | 5 |
| BP | GO:00451 6/88 | 270/1867C | 0.001742 | 0.005701 | 0.002719 | 6 |
| BP | GO:00016 4/88 | 109/1867C | 0.001759 | 0.005754 | 0.002744 | 4 |
| BP | GO:00507 8/88 | 474/1867C | 0.001772 | 0.00579  | 0.002761 | 8 |
| BP | GO:00310 3/88 | 51/18670  | 0.001789 | 0.005826 | 0.002778 | 3 |
| BP | GO:00311 3/88 | 51/18670  | 0.001789 | 0.005826 | 0.002778 | 3 |
| BP | GO:00709 3/88 | 51/18670  | 0.001789 | 0.005826 | 0.002778 | 3 |
| BP | GO:00973 3/88 | 51/18670  | 0.001789 | 0.005826 | 0.002778 | 3 |
| BP | GO:19037 8/88 | 475/1867C | 0.001795 | 0.00584  | 0.002785 | 8 |
| BP | GO:00069 4/88 | 110/1867C | 0.001819 | 0.005911 | 0.002819 | 4 |
| BP | GO:00463 5/88 | 185/1867C | 0.001825 | 0.005924 | 0.002825 | 5 |
| BP | GO:00488 7/88 | 371/1867C | 0.001848 | 0.005994 | 0.002858 | 7 |
| BP | GO:00726 4/88 | 111/1867C | 0.00188  | 0.006093 | 0.002906 | 4 |
| BP | GO:00327 3/88 | 52/18670  | 0.001893 | 0.006122 | 0.002919 | 3 |
| BP | GO:19900 3/88 | 52/18670  | 0.001893 | 0.006122 | 0.002919 | 3 |
| BP | GO:00160 6/88 | 275/1867C | 0.00191  | 0.006163 | 0.002939 | 6 |
| BP | GO:00463 6/88 | 275/1867C | 0.00191  | 0.006163 | 0.002939 | 6 |
| BP | GO:00302 2/88 | 14/18670  | 0.001927 | 0.006163 | 0.002939 | 2 |
| BP | GO:00323 2/88 | 14/18670  | 0.001927 | 0.006163 | 0.002939 | 2 |
| BP | GO:00358 2/88 | 14/18670  | 0.001927 | 0.006163 | 0.002939 | 2 |
| BP | GO:00362 2/88 | 14/18670  | 0.001927 | 0.006163 | 0.002939 | 2 |
| BP | GO:00425 2/88 | 14/18670  | 0.001927 | 0.006163 | 0.002939 | 2 |
| BP | GO:00433 2/88 | 14/18670  | 0.001927 | 0.006163 | 0.002939 | 2 |
| BP | GO:00456 2/88 | 14/18670  | 0.001927 | 0.006163 | 0.002939 | 2 |
| BP | GO:00515 2/88 | 14/18670  | 0.001927 | 0.006163 | 0.002939 | 2 |
| BP | GO:00517 2/88 | 14/18670  | 0.001927 | 0.006163 | 0.002939 | 2 |
| BP | GO:20012 2/88 | 14/18670  | 0.001927 | 0.006163 | 0.002939 | 2 |
| BP | GO:00086 4/88 | 112/1867C | 0.001943 | 0.006199 | 0.002956 | 4 |
| BP | GO:00324 4/88 | 112/1867C | 0.001943 | 0.006199 | 0.002956 | 4 |
| BP | GO:00518 4/88 | 112/1867C | 0.001943 | 0.006199 | 0.002956 | 4 |
| BP | GO:00316 3/88 | 53/18670  | 0.001999 | 0.006351 | 0.003029 | 3 |
| BP | GO:00329 3/88 | 53/18670  | 0.001999 | 0.006351 | 0.003029 | 3 |
| BP | GO:00456 3/88 | 53/18670  | 0.001999 | 0.006351 | 0.003029 | 3 |
| BP | GO:00702 3/88 | 53/18670  | 0.001999 | 0.006351 | 0.003029 | 3 |
| BP | GO:00193 5/88 | 189/1867C | 0.002004 | 0.006351 | 0.003029 | 5 |
| BP | GO:00464 5/88 | 189/1867C | 0.002004 | 0.006351 | 0.003029 | 5 |
| BP | GO:00466 4/88 | 113/1867C | 0.002007 | 0.006351 | 0.003029 | 4 |
| BP | GO:00486 4/88 | 113/1867C | 0.002007 | 0.006351 | 0.003029 | 4 |
| BP | GO:00609 4/88 | 113/1867C | 0.002007 | 0.006351 | 0.003029 | 4 |
| BP | GO:00607 5/88 | 190/1867C | 0.00205  | 0.006482 | 0.003091 | 5 |
| BP | GO:00059 4/88 | 114/1867C | 0.002073 | 0.006541 | 0.003119 | 4 |
| BP | GO:00157 4/88 | 114/1867C | 0.002073 | 0.006541 | 0.003119 | 4 |
| BP | GO:00091 6/88 | 280/1867C | 0.002091 | 0.006593 | 0.003144 | 6 |
| BP | GO:00066 3/88 | 54/18670  | 0.00211  | 0.006623 | 0.003158 | 3 |
| BP | GO:00301 3/88 | 54/18670  | 0.00211  | 0.006623 | 0.003158 | 3 |
| BP | GO:00326 3/88 | 54/18670  | 0.00211  | 0.006623 | 0.003158 | 3 |
| BP | GO:00433 3/88 | 54/18670  | 0.00211  | 0.006623 | 0.003158 | 3 |
| BP | GO:00509 3/88 | 54/18670  | 0.00211  | 0.006623 | 0.003158 | 3 |
| BP | GO:00060 4/88 | 115/1867C | 0.00214  | 0.006705 | 0.003197 | 4 |
| BP | GO:00326 4/88 | 115/1867C | 0.00214  | 0.006705 | 0.003197 | 4 |
| BP | GO:00309 7/88 | 381/1867C | 0.002147 | 0.006721 | 0.003205 | 7 |
| BP | GO:00067 4/88 | 116/1867C | 0.002208 | 0.006858 | 0.00327  | 4 |
| BP | GO:00342 4/88 | 116/1867C | 0.002208 | 0.006858 | 0.00327  | 4 |
| BP | GO:00308 2/88 | 15/18670  | 0.002216 | 0.006858 | 0.00327  | 2 |
| BP | GO:00356 2/88 | 15/18670  | 0.002216 | 0.006858 | 0.00327  | 2 |
| BP | GO:00423 2/88 | 15/18670  | 0.002216 | 0.006858 | 0.00327  | 2 |

|    |          |      |           |          |          |          |   |
|----|----------|------|-----------|----------|----------|----------|---|
| BP | GO:00458 | 2/88 | 15/18670  | 0.002216 | 0.006858 | 0.00327  | 2 |
| BP | GO:00463 | 2/88 | 15/18670  | 0.002216 | 0.006858 | 0.00327  | 2 |
| BP | GO:00480 | 2/88 | 15/18670  | 0.002216 | 0.006858 | 0.00327  | 2 |
| BP | GO:00510 | 2/88 | 15/18670  | 0.002216 | 0.006858 | 0.00327  | 2 |
| BP | GO:00511 | 2/88 | 15/18670  | 0.002216 | 0.006858 | 0.00327  | 2 |
| BP | GO:19001 | 2/88 | 15/18670  | 0.002216 | 0.006858 | 0.00327  | 2 |
| BP | GO:20004 | 2/88 | 15/18670  | 0.002216 | 0.006858 | 0.00327  | 2 |
| BP | GO:20010 | 2/88 | 15/18670  | 0.002216 | 0.006858 | 0.00327  | 2 |
| BP | GO:00108 | 3/88 | 55/18670  | 0.002224 | 0.006864 | 0.003273 | 3 |
| BP | GO:00423 | 3/88 | 55/18670  | 0.002224 | 0.006864 | 0.003273 | 3 |
| BP | GO:00464 | 3/88 | 55/18670  | 0.002224 | 0.006864 | 0.003273 | 3 |
| BP | GO:00316 | 6/88 | 284/18670 | 0.002245 | 0.006922 | 0.003301 | 6 |
| BP | GO:00426 | 7/88 | 385/18670 | 0.002276 | 0.007001 | 0.003339 | 7 |
| BP | GO:00601 | 4/88 | 117/18670 | 0.002278 | 0.007001 | 0.003339 | 4 |
| BP | GO:00609 | 4/88 | 117/18670 | 0.002278 | 0.007001 | 0.003339 | 4 |
| BP | GO:19012 | 4/88 | 117/18670 | 0.002278 | 0.007001 | 0.003339 | 4 |
| BP | GO:00725 | 5/88 | 195/18670 | 0.002295 | 0.007047 | 0.003361 | 5 |
| BP | GO:00326 | 3/88 | 56/18670  | 0.002342 | 0.007171 | 0.00342  | 3 |
| BP | GO:19030 | 3/88 | 56/18670  | 0.002342 | 0.007171 | 0.00342  | 3 |
| BP | GO:19032 | 3/88 | 56/18670  | 0.002342 | 0.007171 | 0.00342  | 3 |
| BP | GO:00718 | 5/88 | 196/18670 | 0.002347 | 0.00718  | 0.003424 | 5 |
| BP | GO:00071 | 4/88 | 119/18670 | 0.002423 | 0.007394 | 0.003526 | 4 |
| BP | GO:00428 | 4/88 | 119/18670 | 0.002423 | 0.007394 | 0.003526 | 4 |
| BP | GO:00511 | 4/88 | 119/18670 | 0.002423 | 0.007394 | 0.003526 | 4 |
| BP | GO:00147 | 7/88 | 390/18670 | 0.002447 | 0.00746  | 0.003557 | 7 |
| BP | GO:00427 | 3/88 | 57/18670  | 0.002464 | 0.007498 | 0.003576 | 3 |
| BP | GO:19004 | 3/88 | 57/18670  | 0.002464 | 0.007498 | 0.003576 | 3 |
| BP | GO:00161 | 2/88 | 16/18670  | 0.002525 | 0.007645 | 0.003646 | 2 |
| BP | GO:00193 | 2/88 | 16/18670  | 0.002525 | 0.007645 | 0.003646 | 2 |
| BP | GO:00424 | 2/88 | 16/18670  | 0.002525 | 0.007645 | 0.003646 | 2 |
| BP | GO:00432 | 2/88 | 16/18670  | 0.002525 | 0.007645 | 0.003646 | 2 |
| BP | GO:19020 | 2/88 | 16/18670  | 0.002525 | 0.007645 | 0.003646 | 2 |
| BP | GO:19020 | 2/88 | 16/18670  | 0.002525 | 0.007645 | 0.003646 | 2 |
| BP | GO:00108 | 4/88 | 121/18670 | 0.002574 | 0.007773 | 0.003707 | 4 |
| BP | GO:00309 | 4/88 | 121/18670 | 0.002574 | 0.007773 | 0.003707 | 4 |
| BP | GO:00467 | 4/88 | 121/18670 | 0.002574 | 0.007773 | 0.003707 | 4 |
| BP | GO:00902 | 6/88 | 292/18670 | 0.002578 | 0.007778 | 0.003709 | 6 |
| BP | GO:00305 | 3/88 | 58/18670  | 0.002589 | 0.007786 | 0.003713 | 3 |
| BP | GO:00713 | 3/88 | 58/18670  | 0.002589 | 0.007786 | 0.003713 | 3 |
| BP | GO:00989 | 3/88 | 58/18670  | 0.002589 | 0.007786 | 0.003713 | 3 |
| BP | GO:19045 | 3/88 | 58/18670  | 0.002589 | 0.007786 | 0.003713 | 3 |
| BP | GO:00092 | 6/88 | 293/18670 | 0.002622 | 0.007877 | 0.003756 | 6 |
| BP | GO:00197 | 4/88 | 122/18670 | 0.002652 | 0.007939 | 0.003786 | 4 |
| BP | GO:00341 | 4/88 | 122/18670 | 0.002652 | 0.007939 | 0.003786 | 4 |
| BP | GO:00435 | 4/88 | 122/18670 | 0.002652 | 0.007939 | 0.003786 | 4 |
| BP | GO:19035 | 4/88 | 122/18670 | 0.002652 | 0.007939 | 0.003786 | 4 |
| BP | GO:00097 | 5/88 | 202/18670 | 0.002674 | 0.007998 | 0.003814 | 5 |
| BP | GO:00516 | 7/88 | 397/18670 | 0.002702 | 0.008075 | 0.003851 | 7 |
| BP | GO:00507 | 6/88 | 295/18670 | 0.002712 | 0.008098 | 0.003862 | 6 |
| BP | GO:00311 | 3/88 | 59/18670  | 0.002719 | 0.008099 | 0.003862 | 3 |
| BP | GO:00327 | 3/88 | 59/18670  | 0.002719 | 0.008099 | 0.003862 | 3 |
| BP | GO:19028 | 3/88 | 59/18670  | 0.002719 | 0.008099 | 0.003862 | 3 |
| BP | GO:00313 | 5/88 | 204/18670 | 0.002789 | 0.008302 | 0.003959 | 5 |
| BP | GO:19035 | 6/88 | 297/18670 | 0.002804 | 0.008338 | 0.003976 | 6 |
| BP | GO:00140 | 4/88 | 124/18670 | 0.002812 | 0.008355 | 0.003985 | 4 |
| BP | GO:00027 | 6/88 | 298/18670 | 0.002851 | 0.00837  | 0.003991 | 6 |
| BP | GO:19028 | 3/88 | 60/18670  | 0.002852 | 0.00837  | 0.003991 | 3 |
| BP | GO:00060 | 2/88 | 17/18670  | 0.002853 | 0.00837  | 0.003991 | 2 |

|    |               |           |          |          |          |   |
|----|---------------|-----------|----------|----------|----------|---|
| BP | GO:00069 2/88 | 17/18670  | 0.002853 | 0.00837  | 0.003991 | 2 |
| BP | GO:00102 2/88 | 17/18670  | 0.002853 | 0.00837  | 0.003991 | 2 |
| BP | GO:00157 2/88 | 17/18670  | 0.002853 | 0.00837  | 0.003991 | 2 |
| BP | GO:00329 2/88 | 17/18670  | 0.002853 | 0.00837  | 0.003991 | 2 |
| BP | GO:00450 2/88 | 17/18670  | 0.002853 | 0.00837  | 0.003991 | 2 |
| BP | GO:00457 2/88 | 17/18670  | 0.002853 | 0.00837  | 0.003991 | 2 |
| BP | GO:00506 2/88 | 17/18670  | 0.002853 | 0.00837  | 0.003991 | 2 |
| BP | GO:00517 2/88 | 17/18670  | 0.002853 | 0.00837  | 0.003991 | 2 |
| BP | GO:00606 2/88 | 17/18670  | 0.002853 | 0.00837  | 0.003991 | 2 |
| BP | GO:00612 2/88 | 17/18670  | 0.002853 | 0.00837  | 0.003991 | 2 |
| BP | GO:00718 2/88 | 17/18670  | 0.002853 | 0.00837  | 0.003991 | 2 |
| BP | GO:20008 2/88 | 17/18670  | 0.002853 | 0.00837  | 0.003991 | 2 |
| BP | GO:00068 4/88 | 125/18670 | 0.002895 | 0.008486 | 0.004047 | 4 |
| BP | GO:00463 6/88 | 300/18670 | 0.002947 | 0.008631 | 0.004116 | 6 |
| BP | GO:00067 5/88 | 207/18670 | 0.00297  | 0.008684 | 0.004141 | 5 |
| BP | GO:00342 5/88 | 207/18670 | 0.00297  | 0.008684 | 0.004141 | 5 |
| BP | GO:00460 4/88 | 126/18670 | 0.002979 | 0.008704 | 0.004151 | 4 |
| BP | GO:00068 3/88 | 61/18670  | 0.00299  | 0.008713 | 0.004155 | 3 |
| BP | GO:00308 3/88 | 61/18670  | 0.00299  | 0.008713 | 0.004155 | 3 |
| BP | GO:00451 3/88 | 61/18670  | 0.00299  | 0.008713 | 0.004155 | 3 |
| BP | GO:00507 5/88 | 208/18670 | 0.003032 | 0.008829 | 0.00421  | 5 |
| BP | GO:00352 4/88 | 127/18670 | 0.003065 | 0.008918 | 0.004253 | 4 |
| BP | GO:00106 3/88 | 62/18670  | 0.003131 | 0.009079 | 0.00433  | 3 |
| BP | GO:00316 3/88 | 62/18670  | 0.003131 | 0.009079 | 0.00433  | 3 |
| BP | GO:00443 3/88 | 62/18670  | 0.003131 | 0.009079 | 0.00433  | 3 |
| BP | GO:00454 3/88 | 62/18670  | 0.003131 | 0.009079 | 0.00433  | 3 |
| BP | GO:00025 4/88 | 128/18670 | 0.003153 | 0.009127 | 0.004353 | 4 |
| BP | GO:00347 4/88 | 128/18670 | 0.003153 | 0.009127 | 0.004353 | 4 |
| BP | GO:00507 5/88 | 210/18670 | 0.003159 | 0.009138 | 0.004358 | 5 |
| BP | GO:00107 2/88 | 18/18670  | 0.0032   | 0.009172 | 0.004374 | 2 |
| BP | GO:00319 2/88 | 18/18670  | 0.0032   | 0.009172 | 0.004374 | 2 |
| BP | GO:00359 2/88 | 18/18670  | 0.0032   | 0.009172 | 0.004374 | 2 |
| BP | GO:00396 2/88 | 18/18670  | 0.0032   | 0.009172 | 0.004374 | 2 |
| BP | GO:00427 2/88 | 18/18670  | 0.0032   | 0.009172 | 0.004374 | 2 |
| BP | GO:00457 2/88 | 18/18670  | 0.0032   | 0.009172 | 0.004374 | 2 |
| BP | GO:00468 2/88 | 18/18670  | 0.0032   | 0.009172 | 0.004374 | 2 |
| BP | GO:00702 2/88 | 18/18670  | 0.0032   | 0.009172 | 0.004374 | 2 |
| BP | GO:00708 2/88 | 18/18670  | 0.0032   | 0.009172 | 0.004374 | 2 |
| BP | GO:00713 2/88 | 18/18670  | 0.0032   | 0.009172 | 0.004374 | 2 |
| BP | GO:00900 2/88 | 18/18670  | 0.0032   | 0.009172 | 0.004374 | 2 |
| BP | GO:19030 4/88 | 129/18670 | 0.003242 | 0.009286 | 0.004428 | 4 |
| BP | GO:19043 3/88 | 63/18670  | 0.003276 | 0.009369 | 0.004468 | 3 |
| BP | GO:20004 3/88 | 63/18670  | 0.003276 | 0.009369 | 0.004468 | 3 |
| BP | GO:20010 5/88 | 214/18670 | 0.003424 | 0.009773 | 0.004661 | 5 |
| BP | GO:19004 3/88 | 64/18670  | 0.003426 | 0.009773 | 0.004661 | 3 |
| BP | GO:19036 3/88 | 64/18670  | 0.003426 | 0.009773 | 0.004661 | 3 |
| BP | GO:00703 5/88 | 215/18670 | 0.003493 | 0.009956 | 0.004748 | 5 |
| BP | GO:19907 6/88 | 311/18670 | 0.003517 | 0.01001  | 0.004773 | 6 |
| BP | GO:00031 4/88 | 132/18670 | 0.00352  | 0.01001  | 0.004773 | 4 |
| BP | GO:00424 4/88 | 132/18670 | 0.00352  | 0.01001  | 0.004773 | 4 |
| BP | GO:00025 2/88 | 19/18670  | 0.003565 | 0.010047 | 0.004791 | 2 |
| BP | GO:00026 2/88 | 19/18670  | 0.003565 | 0.010047 | 0.004791 | 2 |
| BP | GO:00030 2/88 | 19/18670  | 0.003565 | 0.010047 | 0.004791 | 2 |
| BP | GO:00309 2/88 | 19/18670  | 0.003565 | 0.010047 | 0.004791 | 2 |
| BP | GO:00329 2/88 | 19/18670  | 0.003565 | 0.010047 | 0.004791 | 2 |
| BP | GO:00341 2/88 | 19/18670  | 0.003565 | 0.010047 | 0.004791 | 2 |
| BP | GO:00450 2/88 | 19/18670  | 0.003565 | 0.010047 | 0.004791 | 2 |
| BP | GO:00602 2/88 | 19/18670  | 0.003565 | 0.010047 | 0.004791 | 2 |

|    |               |           |          |          |          |   |
|----|---------------|-----------|----------|----------|----------|---|
| BP | GO:00607 2/88 | 19/18670  | 0.003565 | 0.010047 | 0.004791 | 2 |
| BP | GO:00902 2/88 | 19/18670  | 0.003565 | 0.010047 | 0.004791 | 2 |
| BP | GO:19026 2/88 | 19/18670  | 0.003565 | 0.010047 | 0.004791 | 2 |
| BP | GO:00327 3/88 | 65/18670  | 0.00358  | 0.010072 | 0.004803 | 3 |
| BP | GO:00726 3/88 | 65/18670  | 0.00358  | 0.010072 | 0.004803 | 3 |
| BP | GO:00442 5/88 | 217/18670 | 0.003633 | 0.010215 | 0.004871 | 5 |
| BP | GO:00435 7/88 | 419/18670 | 0.003638 | 0.010219 | 0.004873 | 7 |
| BP | GO:00430 6/88 | 314/18670 | 0.003686 | 0.010346 | 0.004934 | 6 |
| BP | GO:00061 4/88 | 134/18670 | 0.003715 | 0.010418 | 0.004968 | 4 |
| BP | GO:00519 6/88 | 315/18670 | 0.003743 | 0.01049  | 0.005003 | 6 |
| BP | GO:00068 6/88 | 316/18670 | 0.003802 | 0.010645 | 0.005077 | 6 |
| BP | GO:00018 4/88 | 135/18670 | 0.003815 | 0.010673 | 0.00509  | 4 |
| BP | GO:00469 4/88 | 136/18670 | 0.003916 | 0.010949 | 0.005221 | 4 |
| BP | GO:00028 2/88 | 20/18670  | 0.003949 | 0.010953 | 0.005224 | 2 |
| BP | GO:00065 2/88 | 20/18670  | 0.003949 | 0.010953 | 0.005224 | 2 |
| BP | GO:00100 2/88 | 20/18670  | 0.003949 | 0.010953 | 0.005224 | 2 |
| BP | GO:00161 2/88 | 20/18670  | 0.003949 | 0.010953 | 0.005224 | 2 |
| BP | GO:00193 2/88 | 20/18670  | 0.003949 | 0.010953 | 0.005224 | 2 |
| BP | GO:00302 2/88 | 20/18670  | 0.003949 | 0.010953 | 0.005224 | 2 |
| BP | GO:00343 2/88 | 20/18670  | 0.003949 | 0.010953 | 0.005224 | 2 |
| BP | GO:00602 2/88 | 20/18670  | 0.003949 | 0.010953 | 0.005224 | 2 |
| BP | GO:00977 2/88 | 20/18670  | 0.003949 | 0.010953 | 0.005224 | 2 |
| BP | GO:19029 2/88 | 20/18670  | 0.003949 | 0.010953 | 0.005224 | 2 |
| BP | GO:00022 6/88 | 319/18670 | 0.003981 | 0.011023 | 0.005257 | 6 |
| BP | GO:00072 6/88 | 319/18670 | 0.003981 | 0.011023 | 0.005257 | 6 |
| BP | GO:00508 3/88 | 68/18670  | 0.004066 | 0.01125  | 0.005365 | 3 |
| BP | GO:00091 4/88 | 138/18670 | 0.004125 | 0.011369 | 0.005422 | 4 |
| BP | GO:00091 4/88 | 138/18670 | 0.004125 | 0.011369 | 0.005422 | 4 |
| BP | GO:00093 4/88 | 138/18670 | 0.004125 | 0.011369 | 0.005422 | 4 |
| BP | GO:00466 4/88 | 138/18670 | 0.004125 | 0.011369 | 0.005422 | 4 |
| BP | GO:00610 4/88 | 138/18670 | 0.004125 | 0.011369 | 0.005422 | 4 |
| BP | GO:00507 4/88 | 139/18670 | 0.004232 | 0.011648 | 0.005555 | 4 |
| BP | GO:00080 3/88 | 69/18670  | 0.004236 | 0.011648 | 0.005555 | 3 |
| BP | GO:00159 3/88 | 69/18670  | 0.004236 | 0.011648 | 0.005555 | 3 |
| BP | GO:00018 4/88 | 140/18670 | 0.004341 | 0.011835 | 0.005644 | 4 |
| BP | GO:00091 4/88 | 140/18670 | 0.004341 | 0.011835 | 0.005644 | 4 |
| BP | GO:00346 4/88 | 140/18670 | 0.004341 | 0.011835 | 0.005644 | 4 |
| BP | GO:19033 4/88 | 140/18670 | 0.004341 | 0.011835 | 0.005644 | 4 |
| BP | GO:00108 2/88 | 21/18670  | 0.004352 | 0.011835 | 0.005644 | 2 |
| BP | GO:00170 2/88 | 21/18670  | 0.004352 | 0.011835 | 0.005644 | 2 |
| BP | GO:00351 2/88 | 21/18670  | 0.004352 | 0.011835 | 0.005644 | 2 |
| BP | GO:00363 2/88 | 21/18670  | 0.004352 | 0.011835 | 0.005644 | 2 |
| BP | GO:00467 2/88 | 21/18670  | 0.004352 | 0.011835 | 0.005644 | 2 |
| BP | GO:00514 2/88 | 21/18670  | 0.004352 | 0.011835 | 0.005644 | 2 |
| BP | GO:00519 2/88 | 21/18670  | 0.004352 | 0.011835 | 0.005644 | 2 |
| BP | GO:00705 2/88 | 21/18670  | 0.004352 | 0.011835 | 0.005644 | 2 |
| BP | GO:00714 2/88 | 21/18670  | 0.004352 | 0.011835 | 0.005644 | 2 |
| BP | GO:19048 2/88 | 21/18670  | 0.004352 | 0.011835 | 0.005644 | 2 |
| BP | GO:00330 3/88 | 70/18670  | 0.004411 | 0.011969 | 0.005708 | 3 |
| BP | GO:00519 3/88 | 70/18670  | 0.004411 | 0.011969 | 0.005708 | 3 |
| BP | GO:20012 3/88 | 70/18670  | 0.004411 | 0.011969 | 0.005708 | 3 |
| BP | GO:00082 4/88 | 141/18670 | 0.004452 | 0.012071 | 0.005757 | 4 |
| BP | GO:19044 3/88 | 71/18670  | 0.00459  | 0.012435 | 0.00593  | 3 |
| BP | GO:00310 4/88 | 143/18670 | 0.00468  | 0.012659 | 0.006037 | 4 |
| BP | GO:00443 4/88 | 143/18670 | 0.00468  | 0.012659 | 0.006037 | 4 |
| BP | GO:00427 6/88 | 330/18670 | 0.00469  | 0.012678 | 0.006046 | 6 |
| BP | GO:19033 5/88 | 231/18670 | 0.004732 | 0.012774 | 0.006092 | 5 |
| BP | GO:00324 2/88 | 22/18670  | 0.004772 | 0.012774 | 0.006092 | 2 |

|    |               |           |          |          |          |   |
|----|---------------|-----------|----------|----------|----------|---|
| BP | GO:00329 2/88 | 22/18670  | 0.004772 | 0.012774 | 0.006092 | 2 |
| BP | GO:00355 2/88 | 22/18670  | 0.004772 | 0.012774 | 0.006092 | 2 |
| BP | GO:00420 2/88 | 22/18670  | 0.004772 | 0.012774 | 0.006092 | 2 |
| BP | GO:00456 2/88 | 22/18670  | 0.004772 | 0.012774 | 0.006092 | 2 |
| BP | GO:00457 2/88 | 22/18670  | 0.004772 | 0.012774 | 0.006092 | 2 |
| BP | GO:00510 2/88 | 22/18670  | 0.004772 | 0.012774 | 0.006092 | 2 |
| BP | GO:00511 2/88 | 22/18670  | 0.004772 | 0.012774 | 0.006092 | 2 |
| BP | GO:00600 2/88 | 22/18670  | 0.004772 | 0.012774 | 0.006092 | 2 |
| BP | GO:00605 2/88 | 22/18670  | 0.004772 | 0.012774 | 0.006092 | 2 |
| BP | GO:00903 2/88 | 22/18670  | 0.004772 | 0.012774 | 0.006092 | 2 |
| BP | GO:00066 3/88 | 72/18670  | 0.004773 | 0.012774 | 0.006092 | 3 |
| BP | GO:00076 4/88 | 145/18670 | 0.004915 | 0.013133 | 0.006263 | 4 |
| BP | GO:00076 4/88 | 145/18670 | 0.004915 | 0.013133 | 0.006263 | 4 |
| BP | GO:00335 3/88 | 73/18670  | 0.004961 | 0.013236 | 0.006312 | 3 |
| BP | GO:00618 3/88 | 73/18670  | 0.004961 | 0.013236 | 0.006312 | 3 |
| BP | GO:00485 5/88 | 234/18670 | 0.004996 | 0.013318 | 0.006351 | 5 |
| BP | GO:00605 5/88 | 235/18670 | 0.005086 | 0.013547 | 0.00646  | 5 |
| BP | GO:00059 3/88 | 74/18670  | 0.005153 | 0.013676 | 0.006522 | 3 |
| BP | GO:00140 3/88 | 74/18670  | 0.005153 | 0.013676 | 0.006522 | 3 |
| BP | GO:00301 3/88 | 74/18670  | 0.005153 | 0.013676 | 0.006522 | 3 |
| BP | GO:00325 3/88 | 74/18670  | 0.005153 | 0.013676 | 0.006522 | 3 |
| BP | GO:00996 3/88 | 74/18670  | 0.005153 | 0.013676 | 0.006522 | 3 |
| BP | GO:00712 4/88 | 147/18670 | 0.005158 | 0.013678 | 0.006523 | 4 |
| BP | GO:00434 6/88 | 337/18670 | 0.005188 | 0.013724 | 0.006545 | 6 |
| BP | GO:00341 2/88 | 23/18670  | 0.005211 | 0.013724 | 0.006545 | 2 |
| BP | GO:00360 2/88 | 23/18670  | 0.005211 | 0.013724 | 0.006545 | 2 |
| BP | GO:00458 2/88 | 23/18670  | 0.005211 | 0.013724 | 0.006545 | 2 |
| BP | GO:00509 2/88 | 23/18670  | 0.005211 | 0.013724 | 0.006545 | 2 |
| BP | GO:00510 2/88 | 23/18670  | 0.005211 | 0.013724 | 0.006545 | 2 |
| BP | GO:00513 2/88 | 23/18670  | 0.005211 | 0.013724 | 0.006545 | 2 |
| BP | GO:00518 2/88 | 23/18670  | 0.005211 | 0.013724 | 0.006545 | 2 |
| BP | GO:20006 2/88 | 23/18670  | 0.005211 | 0.013724 | 0.006545 | 2 |
| BP | GO:00072 7/88 | 448/18670 | 0.005228 | 0.013758 | 0.006561 | 7 |
| BP | GO:00086 4/88 | 148/18670 | 0.005283 | 0.013893 | 0.006625 | 4 |
| BP | GO:00482 7/88 | 449/18670 | 0.00529  | 0.013903 | 0.00663  | 7 |
| BP | GO:00060 3/88 | 75/18670  | 0.00535  | 0.014028 | 0.00669  | 3 |
| BP | GO:00074 3/88 | 75/18670  | 0.00535  | 0.014028 | 0.00669  | 3 |
| BP | GO:00440 3/88 | 75/18670  | 0.00535  | 0.014028 | 0.00669  | 3 |
| BP | GO:00302 5/88 | 238/18670 | 0.005362 | 0.014039 | 0.006695 | 5 |
| BP | GO:00516 5/88 | 238/18670 | 0.005362 | 0.014039 | 0.006695 | 5 |
| BP | GO:19039 4/88 | 149/18670 | 0.005409 | 0.014151 | 0.006748 | 4 |
| BP | GO:00082 4/88 | 150/18670 | 0.005538 | 0.014455 | 0.006893 | 4 |
| BP | GO:00487 4/88 | 150/18670 | 0.005538 | 0.014455 | 0.006893 | 4 |
| BP | GO:00717 4/88 | 150/18670 | 0.005538 | 0.014455 | 0.006893 | 4 |
| BP | GO:00019 3/88 | 76/18670  | 0.005551 | 0.014458 | 0.006895 | 3 |
| BP | GO:00074 3/88 | 76/18670  | 0.005551 | 0.014458 | 0.006895 | 3 |
| BP | GO:00454 3/88 | 76/18670  | 0.005551 | 0.014458 | 0.006895 | 3 |
| BP | GO:00380 5/88 | 241/18670 | 0.00565  | 0.014651 | 0.006987 | 5 |
| BP | GO:00425 5/88 | 241/18670 | 0.00565  | 0.014651 | 0.006987 | 5 |
| BP | GO:00091 2/88 | 24/18670  | 0.005667 | 0.014651 | 0.006987 | 2 |
| BP | GO:00421 2/88 | 24/18670  | 0.005667 | 0.014651 | 0.006987 | 2 |
| BP | GO:00509 2/88 | 24/18670  | 0.005667 | 0.014651 | 0.006987 | 2 |
| BP | GO:00601 2/88 | 24/18670  | 0.005667 | 0.014651 | 0.006987 | 2 |
| BP | GO:00716 2/88 | 24/18670  | 0.005667 | 0.014651 | 0.006987 | 2 |
| BP | GO:00900 2/88 | 24/18670  | 0.005667 | 0.014651 | 0.006987 | 2 |
| BP | GO:20002 2/88 | 24/18670  | 0.005667 | 0.014651 | 0.006987 | 2 |
| BP | GO:20010 2/88 | 24/18670  | 0.005667 | 0.014651 | 0.006987 | 2 |
| BP | GO:00335 5/88 | 242/18670 | 0.005748 | 0.014849 | 0.007081 | 5 |



|    |               |           |          |          |          |   |
|----|---------------|-----------|----------|----------|----------|---|
| BP | GO:00001 4/88 | 152/18670 | 0.005801 | 0.014963 | 0.007136 | 4 |
| BP | GO:00162 4/88 | 152/18670 | 0.005801 | 0.014963 | 0.007136 | 4 |
| BP | GO:00060 4/88 | 154/18670 | 0.006072 | 0.015652 | 0.007464 | 4 |
| BP | GO:00094 2/88 | 25/18670  | 0.006141 | 0.015691 | 0.007483 | 2 |
| BP | GO:00190 2/88 | 25/18670  | 0.006141 | 0.015691 | 0.007483 | 2 |
| BP | GO:00308 2/88 | 25/18670  | 0.006141 | 0.015691 | 0.007483 | 2 |
| BP | GO:00316 2/88 | 25/18670  | 0.006141 | 0.015691 | 0.007483 | 2 |
| BP | GO:00456 2/88 | 25/18670  | 0.006141 | 0.015691 | 0.007483 | 2 |
| BP | GO:00456 2/88 | 25/18670  | 0.006141 | 0.015691 | 0.007483 | 2 |
| BP | GO:00511 2/88 | 25/18670  | 0.006141 | 0.015691 | 0.007483 | 2 |
| BP | GO:00603 2/88 | 25/18670  | 0.006141 | 0.015691 | 0.007483 | 2 |
| BP | GO:00603 2/88 | 25/18670  | 0.006141 | 0.015691 | 0.007483 | 2 |
| BP | GO:00900 2/88 | 25/18670  | 0.006141 | 0.015691 | 0.007483 | 2 |
| BP | GO:19001 2/88 | 25/18670  | 0.006141 | 0.015691 | 0.007483 | 2 |
| BP | GO:20006 2/88 | 25/18670  | 0.006141 | 0.015691 | 0.007483 | 2 |
| BP | GO:00550 3/88 | 79/18670  | 0.006182 | 0.015771 | 0.007521 | 3 |
| BP | GO:19000 3/88 | 79/18670  | 0.006182 | 0.015771 | 0.007521 | 3 |
| BP | GO:19018 4/88 | 155/18670 | 0.006211 | 0.015823 | 0.007546 | 4 |
| BP | GO:19026 4/88 | 155/18670 | 0.006211 | 0.015823 | 0.007546 | 4 |
| BP | GO:00486 4/88 | 156/18670 | 0.006352 | 0.01617  | 0.007711 | 4 |
| BP | GO:00464 5/88 | 248/18670 | 0.006363 | 0.016186 | 0.007719 | 5 |
| BP | GO:00140 3/88 | 81/18670  | 0.006625 | 0.016715 | 0.007971 | 3 |
| BP | GO:00305 3/88 | 81/18670  | 0.006625 | 0.016715 | 0.007971 | 3 |
| BP | GO:00324 3/88 | 81/18670  | 0.006625 | 0.016715 | 0.007971 | 3 |
| BP | GO:00023 2/88 | 26/18670  | 0.006633 | 0.016715 | 0.007971 | 2 |
| BP | GO:00063 2/88 | 26/18670  | 0.006633 | 0.016715 | 0.007971 | 2 |
| BP | GO:00220 2/88 | 26/18670  | 0.006633 | 0.016715 | 0.007971 | 2 |
| BP | GO:00322 2/88 | 26/18670  | 0.006633 | 0.016715 | 0.007971 | 2 |
| BP | GO:00435 2/88 | 26/18670  | 0.006633 | 0.016715 | 0.007971 | 2 |
| BP | GO:00605 2/88 | 26/18670  | 0.006633 | 0.016715 | 0.007971 | 2 |
| BP | GO:00607 2/88 | 26/18670  | 0.006633 | 0.016715 | 0.007971 | 2 |
| BP | GO:00607 2/88 | 26/18670  | 0.006633 | 0.016715 | 0.007971 | 2 |
| BP | GO:00716 2/88 | 26/18670  | 0.006633 | 0.016715 | 0.007971 | 2 |
| BP | GO:19035 2/88 | 26/18670  | 0.006633 | 0.016715 | 0.007971 | 2 |
| BP | GO:00091 4/88 | 158/18670 | 0.00664  | 0.016722 | 0.007974 | 4 |
| BP | GO:00026 4/88 | 159/18670 | 0.006787 | 0.01708  | 0.008145 | 4 |
| BP | GO:00514 6/88 | 357/18670 | 0.006824 | 0.017162 | 0.008184 | 6 |
| BP | GO:00512 3/88 | 82/18670  | 0.006853 | 0.017196 | 0.008201 | 3 |
| BP | GO:00517 3/88 | 82/18670  | 0.006853 | 0.017196 | 0.008201 | 3 |
| BP | GO:00900 3/88 | 82/18670  | 0.006853 | 0.017196 | 0.008201 | 3 |
| BP | GO:20000 5/88 | 253/18670 | 0.006909 | 0.017324 | 0.008262 | 5 |
| BP | GO:00067 4/88 | 160/18670 | 0.006937 | 0.017357 | 0.008277 | 4 |
| BP | GO:00075 4/88 | 160/18670 | 0.006937 | 0.017357 | 0.008277 | 4 |
| BP | GO:00326 4/88 | 160/18670 | 0.006937 | 0.017357 | 0.008277 | 4 |
| BP | GO:00425 3/88 | 83/18670  | 0.007086 | 0.017673 | 0.008428 | 3 |
| BP | GO:19038 3/88 | 83/18670  | 0.007086 | 0.017673 | 0.008428 | 3 |
| BP | GO:20001 3/88 | 83/18670  | 0.007086 | 0.017673 | 0.008428 | 3 |
| BP | GO:00326 4/88 | 161/18670 | 0.007088 | 0.017673 | 0.008428 | 4 |
| BP | GO:00359 4/88 | 161/18670 | 0.007088 | 0.017673 | 0.008428 | 4 |
| BP | GO:00020 2/88 | 27/18670  | 0.007141 | 0.017705 | 0.008443 | 2 |
| BP | GO:00028 2/88 | 27/18670  | 0.007141 | 0.017705 | 0.008443 | 2 |
| BP | GO:00067 2/88 | 27/18670  | 0.007141 | 0.017705 | 0.008443 | 2 |
| BP | GO:00723 2/88 | 27/18670  | 0.007141 | 0.017705 | 0.008443 | 2 |
| BP | GO:19016 2/88 | 27/18670  | 0.007141 | 0.017705 | 0.008443 | 2 |
| BP | GO:19052 2/88 | 27/18670  | 0.007141 | 0.017705 | 0.008443 | 2 |
| BP | GO:19055 2/88 | 27/18670  | 0.007141 | 0.017705 | 0.008443 | 2 |
| BP | GO:20001 2/88 | 27/18670  | 0.007141 | 0.017705 | 0.008443 | 2 |
| BP | GO:00905 5/88 | 256/18670 | 0.007252 | 0.017966 | 0.008568 | 5 |

|    |               |           |          |          |          |   |
|----|---------------|-----------|----------|----------|----------|---|
| BP | GO:00326 4/88 | 163/1867C | 0.007398 | 0.018302 | 0.008728 | 4 |
| BP | GO:19035 4/88 | 163/1867C | 0.007398 | 0.018302 | 0.008728 | 4 |
| BP | GO:00434 5/88 | 258/1867C | 0.007487 | 0.01851  | 0.008827 | 5 |
| BP | GO:00070 4/88 | 164/1867C | 0.007556 | 0.018665 | 0.008901 | 4 |
| BP | GO:00020 3/88 | 85/18670  | 0.007566 | 0.018665 | 0.008901 | 3 |
| BP | GO:00488 3/88 | 85/18670  | 0.007566 | 0.018665 | 0.008901 | 3 |
| BP | GO:00030 5/88 | 259/1867C | 0.007607 | 0.018743 | 0.008938 | 5 |
| BP | GO:00031 2/88 | 28/18670  | 0.007667 | 0.018743 | 0.008938 | 2 |
| BP | GO:00090 2/88 | 28/18670  | 0.007667 | 0.018743 | 0.008938 | 2 |
| BP | GO:00331 2/88 | 28/18670  | 0.007667 | 0.018743 | 0.008938 | 2 |
| BP | GO:00511 2/88 | 28/18670  | 0.007667 | 0.018743 | 0.008938 | 2 |
| BP | GO:00602 2/88 | 28/18670  | 0.007667 | 0.018743 | 0.008938 | 2 |
| BP | GO:00605 2/88 | 28/18670  | 0.007667 | 0.018743 | 0.008938 | 2 |
| BP | GO:00711 2/88 | 28/18670  | 0.007667 | 0.018743 | 0.008938 | 2 |
| BP | GO:19005 2/88 | 28/18670  | 0.007667 | 0.018743 | 0.008938 | 2 |
| BP | GO:19020 2/88 | 28/18670  | 0.007667 | 0.018743 | 0.008938 | 2 |
| BP | GO:19029 2/88 | 28/18670  | 0.007667 | 0.018743 | 0.008938 | 2 |
| BP | GO:19907 2/88 | 28/18670  | 0.007667 | 0.018743 | 0.008938 | 2 |
| BP | GO:20001 2/88 | 28/18670  | 0.007667 | 0.018743 | 0.008938 | 2 |
| BP | GO:00157 7/88 | 482/1867C | 0.007702 | 0.018816 | 0.008973 | 7 |
| BP | GO:00509 4/88 | 165/1867C | 0.007717 | 0.018837 | 0.008983 | 4 |
| BP | GO:00324 5/88 | 260/1867C | 0.007728 | 0.018839 | 0.008984 | 5 |
| BP | GO:00726 5/88 | 260/1867C | 0.007728 | 0.018839 | 0.008984 | 5 |
| BP | GO:00072 3/88 | 86/18670  | 0.007813 | 0.01902  | 0.009071 | 3 |
| BP | GO:00480 3/88 | 86/18670  | 0.007813 | 0.01902  | 0.009071 | 3 |
| BP | GO:00350 4/88 | 167/1867C | 0.008044 | 0.019565 | 0.00933  | 4 |
| BP | GO:00061 3/88 | 87/18670  | 0.008065 | 0.019565 | 0.00933  | 3 |
| BP | GO:00458 3/88 | 87/18670  | 0.008065 | 0.019565 | 0.00933  | 3 |
| BP | GO:00486 3/88 | 87/18670  | 0.008065 | 0.019565 | 0.00933  | 3 |
| BP | GO:00517 3/88 | 87/18670  | 0.008065 | 0.019565 | 0.00933  | 3 |
| BP | GO:00325 6/88 | 370/1867C | 0.008072 | 0.019568 | 0.009331 | 6 |
| BP | GO:00000 2/88 | 29/18670  | 0.00821  | 0.019728 | 0.009408 | 2 |
| BP | GO:00082 2/88 | 29/18670  | 0.00821  | 0.019728 | 0.009408 | 2 |
| BP | GO:00140 2/88 | 29/18670  | 0.00821  | 0.019728 | 0.009408 | 2 |
| BP | GO:00310 2/88 | 29/18670  | 0.00821  | 0.019728 | 0.009408 | 2 |
| BP | GO:00356 2/88 | 29/18670  | 0.00821  | 0.019728 | 0.009408 | 2 |
| BP | GO:00440 2/88 | 29/18670  | 0.00821  | 0.019728 | 0.009408 | 2 |
| BP | GO:00459 2/88 | 29/18670  | 0.00821  | 0.019728 | 0.009408 | 2 |
| BP | GO:00726 2/88 | 29/18670  | 0.00821  | 0.019728 | 0.009408 | 2 |
| BP | GO:19000 2/88 | 29/18670  | 0.00821  | 0.019728 | 0.009408 | 2 |
| BP | GO:19026 2/88 | 29/18670  | 0.00821  | 0.019728 | 0.009408 | 2 |
| BP | GO:00019 4/88 | 168/1867C | 0.008211 | 0.019728 | 0.009408 | 4 |
| BP | GO:00513 4/88 | 168/1867C | 0.008211 | 0.019728 | 0.009408 | 4 |
| BP | GO:00717 4/88 | 168/1867C | 0.008211 | 0.019728 | 0.009408 | 4 |
| BP | GO:01400 5/88 | 264/1867C | 0.008225 | 0.019749 | 0.009418 | 5 |
| BP | GO:00610 3/88 | 88/18670  | 0.008322 | 0.019953 | 0.009515 | 3 |
| BP | GO:19018 3/88 | 88/18670  | 0.008322 | 0.019953 | 0.009515 | 3 |
| BP | GO:00380 4/88 | 169/1867C | 0.00838  | 0.020066 | 0.009569 | 4 |
| BP | GO:00605 4/88 | 169/1867C | 0.00838  | 0.020066 | 0.009569 | 4 |
| BP | GO:00434 4/88 | 170/1867C | 0.008552 | 0.020463 | 0.009759 | 4 |
| BP | GO:00069 4/88 | 171/1867C | 0.008726 | 0.020851 | 0.009943 | 4 |
| BP | GO:00092 4/88 | 171/1867C | 0.008726 | 0.020851 | 0.009943 | 4 |
| BP | GO:00107 2/88 | 30/18670  | 0.00877  | 0.020856 | 0.009946 | 2 |
| BP | GO:00327 2/88 | 30/18670  | 0.00877  | 0.020856 | 0.009946 | 2 |
| BP | GO:00427 2/88 | 30/18670  | 0.00877  | 0.020856 | 0.009946 | 2 |
| BP | GO:00459 2/88 | 30/18670  | 0.00877  | 0.020856 | 0.009946 | 2 |
| BP | GO:00701 2/88 | 30/18670  | 0.00877  | 0.020856 | 0.009946 | 2 |
| BP | GO:00900 2/88 | 30/18670  | 0.00877  | 0.020856 | 0.009946 | 2 |

|    |               |           |          |          |          |   |
|----|---------------|-----------|----------|----------|----------|---|
| BP | GO:00974 2/88 | 30/18670  | 0.00877  | 0.020856 | 0.009946 | 2 |
| BP | GO:00140 3/88 | 90/18670  | 0.008849 | 0.020988 | 0.010009 | 3 |
| BP | GO:00326 3/88 | 90/18670  | 0.008849 | 0.020988 | 0.010009 | 3 |
| BP | GO:00457 3/88 | 90/18670  | 0.008849 | 0.020988 | 0.010009 | 3 |
| BP | GO:00468 3/88 | 90/18670  | 0.008849 | 0.020988 | 0.010009 | 3 |
| BP | GO:00091 4/88 | 172/18670 | 0.008902 | 0.021085 | 0.010055 | 4 |
| BP | GO:00303 4/88 | 172/18670 | 0.008902 | 0.021085 | 0.010055 | 4 |
| BP | GO:00165 4/88 | 173/18670 | 0.009081 | 0.021493 | 0.01025  | 4 |
| BP | GO:00450 6/88 | 381/18670 | 0.009249 | 0.021877 | 0.010433 | 6 |
| BP | GO:20012 4/88 | 174/18670 | 0.009262 | 0.021892 | 0.01044  | 4 |
| BP | GO:00019 2/88 | 31/18670  | 0.009346 | 0.021973 | 0.010479 | 2 |
| BP | GO:00026 2/88 | 31/18670  | 0.009346 | 0.021973 | 0.010479 | 2 |
| BP | GO:00357 2/88 | 31/18670  | 0.009346 | 0.021973 | 0.010479 | 2 |
| BP | GO:00400 2/88 | 31/18670  | 0.009346 | 0.021973 | 0.010479 | 2 |
| BP | GO:00457 2/88 | 31/18670  | 0.009346 | 0.021973 | 0.010479 | 2 |
| BP | GO:00458 2/88 | 31/18670  | 0.009346 | 0.021973 | 0.010479 | 2 |
| BP | GO:19022 2/88 | 31/18670  | 0.009346 | 0.021973 | 0.010479 | 2 |
| BP | GO:19022 2/88 | 31/18670  | 0.009346 | 0.021973 | 0.010479 | 2 |
| BP | GO:20001 4/88 | 175/18670 | 0.009445 | 0.02219  | 0.010582 | 4 |
| BP | GO:00303 4/88 | 176/18670 | 0.009631 | 0.022611 | 0.010783 | 4 |
| BP | GO:00064 3/88 | 93/18670  | 0.009677 | 0.022644 | 0.010798 | 3 |
| BP | GO:00075 3/88 | 93/18670  | 0.009677 | 0.022644 | 0.010798 | 3 |
| BP | GO:00320 3/88 | 93/18670  | 0.009677 | 0.022644 | 0.010798 | 3 |
| BP | GO:00352 3/88 | 93/18670  | 0.009677 | 0.022644 | 0.010798 | 3 |
| BP | GO:00466 3/88 | 93/18670  | 0.009677 | 0.022644 | 0.010798 | 3 |
| BP | GO:00092 4/88 | 177/18670 | 0.009818 | 0.02296  | 0.010949 | 4 |
| BP | GO:00019 2/88 | 32/18670  | 0.009939 | 0.023088 | 0.01101  | 2 |
| BP | GO:00031 2/88 | 32/18670  | 0.009939 | 0.023088 | 0.01101  | 2 |
| BP | GO:00396 2/88 | 32/18670  | 0.009939 | 0.023088 | 0.01101  | 2 |
| BP | GO:00425 2/88 | 32/18670  | 0.009939 | 0.023088 | 0.01101  | 2 |
| BP | GO:00455 2/88 | 32/18670  | 0.009939 | 0.023088 | 0.01101  | 2 |
| BP | GO:00513 2/88 | 32/18670  | 0.009939 | 0.023088 | 0.01101  | 2 |
| BP | GO:00550 2/88 | 32/18670  | 0.009939 | 0.023088 | 0.01101  | 2 |
| BP | GO:00606 2/88 | 32/18670  | 0.009939 | 0.023088 | 0.01101  | 2 |
| BP | GO:19007 2/88 | 32/18670  | 0.009939 | 0.023088 | 0.01101  | 2 |
| BP | GO:19016 2/88 | 32/18670  | 0.009939 | 0.023088 | 0.01101  | 2 |
| BP | GO:00701 3/88 | 94/18670  | 0.009962 | 0.023126 | 0.011029 | 3 |
| BP | GO:00083 4/88 | 179/18670 | 0.010201 | 0.023666 | 0.011286 | 4 |
| BP | GO:00421 3/88 | 95/18670  | 0.010253 | 0.023737 | 0.01132  | 3 |
| BP | GO:00516 3/88 | 95/18670  | 0.010253 | 0.023737 | 0.01132  | 3 |
| BP | GO:20000 3/88 | 95/18670  | 0.010253 | 0.023737 | 0.01132  | 3 |
| BP | GO:19017 4/88 | 180/18670 | 0.010396 | 0.024055 | 0.011471 | 4 |
| BP | GO:00327 3/88 | 96/18670  | 0.010548 | 0.024277 | 0.011577 | 3 |
| BP | GO:00902 3/88 | 96/18670  | 0.010548 | 0.024277 | 0.011577 | 3 |
| BP | GO:00027 2/88 | 33/18670  | 0.010548 | 0.024277 | 0.011577 | 2 |
| BP | GO:00457 2/88 | 33/18670  | 0.010548 | 0.024277 | 0.011577 | 2 |
| BP | GO:00511 2/88 | 33/18670  | 0.010548 | 0.024277 | 0.011577 | 2 |
| BP | GO:00702 2/88 | 33/18670  | 0.010548 | 0.024277 | 0.011577 | 2 |
| BP | GO:19018 2/88 | 33/18670  | 0.010548 | 0.024277 | 0.011577 | 2 |
| BP | GO:19026 2/88 | 33/18670  | 0.010548 | 0.024277 | 0.011577 | 2 |
| BP | GO:00022 4/88 | 181/18670 | 0.010594 | 0.024335 | 0.011605 | 4 |
| BP | GO:00224 4/88 | 181/18670 | 0.010594 | 0.024335 | 0.011605 | 4 |
| BP | GO:00511 4/88 | 181/18670 | 0.010594 | 0.024335 | 0.011605 | 4 |
| BP | GO:00091 4/88 | 182/18670 | 0.010794 | 0.024762 | 0.011808 | 4 |
| BP | GO:00611 4/88 | 182/18670 | 0.010794 | 0.024762 | 0.011808 | 4 |
| BP | GO:00070 3/88 | 97/18670  | 0.010848 | 0.024869 | 0.01186  | 3 |
| BP | GO:00165 5/88 | 283/18670 | 0.010893 | 0.024957 | 0.011902 | 5 |
| BP | GO:00020 4/88 | 183/18670 | 0.010996 | 0.025127 | 0.011983 | 4 |

|    |               |           |          |          |          |   |
|----|---------------|-----------|----------|----------|----------|---|
| BP | GO:00091 4/88 | 183/18670 | 0.010996 | 0.025127 | 0.011983 | 4 |
| BP | GO:00091 4/88 | 183/18670 | 0.010996 | 0.025127 | 0.011983 | 4 |
| BP | GO:00431 4/88 | 183/18670 | 0.010996 | 0.025127 | 0.011983 | 4 |
| BP | GO:00313 3/88 | 98/18670  | 0.011153 | 0.025399 | 0.012112 | 3 |
| BP | GO:00007 2/88 | 34/18670  | 0.011173 | 0.025399 | 0.012112 | 2 |
| BP | GO:00342 2/88 | 34/18670  | 0.011173 | 0.025399 | 0.012112 | 2 |
| BP | GO:00450 2/88 | 34/18670  | 0.011173 | 0.025399 | 0.012112 | 2 |
| BP | GO:00708 2/88 | 34/18670  | 0.011173 | 0.025399 | 0.012112 | 2 |
| BP | GO:00714 2/88 | 34/18670  | 0.011173 | 0.025399 | 0.012112 | 2 |
| BP | GO:01060 2/88 | 34/18670  | 0.011173 | 0.025399 | 0.012112 | 2 |
| BP | GO:19040 2/88 | 34/18670  | 0.011173 | 0.025399 | 0.012112 | 2 |
| BP | GO:00073 4/88 | 185/18670 | 0.011408 | 0.025899 | 0.012351 | 4 |
| BP | GO:19022 4/88 | 185/18670 | 0.011408 | 0.025899 | 0.012351 | 4 |
| BP | GO:00229 4/88 | 186/18670 | 0.011618 | 0.026358 | 0.01257  | 4 |
| BP | GO:00072 3/88 | 100/18670 | 0.011778 | 0.026652 | 0.01271  | 3 |
| BP | GO:00303 3/88 | 100/18670 | 0.011778 | 0.026652 | 0.01271  | 3 |
| BP | GO:00550 3/88 | 100/18670 | 0.011778 | 0.026652 | 0.01271  | 3 |
| BP | GO:00600 3/88 | 100/18670 | 0.011778 | 0.026652 | 0.01271  | 3 |
| BP | GO:00341 2/88 | 35/18670  | 0.011815 | 0.026684 | 0.012725 | 2 |
| BP | GO:00602 2/88 | 35/18670  | 0.011815 | 0.026684 | 0.012725 | 2 |
| BP | GO:19029 2/88 | 35/18670  | 0.011815 | 0.026684 | 0.012725 | 2 |
| BP | GO:19013 4/88 | 187/18670 | 0.01183  | 0.026701 | 0.012733 | 4 |
| BP | GO:00067 6/88 | 403/18670 | 0.011966 | 0.02699  | 0.012871 | 6 |
| BP | GO:00091 4/88 | 188/18670 | 0.012045 | 0.027098 | 0.012923 | 4 |
| BP | GO:00439 4/88 | 188/18670 | 0.012045 | 0.027098 | 0.012923 | 4 |
| BP | GO:00517 4/88 | 188/18670 | 0.012045 | 0.027098 | 0.012923 | 4 |
| BP | GO:19012 4/88 | 188/18670 | 0.012045 | 0.027098 | 0.012923 | 4 |
| BP | GO:00326 3/88 | 101/18670 | 0.012098 | 0.027183 | 0.012963 | 3 |
| BP | GO:00466 3/88 | 101/18670 | 0.012098 | 0.027183 | 0.012963 | 3 |
| BP | GO:00027 2/88 | 36/18670  | 0.012472 | 0.027738 | 0.013228 | 2 |
| BP | GO:00030 2/88 | 36/18670  | 0.012472 | 0.027738 | 0.013228 | 2 |
| BP | GO:00107 2/88 | 36/18670  | 0.012472 | 0.027738 | 0.013228 | 2 |
| BP | GO:00302 2/88 | 36/18670  | 0.012472 | 0.027738 | 0.013228 | 2 |
| BP | GO:00309 2/88 | 36/18670  | 0.012472 | 0.027738 | 0.013228 | 2 |
| BP | GO:00343 2/88 | 36/18670  | 0.012472 | 0.027738 | 0.013228 | 2 |
| BP | GO:00343 2/88 | 36/18670  | 0.012472 | 0.027738 | 0.013228 | 2 |
| BP | GO:00519 2/88 | 36/18670  | 0.012472 | 0.027738 | 0.013228 | 2 |
| BP | GO:00713 2/88 | 36/18670  | 0.012472 | 0.027738 | 0.013228 | 2 |
| BP | GO:00716 2/88 | 36/18670  | 0.012472 | 0.027738 | 0.013228 | 2 |
| BP | GO:00900 2/88 | 36/18670  | 0.012472 | 0.027738 | 0.013228 | 2 |
| BP | GO:00903 2/88 | 36/18670  | 0.012472 | 0.027738 | 0.013228 | 2 |
| BP | GO:19026 2/88 | 36/18670  | 0.012472 | 0.027738 | 0.013228 | 2 |
| BP | GO:19031 2/88 | 36/18670  | 0.012472 | 0.027738 | 0.013228 | 2 |
| BP | GO:20003 2/88 | 36/18670  | 0.012472 | 0.027738 | 0.013228 | 2 |
| BP | GO:20011 2/88 | 36/18670  | 0.012472 | 0.027738 | 0.013228 | 2 |
| BP | GO:00002 6/88 | 407/18670 | 0.012514 | 0.027815 | 0.013265 | 6 |
| BP | GO:00326 3/88 | 103/18670 | 0.012752 | 0.028291 | 0.013492 | 3 |
| BP | GO:00347 3/88 | 103/18670 | 0.012752 | 0.028291 | 0.013492 | 3 |
| BP | GO:00356 3/88 | 103/18670 | 0.012752 | 0.028291 | 0.013492 | 3 |
| BP | GO:00018 5/88 | 296/18670 | 0.013028 | 0.028883 | 0.013774 | 5 |
| BP | GO:00192 3/88 | 104/18670 | 0.013087 | 0.028942 | 0.013802 | 3 |
| BP | GO:00324 3/88 | 104/18670 | 0.013087 | 0.028942 | 0.013802 | 3 |
| BP | GO:00987 3/88 | 104/18670 | 0.013087 | 0.028942 | 0.013802 | 3 |
| BP | GO:19018 3/88 | 104/18670 | 0.013087 | 0.028942 | 0.013802 | 3 |
| BP | GO:00016 2/88 | 37/18670  | 0.013144 | 0.028995 | 0.013827 | 2 |
| BP | GO:00457 2/88 | 37/18670  | 0.013144 | 0.028995 | 0.013827 | 2 |
| BP | GO:00715 2/88 | 37/18670  | 0.013144 | 0.028995 | 0.013827 | 2 |
| BP | GO:19053 2/88 | 37/18670  | 0.013144 | 0.028995 | 0.013827 | 2 |

|    |          |      |           |          |          |          |   |
|----|----------|------|-----------|----------|----------|----------|---|
| BP | GO:00085 | 3/88 | 105/1867C | 0.013427 | 0.029582 | 0.014107 | 3 |
| BP | GO:00451 | 3/88 | 105/1867C | 0.013427 | 0.029582 | 0.014107 | 3 |
| BP | GO:00706 | 5/88 | 299/1867C | 0.013558 | 0.02985  | 0.014235 | 5 |
| BP | GO:00022 | 3/88 | 106/1867C | 0.013772 | 0.030284 | 0.014442 | 3 |
| BP | GO:00022 | 2/88 | 38/18670  | 0.013832 | 0.030284 | 0.014442 | 2 |
| BP | GO:00067 | 2/88 | 38/18670  | 0.013832 | 0.030284 | 0.014442 | 2 |
| BP | GO:00109 | 2/88 | 38/18670  | 0.013832 | 0.030284 | 0.014442 | 2 |
| BP | GO:00165 | 2/88 | 38/18670  | 0.013832 | 0.030284 | 0.014442 | 2 |
| BP | GO:00482 | 2/88 | 38/18670  | 0.013832 | 0.030284 | 0.014442 | 2 |
| BP | GO:00716 | 2/88 | 38/18670  | 0.013832 | 0.030284 | 0.014442 | 2 |
| BP | GO:19058 | 2/88 | 38/18670  | 0.013832 | 0.030284 | 0.014442 | 2 |
| BP | GO:20002 | 2/88 | 38/18670  | 0.013832 | 0.030284 | 0.014442 | 2 |
| BP | GO:00017 | 4/88 | 196/1867C | 0.013852 | 0.030308 | 0.014453 | 4 |
| BP | GO:00091 | 4/88 | 197/1867C | 0.014089 | 0.030789 | 0.014683 | 4 |
| BP | GO:00097 | 4/88 | 197/1867C | 0.014089 | 0.030789 | 0.014683 | 4 |
| BP | GO:00019 | 3/88 | 107/1867C | 0.014122 | 0.030841 | 0.014708 | 3 |
| BP | GO:00605 | 4/88 | 198/1867C | 0.014329 | 0.031274 | 0.014914 | 4 |
| BP | GO:00090 | 3/88 | 108/1867C | 0.014477 | 0.031529 | 0.015036 | 3 |
| BP | GO:00469 | 3/88 | 108/1867C | 0.014477 | 0.031529 | 0.015036 | 3 |
| BP | GO:00995 | 3/88 | 108/1867C | 0.014477 | 0.031529 | 0.015036 | 3 |
| BP | GO:00022 | 2/88 | 39/18670  | 0.014536 | 0.031529 | 0.015036 | 2 |
| BP | GO:00082 | 2/88 | 39/18670  | 0.014536 | 0.031529 | 0.015036 | 2 |
| BP | GO:00190 | 2/88 | 39/18670  | 0.014536 | 0.031529 | 0.015036 | 2 |
| BP | GO:00331 | 2/88 | 39/18670  | 0.014536 | 0.031529 | 0.015036 | 2 |
| BP | GO:00335 | 2/88 | 39/18670  | 0.014536 | 0.031529 | 0.015036 | 2 |
| BP | GO:00725 | 2/88 | 39/18670  | 0.014536 | 0.031529 | 0.015036 | 2 |
| BP | GO:19022 | 2/88 | 39/18670  | 0.014536 | 0.031529 | 0.015036 | 2 |
| BP | GO:00160 | 4/88 | 199/1867C | 0.014572 | 0.031587 | 0.015063 | 4 |
| BP | GO:00217 | 3/88 | 109/1867C | 0.014837 | 0.032142 | 0.015328 | 3 |
| BP | GO:00613 | 3/88 | 110/1867C | 0.015202 | 0.032912 | 0.015695 | 3 |
| BP | GO:00198 | 2/88 | 40/18670  | 0.015254 | 0.032945 | 0.015711 | 2 |
| BP | GO:00420 | 2/88 | 40/18670  | 0.015254 | 0.032945 | 0.015711 | 2 |
| BP | GO:00425 | 2/88 | 40/18670  | 0.015254 | 0.032945 | 0.015711 | 2 |
| BP | GO:00451 | 2/88 | 40/18670  | 0.015254 | 0.032945 | 0.015711 | 2 |
| BP | GO:00220 | 3/88 | 111/1867C | 0.015572 | 0.033609 | 0.016028 | 3 |
| BP | GO:00159 | 3/88 | 112/1867C | 0.015947 | 0.034318 | 0.016366 | 3 |
| BP | GO:00423 | 3/88 | 112/1867C | 0.015947 | 0.034318 | 0.016366 | 3 |
| BP | GO:00426 | 3/88 | 112/1867C | 0.015947 | 0.034318 | 0.016366 | 3 |
| BP | GO:19035 | 3/88 | 112/1867C | 0.015947 | 0.034318 | 0.016366 | 3 |
| BP | GO:00063 | 2/88 | 41/18670  | 0.015988 | 0.034318 | 0.016366 | 2 |
| BP | GO:00308 | 2/88 | 41/18670  | 0.015988 | 0.034318 | 0.016366 | 2 |
| BP | GO:00432 | 2/88 | 41/18670  | 0.015988 | 0.034318 | 0.016366 | 2 |
| BP | GO:00610 | 2/88 | 41/18670  | 0.015988 | 0.034318 | 0.016366 | 2 |
| BP | GO:00971 | 2/88 | 41/18670  | 0.015988 | 0.034318 | 0.016366 | 2 |
| BP | GO:00971 | 4/88 | 205/1867C | 0.016082 | 0.034497 | 0.016451 | 4 |
| BP | GO:00326 | 3/88 | 113/1867C | 0.016327 | 0.035002 | 0.016692 | 3 |
| BP | GO:00302 | 3/88 | 114/1867C | 0.016712 | 0.035706 | 0.017027 | 3 |
| BP | GO:00302 | 3/88 | 114/1867C | 0.016712 | 0.035706 | 0.017027 | 3 |
| BP | GO:00454 | 3/88 | 114/1867C | 0.016712 | 0.035706 | 0.017027 | 3 |
| BP | GO:00065 | 2/88 | 42/18670  | 0.016737 | 0.035706 | 0.017027 | 2 |
| BP | GO:00106 | 2/88 | 42/18670  | 0.016737 | 0.035706 | 0.017027 | 2 |
| BP | GO:00421 | 2/88 | 42/18670  | 0.016737 | 0.035706 | 0.017027 | 2 |
| BP | GO:00511 | 2/88 | 42/18670  | 0.016737 | 0.035706 | 0.017027 | 2 |
| BP | GO:19031 | 2/88 | 42/18670  | 0.016737 | 0.035706 | 0.017027 | 2 |
| BP | GO:00091 | 4/88 | 208/1867C | 0.016872 | 0.035972 | 0.017155 | 4 |
| BP | GO:00019 | 2/88 | 43/18670  | 0.0175   | 0.03713  | 0.017707 | 2 |
| BP | GO:00108 | 2/88 | 43/18670  | 0.0175   | 0.03713  | 0.017707 | 2 |
| BP | GO:00331 | 2/88 | 43/18670  | 0.0175   | 0.03713  | 0.017707 | 2 |

|    |               |           |          |          |          |   |
|----|---------------|-----------|----------|----------|----------|---|
| BP | GO:00420 2/88 | 43/18670  | 0.0175   | 0.03713  | 0.017707 | 2 |
| BP | GO:00436 2/88 | 43/18670  | 0.0175   | 0.03713  | 0.017707 | 2 |
| BP | GO:00457 2/88 | 43/18670  | 0.0175   | 0.03713  | 0.017707 | 2 |
| BP | GO:00516 2/88 | 43/18670  | 0.0175   | 0.03713  | 0.017707 | 2 |
| BP | GO:00713 2/88 | 43/18670  | 0.0175   | 0.03713  | 0.017707 | 2 |
| BP | GO:00313 3/88 | 117/18670 | 0.017898 | 0.03793  | 0.018088 | 3 |
| BP | GO:00511 3/88 | 117/18670 | 0.017898 | 0.03793  | 0.018088 | 3 |
| BP | GO:00031 2/88 | 44/18670  | 0.018278 | 0.038571 | 0.018394 | 2 |
| BP | GO:00380 2/88 | 44/18670  | 0.018278 | 0.038571 | 0.018394 | 2 |
| BP | GO:00429 2/88 | 44/18670  | 0.018278 | 0.038571 | 0.018394 | 2 |
| BP | GO:00617 2/88 | 44/18670  | 0.018278 | 0.038571 | 0.018394 | 2 |
| BP | GO:00708 2/88 | 44/18670  | 0.018278 | 0.038571 | 0.018394 | 2 |
| BP | GO:00716 2/88 | 44/18670  | 0.018278 | 0.038571 | 0.018394 | 2 |
| BP | GO:19035 2/88 | 44/18670  | 0.018278 | 0.038571 | 0.018394 | 2 |
| BP | GO:00019 2/88 | 45/18670  | 0.01907  | 0.040146 | 0.019145 | 2 |
| BP | GO:00323 2/88 | 45/18670  | 0.01907  | 0.040146 | 0.019145 | 2 |
| BP | GO:00484 2/88 | 45/18670  | 0.01907  | 0.040146 | 0.019145 | 2 |
| BP | GO:19002 2/88 | 45/18670  | 0.01907  | 0.040146 | 0.019145 | 2 |
| BP | GO:00026 4/88 | 216/18670 | 0.019098 | 0.04018  | 0.019161 | 4 |
| BP | GO:00170 3/88 | 120/18670 | 0.019131 | 0.040201 | 0.019171 | 3 |
| BP | GO:19030 3/88 | 120/18670 | 0.019131 | 0.040201 | 0.019171 | 3 |
| BP | GO:00017 3/88 | 121/18670 | 0.019552 | 0.041036 | 0.019569 | 3 |
| BP | GO:00486 3/88 | 121/18670 | 0.019552 | 0.041036 | 0.019569 | 3 |
| BP | GO:00071 2/88 | 46/18670  | 0.019877 | 0.041494 | 0.019788 | 2 |
| BP | GO:00140 2/88 | 46/18670  | 0.019877 | 0.041494 | 0.019788 | 2 |
| BP | GO:00433 2/88 | 46/18670  | 0.019877 | 0.041494 | 0.019788 | 2 |
| BP | GO:00440 2/88 | 46/18670  | 0.019877 | 0.041494 | 0.019788 | 2 |
| BP | GO:00513 2/88 | 46/18670  | 0.019877 | 0.041494 | 0.019788 | 2 |
| BP | GO:00713 2/88 | 46/18670  | 0.019877 | 0.041494 | 0.019788 | 2 |
| BP | GO:00716 2/88 | 46/18670  | 0.019877 | 0.041494 | 0.019788 | 2 |
| BP | GO:00977 2/88 | 46/18670  | 0.019877 | 0.041494 | 0.019788 | 2 |
| BP | GO:19000 2/88 | 46/18670  | 0.019877 | 0.041494 | 0.019788 | 2 |
| BP | GO:00324 3/88 | 122/18670 | 0.019978 | 0.041656 | 0.019865 | 3 |
| BP | GO:19038 3/88 | 122/18670 | 0.019978 | 0.041656 | 0.019865 | 3 |
| BP | GO:00149 2/88 | 47/18670  | 0.020697 | 0.042952 | 0.020483 | 2 |
| BP | GO:00319 2/88 | 47/18670  | 0.020697 | 0.042952 | 0.020483 | 2 |
| BP | GO:00357 2/88 | 47/18670  | 0.020697 | 0.042952 | 0.020483 | 2 |
| BP | GO:00425 2/88 | 47/18670  | 0.020697 | 0.042952 | 0.020483 | 2 |
| BP | GO:00480 2/88 | 47/18670  | 0.020697 | 0.042952 | 0.020483 | 2 |
| BP | GO:00504 2/88 | 47/18670  | 0.020697 | 0.042952 | 0.020483 | 2 |
| BP | GO:19007 2/88 | 47/18670  | 0.020697 | 0.042952 | 0.020483 | 2 |
| BP | GO:19035 2/88 | 47/18670  | 0.020697 | 0.042952 | 0.020483 | 2 |
| BP | GO:00512 3/88 | 124/18670 | 0.020845 | 0.043233 | 0.020617 | 3 |
| BP | GO:00026 6/88 | 458/18670 | 0.021135 | 0.043782 | 0.020879 | 6 |
| BP | GO:00068 6/88 | 458/18670 | 0.021135 | 0.043782 | 0.020879 | 6 |
| BP | GO:00017 2/88 | 48/18670  | 0.021532 | 0.044342 | 0.021146 | 2 |
| BP | GO:00022 2/88 | 48/18670  | 0.021532 | 0.044342 | 0.021146 | 2 |
| BP | GO:00075 2/88 | 48/18670  | 0.021532 | 0.044342 | 0.021146 | 2 |
| BP | GO:00080 2/88 | 48/18670  | 0.021532 | 0.044342 | 0.021146 | 2 |
| BP | GO:00352 2/88 | 48/18670  | 0.021532 | 0.044342 | 0.021146 | 2 |
| BP | GO:00468 2/88 | 48/18670  | 0.021532 | 0.044342 | 0.021146 | 2 |
| BP | GO:00603 2/88 | 48/18670  | 0.021532 | 0.044342 | 0.021146 | 2 |
| BP | GO:00726 2/88 | 48/18670  | 0.021532 | 0.044342 | 0.021146 | 2 |
| BP | GO:01010 2/88 | 48/18670  | 0.021532 | 0.044342 | 0.021146 | 2 |
| BP | GO:19055 2/88 | 48/18670  | 0.021532 | 0.044342 | 0.021146 | 2 |
| BP | GO:00512 3/88 | 126/18670 | 0.021733 | 0.044704 | 0.021319 | 3 |
| BP | GO:00901 3/88 | 126/18670 | 0.021733 | 0.044704 | 0.021319 | 3 |
| BP | GO:00344 4/88 | 226/18670 | 0.022126 | 0.045485 | 0.021691 | 4 |

|    |               |           |          |          |          |   |
|----|---------------|-----------|----------|----------|----------|---|
| BP | GO:00025 2/88 | 49/18670  | 0.02238  | 0.045793 | 0.021838 | 2 |
| BP | GO:00030 2/88 | 49/18670  | 0.02238  | 0.045793 | 0.021838 | 2 |
| BP | GO:00032 2/88 | 49/18670  | 0.02238  | 0.045793 | 0.021838 | 2 |
| BP | GO:00431 2/88 | 49/18670  | 0.02238  | 0.045793 | 0.021838 | 2 |
| BP | GO:00619 2/88 | 49/18670  | 0.02238  | 0.045793 | 0.021838 | 2 |
| BP | GO:00713 2/88 | 49/18670  | 0.02238  | 0.045793 | 0.021838 | 2 |
| BP | GO:00717 2/88 | 49/18670  | 0.02238  | 0.045793 | 0.021838 | 2 |
| BP | GO:19015 2/88 | 49/18670  | 0.02238  | 0.045793 | 0.021838 | 2 |
| BP | GO:00064 4/88 | 227/18670 | 0.022444 | 0.045896 | 0.021887 | 4 |
| BP | GO:00512 3/88 | 128/18670 | 0.022641 | 0.046273 | 0.022067 | 3 |
| BP | GO:00032 3/88 | 129/18670 | 0.023103 | 0.047162 | 0.022491 | 3 |
| BP | GO:00508 3/88 | 129/18670 | 0.023103 | 0.047162 | 0.022491 | 3 |
| BP | GO:00074 6/88 | 468/18670 | 0.023205 | 0.047281 | 0.022548 | 6 |
| BP | GO:00140 2/88 | 50/18670  | 0.023242 | 0.047281 | 0.022548 | 2 |
| BP | GO:00455 2/88 | 50/18670  | 0.023242 | 0.047281 | 0.022548 | 2 |
| BP | GO:00706 2/88 | 50/18670  | 0.023242 | 0.047281 | 0.022548 | 2 |
| BP | GO:00707 2/88 | 50/18670  | 0.023242 | 0.047281 | 0.022548 | 2 |
| BP | GO:01061 2/88 | 50/18670  | 0.023242 | 0.047281 | 0.022548 | 2 |
| BP | GO:00550 6/88 | 471/18670 | 0.023852 | 0.048493 | 0.023125 | 6 |
| BP | GO:00512 3/88 | 131/18670 | 0.024042 | 0.048824 | 0.023283 | 3 |
| BP | GO:00550 3/88 | 131/18670 | 0.024042 | 0.048824 | 0.023283 | 3 |
| BP | GO:00019 2/88 | 51/18670  | 0.024118 | 0.04892  | 0.023329 | 2 |
| BP | GO:20012 2/88 | 51/18670  | 0.024118 | 0.04892  | 0.023329 | 2 |
| BP | GO:00723 3/88 | 132/18670 | 0.02452  | 0.049706 | 0.023704 | 3 |
| BP | GO:00031 2/88 | 52/18670  | 0.025007 | 0.050606 | 0.024133 | 2 |
| BP | GO:00315 2/88 | 52/18670  | 0.025007 | 0.050606 | 0.024133 | 2 |
| BP | GO:20006 2/88 | 52/18670  | 0.025007 | 0.050606 | 0.024133 | 2 |
| BP | GO:00512 5/88 | 351/18670 | 0.025164 | 0.050895 | 0.024271 | 5 |
| BP | GO:00072 3/88 | 134/18670 | 0.02549  | 0.051494 | 0.024556 | 3 |
| BP | GO:00083 3/88 | 134/18670 | 0.02549  | 0.051494 | 0.024556 | 3 |
| BP | GO:00430 6/88 | 479/18670 | 0.025636 | 0.051759 | 0.024683 | 6 |
| BP | GO:00001 2/88 | 53/18670  | 0.025909 | 0.052101 | 0.024846 | 2 |
| BP | GO:00069 2/88 | 53/18670  | 0.025909 | 0.052101 | 0.024846 | 2 |
| BP | GO:00380 2/88 | 53/18670  | 0.025909 | 0.052101 | 0.024846 | 2 |
| BP | GO:00433 2/88 | 53/18670  | 0.025909 | 0.052101 | 0.024846 | 2 |
| BP | GO:00457 2/88 | 53/18670  | 0.025909 | 0.052101 | 0.024846 | 2 |
| BP | GO:00605 2/88 | 53/18670  | 0.025909 | 0.052101 | 0.024846 | 2 |
| BP | GO:19055 2/88 | 53/18670  | 0.025909 | 0.052101 | 0.024846 | 2 |
| BP | GO:00603 3/88 | 135/18670 | 0.025982 | 0.052188 | 0.024888 | 3 |
| BP | GO:19033 3/88 | 135/18670 | 0.025982 | 0.052188 | 0.024888 | 3 |
| BP | GO:00510 4/88 | 238/18670 | 0.026127 | 0.052449 | 0.025012 | 4 |
| BP | GO:00224 5/88 | 357/18670 | 0.026816 | 0.053787 | 0.02565  | 5 |
| BP | GO:00326 2/88 | 54/18670  | 0.026825 | 0.053787 | 0.02565  | 2 |
| BP | GO:19036 3/88 | 137/18670 | 0.026983 | 0.054073 | 0.025787 | 3 |
| BP | GO:00343 4/88 | 241/18670 | 0.027191 | 0.05446  | 0.025971 | 4 |
| BP | GO:00423 2/88 | 55/18670  | 0.027753 | 0.05549  | 0.026462 | 2 |
| BP | GO:00480 2/88 | 55/18670  | 0.027753 | 0.05549  | 0.026462 | 2 |
| BP | GO:00610 2/88 | 55/18670  | 0.027753 | 0.05549  | 0.026462 | 2 |
| BP | GO:00027 3/88 | 139/18670 | 0.028004 | 0.055928 | 0.026671 | 3 |
| BP | GO:00455 3/88 | 139/18670 | 0.028004 | 0.055928 | 0.026671 | 3 |
| BP | GO:00463 3/88 | 140/18670 | 0.028522 | 0.056865 | 0.027118 | 3 |
| BP | GO:00600 3/88 | 140/18670 | 0.028522 | 0.056865 | 0.027118 | 3 |
| BP | GO:00975 3/88 | 140/18670 | 0.028522 | 0.056865 | 0.027118 | 3 |
| BP | GO:00067 2/88 | 56/18670  | 0.028694 | 0.057111 | 0.027235 | 2 |
| BP | GO:00606 2/88 | 56/18670  | 0.028694 | 0.057111 | 0.027235 | 2 |
| BP | GO:00901 2/88 | 56/18670  | 0.028694 | 0.057111 | 0.027235 | 2 |
| BP | GO:00725 6/88 | 493/18670 | 0.028969 | 0.057625 | 0.027481 | 6 |
| BP | GO:19033 4/88 | 247/18670 | 0.029396 | 0.058442 | 0.02787  | 4 |

|    |               |           |          |          |          |   |
|----|---------------|-----------|----------|----------|----------|---|
| BP | GO:00017 2/88 | 57/18670  | 0.029648 | 0.058842 | 0.028061 | 2 |
| BP | GO:00480 2/88 | 57/18670  | 0.029648 | 0.058842 | 0.028061 | 2 |
| BP | GO:00510 2/88 | 57/18670  | 0.029648 | 0.058842 | 0.028061 | 2 |
| BP | GO:01061 3/88 | 143/18670 | 0.030107 | 0.059686 | 0.028463 | 3 |
| BP | GO:01201 3/88 | 143/18670 | 0.030107 | 0.059686 | 0.028463 | 3 |
| BP | GO:00421 6/88 | 498/18670 | 0.030226 | 0.059887 | 0.028559 | 6 |
| BP | GO:00024 6/88 | 499/18670 | 0.030481 | 0.060359 | 0.028784 | 6 |
| BP | GO:00600 3/88 | 144/18670 | 0.030645 | 0.06065  | 0.028923 | 3 |
| BP | GO:00018 2/88 | 59/18670  | 0.031593 | 0.062349 | 0.029733 | 2 |
| BP | GO:00105 2/88 | 59/18670  | 0.031593 | 0.062349 | 0.029733 | 2 |
| BP | GO:00328 2/88 | 59/18670  | 0.031593 | 0.062349 | 0.029733 | 2 |
| BP | GO:00336 2/88 | 59/18670  | 0.031593 | 0.062349 | 0.029733 | 2 |
| BP | GO:00610 2/88 | 59/18670  | 0.031593 | 0.062349 | 0.029733 | 2 |
| BP | GO:00181 2/88 | 60/18670  | 0.032584 | 0.064233 | 0.030632 | 2 |
| BP | GO:00330 2/88 | 60/18670  | 0.032584 | 0.064233 | 0.030632 | 2 |
| BP | GO:00082 3/88 | 149/18670 | 0.033414 | 0.065758 | 0.031359 | 3 |
| BP | GO:00485 3/88 | 149/18670 | 0.033414 | 0.065758 | 0.031359 | 3 |
| BP | GO:20000 3/88 | 149/18670 | 0.033414 | 0.065758 | 0.031359 | 3 |
| BP | GO:00031 2/88 | 61/18670  | 0.033587 | 0.065914 | 0.031433 | 2 |
| BP | GO:00074 2/88 | 61/18670  | 0.033587 | 0.065914 | 0.031433 | 2 |
| BP | GO:00305 2/88 | 61/18670  | 0.033587 | 0.065914 | 0.031433 | 2 |
| BP | GO:00341 2/88 | 61/18670  | 0.033587 | 0.065914 | 0.031433 | 2 |
| BP | GO:00486 2/88 | 61/18670  | 0.033587 | 0.065914 | 0.031433 | 2 |
| BP | GO:00163 3/88 | 150/18670 | 0.033983 | 0.066616 | 0.031768 | 3 |
| BP | GO:00507 3/88 | 150/18670 | 0.033983 | 0.066616 | 0.031768 | 3 |
| BP | GO:00550 3/88 | 151/18670 | 0.034557 | 0.06749  | 0.032185 | 3 |
| BP | GO:19031 3/88 | 151/18670 | 0.034557 | 0.06749  | 0.032185 | 3 |
| BP | GO:00065 2/88 | 62/18670  | 0.034602 | 0.06749  | 0.032185 | 2 |
| BP | GO:00108 2/88 | 62/18670  | 0.034602 | 0.06749  | 0.032185 | 2 |
| BP | GO:00326 2/88 | 62/18670  | 0.034602 | 0.06749  | 0.032185 | 2 |
| BP | GO:00328 2/88 | 62/18670  | 0.034602 | 0.06749  | 0.032185 | 2 |
| BP | GO:00466 2/88 | 62/18670  | 0.034602 | 0.06749  | 0.032185 | 2 |
| BP | GO:00488 2/88 | 62/18670  | 0.034602 | 0.06749  | 0.032185 | 2 |
| BP | GO:00550 2/88 | 62/18670  | 0.034602 | 0.06749  | 0.032185 | 2 |
| BP | GO:00309 3/88 | 152/18670 | 0.035136 | 0.068455 | 0.032645 | 3 |
| BP | GO:00326 3/88 | 152/18670 | 0.035136 | 0.068455 | 0.032645 | 3 |
| BP | GO:00072 4/88 | 262/18670 | 0.035364 | 0.068861 | 0.032839 | 4 |
| BP | GO:00075 2/88 | 63/18670  | 0.03563  | 0.069147 | 0.032975 | 2 |
| BP | GO:00323 2/88 | 63/18670  | 0.03563  | 0.069147 | 0.032975 | 2 |
| BP | GO:00323 2/88 | 63/18670  | 0.03563  | 0.069147 | 0.032975 | 2 |
| BP | GO:00429 2/88 | 63/18670  | 0.03563  | 0.069147 | 0.032975 | 2 |
| BP | GO:00466 2/88 | 63/18670  | 0.03563  | 0.069147 | 0.032975 | 2 |
| BP | GO:00901 2/88 | 63/18670  | 0.03563  | 0.069147 | 0.032975 | 2 |
| BP | GO:00342 3/88 | 153/18670 | 0.03572  | 0.069284 | 0.033041 | 3 |
| BP | GO:00550 3/88 | 154/18670 | 0.036309 | 0.070349 | 0.033548 | 3 |
| BP | GO:19908 3/88 | 154/18670 | 0.036309 | 0.070349 | 0.033548 | 3 |
| BP | GO:00364 2/88 | 64/18670  | 0.036668 | 0.07081  | 0.033768 | 2 |
| BP | GO:00435 2/88 | 64/18670  | 0.036668 | 0.07081  | 0.033768 | 2 |
| BP | GO:00456 2/88 | 64/18670  | 0.036668 | 0.07081  | 0.033768 | 2 |
| BP | GO:00456 2/88 | 64/18670  | 0.036668 | 0.07081  | 0.033768 | 2 |
| BP | GO:00482 2/88 | 64/18670  | 0.036668 | 0.07081  | 0.033768 | 2 |
| BP | GO:00509 2/88 | 64/18670  | 0.036668 | 0.07081  | 0.033768 | 2 |
| BP | GO:00448 4/88 | 266/18670 | 0.037066 | 0.071538 | 0.034116 | 4 |
| BP | GO:00148 2/88 | 65/18670  | 0.037719 | 0.072718 | 0.034678 | 2 |
| BP | GO:00511 2/88 | 65/18670  | 0.037719 | 0.072718 | 0.034678 | 2 |
| BP | GO:00466 2/88 | 66/18670  | 0.038781 | 0.074683 | 0.035615 | 2 |
| BP | GO:19052 2/88 | 66/18670  | 0.038781 | 0.074683 | 0.035615 | 2 |
| BP | GO:20005 2/88 | 67/18670  | 0.039854 | 0.076708 | 0.036581 | 2 |



|    |               |           |          |          |          |   |
|----|---------------|-----------|----------|----------|----------|---|
| BP | GO:00028 3/88 | 160/18670 | 0.039948 | 0.076805 | 0.036627 | 3 |
| BP | GO:00302 3/88 | 160/18670 | 0.039948 | 0.076805 | 0.036627 | 3 |
| BP | GO:00614 4/88 | 273/18670 | 0.040157 | 0.077163 | 0.036798 | 4 |
| BP | GO:00109 3/88 | 161/18670 | 0.040572 | 0.077876 | 0.037138 | 3 |
| BP | GO:00991 3/88 | 161/18670 | 0.040572 | 0.077876 | 0.037138 | 3 |
| BP | GO:00062 4/88 | 274/18670 | 0.04061  | 0.077906 | 0.037152 | 4 |
| BP | GO:00108 2/88 | 68/18670  | 0.040939 | 0.078322 | 0.037351 | 2 |
| BP | GO:00313 2/88 | 68/18670  | 0.040939 | 0.078322 | 0.037351 | 2 |
| BP | GO:00359 2/88 | 68/18670  | 0.040939 | 0.078322 | 0.037351 | 2 |
| BP | GO:00463 2/88 | 68/18670  | 0.040939 | 0.078322 | 0.037351 | 2 |
| BP | GO:00712 2/88 | 68/18670  | 0.040939 | 0.078322 | 0.037351 | 2 |
| BP | GO:00435 5/88 | 405/18670 | 0.042535 | 0.081333 | 0.038786 | 5 |
| BP | GO:00070 2/88 | 70/18670  | 0.043141 | 0.08231  | 0.039253 | 2 |
| BP | GO:00105 2/88 | 70/18670  | 0.043141 | 0.08231  | 0.039253 | 2 |
| BP | GO:00603 2/88 | 70/18670  | 0.043141 | 0.08231  | 0.039253 | 2 |
| BP | GO:00720 2/88 | 70/18670  | 0.043141 | 0.08231  | 0.039253 | 2 |
| BP | GO:00022 3/88 | 166/18670 | 0.043766 | 0.083412 | 0.039778 | 3 |
| BP | GO:00902 3/88 | 166/18670 | 0.043766 | 0.083412 | 0.039778 | 3 |
| BP | GO:00424 2/88 | 71/18670  | 0.044258 | 0.084259 | 0.040182 | 2 |
| BP | GO:00425 2/88 | 71/18670  | 0.044258 | 0.084259 | 0.040182 | 2 |
| BP | GO:19901 3/88 | 168/18670 | 0.045077 | 0.085146 | 0.040605 | 3 |
| BP | GO:00320 2/88 | 72/18670  | 0.045386 | 0.085146 | 0.040605 | 2 |
| BP | GO:00508 2/88 | 72/18670  | 0.045386 | 0.085146 | 0.040605 | 2 |
| BP | GO:00601 2/88 | 72/18670  | 0.045386 | 0.085146 | 0.040605 | 2 |
| BP | GO:00456 3/88 | 169/18670 | 0.045741 | 0.085146 | 0.040605 | 3 |
| BP | GO:00022 1/88 | 10/18670  | 0.046158 | 0.085146 | 0.040605 | 1 |
| BP | GO:00071 1/88 | 10/18670  | 0.046158 | 0.085146 | 0.040605 | 1 |
| BP | GO:00107 1/88 | 10/18670  | 0.046158 | 0.085146 | 0.040605 | 1 |
| BP | GO:00107 1/88 | 10/18670  | 0.046158 | 0.085146 | 0.040605 | 1 |
| BP | GO:00109 1/88 | 10/18670  | 0.046158 | 0.085146 | 0.040605 | 1 |
| BP | GO:00140 1/88 | 10/18670  | 0.046158 | 0.085146 | 0.040605 | 1 |
| BP | GO:00190 1/88 | 10/18670  | 0.046158 | 0.085146 | 0.040605 | 1 |
| BP | GO:00215 1/88 | 10/18670  | 0.046158 | 0.085146 | 0.040605 | 1 |
| BP | GO:00303 1/88 | 10/18670  | 0.046158 | 0.085146 | 0.040605 | 1 |
| BP | GO:00320 1/88 | 10/18670  | 0.046158 | 0.085146 | 0.040605 | 1 |
| BP | GO:00320 1/88 | 10/18670  | 0.046158 | 0.085146 | 0.040605 | 1 |
| BP | GO:00320 1/88 | 10/18670  | 0.046158 | 0.085146 | 0.040605 | 1 |
| BP | GO:00323 1/88 | 10/18670  | 0.046158 | 0.085146 | 0.040605 | 1 |
| BP | GO:00340 1/88 | 10/18670  | 0.046158 | 0.085146 | 0.040605 | 1 |
| BP | GO:00343 1/88 | 10/18670  | 0.046158 | 0.085146 | 0.040605 | 1 |
| BP | GO:00358 1/88 | 10/18670  | 0.046158 | 0.085146 | 0.040605 | 1 |
| BP | GO:00365 1/88 | 10/18670  | 0.046158 | 0.085146 | 0.040605 | 1 |
| BP | GO:00436 1/88 | 10/18670  | 0.046158 | 0.085146 | 0.040605 | 1 |
| BP | GO:00443 1/88 | 10/18670  | 0.046158 | 0.085146 | 0.040605 | 1 |
| BP | GO:00445 1/88 | 10/18670  | 0.046158 | 0.085146 | 0.040605 | 1 |
| BP | GO:00453 1/88 | 10/18670  | 0.046158 | 0.085146 | 0.040605 | 1 |
| BP | GO:00456 1/88 | 10/18670  | 0.046158 | 0.085146 | 0.040605 | 1 |
| BP | GO:00457 1/88 | 10/18670  | 0.046158 | 0.085146 | 0.040605 | 1 |
| BP | GO:00457 1/88 | 10/18670  | 0.046158 | 0.085146 | 0.040605 | 1 |
| BP | GO:00457 1/88 | 10/18670  | 0.046158 | 0.085146 | 0.040605 | 1 |
| BP | GO:00459 1/88 | 10/18670  | 0.046158 | 0.085146 | 0.040605 | 1 |
| BP | GO:00463 1/88 | 10/18670  | 0.046158 | 0.085146 | 0.040605 | 1 |
| BP | GO:00511 1/88 | 10/18670  | 0.046158 | 0.085146 | 0.040605 | 1 |
| BP | GO:00519 1/88 | 10/18670  | 0.046158 | 0.085146 | 0.040605 | 1 |
| BP | GO:00522 1/88 | 10/18670  | 0.046158 | 0.085146 | 0.040605 | 1 |
| BP | GO:00603 1/88 | 10/18670  | 0.046158 | 0.085146 | 0.040605 | 1 |
| BP | GO:00605 1/88 | 10/18670  | 0.046158 | 0.085146 | 0.040605 | 1 |
| BP | GO:00607 1/88 | 10/18670  | 0.046158 | 0.085146 | 0.040605 | 1 |
| BP | GO:00612 1/88 | 10/18670  | 0.046158 | 0.085146 | 0.040605 | 1 |

|    |                |           |          |          |          |    |
|----|----------------|-----------|----------|----------|----------|----|
| BP | GO:00700 1/88  | 10/18670  | 0.046158 | 0.085146 | 0.040605 | 1  |
| BP | GO:00703 1/88  | 10/18670  | 0.046158 | 0.085146 | 0.040605 | 1  |
| BP | GO:00703 1/88  | 10/18670  | 0.046158 | 0.085146 | 0.040605 | 1  |
| BP | GO:00709 1/88  | 10/18670  | 0.046158 | 0.085146 | 0.040605 | 1  |
| BP | GO:00712 1/88  | 10/18670  | 0.046158 | 0.085146 | 0.040605 | 1  |
| BP | GO:00721 1/88  | 10/18670  | 0.046158 | 0.085146 | 0.040605 | 1  |
| BP | GO:00903 1/88  | 10/18670  | 0.046158 | 0.085146 | 0.040605 | 1  |
| BP | GO:00905 1/88  | 10/18670  | 0.046158 | 0.085146 | 0.040605 | 1  |
| BP | GO:01060 1/88  | 10/18670  | 0.046158 | 0.085146 | 0.040605 | 1  |
| BP | GO:01100 1/88  | 10/18670  | 0.046158 | 0.085146 | 0.040605 | 1  |
| BP | GO:01400 1/88  | 10/18670  | 0.046158 | 0.085146 | 0.040605 | 1  |
| BP | GO:19001 1/88  | 10/18670  | 0.046158 | 0.085146 | 0.040605 | 1  |
| BP | GO:19002 1/88  | 10/18670  | 0.046158 | 0.085146 | 0.040605 | 1  |
| BP | GO:19021 1/88  | 10/18670  | 0.046158 | 0.085146 | 0.040605 | 1  |
| BP | GO:19033 1/88  | 10/18670  | 0.046158 | 0.085146 | 0.040605 | 1  |
| BP | GO:19038 1/88  | 10/18670  | 0.046158 | 0.085146 | 0.040605 | 1  |
| BP | GO:19043 1/88  | 10/18670  | 0.046158 | 0.085146 | 0.040605 | 1  |
| BP | GO:19047 1/88  | 10/18670  | 0.046158 | 0.085146 | 0.040605 | 1  |
| BP | GO:20004 1/88  | 10/18670  | 0.046158 | 0.085146 | 0.040605 | 1  |
| BP | GO:20010 1/88  | 10/18670  | 0.046158 | 0.085146 | 0.040605 | 1  |
| BP | GO:20012 1/88  | 10/18670  | 0.046158 | 0.085146 | 0.040605 | 1  |
| BP | GO:00060 3/88  | 170/18670 | 0.046409 | 0.085563 | 0.040804 | 3  |
| BP | GO:00456 2/88  | 73/18670  | 0.046525 | 0.085687 | 0.040863 | 2  |
| BP | GO:19019 2/88  | 73/18670  | 0.046525 | 0.085687 | 0.040863 | 2  |
| BP | GO:00032 3/88  | 171/18670 | 0.047082 | 0.086667 | 0.04133  | 3  |
| BP | GO:00485 4/88  | 288/18670 | 0.047262 | 0.086953 | 0.041466 | 4  |
| BP | GO:00018 2/88  | 74/18670  | 0.047674 | 0.087528 | 0.041741 | 2  |
| BP | GO:00060 2/88  | 74/18670  | 0.047674 | 0.087528 | 0.041741 | 2  |
| BP | GO:00090 2/88  | 74/18670  | 0.047674 | 0.087528 | 0.041741 | 2  |
| BP | GO:19000 2/88  | 74/18670  | 0.047674 | 0.087528 | 0.041741 | 2  |
| BP | GO:00328 3/88  | 172/18670 | 0.047759 | 0.087638 | 0.041793 | 3  |
| BP | GO:00431 5/88  | 419/18670 | 0.047984 | 0.088005 | 0.041968 | 5  |
| BP | GO:00343 4/88  | 290/18670 | 0.048259 | 0.088462 | 0.042186 | 4  |
| BP | GO:00703 3/88  | 173/18670 | 0.048442 | 0.088751 | 0.042324 | 3  |
| BP | GO:00019 2/88  | 75/18670  | 0.048834 | 0.089375 | 0.042622 | 2  |
| BP | GO:00066 2/88  | 75/18670  | 0.048834 | 0.089375 | 0.042622 | 2  |
| BP | GO:00026 3/88  | 175/18670 | 0.049821 | 0.090581 | 0.043197 | 3  |
| BP | GO:00109 3/88  | 175/18670 | 0.049821 | 0.090581 | 0.043197 | 3  |
| CC | GO:00451 15/88 | 315/19717 | 8.98E-12 | 1.13E-09 | 9.14E-10 | 15 |
| CC | GO:00988 15/88 | 316/19717 | 9.39E-12 | 1.13E-09 | 9.14E-10 | 15 |
| CC | GO:00985 15/88 | 328/19717 | 1.59E-11 | 1.28E-09 | 1.04E-09 | 15 |
| CC | GO:00905 9/88  | 163/19717 | 4.72E-08 | 2.83E-06 | 2.30E-06 | 9  |
| CC | GO:00447 9/88  | 201/19717 | 2.83E-07 | 1.36E-05 | 1.10E-05 | 9  |
| CC | GO:00056 11/88 | 365/19717 | 6.74E-07 | 2.70E-05 | 2.19E-05 | 11 |
| CC | GO:00007 10/88 | 377/19717 | 6.95E-06 | 0.000238 | 0.000193 | 10 |
| CC | GO:00448 6/88  | 109/19717 | 9.32E-06 | 0.00028  | 0.000227 | 6  |
| CC | GO:00059 5/88  | 80/19717  | 2.92E-05 | 0.000778 | 0.000631 | 5  |
| CC | GO:00451 9/88  | 384/19717 | 5.41E-05 | 0.001297 | 0.001053 | 9  |
| CC | GO:00098 9/88  | 393/19717 | 6.46E-05 | 0.001409 | 0.001143 | 9  |
| CC | GO:00620 9/88  | 406/19717 | 8.28E-05 | 0.001657 | 0.001344 | 9  |
| CC | GO:00099 3/88  | 34/19717  | 0.000465 | 0.007981 | 0.006476 | 3  |
| CC | GO:00057 7/88  | 309/19717 | 0.000466 | 0.007981 | 0.006476 | 7  |
| CC | GO:01201 4/88  | 84/19717  | 0.000544 | 0.008283 | 0.006721 | 4  |
| CC | GO:00163 7/88  | 318/19717 | 0.000552 | 0.008283 | 0.006721 | 7  |
| CC | GO:00319 7/88  | 339/19717 | 0.000805 | 0.011361 | 0.009219 | 7  |
| CC | GO:00003 3/88  | 42/19717  | 0.00087  | 0.011594 | 0.009408 | 3  |
| CC | GO:00057 5/88  | 178/19717 | 0.001213 | 0.015322 | 0.012432 | 5  |
| CC | GO:00432 3/88  | 49/19717  | 0.001365 | 0.016374 | 0.013286 | 3  |

|    |                |           |          |          |          |    |
|----|----------------|-----------|----------|----------|----------|----|
| CC | GO:00451 3/88  | 51/19717  | 0.001532 | 0.017514 | 0.014211 | 3  |
| CC | GO:00319 5/88  | 201/19717 | 0.00207  | 0.020318 | 0.016486 | 5  |
| CC | GO:19041 3/88  | 57/19717  | 0.002112 | 0.020318 | 0.016486 | 3  |
| CC | GO:00198 5/88  | 203/19717 | 0.002161 | 0.020318 | 0.016486 | 5  |
| CC | GO:00059 7/88  | 405/19717 | 0.002231 | 0.020318 | 0.016486 | 7  |
| CC | GO:00059 7/88  | 408/19717 | 0.002325 | 0.020318 | 0.016486 | 7  |
| CC | GO:00301 6/88  | 303/19717 | 0.002366 | 0.020318 | 0.016486 | 6  |
| CC | GO:00328 5/88  | 208/19717 | 0.002401 | 0.020318 | 0.016486 | 5  |
| CC | GO:00300 7/88  | 412/19717 | 0.002455 | 0.020318 | 0.016486 | 7  |
| CC | GO:00163 2/88  | 18/19717  | 0.002876 | 0.023011 | 0.018671 | 2  |
| CC | GO:00347 6/88  | 321/19717 | 0.003148 | 0.024371 | 0.019775 | 6  |
| CC | GO:00310 3/88  | 67/19717  | 0.003349 | 0.025117 | 0.02038  | 3  |
| CC | GO:00602 6/88  | 338/19717 | 0.00405  | 0.029458 | 0.023902 | 6  |
| CC | GO:00469 2/88  | 23/19717  | 0.004688 | 0.032876 | 0.026675 | 2  |
| CC | GO:00057 6/88  | 350/19717 | 0.004794 | 0.032876 | 0.026675 | 6  |
| CC | GO:00312 2/88  | 24/19717  | 0.005099 | 0.033996 | 0.027585 | 2  |
| CC | GO:00430 7/88  | 497/19717 | 0.006801 | 0.044111 | 0.035792 | 7  |
| CC | GO:19025 3/88  | 88/19717  | 0.007174 | 0.045307 | 0.036762 | 3  |
| CC | GO:00310 3/88  | 91/19717  | 0.007866 | 0.048407 | 0.039277 | 3  |
| CC | GO:00328 2/88  | 32/19717  | 0.008955 | 0.053729 | 0.043596 | 2  |
| MF | GO:00037 8/88  | 56/17697  | 3.16E-10 | 1.10E-07 | 6.78E-08 | 8  |
| MF | GO:00048 7/88  | 47/17697  | 3.16E-09 | 3.65E-07 | 2.26E-07 | 7  |
| MF | GO:00985 7/88  | 47/17697  | 3.16E-09 | 3.65E-07 | 2.26E-07 | 7  |
| MF | GO:00010 10/88 | 155/17697 | 4.99E-09 | 4.33E-07 | 2.68E-07 | 10 |
| MF | GO:00020 9/88  | 128/17697 | 1.44E-08 | 9.99E-07 | 6.18E-07 | 9  |
| MF | GO:00051 9/88  | 132/17697 | 1.89E-08 | 1.00E-06 | 6.21E-07 | 9  |
| MF | GO:00316 12/88 | 290/17697 | 2.02E-08 | 1.00E-06 | 6.21E-07 | 12 |
| MF | GO:00443 12/88 | 308/17697 | 3.93E-08 | 1.71E-06 | 1.06E-06 | 12 |
| MF | GO:00167 8/88  | 159/17697 | 1.24E-06 | 4.80E-05 | 2.97E-05 | 8  |
| MF | GO:00051 10/88 | 286/17697 | 1.54E-06 | 5.36E-05 | 3.32E-05 | 10 |
| MF | GO:00199 8/88  | 185/17697 | 3.86E-06 | 0.000122 | 7.54E-05 | 8  |
| MF | GO:00480 12/88 | 482/17697 | 4.57E-06 | 0.00013  | 8.06E-05 | 12 |
| MF | GO:00200 7/88  | 135/17697 | 4.88E-06 | 0.00013  | 8.06E-05 | 7  |
| MF | GO:00054 6/88  | 95/17697  | 7.76E-06 | 0.000181 | 0.000112 | 6  |
| MF | GO:00469 7/88  | 145/17697 | 7.82E-06 | 0.000181 | 0.000112 | 7  |
| MF | GO:00044 6/88  | 99/17697  | 9.84E-06 | 0.000213 | 0.000132 | 6  |
| MF | GO:00012 11/88 | 439/17697 | 1.11E-05 | 0.000225 | 0.000139 | 11 |
| MF | GO:00510 6/88  | 102/17697 | 1.17E-05 | 0.000225 | 0.000139 | 6  |
| MF | GO:00051 8/88  | 220/17697 | 1.37E-05 | 0.00023  | 0.000142 | 8  |
| MF | GO:00514 3/88  | 10/17697  | 1.39E-05 | 0.00023  | 0.000142 | 3  |
| MF | GO:00705 3/88  | 10/17697  | 1.39E-05 | 0.00023  | 0.000142 | 3  |
| MF | GO:00042 7/88  | 160/17697 | 1.49E-05 | 0.000235 | 0.000145 | 7  |
| MF | GO:00977 4/88  | 33/17697  | 2.09E-05 | 0.000316 | 0.000195 | 4  |
| MF | GO:00166 3/88  | 13/17697  | 3.28E-05 | 0.000474 | 0.000293 | 3  |
| MF | GO:00082 7/88  | 182/17697 | 3.41E-05 | 0.000474 | 0.000293 | 7  |
| MF | GO:00171 7/88  | 186/17697 | 3.92E-05 | 0.000523 | 0.000324 | 7  |
| MF | GO:00167 4/88  | 39/17697  | 4.11E-05 | 0.000528 | 0.000327 | 4  |
| MF | GO:00041 10/88 | 427/17697 | 5.07E-05 | 0.000619 | 0.000383 | 10 |
| MF | GO:00971 3/88  | 15/17697  | 5.18E-05 | 0.000619 | 0.000383 | 3  |
| MF | GO:00198 6/88  | 137/17697 | 6.21E-05 | 0.000718 | 0.000445 | 6  |
| MF | GO:00199 6/88  | 140/17697 | 7.01E-05 | 0.000784 | 0.000485 | 6  |
| MF | GO:00010 3/88  | 20/17697  | 0.000127 | 0.001382 | 0.000855 | 3  |
| MF | GO:00508 10/88 | 499/17697 | 0.000183 | 0.001923 | 0.00119  | 10 |
| MF | GO:00166 5/88  | 107/17697 | 0.000193 | 0.001974 | 0.001222 | 5  |
| MF | GO:00428 5/88  | 111/17697 | 0.00023  | 0.002277 | 0.001409 | 5  |
| MF | GO:00198 6/88  | 180/17697 | 0.000277 | 0.002668 | 0.001651 | 6  |
| MF | GO:00310 5/88  | 119/17697 | 0.000317 | 0.002975 | 0.001841 | 5  |
| MF | GO:00704 4/88  | 71/17697  | 0.00043  | 0.003928 | 0.002431 | 4  |

|    |               |           |          |          |          |   |
|----|---------------|-----------|----------|----------|----------|---|
| MF | GO:00167 3/88 | 32/17697  | 0.000531 | 0.004493 | 0.002781 | 3 |
| MF | GO:00302 3/88 | 32/17697  | 0.000531 | 0.004493 | 0.002781 | 3 |
| MF | GO:00517 3/88 | 32/17697  | 0.000531 | 0.004493 | 0.002781 | 3 |
| MF | GO:00192 6/88 | 207/17697 | 0.000582 | 0.004808 | 0.002975 | 6 |
| MF | GO:00055 3/88 | 34/17697  | 0.000636 | 0.005132 | 0.003176 | 3 |
| MF | GO:00511 4/88 | 80/17697  | 0.000677 | 0.005228 | 0.003235 | 4 |
| MF | GO:00011 3/88 | 35/17697  | 0.000693 | 0.005228 | 0.003235 | 3 |
| MF | GO:00015 3/88 | 35/17697  | 0.000693 | 0.005228 | 0.003235 | 3 |
| MF | GO:00198 3/88 | 36/17697  | 0.000753 | 0.005562 | 0.003442 | 3 |
| MF | GO:00512 4/88 | 83/17697  | 0.000778 | 0.005621 | 0.003479 | 4 |
| MF | GO:00336 4/88 | 85/17697  | 0.00085  | 0.006013 | 0.003721 | 4 |
| MF | GO:00083 3/88 | 38/17697  | 0.000884 | 0.006013 | 0.003721 | 3 |
| MF | GO:00162 3/88 | 38/17697  | 0.000884 | 0.006013 | 0.003721 | 3 |
| MF | GO:00717 2/88 | 10/17697  | 0.001072 | 0.007153 | 0.004427 | 2 |
| MF | GO:00518 3/88 | 41/17697  | 0.001105 | 0.007233 | 0.004476 | 3 |
| MF | GO:00452 2/88 | 11/17697  | 0.001306 | 0.008239 | 0.005099 | 2 |
| MF | GO:00526 2/88 | 11/17697  | 0.001306 | 0.008239 | 0.005099 | 2 |
| MF | GO:00328 3/88 | 46/17697  | 0.001545 | 0.009509 | 0.005885 | 3 |
| MF | GO:00048 2/88 | 12/17697  | 0.001562 | 0.009509 | 0.005885 | 2 |
| MF | GO:00040 2/88 | 13/17697  | 0.00184  | 0.010913 | 0.006754 | 2 |
| MF | GO:00080 3/88 | 49/17697  | 0.001856 | 0.010913 | 0.006754 | 3 |
| MF | GO:00047 2/88 | 14/17697  | 0.00214  | 0.012173 | 0.007533 | 2 |
| MF | GO:00360 2/88 | 14/17697  | 0.00214  | 0.012173 | 0.007533 | 2 |
| MF | GO:00154 3/88 | 52/17697  | 0.002202 | 0.012324 | 0.007627 | 3 |
| MF | GO:00514 5/88 | 185/17697 | 0.0023   | 0.012416 | 0.007684 | 5 |
| MF | GO:00011 3/88 | 53/17697  | 0.002326 | 0.012416 | 0.007684 | 3 |
| MF | GO:00050 3/88 | 53/17697  | 0.002326 | 0.012416 | 0.007684 | 3 |
| MF | GO:00090 4/88 | 114/17697 | 0.002513 | 0.013211 | 0.008176 | 4 |
| MF | GO:00314 5/88 | 193/17697 | 0.002762 | 0.014099 | 0.008725 | 5 |
| MF | GO:00051 2/88 | 16/17697  | 0.002804 | 0.014099 | 0.008725 | 2 |
| MF | GO:00101 2/88 | 16/17697  | 0.002804 | 0.014099 | 0.008725 | 2 |
| MF | GO:00055 3/88 | 59/17697  | 0.003159 | 0.015264 | 0.009446 | 3 |
| MF | GO:00971 3/88 | 59/17697  | 0.003159 | 0.015264 | 0.009446 | 3 |
| MF | GO:00051 2/88 | 17/17697  | 0.003167 | 0.015264 | 0.009446 | 2 |
| MF | GO:00431 5/88 | 205/17697 | 0.003576 | 0.016997 | 0.010519 | 5 |
| MF | GO:00047 3/88 | 62/17697  | 0.003636 | 0.017051 | 0.010552 | 3 |
| MF | GO:00048 3/88 | 63/17697  | 0.003804 | 0.017602 | 0.010893 | 3 |
| MF | GO:00332 3/88 | 64/17697  | 0.003977 | 0.01816  | 0.011238 | 3 |
| MF | GO:00020 3/88 | 66/17697  | 0.004337 | 0.019296 | 0.011941 | 3 |
| MF | GO:00423 3/88 | 66/17697  | 0.004337 | 0.019296 | 0.011941 | 3 |
| MF | GO:00192 3/88 | 67/17697  | 0.004524 | 0.019625 | 0.012145 | 3 |
| MF | GO:00303 3/88 | 67/17697  | 0.004524 | 0.019625 | 0.012145 | 3 |
| MF | GO:00611 5/88 | 219/17697 | 0.004729 | 0.020258 | 0.012537 | 5 |
| MF | GO:00081 2/88 | 21/17697  | 0.004828 | 0.02043  | 0.012643 | 2 |
| MF | GO:00037 6/88 | 319/17697 | 0.005147 | 0.021519 | 0.013317 | 6 |
| MF | GO:00010 3/88 | 72/17697  | 0.005533 | 0.02254  | 0.013949 | 3 |
| MF | GO:00010 3/88 | 72/17697  | 0.005533 | 0.02254  | 0.013949 | 3 |
| MF | GO:00012 2/88 | 23/17697  | 0.005779 | 0.02254  | 0.013949 | 2 |
| MF | GO:00441 2/88 | 23/17697  | 0.005779 | 0.02254  | 0.013949 | 2 |
| MF | GO:00704 2/88 | 23/17697  | 0.005779 | 0.02254  | 0.013949 | 2 |
| MF | GO:00162 4/88 | 144/17697 | 0.005781 | 0.02254  | 0.013949 | 4 |
| MF | GO:00016 3/88 | 74/17697  | 0.005972 | 0.022771 | 0.014092 | 3 |
| MF | GO:01040 3/88 | 74/17697  | 0.005972 | 0.022771 | 0.014092 | 3 |
| MF | GO:00352 4/88 | 152/17697 | 0.006981 | 0.026331 | 0.016295 | 4 |
| MF | GO:00191 3/88 | 79/17697  | 0.007157 | 0.026703 | 0.016525 | 3 |
| MF | GO:00040 2/88 | 26/17697  | 0.007352 | 0.026781 | 0.016573 | 2 |
| MF | GO:00302 3/88 | 80/17697  | 0.007409 | 0.026781 | 0.016573 | 3 |
| MF | GO:00463 3/88 | 80/17697  | 0.007409 | 0.026781 | 0.016573 | 3 |

|    |          |      |           |          |          |          |   |
|----|----------|------|-----------|----------|----------|----------|---|
| MF | GO:00080 | 3/88 | 82/17697  | 0.00793  | 0.028367 | 0.017555 | 3 |
| MF | GO:00162 | 3/88 | 86/17697  | 0.009034 | 0.031253 | 0.01934  | 3 |
| MF | GO:00192 | 3/88 | 86/17697  | 0.009034 | 0.031253 | 0.01934  | 3 |
| MF | GO:00350 | 2/88 | 29/17697  | 0.009097 | 0.031253 | 0.01934  | 2 |
| MF | GO:00510 | 2/88 | 29/17697  | 0.009097 | 0.031253 | 0.01934  | 2 |
| MF | GO:00303 | 2/88 | 30/17697  | 0.009715 | 0.03273  | 0.020254 | 2 |
| MF | GO:00433 | 2/88 | 30/17697  | 0.009715 | 0.03273  | 0.020254 | 2 |
| MF | GO:00051 | 2/88 | 31/17697  | 0.010352 | 0.034539 | 0.021374 | 2 |
| MF | GO:00352 | 3/88 | 92/17697  | 0.010853 | 0.035865 | 0.022195 | 3 |
| MF | GO:00048 | 6/88 | 375/17697 | 0.010987 | 0.035967 | 0.022258 | 6 |
| MF | GO:00166 | 2/88 | 35/17697  | 0.013077 | 0.042408 | 0.026244 | 2 |
| MF | GO:00082 | 2/88 | 37/17697  | 0.014544 | 0.046729 | 0.028918 | 2 |
| MF | GO:00042 | 3/88 | 103/17697 | 0.0147   | 0.046797 | 0.02896  | 3 |
| MF | GO:00165 | 2/88 | 38/17697  | 0.015303 | 0.048273 | 0.029873 | 2 |
| MF | GO:00422 | 5/88 | 295/17697 | 0.015853 | 0.049557 | 0.030668 | 5 |
| MF | GO:00017 | 2/88 | 40/17697  | 0.016871 | 0.052268 | 0.032346 | 2 |
| MF | GO:00055 | 4/88 | 200/17697 | 0.01767  | 0.054261 | 0.033579 | 4 |
| MF | GO:00303 | 2/88 | 42/17697  | 0.018504 | 0.055833 | 0.034552 | 2 |
| MF | GO:00305 | 2/88 | 42/17697  | 0.018504 | 0.055833 | 0.034552 | 2 |
| MF | GO:00012 | 2/88 | 43/17697  | 0.019344 | 0.056886 | 0.035203 | 2 |
| MF | GO:00047 | 2/88 | 43/17697  | 0.019344 | 0.056886 | 0.035203 | 2 |
| MF | GO:00169 | 2/88 | 43/17697  | 0.019344 | 0.056886 | 0.035203 | 2 |
| MF | GO:00041 | 3/88 | 116/17697 | 0.020123 | 0.058677 | 0.036312 | 3 |
| MF | GO:00991 | 3/88 | 118/17697 | 0.021042 | 0.059937 | 0.037091 | 3 |
| MF | GO:00010 | 2/88 | 45/17697  | 0.021073 | 0.059937 | 0.037091 | 2 |
| MF | GO:00481 | 2/88 | 45/17697  | 0.021073 | 0.059937 | 0.037091 | 2 |
| MF | GO:00046 | 6/88 | 439/17697 | 0.022166 | 0.062532 | 0.038697 | 6 |
| MF | GO:00165 | 2/88 | 49/17697  | 0.024715 | 0.069161 | 0.0428   | 2 |
| MF | GO:00708 | 2/88 | 50/17697  | 0.025662 | 0.071239 | 0.044085 | 2 |
| MF | GO:00453 | 2/88 | 51/17697  | 0.026625 | 0.073324 | 0.045376 | 2 |
| MF | GO:00506 | 2/88 | 52/17697  | 0.027602 | 0.075416 | 0.04667  | 2 |
| MF | GO:00047 | 3/88 | 134/17697 | 0.029219 | 0.078597 | 0.048639 | 3 |
| MF | GO:00708 | 3/88 | 134/17697 | 0.029219 | 0.078597 | 0.048639 | 3 |

#### KEGG analysis

| ID       | GeneRatio | BgRatio  | pvalue   | p.adjust | qvalue   | Count |
|----------|-----------|----------|----------|----------|----------|-------|
| hsa05417 | 29/85     | 215/8108 | 3.53E-25 | 7.83E-23 | 2.79E-23 | 29    |
| hsa05418 | 24/85     | 139/8108 | 2.01E-23 | 2.24E-21 | 7.95E-22 | 24    |
| hsa04933 | 20/85     | 100/8108 | 6.71E-21 | 4.96E-19 | 1.76E-19 | 20    |
| hsa04657 | 16/85     | 94/8108  | 1.17E-15 | 6.49E-14 | 2.31E-14 | 16    |
| hsa01522 | 16/85     | 98/8108  | 2.34E-15 | 1.04E-13 | 3.69E-14 | 16    |
| hsa05161 | 18/85     | 162/8108 | 3.79E-14 | 1.39E-12 | 4.95E-13 | 18    |
| hsa05215 | 15/85     | 97/8108  | 4.39E-14 | 1.39E-12 | 4.95E-13 | 15    |
| hsa05210 | 14/85     | 86/8108  | 1.58E-13 | 4.39E-12 | 1.56E-12 | 14    |
| hsa05160 | 17/85     | 157/8108 | 3.26E-13 | 7.14E-12 | 2.54E-12 | 17    |
| hsa05207 | 19/85     | 212/8108 | 3.55E-13 | 7.14E-12 | 2.54E-12 | 19    |
| hsa01524 | 13/85     | 73/8108  | 3.72E-13 | 7.14E-12 | 2.54E-12 | 13    |
| hsa04668 | 15/85     | 112/8108 | 3.93E-13 | 7.14E-12 | 2.54E-12 | 15    |
| hsa05222 | 14/85     | 92/8108  | 4.18E-13 | 7.14E-12 | 2.54E-12 | 14    |
| hsa05167 | 18/85     | 194/8108 | 8.90E-13 | 1.41E-11 | 5.02E-12 | 18    |
| hsa05219 | 10/85     | 41/8108  | 8.02E-12 | 1.19E-10 | 4.22E-11 | 10    |
| hsa05162 | 15/85     | 139/8108 | 9.80E-12 | 1.36E-10 | 4.84E-11 | 15    |
| hsa05163 | 17/85     | 225/8108 | 1.13E-10 | 1.47E-09 | 5.23E-10 | 17    |
| hsa04115 | 11/85     | 73/8108  | 1.82E-10 | 2.24E-09 | 7.97E-10 | 11    |
| hsa05224 | 14/85     | 147/8108 | 2.80E-10 | 3.02E-09 | 1.07E-09 | 14    |
| hsa05133 | 11/85     | 76/8108  | 2.85E-10 | 3.02E-09 | 1.07E-09 | 11    |
| hsa05212 | 11/85     | 76/8108  | 2.85E-10 | 3.02E-09 | 1.07E-09 | 11    |
| hsa05142 | 12/85     | 102/8108 | 5.00E-10 | 5.05E-09 | 1.79E-09 | 12    |

|          |       |          |          |          |          |    |
|----------|-------|----------|----------|----------|----------|----|
| hsa04932 | 14/85 | 155/8108 | 5.70E-10 | 5.50E-09 | 1.96E-09 | 14 |
| hsa04620 | 12/85 | 104/8108 | 6.29E-10 | 5.82E-09 | 2.07E-09 | 12 |
| hsa04215 | 8/85  | 32/8108  | 8.94E-10 | 7.94E-09 | 2.82E-09 | 8  |
| hsa04066 | 12/85 | 109/8108 | 1.09E-09 | 9.34E-09 | 3.32E-09 | 12 |
| hsa04210 | 13/85 | 136/8108 | 1.23E-09 | 1.01E-08 | 3.60E-09 | 13 |
| hsa04915 | 13/85 | 138/8108 | 1.48E-09 | 1.17E-08 | 4.17E-09 | 13 |
| hsa05225 | 14/85 | 168/8108 | 1.66E-09 | 1.27E-08 | 4.51E-09 | 14 |
| hsa05169 | 15/85 | 202/8108 | 2.04E-09 | 1.51E-08 | 5.37E-09 | 15 |
| hsa05205 | 15/85 | 205/8108 | 2.50E-09 | 1.79E-08 | 6.37E-09 | 15 |
| hsa05152 | 14/85 | 180/8108 | 4.09E-09 | 2.84E-08 | 1.01E-08 | 14 |
| hsa01521 | 10/85 | 79/8108  | 7.47E-09 | 5.03E-08 | 1.79E-08 | 10 |
| hsa04926 | 12/85 | 129/8108 | 7.72E-09 | 5.04E-08 | 1.79E-08 | 12 |
| hsa04151 | 18/85 | 354/8108 | 1.79E-08 | 1.14E-07 | 4.04E-08 | 18 |
| hsa05145 | 11/85 | 112/8108 | 1.93E-08 | 1.19E-07 | 4.23E-08 | 11 |
| hsa05164 | 13/85 | 172/8108 | 2.19E-08 | 1.32E-07 | 4.68E-08 | 13 |
| hsa04010 | 16/85 | 294/8108 | 4.88E-08 | 2.81E-07 | 1.00E-07 | 16 |
| hsa05223 | 9/85  | 72/8108  | 4.94E-08 | 2.81E-07 | 1.00E-07 | 9  |
| hsa04380 | 11/85 | 128/8108 | 7.81E-08 | 4.33E-07 | 1.54E-07 | 11 |
| hsa05140 | 9/85  | 77/8108  | 8.98E-08 | 4.86E-07 | 1.73E-07 | 9  |
| hsa04064 | 10/85 | 104/8108 | 1.09E-07 | 5.79E-07 | 2.06E-07 | 10 |
| hsa05213 | 8/85  | 58/8108  | 1.31E-07 | 6.75E-07 | 2.40E-07 | 8  |
| hsa05165 | 16/85 | 331/8108 | 2.51E-07 | 1.27E-06 | 4.50E-07 | 16 |
| hsa05226 | 11/85 | 149/8108 | 3.71E-07 | 1.82E-06 | 6.49E-07 | 11 |
| hsa05166 | 13/85 | 219/8108 | 3.78E-07 | 1.82E-06 | 6.49E-07 | 13 |
| hsa05323 | 9/85  | 93/8108  | 4.67E-07 | 2.21E-06 | 7.85E-07 | 9  |
| hsa04917 | 8/85  | 70/8108  | 5.82E-07 | 2.67E-06 | 9.49E-07 | 8  |
| hsa04218 | 11/85 | 156/8108 | 5.89E-07 | 2.67E-06 | 9.49E-07 | 11 |
| hsa05218 | 8/85  | 72/8108  | 7.25E-07 | 3.22E-06 | 1.14E-06 | 8  |
| hsa05144 | 7/85  | 50/8108  | 7.52E-07 | 3.27E-06 | 1.16E-06 | 7  |
| hsa05130 | 12/85 | 197/8108 | 8.43E-07 | 3.60E-06 | 1.28E-06 | 12 |
| hsa05214 | 8/85  | 75/8108  | 9.96E-07 | 4.17E-06 | 1.48E-06 | 8  |
| hsa05146 | 9/85  | 102/8108 | 1.03E-06 | 4.24E-06 | 1.51E-06 | 9  |
| hsa05220 | 8/85  | 76/8108  | 1.10E-06 | 4.46E-06 | 1.58E-06 | 8  |
| hsa05135 | 10/85 | 137/8108 | 1.45E-06 | 5.76E-06 | 2.05E-06 | 10 |
| hsa05131 | 13/85 | 247/8108 | 1.49E-06 | 5.80E-06 | 2.06E-06 | 13 |
| hsa04659 | 9/85  | 107/8108 | 1.55E-06 | 5.92E-06 | 2.10E-06 | 9  |
| hsa05132 | 13/85 | 249/8108 | 1.63E-06 | 6.13E-06 | 2.18E-06 | 13 |
| hsa04370 | 7/85  | 59/8108  | 2.38E-06 | 8.81E-06 | 3.13E-06 | 7  |
| hsa04012 | 8/85  | 85/8108  | 2.61E-06 | 9.50E-06 | 3.38E-06 | 8  |
| hsa05202 | 11/85 | 192/8108 | 4.56E-06 | 1.63E-05 | 5.81E-06 | 11 |
| hsa05171 | 12/85 | 232/8108 | 4.70E-06 | 1.66E-05 | 5.89E-06 | 12 |
| hsa04510 | 11/85 | 201/8108 | 7.09E-06 | 2.46E-05 | 8.75E-06 | 11 |
| hsa05170 | 11/85 | 212/8108 | 1.18E-05 | 3.94E-05 | 1.40E-05 | 11 |
| hsa04625 | 8/85  | 104/8108 | 1.19E-05 | 3.94E-05 | 1.40E-05 | 8  |
| hsa04660 | 8/85  | 104/8108 | 1.19E-05 | 3.94E-05 | 1.40E-05 | 8  |
| hsa04621 | 10/85 | 185/8108 | 2.13E-05 | 6.95E-05 | 2.47E-05 | 10 |
| hsa05020 | 12/85 | 273/8108 | 2.45E-05 | 7.87E-05 | 2.80E-05 | 12 |
| hsa05134 | 6/85  | 57/8108  | 2.63E-05 | 8.34E-05 | 2.96E-05 | 6  |
| hsa04722 | 8/85  | 119/8108 | 3.19E-05 | 9.97E-05 | 3.54E-05 | 8  |
| hsa05416 | 6/85  | 60/8108  | 3.54E-05 | 0.000109 | 3.88E-05 | 6  |
| hsa05235 | 7/85  | 89/8108  | 3.73E-05 | 0.000113 | 4.02E-05 | 7  |
| hsa05216 | 5/85  | 37/8108  | 3.77E-05 | 0.000113 | 4.02E-05 | 5  |
| hsa05415 | 10/85 | 203/8108 | 4.73E-05 | 0.00014  | 4.98E-05 | 10 |
| hsa05231 | 7/85  | 98/8108  | 6.94E-05 | 0.000203 | 7.21E-05 | 7  |
| hsa05206 | 12/85 | 310/8108 | 8.46E-05 | 0.000244 | 8.67E-05 | 12 |
| hsa04137 | 6/85  | 72/8108  | 9.98E-05 | 0.000284 | 0.000101 | 6  |
| hsa05022 | 15/85 | 476/8108 | 0.000108 | 0.000304 | 0.000108 | 15 |
| hsa04913 | 5/85  | 51/8108  | 0.000181 | 0.000502 | 0.000179 | 5  |

|          |       |          |          |          |          |    |
|----------|-------|----------|----------|----------|----------|----|
| hsa04071 | 7/85  | 119/8108 | 0.000236 | 0.000646 | 0.00023  | 7  |
| hsa04217 | 8/85  | 159/8108 | 0.000245 | 0.000664 | 0.000236 | 8  |
| hsa04919 | 7/85  | 121/8108 | 0.000261 | 0.000698 | 0.000248 | 7  |
| hsa05203 | 9/85  | 204/8108 | 0.000267 | 0.000705 | 0.000251 | 9  |
| hsa04068 | 7/85  | 131/8108 | 0.000424 | 0.001108 | 0.000394 | 7  |
| hsa05143 | 4/85  | 37/8108  | 0.000571 | 0.001473 | 0.000524 | 4  |
| hsa04371 | 7/85  | 138/8108 | 0.000581 | 0.001482 | 0.000527 | 7  |
| hsa04914 | 6/85  | 100/8108 | 0.000603 | 0.001522 | 0.000541 | 6  |
| hsa05211 | 5/85  | 69/8108  | 0.000747 | 0.001863 | 0.000662 | 5  |
| hsa05120 | 5/85  | 70/8108  | 0.000798 | 0.001946 | 0.000692 | 5  |
| hsa05230 | 5/85  | 70/8108  | 0.000798 | 0.001946 | 0.000692 | 5  |
| hsa04928 | 6/85  | 106/8108 | 0.000821 | 0.001981 | 0.000705 | 6  |
| hsa04931 | 6/85  | 108/8108 | 0.000906 | 0.002162 | 0.000769 | 6  |
| hsa04921 | 7/85  | 154/8108 | 0.001112 | 0.002626 | 0.000934 | 7  |
| hsa04934 | 7/85  | 155/8108 | 0.001155 | 0.002698 | 0.00096  | 7  |
| hsa04670 | 6/85  | 114/8108 | 0.001201 | 0.002777 | 0.000988 | 6  |
| hsa04630 | 7/85  | 162/8108 | 0.001492 | 0.003396 | 0.001208 | 7  |
| hsa04935 | 6/85  | 119/8108 | 0.001499 | 0.003396 | 0.001208 | 6  |
| hsa05010 | 11/85 | 369/8108 | 0.001541 | 0.003455 | 0.001229 | 11 |
| hsa04662 | 5/85  | 82/8108  | 0.00163  | 0.003619 | 0.001287 | 5  |
| hsa04110 | 6/85  | 124/8108 | 0.001851 | 0.004068 | 0.001447 | 6  |
| hsa04610 | 5/85  | 85/8108  | 0.001912 | 0.004162 | 0.00148  | 5  |
| hsa04658 | 5/85  | 92/8108  | 0.002708 | 0.005836 | 0.002076 | 5  |
| hsa04912 | 5/85  | 93/8108  | 0.002839 | 0.006059 | 0.002155 | 5  |
| hsa04014 | 8/85  | 232/8108 | 0.002877 | 0.006083 | 0.002163 | 8  |
| hsa04910 | 6/85  | 137/8108 | 0.003058 | 0.006404 | 0.002277 | 6  |
| hsa04140 | 6/85  | 141/8108 | 0.003527 | 0.007317 | 0.002602 | 6  |
| hsa00140 | 4/85  | 61/8108  | 0.003728 | 0.007663 | 0.002725 | 4  |
| hsa04062 | 7/85  | 192/8108 | 0.003891 | 0.007925 | 0.002818 | 7  |
| hsa05217 | 4/85  | 63/8108  | 0.004188 | 0.008453 | 0.003006 | 4  |
| hsa04929 | 4/85  | 64/8108  | 0.004432 | 0.008865 | 0.003152 | 4  |
| hsa05321 | 4/85  | 65/8108  | 0.004686 | 0.009288 | 0.003303 | 4  |
| hsa05221 | 4/85  | 67/8108  | 0.005222 | 0.010258 | 0.003648 | 4  |
| hsa04920 | 4/85  | 69/8108  | 0.005797 | 0.011191 | 0.00398  | 4  |
| hsa05204 | 4/85  | 69/8108  | 0.005797 | 0.011191 | 0.00398  | 4  |
| hsa04622 | 4/85  | 70/8108  | 0.0061   | 0.011674 | 0.004152 | 4  |
| hsa04024 | 7/85  | 219/8108 | 0.007905 | 0.014999 | 0.005334 | 7  |
| hsa03320 | 4/85  | 76/8108  | 0.008141 | 0.015316 | 0.005447 | 4  |
| hsa05332 | 3/85  | 42/8108  | 0.00951  | 0.017684 | 0.006289 | 3  |
| hsa04611 | 5/85  | 124/8108 | 0.009559 | 0.017684 | 0.006289 | 5  |
| hsa04940 | 3/85  | 43/8108  | 0.010147 | 0.018616 | 0.00662  | 3  |
| hsa04060 | 8/85  | 295/8108 | 0.011866 | 0.021592 | 0.007679 | 8  |
| hsa04930 | 3/85  | 46/8108  | 0.012204 | 0.022027 | 0.007833 | 3  |
| hsa05014 | 9/85  | 365/8108 | 0.013836 | 0.024771 | 0.008809 | 9  |
| hsa04211 | 4/85  | 89/8108  | 0.013988 | 0.024842 | 0.008834 | 4  |
| hsa05168 | 11/85 | 498/8108 | 0.014431 | 0.025426 | 0.009042 | 11 |
| hsa05016 | 8/85  | 306/8108 | 0.014548 | 0.025431 | 0.009044 | 8  |
| hsa05012 | 7/85  | 249/8108 | 0.015294 | 0.026526 | 0.009433 | 7  |
| hsa00330 | 3/85  | 51/8108  | 0.016129 | 0.027757 | 0.009871 | 3  |
| hsa04072 | 5/85  | 148/8108 | 0.019328 | 0.033006 | 0.011738 | 5  |
| hsa04640 | 4/85  | 99/8108  | 0.019941 | 0.033792 | 0.012017 | 4  |
| hsa04061 | 4/85  | 100/8108 | 0.02061  | 0.034662 | 0.012326 | 4  |
| hsa04923 | 3/85  | 57/8108  | 0.021671 | 0.036173 | 0.012864 | 3  |
| hsa00220 | 2/85  | 22/8108  | 0.021902 | 0.036285 | 0.012904 | 2  |
| hsa04310 | 5/85  | 166/8108 | 0.029907 | 0.048963 | 0.017412 | 5  |
| hsa00790 | 2/85  | 26/8108  | 0.029995 | 0.048963 | 0.017412 | 2  |
| hsa04725 | 4/85  | 113/8108 | 0.030576 | 0.0492   | 0.017496 | 4  |
| hsa04022 | 5/85  | 167/8108 | 0.030584 | 0.0492   | 0.017496 | 5  |

|          |      |          |          |          |          |   |
|----------|------|----------|----------|----------|----------|---|
| hsa04141 | 5/85 | 171/8108 | 0.033387 | 0.053323 | 0.018963 | 5 |
| hsa04664 | 3/85 | 68/8108  | 0.03421  | 0.054248 | 0.019291 | 3 |
| hsa04152 | 4/85 | 120/8108 | 0.036942 | 0.058164 | 0.020684 | 4 |
| hsa04020 | 6/85 | 240/8108 | 0.039716 | 0.062091 | 0.022081 | 6 |
| hsa04114 | 4/85 | 129/8108 | 0.046172 | 0.071679 | 0.025491 | 4 |
| hsa00980 | 3/85 | 78/8108  | 0.048238 | 0.073569 | 0.026162 | 3 |
| hsa04612 | 3/85 | 78/8108  | 0.048238 | 0.073569 | 0.026162 | 3 |
| hsa04650 | 4/85 | 131/8108 | 0.048383 | 0.073569 | 0.026162 | 4 |
| hsa04728 | 4/85 | 132/8108 | 0.04951  | 0.074771 | 0.02659  | 4 |
