# Supplementary material for: Identification of Bioactive Compounds and Potential Mechanisms of Kuntai Capsule in the Treatment of Polycystic Ovary Syndrome by Integrating Network Pharmacology and Bioinformatics
Source: Hindawi journal article supplement (doi:10.1155/2022/3145938), 2022-01-01
Supplement: f6 [file 3145938.f6.pdf]

AKT1-baicalein

| mode | affinity(kcal/mol) | dist from best mode (rmsd l.b.) |
|------|--------------------|---------------------------------|
| 1    | -7.3               | 0                               |
| 2    | -7.2               | 1.041                           |
| 3    | -6.8               | 2.674                           |
| 4    | -6.7               | 2.623                           |
| 5    | -6.7               | 3.115                           |
| 6    | -6.6               | 10.512                          |
| 7    | -6.4               | 24                              |
| 8    | -6.3               | 10.385                          |
| 9    | -6.3               | 1.901                           |
| 10   | -6.3               | 1.63                            |
| 11   | -6.2               | 28.275                          |
| 12   | -6.1               | 18.641                          |
| 13   | -5.7               | 25.874                          |
| 14   | -5.6               | 21.896                          |
| 15   | -5.4               | 23.252                          |
| 16   | -5.4               | 19.621                          |
| 17   | -5.3               | 25.372                          |
| 18   | -5.3               | 28.741                          |
| 19   | -5.1               | 11.59                           |
| 20   | -5.1               | 10.351                          |

AKT1-kaempferol

| mode | affinity(kcal/mol) | dist from best mode (rmsd l.b.) |
|------|--------------------|---------------------------------|
| 1    | -6.7               | 0                               |
| 2    | -6.6               | 2.876                           |
| 3    | -6.6               | 1.525                           |
| 4    | -6.5               | 3.773                           |
| 5    | -6.5               | 3.325                           |
| 6    | -6.1               | 3.394                           |
| 7    | -6.1               | 1.684                           |
| 8    | -6                 | 26.605                          |
| 9    | -6                 | 17.48                           |
| 10   | -5.9               | 22.62                           |
| 11   | -5.8               | 23.467                          |
| 12   | -5.7               | 24.194                          |
| 13   | -5.7               | 3.203                           |
| 14   | -5.6               | 26.36                           |
| 15   | -5.6               | 24.202                          |
| 16   | -5.6               | 17.49                           |
| 17   | -5.6               | 26.571                          |
| 18   | -5.6               | 22.325                          |
| 19   | -5.6               | 24.821                          |
| 20   | -5.5               | 24.2                            |

AKT1-quercetin

| mode | affinity(kcal/mol) | dist from best mode (rmsd l.b.) |
|------|--------------------|---------------------------------|
| 1    | -6.9               | 0                               |
| 2    | -6.8               | 1.536                           |
| 3    | -6.7               | 2.891                           |
| 4    | -6.5               | 2.385                           |
| 5    | -6.4               | 9.906                           |
| 6    | -6.3               | 16.784                          |
| 7    | -6.1               | 2.231                           |
| 8    | -6                 | 26.61                           |
| 9    | -6                 | 22.319                          |
| 10   | -5.9               | 22.686                          |

|    |      |        |
|----|------|--------|
| 11 | -5.9 | 2.735  |
| 12 | -5.8 | 24.921 |
| 13 | -5.7 | 21.217 |
| 14 | -5.7 | 26.72  |
| 15 | -5.7 | 18.136 |
| 16 | -5.7 | 20.703 |
| 17 | -5.6 | 24.245 |
| 18 | -5.6 | 24.174 |
| 19 | -5.4 | 18.536 |
| 20 | -5.3 | 24.419 |

AKT1-wogonin  
mode

|    | affinity(kcal/mol) | dist from best mode (rmsd l.b.) |
|----|--------------------|---------------------------------|
| 1  | -7.3               | 0                               |
| 2  | -6.8               | 2.057                           |
| 3  | -6.7               | 1.268                           |
| 4  | -6.6               | 2.676                           |
| 5  | -6.1               | 10.281                          |
| 6  | -5.9               | 26.089                          |
| 7  | -5.9               | 20.786                          |
| 8  | -5.9               | 18.168                          |
| 9  | -5.8               | 28.225                          |
| 10 | -5.8               | 28.708                          |
| 11 | -5.4               | 20.425                          |
| 12 | -5.4               | 25.571                          |
| 13 | -5.3               | 23.052                          |
| 14 | -5.3               | 28.654                          |
| 15 | -5.2               | 19.216                          |
| 16 | -5.2               | 24.422                          |
| 17 | -5.2               | 18.987                          |
| 18 | -5.1               | 25.42                           |
| 19 | -5.1               | 25.322                          |
| 20 | -5.1               | 18.642                          |

JUN-beta-sitostero  
mode

|    | affinity(kcal/mol) | dist from best mode (rmsd l.b.) |
|----|--------------------|---------------------------------|
| 1  | -6.9               | 0                               |
| 2  | -6.8               | 2.188                           |
| 3  | -6.8               | 15.638                          |
| 4  | -6.7               | 13.929                          |
| 5  | -6.6               | 13.927                          |
| 6  | -6.5               | 3.488                           |
| 7  | -6.5               | 13.397                          |
| 8  | -6.3               | 14.011                          |
| 9  | -6.3               | 13.563                          |
| 10 | -6.2               | 5.598                           |
| 11 | -6.1               | 13.846                          |
| 12 | -6.1               | 13.568                          |
| 13 | -5.9               | 13.694                          |
| 14 | -5.9               | 15.252                          |
| 15 | -5.8               | 6.48                            |
| 16 | -5.7               | 14.968                          |
| 17 | -5.6               | 14.286                          |
| 18 | -5.6               | 35.943                          |
| 19 | -5.5               | 7.896                           |
| 20 | -5.4               | 4.75                            |

JUN-kaempferol

| mode | affinity(kcal/mol) | dist from best mode (rmsd l.b.) |
|------|--------------------|---------------------------------|
| 1    | -8.1               | 0                               |
| 2    | -8                 | 13.267                          |
| 3    | -7.9               | 23.7                            |
| 4    | -7.9               | 24.012                          |
| 5    | -7.8               | 10.793                          |
| 6    | -7.8               | 24.424                          |
| 7    | -7.7               | 5.769                           |
| 8    | -7.7               | 27.715                          |
| 9    | -7.6               | 25.357                          |
| 10   | -7.5               | 8.045                           |
| 11   | -7.5               | 18.545                          |
| 12   | -7.4               | 29.246                          |
| 13   | -7.4               | 14.139                          |
| 14   | -7.4               | 26.102                          |
| 15   | -7.3               | 21.982                          |
| 16   | -7.3               | 5.955                           |
| 17   | -7.2               | 1.561                           |
| 18   | -7.2               | 1.616                           |
| 19   | -7.2               | 26.649                          |
| 20   | -7.2               | 14.816                          |

JUN-quercetin

| mode | affinity(kcal/mol) | dist from best mode (rmsd l.b.) |
|------|--------------------|---------------------------------|
| 1    | -8.6               | 0                               |
| 2    | -8.5               | 23.601                          |
| 3    | -8.5               | 25.423                          |
| 4    | -8.3               | 10.894                          |
| 5    | -8.2               | 23.974                          |
| 6    | -8.1               | 25.671                          |
| 7    | -8                 | 5.92                            |
| 8    | -8                 | 1.669                           |
| 9    | -8                 | 5.743                           |
| 10   | -7.9               | 24.435                          |
| 11   | -7.9               | 29.058                          |
| 12   | -7.7               | 26.353                          |
| 13   | -7.7               | 30.953                          |
| 14   | -7.6               | 1.799                           |
| 15   | -7.6               | 1.8                             |
| 16   | -7.5               | 4.397                           |
| 17   | -7.5               | 2.399                           |
| 18   | -7.5               | 3.849                           |
| 19   | -7.4               | 1.728                           |
| 20   | -7.2               | 10.996                          |

JUN-wogonin

| mode | affinity(kcal/mol) | dist from best mode (rmsd l.b.) |
|------|--------------------|---------------------------------|
| 1    | -7.5               | 0                               |
| 2    | -7.2               | 14.141                          |
| 3    | -7.1               | 13.969                          |
| 4    | -6.9               | 28.399                          |
| 5    | -6.9               | 31.786                          |
| 6    | -6.9               | 13.666                          |
| 7    | -6.8               | 13.679                          |
| 8    | -6.7               | 13.449                          |
| 9    | -6.6               | 32.281                          |
| 10   | -6.5               | 13.844                          |
| 11   | -6.5               | 33.369                          |

|    |      |        |
|----|------|--------|
| 12 | -6.5 | 14.037 |
| 13 | -6.4 | 31.305 |
| 14 | -6.4 | 14.276 |
| 15 | -6.2 | 13.833 |
| 16 | -6.2 | 9.722  |
| 17 | -6.1 | 13.06  |
| 18 | -5.9 | 14.376 |
| 19 | -5.8 | 14.969 |
| 20 | -5.7 | 9.697  |

MAPK1-quercetin

| mode | affinity(kcal/mol) | dist from best mode (rmsd l.b.) |
|------|--------------------|---------------------------------|
| 1    | -8.7               | 0                               |
| 2    | -8.5               | 20.693                          |
| 3    | -8.5               | 17.348                          |
| 4    | -8.3               | 27.892                          |
| 5    | -8.3               | 1.504                           |
| 6    | -8.2               | 4.042                           |
| 7    | -8.1               | 3.448                           |
| 8    | -8                 | 21.13                           |
| 9    | -8                 | 25.074                          |
| 10   | -8                 | 21.405                          |
| 11   | -7.9               | 24.65                           |
| 12   | -7.9               | 19.37                           |
| 13   | -7.8               | 28.246                          |
| 14   | -7.7               | 19.288                          |
| 15   | -7.6               | 23.782                          |
| 16   | -7.4               | 22.866                          |
| 17   | -7.4               | 4.48                            |
| 18   | -7.3               | 28.042                          |
| 19   | -7.2               | 22.611                          |
| 20   | -7.1               | 28.406                          |

MAPK8-kaempferol

| mode | affinity(kcal/mol) | dist from best mode (rmsd l.b.) |
|------|--------------------|---------------------------------|
| 1    | -8.7               | 0                               |
| 2    | -8.5               | 39.353                          |
| 3    | -8.4               | 36.843                          |
| 4    | -8.3               | 51.938                          |
| 5    | -8.3               | 59.526                          |
| 6    | -8.1               | 59.906                          |
| 7    | -8                 | 60.521                          |
| 8    | -8                 | 65.102                          |
| 9    | -7.9               | 20.735                          |
| 10   | -7.8               | 60.368                          |
| 11   | -7.8               | 63.855                          |
| 12   | -7.8               | 21.387                          |
| 13   | -7.6               | 65.348                          |
| 14   | -7.6               | 32.16                           |
| 15   | -7.5               | 60.262                          |
| 16   | -7.5               | 65.551                          |
| 17   | -7.4               | 53.465                          |
| 18   | -7.4               | 51.454                          |
| 19   | -7.4               | 21.232                          |
| 20   | -7.3               | 21.193                          |

TP53-acacetin

| mode | affinity(kcal/mol) | dist from best mode (rmsd l.b.) |
|------|--------------------|---------------------------------|
|------|--------------------|---------------------------------|

|    |      |         |
|----|------|---------|
| 1  | -8.6 | 0       |
| 2  | -8.3 | 3.093   |
| 3  | -8.2 | 33.399  |
| 4  | -8.2 | 59.862  |
| 5  | -8.2 | 60.809  |
| 6  | -8   | 51.92   |
| 7  | -7.9 | 3.976   |
| 8  | -7.7 | 99.405  |
| 9  | -7.6 | 2.01    |
| 10 | -7.5 | 17.693  |
| 11 | -7.5 | 100.592 |
| 12 | -7.3 | 64.589  |
| 13 | -7.3 | 48.659  |
| 14 | -7.3 | 54.169  |
| 15 | -7.2 | 18.23   |
| 16 | -7.2 | 95.197  |
| 17 | -7.1 | 60.215  |
| 18 | -7   | 41.456  |
| 19 | -6.9 | 2.152   |
| 20 | -6.9 | 22.353  |

TP53-baicalein  
mode

|    | affinity(kcal/mol) | dist from best mode (rmsd l.b.) |
|----|--------------------|---------------------------------|
| 1  | -8.5               | 0                               |
| 2  | -8.5               | 70.024                          |
| 3  | -8.4               | 33.178                          |
| 4  | -8.2               | 23.665                          |
| 5  | -8.2               | 74.457                          |
| 6  | -8.1               | 52.113                          |
| 7  | -8                 | 70.282                          |
| 8  | -7.9               | 70.553                          |
| 9  | -7.9               | 51.947                          |
| 10 | -7.9               | 74.52                           |
| 11 | -7.9               | 75.991                          |
| 12 | -7.8               | 74.032                          |
| 13 | -7.7               | 55.672                          |
| 14 | -7.7               | 23.307                          |
| 15 | -7.6               | 59.773                          |
| 16 | -7.5               | 57.265                          |
| 17 | -7.5               | 50.658                          |
| 18 | -7.4               | 49.578                          |
| 19 | -7.3               | 31.57                           |
| 20 | -7.3               | 30.853                          |

TP53-queracetin  
mode

|    | affinity(kcal/mol) | dist from best mode (rmsd l.b.) |
|----|--------------------|---------------------------------|
| 1  | -8.9               | 0                               |
| 2  | -8.5               | 74.875                          |
| 3  | -8.4               | 113.018                         |
| 4  | -8.3               | 3.173                           |
| 5  | -8                 | 26.093                          |
| 6  | -8                 | 25.546                          |
| 7  | -8                 | 75.845                          |
| 8  | -8                 | 110.861                         |
| 9  | -8                 | 25.102                          |
| 10 | -8                 | 51.699                          |
| 11 | -7.9               | 50.184                          |
| 12 | -7.9               | 113.803                         |

|    |      |         |
|----|------|---------|
| 13 | -7.9 | 3.773   |
| 14 | -7.8 | 108.292 |
| 15 | -7.5 | 103.603 |
| 16 | -7.4 | 50.964  |
| 17 | -7.3 | 24.537  |
| 18 | -7.3 | 22.349  |
| 19 | -7.2 | 103.073 |
| 20 | -7.1 | 104.204 |

TP53-wogonin

| mode |      | affinity(kcal/mol) | dist from best mode (rmsd l.b.) |
|------|------|--------------------|---------------------------------|
| 1    | -8.8 | 0.000              | 0.000                           |
| 2    | -8.4 | 33.622             | 36.969                          |
| 3    | -7.8 | 29.434             | 32.483                          |
| 4    | -7.7 | 21.954             | 25.289                          |
| 5    | -7.6 | 32.867             | 34.065                          |
| 6    | -7.6 | 22.487             | 25.179                          |
| 7    | -7.4 | 1.594              | 1.889                           |
| 8    | -7.3 | 81.258             | 84.607                          |
| 9    | -7.3 | 22.939             | 25.711                          |
| 10   | -7.3 | 80.945             | 84.244                          |
| 11   | -7.2 | 32.048             | 35.004                          |
| 12   | -7.2 | 24.870             | 26.223                          |
| 13   | -7.2 | 6.008              | 9.455                           |
| 14   | -7.2 | 24.798             | 25.808                          |
| 15   | -7.2 | 72.797             | 75.730                          |
| 16   | -7.1 | 31.872             | 34.353                          |
| 17   | -7.0 | 7.893              | 11.267                          |
| 18   | -6.8 | 22.496             | 24.781                          |
| 19   | -6.6 | 12.148             | 14.275                          |
| 20   | -6.5 | 32.303             | 34.805                          |

dist from best mode ( rmsd u.b.)

0  
2.622  
4.553  
4.452  
4.198  
10.768  
25.493  
10.897  
2.815  
3.304  
30.614  
20.326  
27.221  
23.24  
25.071  
22.629  
26.303  
31.031  
11.833  
10.833

dist from best mode ( rmsd u.b.)

0  
6.529  
3.297  
6.439  
6.788  
6.886  
6.471  
27.955  
18.97  
24.574  
24.87  
26.382  
6.881  
27.522  
25.834  
19.107  
28.196  
24.373  
26.184  
26.834

dist from best mode ( rmsd u.b.)

0  
2.983  
6.903  
6.646  
12.783  
18.767  
2.982  
28.658  
24.454  
24.732

6.576  
26.465  
23.553  
28.42  
20.024  
23.151  
26.354  
25.841  
20.525  
26.861

dist from best mode ( rmsd u.b.)

0  
4.86  
3.393  
4.759  
11.328  
27.227  
23.063  
19.869  
30.672  
30.378  
22.745  
26.66  
25.443  
29.684  
20.523  
26.824  
21.163  
25.924  
27.023  
19.977

dist from best mode ( rmsd u.b.)

0  
4.495  
17.334  
17.629  
16.81  
6.707  
15.26  
17.562  
16.578  
10.05  
18.163  
15.494  
16.077  
19.151  
13.358  
16.937  
16.849  
39.051  
14.256  
8.158



dist from best mode ( rmsd u.b.)

0  
16.578  
25.729  
26.03  
14.941  
25.542  
11.072  
29.316  
27.163  
11.934  
21.761  
31.938  
16.033  
28.295  
24.755  
10.788  
3.24  
6.335  
27.949  
17.781

dist from best mode ( rmsd u.b.)

0  
25.601  
27.441  
14.954  
26.046  
28.031  
10.95  
2.001  
9.449  
25.597  
31.743  
27.74  
34.243  
6.699  
3.691  
9.43  
4.724  
7.032  
6.435  
15.432

dist from best mode ( rmsd u.b.)

0  
16.543  
15.854  
31.034  
34.681  
15.786  
16.118  
15.386  
35.157  
16.291  
36.212

16.62  
32.68  
16.552  
16.087  
12.816  
14.769  
16.162  
16.913  
13.191

dist from best mode ( rmsd u.b.)

0  
21.618  
22.12  
29.259  
6.483  
6.98  
6.447  
22.199  
26.323  
22.46  
25.449  
23.955  
30.045  
24.409  
24.842  
23.878  
6.913  
29.88  
23.572  
29.444

dist from best mode ( rmsd u.b.)

0  
41.583  
38.936  
54.608  
61.524  
61.782  
62.517  
66.364  
22.697  
62.187  
65.951  
22.323  
66.997  
33.772  
62.259  
67.564  
54.961  
54.524  
22.97  
22.155

dist from best mode ( rmsd u.b.)

0  
4.257  
37.293  
61.431  
62.846  
53.394  
6.03  
101.278  
2.539  
19.782  
102.862  
66.348  
50.506  
56.122  
21.218  
96.06  
61.644  
43.484  
8.854  
23.107

dist from best mode ( rmsd u.b.)

0  
71.809  
35.04  
25.776  
75.845  
53.344  
70.568  
71.618  
53.465  
76.635  
78.142  
76.562  
57.681  
25.54  
61.797  
59.194  
52.757  
51.602  
33.69  
33.821

dist from best mode ( rmsd u.b.)

0  
76.793  
116.243  
6.417  
27.443  
27.171  
76.544  
113.5  
26.691  
53.228  
52.061  
117.842

6.412  
111.952  
107.706  
52.781  
27.216  
26.224  
106.84  
107.765

dist from best mode ( rmsd u.b.)
