# Supplementary material for: Identification of Bioactive Compounds and Potential Mechanisms of Kuntai Capsule in the Treatment of Polycystic Ovary Syndrome by Integrating Network Pharmacology and Bioinformatics
Source: Hindawi journal article supplement (doi:10.1155/2022/3145938), 2022-01-01
Supplement: f7 [file 3145938.f7.pdf]

| Number | Active ingredients                                                                                                                                                     | Number of intersections with 88 potential therapeutic targets | Intersection with 88 potential therapeutic targets                 |
|--------|------------------------------------------------------------------------------------------------------------------------------------------------------------------------|---------------------------------------------------------------|--------------------------------------------------------------------|
| 1      | (+)-catechin                                                                                                                                                           | 5                                                             | ESR1 , PTGS2 , HSP90AA1, NPPB, HAS2                                |
| 2      | (2R)-2-[(3S,5R,10S,13R,14R,16R,17R)-3,16-dihydroxy-4,4,10,13,14-pentamethyl-2,3,5,6,12,15,16,17-octahydro-1H-cyclopenta[a]phenanthren-17-yl]-6-methylhept-5-enoic acid | 1                                                             | NR3C2                                                              |
| 3      | (2R)-7-hydroxy-5-methoxy-2-phenylchroman-4-one                                                                                                                         | 4                                                             | ESR1 , PTGS2 , ADRB2, HSP90AA1                                     |
| 4      | (3S,5R,8R,9R,10S,14S)-3,17-dihydroxy-4,4,8,10,14-pentamethyl-2,3,5,6,7,9-hexahydro-1H-cyclopenta[a]phenanthrene-15,16-dione                                            | 2                                                             | PGR, NR3C2                                                         |
| 5      | (R)-Canadine                                                                                                                                                           | 4                                                             | PTGS2 , ADRB2 , HSP90AA1, SLC6A2                                   |
| 6      | 11,13-Eicosadienoic acid, methyl ester                                                                                                                                 | 0                                                             |                                                                    |
| 7      | 5,2',6'-Trihydroxy-7,8-dimethoxyflavone                                                                                                                                | 8                                                             | NOS2, AR, PTGS2, TOP2A , ESR2 , DPP4, HSP90AA1, CDK2               |
| 8      | 5,2'-Dihydroxy-6,7,8-trimethoxyflavone                                                                                                                                 | 10                                                            | NOS2 , F2, AR , PTGS2 , TOP2A , ESR2 , DPP4 , PPARD, HSP90AA1, KDR |
| 9      | 5,7,2,5-tetrahydroxy-8,6-dimethoxyflavone                                                                                                                              | 7                                                             | NOS2 , F2, AR , PTGS2 , TOP2A , DPP4, HSP90AA1                     |
| 10     | 5,7,2',6'-Tetrahydroxyflavone                                                                                                                                          | 4                                                             | AR, PTGS2, DPP4, HSP90AA1                                          |
| 11     | 5,7,4'-trihydroxy-6-methoxyflavanone                                                                                                                                   | 2                                                             | PTGS2, HSP90AA1                                                    |

|    |                                                  |    |                                                                                              |
|----|--------------------------------------------------|----|----------------------------------------------------------------------------------------------|
| 12 | 5,7,4'-trihydroxy-8-methoxyflavanone             | 2  | PTGS2, HSP90AA1                                                                              |
| 13 | 5,7,4'-Trihydroxy-8-methoxyflavone               | 9  | NOS2, ESR1, AR, PPARG, PTGS2, DPP4, GSK3B, HSP90AA1, CDK2                                    |
| 14 | acacetin                                         | 14 | NOS2, AR, PTGS2, DPP4, HSP90AA1, CDK2, ADRB2, BCL2, CDKN1A, BAX, CASP3, TP53, CASP8, CYP19A1 |
| 15 | baicalein                                        | 15 | AR, PTGS2, HSP90AA1, DPP4, AKT1, NPPB, BCL2, FOS, BAX, MMP9, CASP3, TP53, HIF1A, FOSL2, IGF2 |
| 16 | berberine                                        | 6  | NOS2, ESR1, AR, PTGS2, ADRB2, HSP90AA1                                                       |
| 17 | berberrubine                                     | 4  | NOS2, ESR1, AR, PTGS2                                                                        |
| 18 | Berlambine                                       | 5  | NOS2, AR, PTGS2, ADRB2, HSP90AA1                                                             |
| 19 | beta-sitosterol                                  | 11 | PGR, PTGS2, HSP90AA1, ADRB2, BCL2, BAX, CASP9, JUN, CASP3, CASP8, PON1                       |
| 20 | bis[(2S)-2-ethylhexyl] benzene-1,2-dicarboxylate | 0  |                                                                                              |
| 21 | Carthamidin                                      | 2  | PTGS2, HSP90AA1                                                                              |
| 22 | Cerevisterol                                     | 1  | NR3C2                                                                                        |
| 23 | coptisine                                        | 4  | NOS2, ESR1, AR, PTGS2                                                                        |
| 24 | Corchoroside A_qt                                | 1  | NR3C2                                                                                        |
| 25 | Dihydrobaicalin_qt                               | 2  | PTGS2, HSP90AA1                                                                              |
| 26 | DIHYDROOROXYLIN                                  | 3  | PTGS2, ADRB2, HSP90AA1                                                                       |
| 27 | Diop                                             | 1  | ADRB2                                                                                        |
| 28 | ent-Epicatechin                                  | 3  | ESR1, PTGS2,                                                                                 |

|    |                             |    |                                                                                                                                                                                        |
|----|-----------------------------|----|----------------------------------------------------------------------------------------------------------------------------------------------------------------------------------------|
|    |                             |    | HSP90AA1                                                                                                                                                                               |
| 29 | epiberberine                | 4  | NOS2, ESR1, AR, PTGS2                                                                                                                                                                  |
| 30 | ergosta-7,22E-dien-3beta-ol | 1  | PGR                                                                                                                                                                                    |
| 31 | Ergosterol peroxide         | 1  | PGR                                                                                                                                                                                    |
| 32 | Eriodyctiol (flavanone)     | 2  | PTGS2, HSP90AA1                                                                                                                                                                        |
| 33 | hederagenin                 | 4  | PGR, NPPB, PTGS2, SLC6A2                                                                                                                                                               |
| 34 | kaempferol                  | 28 | NOS2, AR, PPARG, PTGS2, HSP90AA1, DPP4, PGR, F2, SLC6A2, TOP2A, AKT1, BCL2, BAX, JUN, CASP3, MAPK8, MMP1, HMOX1, NPPB, CYP1A1, ICAM1, VCAM1, CYP1B1, HAS2, SLC2A4, GSTM1, AKR1C3, SLPI |
| 35 | Magnograndiolide            | 0  |                                                                                                                                                                                        |
| 36 | Mairin                      | 1  | PGR                                                                                                                                                                                    |
| 37 | Moslosooflavone             | 11 | NOS2, F2, AR, PPARG, PTGS2, ESR2, DPP4, GSK3B, HSP90AA1, CDK2, ADRB2                                                                                                                   |
| 38 | NEOBAICALEIN                | 11 | NOS2, F2, ESR1, AR, PPARG, PTGS2, TOP2A, ESR2, DPP4, GSK3B, HSP90AA1                                                                                                                   |
| 39 | Norwogonin                  | 7  | NOS2, AR, PPARG, PTGS2, DPP4, HSP90AA1, CDK2                                                                                                                                           |
| 40 | roxylin a                   | 10 | NOS2, AR, PTGS2, ADRB2, DPP4, HSP90AA1, BCL2, IL6R, CASP3, NPPB                                                                                                                        |
| 41 | paeoniflorin                | 3  | IL6R, CD14, LBP                                                                                                                                                                        |
| 42 | palmatine                   | 8  | NOS2, ESR1, AR, PTGS2, ADRB2, ESR2, HSP90AA1,                                                                                                                                          |

|    |            |    |                                                                                                                                                                                                                                                                                                                                                                                                                                                                                                                                  |
|----|------------|----|----------------------------------------------------------------------------------------------------------------------------------------------------------------------------------------------------------------------------------------------------------------------------------------------------------------------------------------------------------------------------------------------------------------------------------------------------------------------------------------------------------------------------------|
|    |            |    | CDK2                                                                                                                                                                                                                                                                                                                                                                                                                                                                                                                             |
| 43 | Panicolin  | 7  | NOS2, AR, PTGS2, ESR2 , DPP4 , HSP90AA1, CDK2                                                                                                                                                                                                                                                                                                                                                                                                                                                                                    |
| 44 | quercetin  | 71 | AR , PTGS2 , HSP90AA1, DPP4, AKR1B1 , F2 , ADRB2 , EGFR , AKT1 , NPPB , BCL2 , BCL2L1 , FOS , CDKN1A , BAX , CASP9 , MMP2 , MMP9 , MAPK1, RB1, JUN, IL6R, CASP3, TP53, ODC1 , CASP8 , SOD1 , MMP1 , HIF1A , HSPA5 , PPARG, ACACA, HMOX1, CAV1, F3, CYP1A1, ICAM1, IL1B , CCL2 , VCAM1, CXCL8, BIRC5 , NOS3 , HSPB1, CYP1B1, PLAT , THBD , SERPINE1, IFNG, IL1A , TOP2A , NCF1 , HAS2 , NQO1 , SLC2A4 , COL3A1, CLDN4, PPARA , PPARD , CXCL10 , SPP1 , RUNX2 , E2F1 , IGFBP3 , IGF2 , CD40LG , IRF1 , ERBB3 , PON1 , RASA1, GSTM1 |
| 45 | rivularin  | 9  | NOS2 , F2, AR, PTGS2 , KDR , TOP2A , ESR2 , DPP4, HSP90AA1                                                                                                                                                                                                                                                                                                                                                                                                                                                                       |
| 46 | Salvigenin | 6  | NOS2, F2, PTGS2, ADRB2 , DPP4 ,                                                                                                                                                                                                                                                                                                                                                                                                                                                                                                  |

|    |                    |    |                                                                                                                                                       |
|----|--------------------|----|-------------------------------------------------------------------------------------------------------------------------------------------------------|
|    |                    |    | HSP90AA1                                                                                                                                              |
| 47 | sitosterol         | 2  | PGR, NR3C2                                                                                                                                            |
| 48 | Skullcapflavone II | 8  | NOS2, F2, AR, PTGS2, KDR, TOP2A, DPP4, HSP90AA1                                                                                                       |
| 49 | Stigmasterol       | 7  | PGR, NR3C2, NPPB, PTGS2, SLC6A2, ADRB2, AKR1B1                                                                                                        |
| 50 | trametenolic acid  | 1  | NR3C2                                                                                                                                                 |
| 51 | wogonin            | 24 | NOS2, ESR1, AR, PPARG, PTGS2, DPP4, GSK3B, HSP90AA1, CDK2, ADRB2, AKT1, BCL2, CDKN1A, BAX, CASP9, KDR, JUN, IL6R, CASP3, TP53, MMP1, CCL2, FN1, CXCL8 |
| 52 | Worenine           | 4  | NOS2, ESR1, AR, PTGS2                                                                                                                                 |
