# Supplementary material for: Identification of Bioactive Compounds and Potential Mechanisms of Kuntai Capsule in the Treatment of Polycystic Ovary Syndrome by Integrating Network Pharmacology and Bioinformatics
Source: Hindawi journal article supplement (doi:10.1155/2022/3145938), 2022-01-01
Supplement: f8 [file 3145938.f8.pdf]

## PPI network

| node1 | node2    | node1_string        | node2_string    | id |
|-------|----------|---------------------|-----------------|----|
| ADRB2 | IL1B     | 9606. ENSP000(9606. | ENSP00000263341 |    |
| ADRB2 | EGFR     | 9606. ENSP000(9606. | ENSP00000275493 |    |
| ADRB2 | F2       | 9606. ENSP000(9606. | ENSP00000308541 |    |
| AKT1  | MAPK1    | 9606. ENSP000(9606. | ENSP00000215832 |    |
| AKT1  | HMOX1    | 9606. ENSP000(9606. | ENSP00000216117 |    |
| AKT1  | MMP2     | 9606. ENSP000(9606. | ENSP00000219070 |    |
| AKT1  | SERPINE1 | 9606. ENSP000(9606. | ENSP00000223095 |    |
| AKT1  | CCL2     | 9606. ENSP000(9606. | ENSP00000225831 |    |
| AKT1  | HSPB1    | 9606. ENSP000(9606. | ENSP00000248553 |    |
| AKT1  | ICAM1    | 9606. ENSP000(9606. | ENSP00000264832 |    |
| AKT1  | ERBB3    | 9606. ENSP000(9606. | ENSP00000267101 |    |
| AKT1  | RB1      | 9606. ENSP000(9606. | ENSP00000267163 |    |
| AKT1  | TP53     | 9606. ENSP000(9606. | ENSP00000269305 |    |
| AKT1  | SOD1     | 9606. ENSP000(9606. | ENSP00000270142 |    |
| AKT1  | NCF1     | 9606. ENSP000(9606. | ENSP00000289473 |    |
| AKT1  | BAX      | 9606. ENSP000(9606. | ENSP00000293288 |    |
| AKT1  | VCAM1    | 9606. ENSP000(9606. | ENSP00000294728 |    |
| AKT1  | NOS3     | 9606. ENSP000(9606. | ENSP00000297494 |    |
| AKT1  | BCL2L1   | 9606. ENSP000(9606. | ENSP00000302564 |    |
| AKT1  | FOS      | 9606. ENSP000(9606. | ENSP00000306245 |    |
| AKT1  | CXCL8    | 9606. ENSP000(9606. | ENSP00000306512 |    |
| AKT1  | CASP3    | 9606. ENSP000(9606. | ENSP00000311032 |    |
| AKT1  | SLC2A4   | 9606. ENSP000(9606. | ENSP00000320935 |    |
| AKT1  | HSPA5    | 9606. ENSP000(9606. | ENSP00000324173 |    |
| AKT1  | CASP9    | 9606. ENSP000(9606. | ENSP00000330237 |    |
| AKT1  | HSP90AA1 | 9606. ENSP000(9606. | ENSP00000335153 |    |
| AKT1  | CAV1     | 9606. ENSP000(9606. | ENSP00000339191 |    |
| AKT1  | E2F1     | 9606. ENSP000(9606. | ENSP00000345571 |    |
| AKT1  | CASP8    | 9606. ENSP000(9606. | ENSP00000351273 |    |
| AKT1  | PTGS2    | 9606. ENSP000(9606. | ENSP00000356438 |    |
| AKT1  | CD40LG   | 9606. ENSP000(9606. | ENSP00000359663 |    |
| AKT1  | JUN      | 9606. ENSP000(9606. | ENSP00000360266 |    |
| AKT1  | RUNX2    | 9606. ENSP000(9606. | ENSP00000360493 |    |
| AKT1  | MMP9     | 9606. ENSP000(9606. | ENSP00000361405 |    |
| AKT1  | AR       | 9606. ENSP000(9606. | ENSP00000363822 |    |
| AKT1  | IGFBP3   | 9606. ENSP000(9606. | ENSP00000370473 |    |
| AKT1  | SPP1     | 9606. ENSP000(9606. | ENSP00000378517 |    |
| AKT1  | BCL2     | 9606. ENSP000(9606. | ENSP00000381185 |    |
| AKT1  | CDKN1A   | 9606. ENSP000(9606. | ENSP00000384849 |    |
| AKT1  | IGF2     | 9606. ENSP000(9606. | ENSP00000391826 |    |
| AKT1  | HIF1A    | 9606. ENSP000(9606. | ENSP00000437955 |    |
| AR    | MAPK1    | 9606. ENSP000(9606. | ENSP00000215832 |    |
| AR    | ERBB3    | 9606. ENSP000(9606. | ENSP00000267101 |    |
| AR    | RB1      | 9606. ENSP000(9606. | ENSP00000267163 |    |
| AR    | TP53     | 9606. ENSP000(9606. | ENSP00000269305 |    |
| AR    | EGFR     | 9606. ENSP000(9606. | ENSP00000275493 |    |
| AR    | BCL2L1   | 9606. ENSP000(9606. | ENSP00000302564 |    |
| AR    | CASP3    | 9606. ENSP000(9606. | ENSP00000311032 |    |
| AR    | HSP90AA1 | 9606. ENSP000(9606. | ENSP00000335153 |    |
| AR    | CAV1     | 9606. ENSP000(9606. | ENSP00000339191 |    |
| AR    | CASP8    | 9606. ENSP000(9606. | ENSP00000351273 |    |
| AR    | JUN      | 9606. ENSP000(9606. | ENSP00000360266 |    |
| AR    | RUNX2    | 9606. ENSP000(9606. | ENSP00000360493 |    |
| AR    | MMP9     | 9606. ENSP000(9606. | ENSP00000361405 |    |
| BAX   | TP53     | 9606. ENSP000(9606. | ENSP00000269305 |    |
| BAX   | CASP8    | 9606. ENSP000(9606. | ENSP00000351273 |    |
| BAX   | CASP9    | 9606. ENSP000(9606. | ENSP00000330237 |    |
| BAX   | CASP3    | 9606. ENSP000(9606. | ENSP00000311032 |    |
| BAX   | BCL2     | 9606. ENSP000(9606. | ENSP00000381185 |    |
| BAX   | BCL2L1   | 9606. ENSP000(9606. | ENSP00000302564 |    |
| BCL2  | MAPK1    | 9606. ENSP000(9606. | ENSP00000215832 |    |

|        |          |                                    |
|--------|----------|------------------------------------|
| BCL2   | TP53     | 9606. ENSP00(9606. ENSP00000269305 |
| BCL2   | SOD1     | 9606. ENSP00(9606. ENSP00000270142 |
| BCL2   | BCL2L1   | 9606. ENSP00(9606. ENSP00000302564 |
| BCL2   | CASP3    | 9606. ENSP00(9606. ENSP00000311032 |
| BCL2   | CASP8    | 9606. ENSP00(9606. ENSP00000351273 |
| BCL2L1 | MAPK1    | 9606. ENSP00(9606. ENSP00000215832 |
| BCL2L1 | TP53     | 9606. ENSP00(9606. ENSP00000269305 |
| BCL2L1 | CXCL8    | 9606. ENSP00(9606. ENSP00000306512 |
| BCL2L1 | CASP3    | 9606. ENSP00(9606. ENSP00000311032 |
| BCL2L1 | CASP9    | 9606. ENSP00(9606. ENSP00000330237 |
| BCL2L1 | CASP8    | 9606. ENSP00(9606. ENSP00000351273 |
| BIRC5  | TP53     | 9606. ENSP00(9606. ENSP00000269305 |
| BIRC5  | RASA1    | 9606. ENSP00(9606. ENSP00000274376 |
| BIRC5  | CASP3    | 9606. ENSP00(9606. ENSP00000311032 |
| BIRC5  | CASP9    | 9606. ENSP00(9606. ENSP00000330237 |
| BIRC5  | TOP2A    | 9606. ENSP00(9606. ENSP00000411532 |
| CASP3  | MAPK1    | 9606. ENSP00(9606. ENSP00000215832 |
| CASP3  | HMOX1    | 9606. ENSP00(9606. ENSP00000216117 |
| CASP3  | HSPB1    | 9606. ENSP00(9606. ENSP00000248553 |
| CASP3  | IL1B     | 9606. ENSP00(9606. ENSP00000263341 |
| CASP3  | RB1      | 9606. ENSP00(9606. ENSP00000267163 |
| CASP3  | TP53     | 9606. ENSP00(9606. ENSP00000269305 |
| CASP3  | EGFR     | 9606. ENSP00(9606. ENSP00000275493 |
| CASP3  | NOS3     | 9606. ENSP00(9606. ENSP00000297494 |
| CASP3  | MMP9     | 9606. ENSP00(9606. ENSP00000361405 |
| CASP3  | HSPA5    | 9606. ENSP00(9606. ENSP00000324173 |
| CASP3  | JUN      | 9606. ENSP00(9606. ENSP00000360266 |
| CASP3  | CASP9    | 9606. ENSP00(9606. ENSP00000330237 |
| CASP3  | CDKN1A   | 9606. ENSP00(9606. ENSP00000384849 |
| CASP3  | CASP8    | 9606. ENSP00(9606. ENSP00000351273 |
| CASP8  | MAPK1    | 9606. ENSP00(9606. ENSP00000215832 |
| CASP8  | IL1B     | 9606. ENSP00(9606. ENSP00000263341 |
| CASP8  | TP53     | 9606. ENSP00(9606. ENSP00000269305 |
| CASP8  | EGFR     | 9606. ENSP00(9606. ENSP00000275493 |
| CASP8  | COL3A1   | 9606. ENSP00(9606. ENSP00000304408 |
| CASP8  | HSPA5    | 9606. ENSP00(9606. ENSP00000324173 |
| CASP8  | CASP9    | 9606. ENSP00(9606. ENSP00000330237 |
| CASP8  | HSP90AA1 | 9606. ENSP00(9606. ENSP00000335153 |
| CASP9  | MAPK1    | 9606. ENSP00(9606. ENSP00000215832 |
| CASP9  | TP53     | 9606. ENSP00(9606. ENSP00000269305 |
| CASP9  | JUN      | 9606. ENSP00(9606. ENSP00000360266 |
| CAV1   | TP53     | 9606. ENSP00(9606. ENSP00000269305 |
| CAV1   | EGFR     | 9606. ENSP00(9606. ENSP00000275493 |
| CAV1   | PPARG    | 9606. ENSP00(9606. ENSP00000287820 |
| CAV1   | NOS3     | 9606. ENSP00(9606. ENSP00000297494 |
| CAV1   | HSP90AA1 | 9606. ENSP00(9606. ENSP00000335153 |
| CAV1   | PTGS2    | 9606. ENSP00(9606. ENSP00000356438 |
| CCL2   | MAPK1    | 9606. ENSP00(9606. ENSP00000215832 |
| CCL2   | HMOX1    | 9606. ENSP00(9606. ENSP00000216117 |
| CCL2   | MMP2     | 9606. ENSP00(9606. ENSP00000219070 |
| CCL2   | SERPINE1 | 9606. ENSP00(9606. ENSP00000223095 |
| CCL2   | IL1A     | 9606. ENSP00(9606. ENSP00000263339 |
| CCL2   | IL6R     | 9606. ENSP00(9606. ENSP00000357470 |
| CCL2   | TP53     | 9606. ENSP00(9606. ENSP00000269305 |
| CCL2   | F3       | 9606. ENSP00(9606. ENSP00000334145 |
| CCL2   | CD40LG   | 9606. ENSP00(9606. ENSP00000359663 |
| CCL2   | IFNG     | 9606. ENSP00(9606. ENSP00000229135 |
| CCL2   | SPP1     | 9606. ENSP00(9606. ENSP00000378517 |
| CCL2   | MMP9     | 9606. ENSP00(9606. ENSP00000361405 |
| CCL2   | PTGS2    | 9606. ENSP00(9606. ENSP00000356438 |
| CCL2   | MMP1     | 9606. ENSP00(9606. ENSP00000322788 |
| CCL2   | ICAM1    | 9606. ENSP00(9606. ENSP00000264832 |
| CCL2   | VCAM1    | 9606. ENSP00(9606. ENSP00000294728 |

|        |          |                                    |
|--------|----------|------------------------------------|
| CCL2   | CXCL10   | 9606. ENSP00(9606. ENSP00000305651 |
| CCL2   | IL1B     | 9606. ENSP00(9606. ENSP00000263341 |
| CCL2   | FOS      | 9606. ENSP00(9606. ENSP00000306245 |
| CCL2   | JUN      | 9606. ENSP00(9606. ENSP00000360266 |
| CCL2   | CXCL8    | 9606. ENSP00(9606. ENSP00000306512 |
| CD40LG | IFNG     | 9606. ENSP00(9606. ENSP00000229135 |
| CD40LG | ICAM1    | 9606. ENSP00(9606. ENSP00000264832 |
| CD40LG | VCAM1    | 9606. ENSP00(9606. ENSP00000294728 |
| CDKN1A | RB1      | 9606. ENSP00(9606. ENSP00000267163 |
| CDKN1A | TP53     | 9606. ENSP00(9606. ENSP00000269305 |
| CDKN1A | HSP90AA1 | 9606. ENSP00(9606. ENSP00000335153 |
| CDKN1A | E2F1     | 9606. ENSP00(9606. ENSP00000345571 |
| CDKN1A | JUN      | 9606. ENSP00(9606. ENSP00000360266 |
| CDKN1A | HIF1A    | 9606. ENSP00(9606. ENSP00000437955 |
| COL3A1 | MMP2     | 9606. ENSP00(9606. ENSP00000219070 |
| CXCL10 | IFNG     | 9606. ENSP00(9606. ENSP00000229135 |
| CXCL10 | IRF1     | 9606. ENSP00(9606. ENSP00000245414 |
| CXCL10 | IL1B     | 9606. ENSP00(9606. ENSP00000263341 |
| CXCL10 | ICAM1    | 9606. ENSP00(9606. ENSP00000264832 |
| CXCL10 | MMP9     | 9606. ENSP00(9606. ENSP00000361405 |
| CXCL10 | CXCL8    | 9606. ENSP00(9606. ENSP00000306512 |
| CXCL8  | MAPK1    | 9606. ENSP00(9606. ENSP00000215832 |
| CXCL8  | HMOX1    | 9606. ENSP00(9606. ENSP00000216117 |
| CXCL8  | MMP2     | 9606. ENSP00(9606. ENSP00000219070 |
| CXCL8  | SERPINE1 | 9606. ENSP00(9606. ENSP00000223095 |
| CXCL8  | IFNG     | 9606. ENSP00(9606. ENSP00000229135 |
| CXCL8  | IL1A     | 9606. ENSP00(9606. ENSP00000263339 |
| CXCL8  | IL1B     | 9606. ENSP00(9606. ENSP00000263341 |
| CXCL8  | ICAM1    | 9606. ENSP00(9606. ENSP00000264832 |
| CXCL8  | EGFR     | 9606. ENSP00(9606. ENSP00000275493 |
| CXCL8  | VCAM1    | 9606. ENSP00(9606. ENSP00000294728 |
| CXCL8  | FOS      | 9606. ENSP00(9606. ENSP00000306245 |
| CXCL8  | MMP1     | 9606. ENSP00(9606. ENSP00000322788 |
| CXCL8  | MMP9     | 9606. ENSP00(9606. ENSP00000361405 |
| CXCL8  | PTGS2    | 9606. ENSP00(9606. ENSP00000356438 |
| CXCL8  | JUN      | 9606. ENSP00(9606. ENSP00000360266 |
| CYP1A1 | TP53     | 9606. ENSP00(9606. ENSP00000269305 |
| CYP1A1 | GSTM1    | 9606. ENSP00(9606. ENSP00000311469 |
| CYP1A1 | NQO1     | 9606. ENSP00(9606. ENSP00000319788 |
| CYP1A1 | CYP1B1   | 9606. ENSP00(9606. ENSP00000478561 |
| CYP1A1 | PPARA    | 9606. ENSP00(9606. ENSP00000385523 |
| CYP1B1 | GSTM1    | 9606. ENSP00(9606. ENSP00000311469 |
| CYP1B1 | NQO1     | 9606. ENSP00(9606. ENSP00000319788 |
| E2F1   | RB1      | 9606. ENSP00(9606. ENSP00000267163 |
| E2F1   | TP53     | 9606. ENSP00(9606. ENSP00000269305 |
| E2F1   | PPARG    | 9606. ENSP00(9606. ENSP00000287820 |
| EGFR   | MAPK1    | 9606. ENSP00(9606. ENSP00000215832 |
| EGFR   | SERPINE1 | 9606. ENSP00(9606. ENSP00000223095 |
| EGFR   | IFNG     | 9606. ENSP00(9606. ENSP00000229135 |
| EGFR   | HSPB1    | 9606. ENSP00(9606. ENSP00000248553 |
| EGFR   | ERBB3    | 9606. ENSP00(9606. ENSP00000267101 |
| EGFR   | TP53     | 9606. ENSP00(9606. ENSP00000269305 |
| EGFR   | RASA1    | 9606. ENSP00(9606. ENSP00000274376 |
| EGFR   | PPARG    | 9606. ENSP00(9606. ENSP00000287820 |
| EGFR   | MMP9     | 9606. ENSP00(9606. ENSP00000361405 |
| EGFR   | IGF2     | 9606. ENSP00(9606. ENSP00000391826 |
| EGFR   | IGFBP3   | 9606. ENSP00(9606. ENSP00000370473 |
| EGFR   | PTGS2    | 9606. ENSP00(9606. ENSP00000356438 |
| EGFR   | JUN      | 9606. ENSP00(9606. ENSP00000360266 |
| EGFR   | FOS      | 9606. ENSP00(9606. ENSP00000306245 |
| EGFR   | HIF1A    | 9606. ENSP00(9606. ENSP00000437955 |
| EGFR   | HSP90AA1 | 9606. ENSP00(9606. ENSP00000335153 |
| ERBB3  | IGF2     | 9606. ENSP00(9606. ENSP00000391826 |

|          |          |                                    |
|----------|----------|------------------------------------|
| ERBB3    | HSP90AA1 | 9606. ENSP00(9606. ENSP00000335153 |
| F2       | MAPK1    | 9606. ENSP00(9606. ENSP00000215832 |
| F2       | PLAT     | 9606. ENSP00(9606. ENSP00000220809 |
| F2       | SERPINE1 | 9606. ENSP00(9606. ENSP00000223095 |
| F2       | SPP1     | 9606. ENSP00(9606. ENSP00000378517 |
| F2       | PPARA    | 9606. ENSP00(9606. ENSP00000385523 |
| F2       | IGF2     | 9606. ENSP00(9606. ENSP00000391826 |
| F2       | IGFBP3   | 9606. ENSP00(9606. ENSP00000370473 |
| F2       | F3       | 9606. ENSP00(9606. ENSP00000334145 |
| F2       | THBD     | 9606. ENSP00(9606. ENSP00000366307 |
| F3       | PLAT     | 9606. ENSP00(9606. ENSP00000220809 |
| F3       | SERPINE1 | 9606. ENSP00(9606. ENSP00000223095 |
| F3       | THBD     | 9606. ENSP00(9606. ENSP00000366307 |
| FOS      | MAPK1    | 9606. ENSP00(9606. ENSP00000215832 |
| FOS      | HMOX1    | 9606. ENSP00(9606. ENSP00000216117 |
| FOS      | IL1A     | 9606. ENSP00(9606. ENSP00000263339 |
| FOS      | IL1B     | 9606. ENSP00(9606. ENSP00000263341 |
| FOS      | TP53     | 9606. ENSP00(9606. ENSP00000269305 |
| FOS      | PPARG    | 9606. ENSP00(9606. ENSP00000287820 |
| FOS      | PTGS2    | 9606. ENSP00(9606. ENSP00000356438 |
| FOS      | MMP1     | 9606. ENSP00(9606. ENSP00000322788 |
| FOS      | JUN      | 9606. ENSP00(9606. ENSP00000360266 |
| GSTM1    | NQO1     | 9606. ENSP00(9606. ENSP00000319788 |
| HIF1A    | MAPK1    | 9606. ENSP00(9606. ENSP00000215832 |
| HIF1A    | HMOX1    | 9606. ENSP00(9606. ENSP00000216117 |
| HIF1A    | MMP2     | 9606. ENSP00(9606. ENSP00000219070 |
| HIF1A    | TP53     | 9606. ENSP00(9606. ENSP00000269305 |
| HIF1A    | NOS3     | 9606. ENSP00(9606. ENSP00000297494 |
| HIF1A    | HSP90AA1 | 9606. ENSP00(9606. ENSP00000335153 |
| HIF1A    | JUN      | 9606. ENSP00(9606. ENSP00000360266 |
| HMOX1    | MAPK1    | 9606. ENSP00(9606. ENSP00000215832 |
| HMOX1    | SOD1     | 9606. ENSP00(9606. ENSP00000270142 |
| HMOX1    | PPARG    | 9606. ENSP00(9606. ENSP00000287820 |
| HMOX1    | MMP9     | 9606. ENSP00(9606. ENSP00000361405 |
| HMOX1    | TP53     | 9606. ENSP00(9606. ENSP00000269305 |
| HMOX1    | IL1B     | 9606. ENSP00(9606. ENSP00000263341 |
| HMOX1    | PTGS2    | 9606. ENSP00(9606. ENSP00000356438 |
| HMOX1    | NOS3     | 9606. ENSP00(9606. ENSP00000297494 |
| HMOX1    | NQO1     | 9606. ENSP00(9606. ENSP00000319788 |
| HMOX1    | JUN      | 9606. ENSP00(9606. ENSP00000360266 |
| HSP90AA1 | MAPK1    | 9606. ENSP00(9606. ENSP00000215832 |
| HSP90AA1 | MMP2     | 9606. ENSP00(9606. ENSP00000219070 |
| HSP90AA1 | IFNG     | 9606. ENSP00(9606. ENSP00000229135 |
| HSP90AA1 | IRF1     | 9606. ENSP00(9606. ENSP00000245414 |
| HSP90AA1 | HSPB1    | 9606. ENSP00(9606. ENSP00000248553 |
| HSP90AA1 | RB1      | 9606. ENSP00(9606. ENSP00000267163 |
| HSP90AA1 | TP53     | 9606. ENSP00(9606. ENSP00000269305 |
| HSP90AA1 | SOD1     | 9606. ENSP00(9606. ENSP00000270142 |
| HSP90AA1 | NOS3     | 9606. ENSP00(9606. ENSP00000297494 |
| HSP90AA1 | HSPA5    | 9606. ENSP00(9606. ENSP00000324173 |
| HSP90AA1 | PPARA    | 9606. ENSP00(9606. ENSP00000385523 |
| HSPA5    | HSPB1    | 9606. ENSP00(9606. ENSP00000248553 |
| HSPB1    | MAPK1    | 9606. ENSP00(9606. ENSP00000215832 |
| HSPB1    | TP53     | 9606. ENSP00(9606. ENSP00000269305 |
| ICAM1    | MAPK1    | 9606. ENSP00(9606. ENSP00000215832 |
| ICAM1    | MMP2     | 9606. ENSP00(9606. ENSP00000219070 |
| ICAM1    | IFNG     | 9606. ENSP00(9606. ENSP00000229135 |
| ICAM1    | IRF1     | 9606. ENSP00(9606. ENSP00000245414 |
| ICAM1    | IL1A     | 9606. ENSP00(9606. ENSP00000263339 |
| ICAM1    | IL1B     | 9606. ENSP00(9606. ENSP00000263341 |
| ICAM1    | NOS3     | 9606. ENSP00(9606. ENSP00000297494 |
| ICAM1    | PTGS2    | 9606. ENSP00(9606. ENSP00000356438 |
| ICAM1    | PPARG    | 9606. ENSP00(9606. ENSP00000287820 |

|        |          |                                    |
|--------|----------|------------------------------------|
| ICAM1  | SPP1     | 9606. ENSP00(9606. ENSP00000378517 |
| ICAM1  | TP53     | 9606. ENSP00(9606. ENSP00000269305 |
| ICAM1  | MMP9     | 9606. ENSP00(9606. ENSP00000361405 |
| ICAM1  | JUN      | 9606. ENSP00(9606. ENSP00000360266 |
| ICAM1  | VCAM1    | 9606. ENSP00(9606. ENSP00000294728 |
| IFNG   | IL1A     | 9606. ENSP00(9606. ENSP00000263339 |
| IFNG   | MMP9     | 9606. ENSP00(9606. ENSP00000361405 |
| IFNG   | IL6R     | 9606. ENSP00(9606. ENSP00000357470 |
| IFNG   | IL1B     | 9606. ENSP00(9606. ENSP00000263341 |
| IFNG   | JUN      | 9606. ENSP00(9606. ENSP00000360266 |
| IFNG   | IRF1     | 9606. ENSP00(9606. ENSP00000245414 |
| IGF2   | MMP2     | 9606. ENSP00(9606. ENSP00000219070 |
| IGF2   | SERPINE1 | 9606. ENSP00(9606. ENSP00000223095 |
| IGF2   | TP53     | 9606. ENSP00(9606. ENSP00000269305 |
| IGF2   | MMP1     | 9606. ENSP00(9606. ENSP00000322788 |
| IGF2   | IGFBP3   | 9606. ENSP00(9606. ENSP00000370473 |
| IGFBP3 | MMP2     | 9606. ENSP00(9606. ENSP00000219070 |
| IGFBP3 | TP53     | 9606. ENSP00(9606. ENSP00000269305 |
| IGFBP3 | PPARG    | 9606. ENSP00(9606. ENSP00000287820 |
| IGFBP3 | MMP1     | 9606. ENSP00(9606. ENSP00000322788 |
| IGFBP3 | SPP1     | 9606. ENSP00(9606. ENSP00000378517 |
| IL1A   | VCAM1    | 9606. ENSP00(9606. ENSP00000294728 |
| IL1A   | MMP1     | 9606. ENSP00(9606. ENSP00000322788 |
| IL1A   | PTGS2    | 9606. ENSP00(9606. ENSP00000356438 |
| IL1A   | JUN      | 9606. ENSP00(9606. ENSP00000360266 |
| IL1A   | IL1B     | 9606. ENSP00(9606. ENSP00000263341 |
| IL1B   | MAPK1    | 9606. ENSP00(9606. ENSP00000215832 |
| IL1B   | MMP2     | 9606. ENSP00(9606. ENSP00000219070 |
| IL1B   | IRF1     | 9606. ENSP00(9606. ENSP00000245414 |
| IL1B   | SPP1     | 9606. ENSP00(9606. ENSP00000378517 |
| IL1B   | NOS3     | 9606. ENSP00(9606. ENSP00000297494 |
| IL1B   | PPARG    | 9606. ENSP00(9606. ENSP00000287820 |
| IL1B   | MMP1     | 9606. ENSP00(9606. ENSP00000322788 |
| IL1B   | VCAM1    | 9606. ENSP00(9606. ENSP00000294728 |
| IL1B   | MMP9     | 9606. ENSP00(9606. ENSP00000361405 |
| IL1B   | JUN      | 9606. ENSP00(9606. ENSP00000360266 |
| IL1B   | PTGS2    | 9606. ENSP00(9606. ENSP00000356438 |
| IL6R   | MAPK1    | 9606. ENSP00(9606. ENSP00000215832 |
| IRF1   | TP53     | 9606. ENSP00(9606. ENSP00000269305 |
| IRF1   | JUN      | 9606. ENSP00(9606. ENSP00000360266 |
| IRF1   | VCAM1    | 9606. ENSP00(9606. ENSP00000294728 |
| JUN    | MAPK1    | 9606. ENSP00(9606. ENSP00000215832 |
| JUN    | RBI      | 9606. ENSP00(9606. ENSP00000267163 |
| JUN    | TP53     | 9606. ENSP00(9606. ENSP00000269305 |
| JUN    | PPARG    | 9606. ENSP00(9606. ENSP00000287820 |
| JUN    | NOS3     | 9606. ENSP00(9606. ENSP00000297494 |
| JUN    | MMP1     | 9606. ENSP00(9606. ENSP00000322788 |
| JUN    | PTGS2    | 9606. ENSP00(9606. ENSP00000356438 |
| JUN    | MMP9     | 9606. ENSP00(9606. ENSP00000361405 |
| JUN    | PPARA    | 9606. ENSP00(9606. ENSP00000385523 |
| MAPK1  | NCF1     | 9606. ENSP00(9606. ENSP00000289473 |
| MAPK1  | MMP1     | 9606. ENSP00(9606. ENSP00000322788 |
| MAPK1  | NOS3     | 9606. ENSP00(9606. ENSP00000297494 |
| MAPK1  | MMP2     | 9606. ENSP00(9606. ENSP00000219070 |
| MAPK1  | PTGS2    | 9606. ENSP00(9606. ENSP00000356438 |
| MAPK1  | MMP9     | 9606. ENSP00(9606. ENSP00000361405 |
| MAPK1  | RASA1    | 9606. ENSP00(9606. ENSP00000274376 |
| MAPK1  | PPARA    | 9606. ENSP00(9606. ENSP00000385523 |
| MAPK1  | RBI      | 9606. ENSP00(9606. ENSP00000267163 |
| MAPK1  | RUNX2    | 9606. ENSP00(9606. ENSP00000360493 |
| MAPK1  | TP53     | 9606. ENSP00(9606. ENSP00000269305 |
| MMP1   | MMP2     | 9606. ENSP00(9606. ENSP00000219070 |
| MMP1   | TP53     | 9606. ENSP00(9606. ENSP00000269305 |

|          |          |                                    |
|----------|----------|------------------------------------|
| MMP1     | MMP9     | 9606. ENSP00(9606. ENSP00000361405 |
| MMP2     | PTGS2    | 9606. ENSP00(9606. ENSP00000356438 |
| MMP2     | SERPINE1 | 9606. ENSP00(9606. ENSP00000223095 |
| MMP2     | SPP1     | 9606. ENSP00(9606. ENSP00000378517 |
| MMP2     | TP53     | 9606. ENSP00(9606. ENSP00000269305 |
| MMP2     | NCF1     | 9606. ENSP00(9606. ENSP00000289473 |
| MMP2     | MMP9     | 9606. ENSP00(9606. ENSP00000361405 |
| MMP9     | PLAT     | 9606. ENSP00(9606. ENSP00000220809 |
| MMP9     | SERPINE1 | 9606. ENSP00(9606. ENSP00000223095 |
| MMP9     | TP53     | 9606. ENSP00(9606. ENSP00000269305 |
| MMP9     | PPARG    | 9606. ENSP00(9606. ENSP00000287820 |
| MMP9     | NCF1     | 9606. ENSP00(9606. ENSP00000289473 |
| MMP9     | NOS3     | 9606. ENSP00(9606. ENSP00000297494 |
| MMP9     | PTGS2    | 9606. ENSP00(9606. ENSP00000356438 |
| MMP9     | RUNX2    | 9606. ENSP00(9606. ENSP00000360493 |
| MMP9     | SPP1     | 9606. ENSP00(9606. ENSP00000378517 |
| NCF1     | VCAM1    | 9606. ENSP00(9606. ENSP00000294728 |
| NOS3     | TP53     | 9606. ENSP00(9606. ENSP00000269305 |
| NOS3     | PPARG    | 9606. ENSP00(9606. ENSP00000287820 |
| NOS3     | VCAM1    | 9606. ENSP00(9606. ENSP00000294728 |
| NOS3     | PTGS2    | 9606. ENSP00(9606. ENSP00000356438 |
| NQO1     | ODC1     | 9606. ENSP00(9606. ENSP00000234111 |
| NQO1     | TP53     | 9606. ENSP00(9606. ENSP00000269305 |
| PLAT     | THBD     | 9606. ENSP00(9606. ENSP00000366307 |
| PLAT     | SERPINE1 | 9606. ENSP00(9606. ENSP00000223095 |
| PPARA    | RB1      | 9606. ENSP00(9606. ENSP00000267163 |
| PPARG    | SERPINE1 | 9606. ENSP00(9606. ENSP00000223095 |
| PPARG    | RB1      | 9606. ENSP00(9606. ENSP00000267163 |
| PPARG    | TP53     | 9606. ENSP00(9606. ENSP00000269305 |
| PPARG    | RUNX2    | 9606. ENSP00(9606. ENSP00000360493 |
| PPARG    | PTGS2    | 9606. ENSP00(9606. ENSP00000356438 |
| PPARG    | SLC2A4   | 9606. ENSP00(9606. ENSP00000320935 |
| PTGS2    | TP53     | 9606. ENSP00(9606. ENSP00000269305 |
| PTGS2    | VCAM1    | 9606. ENSP00(9606. ENSP00000294728 |
| RB1      | RUNX2    | 9606. ENSP00(9606. ENSP00000360493 |
| RB1      | TP53     | 9606. ENSP00(9606. ENSP00000269305 |
| RUNX2    | TP53     | 9606. ENSP00(9606. ENSP00000269305 |
| RUNX2    | SPP1     | 9606. ENSP00(9606. ENSP00000378517 |
| SERPINE1 | THBD     | 9606. ENSP00(9606. ENSP00000366307 |
| SERPINE1 | TP53     | 9606. ENSP00(9606. ENSP00000269305 |
| SPP1     | TP53     | 9606. ENSP00(9606. ENSP00000269305 |
| TOP2A    | TP53     | 9606. ENSP00(9606. ENSP00000269305 |

GO analysis

| ONTOLOGY | ID         | GeneRatio | BgRatio   | pvalue   | p. adjust | qvalue   | Count |
|----------|------------|-----------|-----------|----------|-----------|----------|-------|
| BP       | GO:0010038 | 22/71     | 364/18670 | 6.63E-21 | 2.22E-17  | 9.95E-18 | 22    |
| BP       | GO:0070997 | 21/71     | 348/18670 | 6.14E-20 | 1.03E-16  | 4.61E-17 | 21    |
| BP       | GO:0097191 | 18/71     | 224/18670 | 2.36E-19 | 2.64E-16  | 1.18E-16 | 18    |
| BP       | GO:0031667 | 23/71     | 499/18670 | 3.23E-19 | 2.71E-16  | 1.21E-16 | 23    |
| BP       | GO:0072593 | 19/71     | 284/18670 | 6.74E-19 | 4.52E-16  | 2.03E-16 | 19    |
| BP       | GO:2001233 | 21/71     | 406/18670 | 1.47E-18 | 8.22E-16  | 3.68E-16 | 21    |
| BP       | GO:1901214 | 19/71     | 313/18670 | 4.19E-18 | 2.01E-15  | 9.00E-16 | 19    |
| BP       | GO:2001234 | 17/71     | 230/18670 | 1.10E-17 | 4.20E-15  | 1.88E-15 | 17    |
| BP       | GO:0032496 | 19/71     | 330/18670 | 1.13E-17 | 4.20E-15  | 1.88E-15 | 19    |
| BP       | GO:0070482 | 20/71     | 394/18670 | 1.60E-17 | 5.37E-15  | 2.40E-15 | 20    |
| BP       | GO:0002237 | 19/71     | 343/18670 | 2.31E-17 | 7.05E-15  | 3.16E-15 | 19    |
| BP       | GO:0044706 | 16/71     | 222/18670 | 1.67E-16 | 4.65E-14  | 2.08E-14 | 16    |
| BP       | GO:0071496 | 18/71     | 339/18670 | 3.81E-16 | 9.83E-14  | 4.40E-14 | 18    |
| BP       | GO:0007565 | 15/71     | 192/18670 | 4.84E-16 | 1.13E-13  | 5.05E-14 | 15    |
| BP       | GO:0097193 | 17/71     | 289/18670 | 5.14E-16 | 1.13E-13  | 5.05E-14 | 17    |
| BP       | GO:0051402 | 16/71     | 239/18670 | 5.38E-16 | 1.13E-13  | 5.05E-14 | 16    |
| BP       | GO:2000377 | 15/71     | 195/18670 | 6.11E-16 | 1.21E-13  | 5.40E-14 | 15    |

|    |            |       |           |          |          |          |    |
|----|------------|-------|-----------|----------|----------|----------|----|
| BP | GO:0001666 | 18/71 | 359/18670 | 1.04E-15 | 1.89E-13 | 8.45E-14 | 18 |
| BP | GO:0034599 | 17/71 | 302/18670 | 1.07E-15 | 1.89E-13 | 8.45E-14 | 17 |
| BP | GO:0048608 | 19/71 | 431/18670 | 1.55E-15 | 2.61E-13 | 1.17E-13 | 19 |
| BP | GO:0036293 | 18/71 | 370/18670 | 1.76E-15 | 2.69E-13 | 1.20E-13 | 18 |
| BP | GO:0061458 | 19/71 | 434/18670 | 1.76E-15 | 2.69E-13 | 1.20E-13 | 19 |
| BP | GO:0048660 | 14/71 | 169/18670 | 2.21E-15 | 3.23E-13 | 1.45E-13 | 14 |
| BP | GO:0048659 | 14/71 | 171/18670 | 2.61E-15 | 3.65E-13 | 1.63E-13 | 14 |
| BP | GO:0009314 | 19/71 | 448/18670 | 3.14E-15 | 4.22E-13 | 1.89E-13 | 19 |
| BP | GO:0006979 | 19/71 | 451/18670 | 3.55E-15 | 4.58E-13 | 2.05E-13 | 19 |
| BP | GO:0046677 | 17/71 | 327/18670 | 4.00E-15 | 4.96E-13 | 2.22E-13 | 17 |
| BP | GO:0042110 | 19/71 | 464/18670 | 5.94E-15 | 7.12E-13 | 3.19E-13 | 19 |
| BP | GO:0000302 | 15/71 | 232/18670 | 8.15E-15 | 9.43E-13 | 4.22E-13 | 15 |
| BP | GO:0071276 | 9/71  | 37/18670  | 1.12E-14 | 1.26E-12 | 5.63E-13 | 9  |
| BP | GO:0033002 | 15/71 | 239/18670 | 1.27E-14 | 1.37E-12 | 6.13E-13 | 15 |
| BP | GO:1901654 | 14/71 | 193/18670 | 1.42E-14 | 1.49E-12 | 6.68E-13 | 14 |
| BP | GO:0009266 | 15/71 | 243/18670 | 1.62E-14 | 1.64E-12 | 7.36E-13 | 15 |
| BP | GO:1903409 | 12/71 | 122/18670 | 3.23E-14 | 3.18E-12 | 1.43E-12 | 12 |
| BP | GO:0043523 | 14/71 | 210/18670 | 4.60E-14 | 4.40E-12 | 1.97E-12 | 14 |
| BP | GO:2000379 | 11/71 | 102/18670 | 1.45E-13 | 1.35E-11 | 6.06E-12 | 11 |
| BP | GO:2001237 | 11/71 | 104/18670 | 1.81E-13 | 1.64E-11 | 7.34E-12 | 11 |
| BP | GO:0071248 | 13/71 | 190/18670 | 2.88E-13 | 2.52E-11 | 1.13E-11 | 13 |
| BP | GO:0006809 | 10/71 | 77/18670  | 2.93E-13 | 2.52E-11 | 1.13E-11 | 10 |
| BP | GO:1903037 | 15/71 | 304/18670 | 4.28E-13 | 3.59E-11 | 1.61E-11 | 15 |
| BP | GO:0046209 | 10/71 | 82/18670  | 5.63E-13 | 4.61E-11 | 2.06E-11 | 10 |
| BP | GO:2001236 | 12/71 | 155/18670 | 5.85E-13 | 4.67E-11 | 2.09E-11 | 12 |
| BP | GO:2001057 | 10/71 | 85/18670  | 8.17E-13 | 6.37E-11 | 2.85E-11 | 10 |
| BP | GO:0048545 | 16/71 | 385/18670 | 8.94E-13 | 6.81E-11 | 3.05E-11 | 16 |
| BP | GO:0007568 | 15/71 | 321/18670 | 9.40E-13 | 7.00E-11 | 3.14E-11 | 15 |
| BP | GO:0062012 | 17/71 | 459/18670 | 9.98E-13 | 7.27E-11 | 3.26E-11 | 17 |
| BP | GO:0071214 | 15/71 | 331/18670 | 1.46E-12 | 1.02E-10 | 4.58E-11 | 15 |
| BP | GO:0104004 | 15/71 | 331/18670 | 1.46E-12 | 1.02E-10 | 4.58E-11 | 15 |
| BP | GO:0034614 | 12/71 | 168/18670 | 1.53E-12 | 1.05E-10 | 4.70E-11 | 12 |
| BP | GO:0071241 | 13/71 | 217/18670 | 1.58E-12 | 1.06E-10 | 4.75E-11 | 13 |
| BP | GO:0007159 | 15/71 | 337/18670 | 1.89E-12 | 1.24E-10 | 5.58E-11 | 15 |
| BP | GO:0046686 | 9/71  | 63/18670  | 1.98E-12 | 1.28E-10 | 5.71E-11 | 9  |
| BP | GO:0048871 | 17/71 | 485/18670 | 2.41E-12 | 1.52E-10 | 6.82E-11 | 17 |
| BP | GO:0050673 | 16/71 | 434/18670 | 5.49E-12 | 3.41E-10 | 1.53E-10 | 16 |
| BP | GO:0035296 | 11/71 | 143/18670 | 6.24E-12 | 3.67E-10 | 1.64E-10 | 11 |
| BP | GO:0050880 | 11/71 | 143/18670 | 6.24E-12 | 3.67E-10 | 1.64E-10 | 11 |
| BP | GO:0097746 | 11/71 | 143/18670 | 6.24E-12 | 3.67E-10 | 1.64E-10 | 11 |
| BP | GO:0035150 | 11/71 | 144/18670 | 6.73E-12 | 3.87E-10 | 1.73E-10 | 11 |
| BP | GO:0038034 | 9/71  | 72/18670  | 6.92E-12 | 3.87E-10 | 1.73E-10 | 9  |
| BP | GO:0097192 | 9/71  | 72/18670  | 6.92E-12 | 3.87E-10 | 1.73E-10 | 9  |
| BP | GO:0042136 | 10/71 | 106/18670 | 7.81E-12 | 4.29E-10 | 1.92E-10 | 10 |
| BP | GO:0051098 | 15/71 | 373/18670 | 8.07E-12 | 4.37E-10 | 1.96E-10 | 15 |
| BP | GO:0010212 | 11/71 | 147/18670 | 8.44E-12 | 4.49E-10 | 2.01E-10 | 11 |
| BP | GO:0001890 | 11/71 | 152/18670 | 1.22E-11 | 6.38E-10 | 2.86E-10 | 11 |
| BP | GO:1901215 | 12/71 | 208/18670 | 1.91E-11 | 9.87E-10 | 4.42E-10 | 12 |
| BP | GO:0031668 | 13/71 | 268/18670 | 2.27E-11 | 1.16E-09 | 5.18E-10 | 13 |
| BP | GO:0022407 | 15/71 | 403/18670 | 2.42E-11 | 1.21E-09 | 5.42E-10 | 15 |
| BP | GO:2001242 | 11/71 | 165/18670 | 2.98E-11 | 1.47E-09 | 6.57E-10 | 11 |
| BP | GO:1903039 | 12/71 | 218/18670 | 3.31E-11 | 1.61E-09 | 7.21E-10 | 12 |
| BP | GO:0007584 | 12/71 | 219/18670 | 3.50E-11 | 1.67E-09 | 7.50E-10 | 12 |
| BP | GO:0001101 | 14/71 | 343/18670 | 3.58E-11 | 1.69E-09 | 7.58E-10 | 14 |
| BP | GO:1901342 | 15/71 | 422/18670 | 4.62E-11 | 2.15E-09 | 9.64E-10 | 15 |
| BP | GO:0010631 | 14/71 | 351/18670 | 4.87E-11 | 2.24E-09 | 1.00E-09 | 14 |
| BP | GO:0003018 | 11/71 | 173/18670 | 4.97E-11 | 2.25E-09 | 1.01E-09 | 11 |
| BP | GO:0090132 | 14/71 | 354/18670 | 5.45E-11 | 2.44E-09 | 1.09E-09 | 14 |
| BP | GO:0009408 | 11/71 | 176/18670 | 5.99E-11 | 2.64E-09 | 1.18E-09 | 11 |
| BP | GO:1904018 | 12/71 | 230/18670 | 6.19E-11 | 2.69E-09 | 1.21E-09 | 12 |
| BP | GO:0090130 | 14/71 | 360/18670 | 6.80E-11 | 2.93E-09 | 1.31E-09 | 14 |
| BP | GO:0097305 | 12/71 | 233/18670 | 7.19E-11 | 3.05E-09 | 1.37E-09 | 12 |
| BP | GO:1901655 | 9/71  | 93/18670  | 7.35E-11 | 3.08E-09 | 1.38E-09 | 9  |

|    |            |       |           |          |          |          |    |
|----|------------|-------|-----------|----------|----------|----------|----|
| BP | GO:0071453 | 12/71 | 234/18670 | 7.56E-11 | 3.13E-09 | 1.40E-09 | 12 |
| BP | GO:1901216 | 9/71  | 94/18670  | 8.10E-11 | 3.31E-09 | 1.48E-09 | 9  |
| BP | GO:0071216 | 12/71 | 236/18670 | 8.34E-11 | 3.37E-09 | 1.51E-09 | 12 |
| BP | GO:0032768 | 8/71  | 64/18670  | 1.09E-10 | 4.35E-09 | 1.95E-09 | 8  |
| BP | GO:0050678 | 14/71 | 378/18670 | 1.29E-10 | 5.11E-09 | 2.29E-09 | 14 |
| BP | GO:0045765 | 14/71 | 383/18670 | 1.54E-10 | 6.00E-09 | 2.69E-09 | 14 |
| BP | GO:0048661 | 9/71  | 101/18670 | 1.56E-10 | 6.00E-09 | 2.69E-09 | 9  |
| BP | GO:0050863 | 13/71 | 314/18670 | 1.63E-10 | 6.21E-09 | 2.78E-09 | 13 |
| BP | GO:0022409 | 12/71 | 255/18670 | 2.04E-10 | 7.68E-09 | 3.44E-09 | 12 |
| BP | GO:0043524 | 10/71 | 147/18670 | 2.06E-10 | 7.68E-09 | 3.44E-09 | 10 |
| BP | GO:0045766 | 11/71 | 204/18670 | 2.92E-10 | 1.08E-08 | 4.82E-09 | 11 |
| BP | GO:0042133 | 10/71 | 153/18670 | 3.06E-10 | 1.10E-08 | 4.94E-09 | 10 |
| BP | GO:0062013 | 10/71 | 153/18670 | 3.06E-10 | 1.10E-08 | 4.94E-09 | 10 |
| BP | GO:0051249 | 15/71 | 485/18670 | 3.22E-10 | 1.15E-08 | 5.14E-09 | 15 |
| BP | GO:0009612 | 11/71 | 210/18670 | 3.98E-10 | 1.40E-08 | 6.29E-09 | 11 |
| BP | GO:0061614 | 7/71  | 47/18670  | 4.73E-10 | 1.65E-08 | 7.41E-09 | 7  |
| BP | GO:0060249 | 14/71 | 437/18670 | 8.60E-10 | 2.92E-08 | 1.31E-08 | 14 |
| BP | GO:0007566 | 7/71  | 51/18670  | 8.61E-10 | 2.92E-08 | 1.31E-08 | 7  |
| BP | GO:0050999 | 7/71  | 51/18670  | 8.61E-10 | 2.92E-08 | 1.31E-08 | 7  |
| BP | GO:0001894 | 11/71 | 227/18670 | 9.09E-10 | 3.02E-08 | 1.35E-08 | 11 |
| BP | GO:0010634 | 10/71 | 171/18670 | 9.10E-10 | 3.02E-08 | 1.35E-08 | 10 |
| BP | GO:0009410 | 12/71 | 292/18670 | 9.62E-10 | 3.16E-08 | 1.42E-08 | 12 |
| BP | GO:0008637 | 9/71  | 124/18670 | 9.88E-10 | 3.21E-08 | 1.44E-08 | 9  |
| BP | GO:0032102 | 13/71 | 365/18670 | 1.03E-09 | 3.32E-08 | 1.49E-08 | 13 |
| BP | GO:0048511 | 12/71 | 295/18670 | 1.08E-09 | 3.45E-08 | 1.55E-08 | 12 |
| BP | GO:0008625 | 8/71  | 86/18670  | 1.22E-09 | 3.86E-08 | 1.73E-08 | 8  |
| BP | GO:0048771 | 10/71 | 179/18670 | 1.42E-09 | 4.41E-08 | 1.97E-08 | 10 |
| BP | GO:1903034 | 10/71 | 179/18670 | 1.42E-09 | 4.41E-08 | 1.97E-08 | 10 |
| BP | GO:0031669 | 11/71 | 237/18670 | 1.43E-09 | 4.41E-08 | 1.97E-08 | 11 |
| BP | GO:0010332 | 7/71  | 56/18670  | 1.70E-09 | 5.18E-08 | 2.32E-08 | 7  |
| BP | GO:0001667 | 14/71 | 461/18670 | 1.71E-09 | 5.18E-08 | 2.32E-08 | 14 |
| BP | GO:2000045 | 10/71 | 184/18670 | 1.86E-09 | 5.53E-08 | 2.48E-08 | 10 |
| BP | GO:0001819 | 14/71 | 464/18670 | 1.86E-09 | 5.53E-08 | 2.48E-08 | 14 |
| BP | GO:0034349 | 5/71  | 15/18670  | 2.01E-09 | 5.91E-08 | 2.65E-08 | 5  |
| BP | GO:0034612 | 12/71 | 312/18670 | 2.04E-09 | 5.94E-08 | 2.66E-08 | 12 |
| BP | GO:0001836 | 7/71  | 59/18670  | 2.48E-09 | 7.16E-08 | 3.21E-08 | 7  |
| BP | GO:0001503 | 13/71 | 398/18670 | 2.93E-09 | 8.40E-08 | 3.76E-08 | 13 |
| BP | GO:0008585 | 8/71  | 96/18670  | 2.96E-09 | 8.42E-08 | 3.77E-08 | 8  |
| BP | GO:0009411 | 9/71  | 141/18670 | 3.09E-09 | 8.72E-08 | 3.90E-08 | 9  |
| BP | GO:0016049 | 14/71 | 484/18670 | 3.20E-09 | 8.94E-08 | 4.00E-08 | 14 |
| BP | GO:0019216 | 13/71 | 410/18670 | 4.19E-09 | 1.16E-07 | 5.18E-08 | 13 |
| BP | GO:0055123 | 9/71  | 146/18670 | 4.21E-09 | 1.16E-07 | 5.18E-08 | 9  |
| BP | GO:0051251 | 12/71 | 334/18670 | 4.39E-09 | 1.19E-07 | 5.34E-08 | 12 |
| BP | GO:0060135 | 7/71  | 64/18670  | 4.44E-09 | 1.19E-07 | 5.34E-08 | 7  |
| BP | GO:0046545 | 8/71  | 101/18670 | 4.45E-09 | 1.19E-07 | 5.34E-08 | 8  |
| BP | GO:0050870 | 10/71 | 202/18670 | 4.58E-09 | 1.21E-07 | 5.41E-08 | 10 |
| BP | GO:1902806 | 10/71 | 202/18670 | 4.58E-09 | 1.21E-07 | 5.41E-08 | 10 |
| BP | GO:0007596 | 12/71 | 336/18670 | 4.69E-09 | 1.22E-07 | 5.48E-08 | 12 |
| BP | GO:0050900 | 14/71 | 499/18670 | 4.72E-09 | 1.22E-07 | 5.48E-08 | 14 |
| BP | GO:0061041 | 9/71  | 148/18670 | 4.74E-09 | 1.22E-07 | 5.48E-08 | 9  |
| BP | GO:0001558 | 13/71 | 416/18670 | 4.98E-09 | 1.28E-07 | 5.72E-08 | 13 |
| BP | GO:0071222 | 10/71 | 205/18670 | 5.27E-09 | 1.34E-07 | 6.00E-08 | 10 |
| BP | GO:0045428 | 7/71  | 66/18670  | 5.54E-09 | 1.39E-07 | 6.21E-08 | 7  |
| BP | GO:0007599 | 12/71 | 341/18670 | 5.54E-09 | 1.39E-07 | 6.21E-08 | 12 |
| BP | GO:0008630 | 8/71  | 104/18670 | 5.62E-09 | 1.39E-07 | 6.25E-08 | 8  |
| BP | GO:0050817 | 12/71 | 342/18670 | 5.72E-09 | 1.41E-07 | 6.32E-08 | 12 |
| BP | GO:0071456 | 10/71 | 207/18670 | 5.79E-09 | 1.42E-07 | 6.35E-08 | 10 |
| BP | GO:0046651 | 11/71 | 272/18670 | 6.06E-09 | 1.47E-07 | 6.60E-08 | 11 |
| BP | GO:0032943 | 11/71 | 274/18670 | 6.54E-09 | 1.58E-07 | 7.07E-08 | 11 |
| BP | GO:0051341 | 8/71  | 107/18670 | 7.04E-09 | 1.69E-07 | 7.56E-08 | 8  |
| BP | GO:1902042 | 6/71  | 39/18670  | 7.20E-09 | 1.71E-07 | 7.67E-08 | 6  |
| BP | GO:0071219 | 10/71 | 212/18670 | 7.28E-09 | 1.72E-07 | 7.70E-08 | 10 |
| BP | GO:0051090 | 13/71 | 432/18670 | 7.82E-09 | 1.83E-07 | 8.22E-08 | 13 |



|    |            |       |           |          |          |          |    |
|----|------------|-------|-----------|----------|----------|----------|----|
| BP | GO:0048732 | 13/71 | 434/18670 | 8.27E-09 | 1.92E-07 | 8.62E-08 | 13 |
| BP | GO:0036294 | 10/71 | 217/18670 | 9.10E-09 | 2.10E-07 | 9.43E-08 | 10 |
| BP | GO:1904019 | 8/71  | 111/18670 | 9.43E-09 | 2.17E-07 | 9.70E-08 | 8  |
| BP | GO:1902893 | 6/71  | 41/18670  | 9.87E-09 | 2.25E-07 | 1.01E-07 | 6  |
| BP | GO:0042063 | 11/71 | 290/18670 | 1.18E-08 | 2.67E-07 | 1.20E-07 | 11 |
| BP | GO:0010632 | 11/71 | 291/18670 | 1.22E-08 | 2.75E-07 | 1.23E-07 | 11 |
| BP | GO:0046660 | 8/71  | 115/18670 | 1.25E-08 | 2.79E-07 | 1.25E-07 | 8  |
| BP | GO:0030198 | 12/71 | 368/18670 | 1.29E-08 | 2.87E-07 | 1.29E-07 | 12 |
| BP | GO:0008631 | 6/71  | 43/18670  | 1.33E-08 | 2.90E-07 | 1.30E-07 | 6  |
| BP | GO:0045429 | 6/71  | 43/18670  | 1.33E-08 | 2.90E-07 | 1.30E-07 | 6  |
| BP | GO:0035690 | 12/71 | 369/18670 | 1.33E-08 | 2.90E-07 | 1.30E-07 | 12 |
| BP | GO:0051100 | 9/71  | 169/18670 | 1.52E-08 | 3.28E-07 | 1.47E-07 | 9  |
| BP | GO:1904407 | 6/71  | 44/18670  | 1.54E-08 | 3.30E-07 | 1.48E-07 | 6  |
| BP | GO:0070661 | 11/71 | 298/18670 | 1.56E-08 | 3.31E-07 | 1.48E-07 | 11 |
| BP | GO:0090068 | 11/71 | 298/18670 | 1.56E-08 | 3.31E-07 | 1.48E-07 | 11 |
| BP | GO:0002696 | 12/71 | 380/18670 | 1.85E-08 | 3.89E-07 | 1.74E-07 | 12 |
| BP | GO:0030193 | 7/71  | 79/18670  | 1.98E-08 | 4.15E-07 | 1.86E-07 | 7  |
| BP | GO:1900046 | 7/71  | 80/18670  | 2.16E-08 | 4.51E-07 | 2.02E-07 | 7  |
| BP | GO:2001235 | 9/71  | 179/18670 | 2.50E-08 | 5.18E-07 | 2.32E-07 | 9  |
| BP | GO:0071466 | 9/71  | 180/18670 | 2.62E-08 | 5.40E-07 | 2.42E-07 | 9  |
| BP | GO:0009416 | 11/71 | 314/18670 | 2.67E-08 | 5.46E-07 | 2.44E-07 | 11 |
| BP | GO:0010959 | 12/71 | 394/18670 | 2.75E-08 | 5.56E-07 | 2.49E-07 | 12 |
| BP | GO:0050867 | 12/71 | 394/18670 | 2.75E-08 | 5.56E-07 | 2.49E-07 | 12 |
| BP | GO:0006970 | 7/71  | 83/18670  | 2.80E-08 | 5.60E-07 | 2.51E-07 | 7  |
| BP | GO:0048145 | 7/71  | 83/18670  | 2.80E-08 | 5.60E-07 | 2.51E-07 | 7  |
| BP | GO:0008217 | 9/71  | 182/18670 | 2.89E-08 | 5.70E-07 | 2.55E-07 | 9  |
| BP | GO:0010821 | 9/71  | 182/18670 | 2.89E-08 | 5.70E-07 | 2.55E-07 | 9  |
| BP | GO:0035094 | 6/71  | 49/18670  | 3.00E-08 | 5.84E-07 | 2.62E-07 | 6  |
| BP | GO:0051205 | 6/71  | 49/18670  | 3.00E-08 | 5.84E-07 | 2.62E-07 | 6  |
| BP | GO:0048144 | 7/71  | 84/18670  | 3.05E-08 | 5.88E-07 | 2.63E-07 | 7  |
| BP | GO:0050818 | 7/71  | 84/18670  | 3.05E-08 | 5.88E-07 | 2.63E-07 | 7  |
| BP | GO:0042098 | 9/71  | 184/18670 | 3.17E-08 | 6.08E-07 | 2.72E-07 | 9  |
| BP | GO:0045926 | 10/71 | 249/18670 | 3.36E-08 | 6.41E-07 | 2.87E-07 | 10 |
| BP | GO:0009409 | 6/71  | 50/18670  | 3.40E-08 | 6.43E-07 | 2.88E-07 | 6  |
| BP | GO:0045785 | 12/71 | 403/18670 | 3.53E-08 | 6.65E-07 | 2.98E-07 | 12 |
| BP | GO:0032103 | 11/71 | 323/18670 | 3.56E-08 | 6.67E-07 | 2.99E-07 | 11 |
| BP | GO:1905475 | 9/71  | 187/18670 | 3.65E-08 | 6.80E-07 | 3.05E-07 | 9  |
| BP | GO:1903829 | 11/71 | 324/18670 | 3.68E-08 | 6.81E-07 | 3.05E-07 | 11 |
| BP | GO:0048565 | 8/71  | 134/18670 | 4.15E-08 | 7.65E-07 | 3.43E-07 | 8  |
| BP | GO:0097194 | 7/71  | 88/18670  | 4.22E-08 | 7.74E-07 | 3.47E-07 | 7  |
| BP | GO:0034605 | 8/71  | 137/18670 | 4.93E-08 | 8.96E-07 | 4.01E-07 | 8  |
| BP | GO:1903035 | 7/71  | 90/18670  | 4.94E-08 | 8.96E-07 | 4.01E-07 | 7  |
| BP | GO:0033135 | 8/71  | 139/18670 | 5.53E-08 | 9.96E-07 | 4.46E-07 | 8  |
| BP | GO:0043062 | 12/71 | 422/18670 | 5.84E-08 | 1.05E-06 | 4.69E-07 | 12 |
| BP | GO:0033273 | 7/71  | 93/18670  | 6.21E-08 | 1.11E-06 | 4.96E-07 | 7  |
| BP | GO:0048638 | 11/71 | 347/18670 | 7.38E-08 | 1.31E-06 | 5.87E-07 | 11 |
| BP | GO:0043525 | 6/71  | 57/18670  | 7.59E-08 | 1.33E-06 | 5.96E-07 | 6  |
| BP | GO:1903428 | 6/71  | 57/18670  | 7.59E-08 | 1.33E-06 | 5.96E-07 | 6  |
| BP | GO:0010575 | 5/71  | 29/18670  | 7.62E-08 | 1.33E-06 | 5.96E-07 | 5  |
| BP | GO:0051384 | 8/71  | 146/18670 | 8.10E-08 | 1.41E-06 | 6.30E-07 | 8  |
| BP | GO:1902041 | 6/71  | 58/18670  | 8.44E-08 | 1.46E-06 | 6.54E-07 | 6  |
| BP | GO:2001243 | 7/71  | 98/18670  | 8.93E-08 | 1.54E-06 | 6.88E-07 | 7  |
| BP | GO:0050670 | 9/71  | 208/18670 | 9.11E-08 | 1.55E-06 | 6.96E-07 | 9  |
| BP | GO:0001844 | 5/71  | 30/18670  | 9.12E-08 | 1.55E-06 | 6.96E-07 | 5  |
| BP | GO:0010623 | 4/71  | 12/18670  | 9.29E-08 | 1.57E-06 | 7.05E-07 | 4  |
| BP | GO:0097755 | 6/71  | 59/18670  | 9.37E-08 | 1.58E-06 | 7.07E-07 | 6  |
| BP | GO:0014074 | 8/71  | 149/18670 | 9.48E-08 | 1.58E-06 | 7.10E-07 | 8  |
| BP | GO:0032944 | 9/71  | 209/18670 | 9.49E-08 | 1.58E-06 | 7.10E-07 | 9  |
| BP | GO:0000082 | 10/71 | 279/18670 | 9.78E-08 | 1.62E-06 | 7.27E-07 | 10 |
| BP | GO:1903426 | 7/71  | 101/18670 | 1.10E-07 | 1.82E-06 | 8.14E-07 | 7  |
| BP | GO:2001244 | 6/71  | 61/18670  | 1.15E-07 | 1.89E-06 | 8.45E-07 | 6  |
| BP | GO:0051348 | 10/71 | 285/18670 | 1.19E-07 | 1.95E-06 | 8.74E-07 | 10 |
| BP | GO:0043281 | 9/71  | 215/18670 | 1.21E-07 | 1.97E-06 | 8.82E-07 | 9  |

|    |            |       |           |          |          |          |    |
|----|------------|-------|-----------|----------|----------|----------|----|
| BP | GO:0045907 | 5/71  | 32/18670  | 1.28E-07 | 2.08E-06 | 9.30E-07 | 5  |
| BP | GO:0008406 | 9/71  | 217/18670 | 1.31E-07 | 2.11E-06 | 9.45E-07 | 9  |
| BP | GO:1904951 | 12/71 | 456/18670 | 1.35E-07 | 2.17E-06 | 9.73E-07 | 12 |
| BP | GO:0010001 | 9/71  | 218/18670 | 1.36E-07 | 2.17E-06 | 9.73E-07 | 9  |
| BP | GO:0033138 | 7/71  | 105/18670 | 1.44E-07 | 2.29E-06 | 1.02E-06 | 7  |
| BP | GO:0071356 | 10/71 | 291/18670 | 1.45E-07 | 2.29E-06 | 1.03E-06 | 10 |
| BP | GO:0002526 | 9/71  | 220/18670 | 1.47E-07 | 2.31E-06 | 1.04E-06 | 9  |
| BP | GO:0051204 | 5/71  | 33/18670  | 1.51E-07 | 2.36E-06 | 1.06E-06 | 5  |
| BP | GO:0070663 | 9/71  | 222/18670 | 1.59E-07 | 2.48E-06 | 1.11E-06 | 9  |
| BP | GO:0045137 | 9/71  | 223/18670 | 1.65E-07 | 2.56E-06 | 1.15E-06 | 9  |
| BP | GO:0010574 | 5/71  | 34/18670  | 1.76E-07 | 2.72E-06 | 1.22E-06 | 5  |
| BP | GO:0042326 | 12/71 | 468/18670 | 1.79E-07 | 2.76E-06 | 1.23E-06 | 12 |
| BP | GO:0044843 | 10/71 | 298/18670 | 1.80E-07 | 2.76E-06 | 1.23E-06 | 10 |
| BP | GO:0031960 | 8/71  | 162/18670 | 1.81E-07 | 2.76E-06 | 1.23E-06 | 8  |
| BP | GO:0006631 | 11/71 | 383/18670 | 1.99E-07 | 3.03E-06 | 1.36E-06 | 11 |
| BP | GO:0042108 | 6/71  | 67/18670  | 2.03E-07 | 3.05E-06 | 1.37E-06 | 6  |
| BP | GO:0048662 | 6/71  | 67/18670  | 2.03E-07 | 3.05E-06 | 1.37E-06 | 6  |
| BP | GO:0001893 | 5/71  | 35/18670  | 2.05E-07 | 3.05E-06 | 1.37E-06 | 5  |
| BP | GO:1901030 | 5/71  | 35/18670  | 2.05E-07 | 3.05E-06 | 1.37E-06 | 5  |
| BP | GO:1901653 | 11/71 | 385/18670 | 2.10E-07 | 3.12E-06 | 1.40E-06 | 11 |
| BP | GO:0045787 | 11/71 | 389/18670 | 2.33E-07 | 3.44E-06 | 1.54E-06 | 11 |
| BP | GO:0010573 | 5/71  | 36/18670  | 2.37E-07 | 3.46E-06 | 1.55E-06 | 5  |
| BP | GO:1901099 | 5/71  | 36/18670  | 2.37E-07 | 3.46E-06 | 1.55E-06 | 5  |
| BP | GO:2001240 | 5/71  | 36/18670  | 2.37E-07 | 3.46E-06 | 1.55E-06 | 5  |
| BP | GO:0032963 | 7/71  | 115/18670 | 2.69E-07 | 3.90E-06 | 1.75E-06 | 7  |
| BP | GO:2000116 | 9/71  | 239/18670 | 2.97E-07 | 4.29E-06 | 1.92E-06 | 9  |
| BP | GO:0010822 | 7/71  | 117/18670 | 3.02E-07 | 4.35E-06 | 1.95E-06 | 7  |
| BP | GO:0001936 | 8/71  | 176/18670 | 3.41E-07 | 4.89E-06 | 2.19E-06 | 8  |
| BP | GO:0048872 | 9/71  | 246/18670 | 3.78E-07 | 5.40E-06 | 2.42E-06 | 9  |
| BP | GO:0150076 | 6/71  | 75/18670  | 3.99E-07 | 5.67E-06 | 2.54E-06 | 6  |
| BP | GO:1905477 | 7/71  | 122/18670 | 4.02E-07 | 5.69E-06 | 2.55E-06 | 7  |
| BP | GO:0042180 | 9/71  | 248/18670 | 4.05E-07 | 5.70E-06 | 2.56E-06 | 9  |
| BP | GO:0006352 | 9/71  | 249/18670 | 4.19E-07 | 5.88E-06 | 2.63E-06 | 9  |
| BP | GO:0010565 | 8/71  | 181/18670 | 4.22E-07 | 5.90E-06 | 2.64E-06 | 8  |
| BP | GO:0046902 | 6/71  | 76/18670  | 4.32E-07 | 5.99E-06 | 2.68E-06 | 6  |
| BP | GO:0061045 | 6/71  | 76/18670  | 4.32E-07 | 5.99E-06 | 2.68E-06 | 6  |
| BP | GO:0031649 | 4/71  | 17/18670  | 4.40E-07 | 6.07E-06 | 2.72E-06 | 4  |
| BP | GO:0051101 | 7/71  | 124/18670 | 4.49E-07 | 6.18E-06 | 2.77E-06 | 7  |
| BP | GO:0051235 | 10/71 | 330/18670 | 4.62E-07 | 6.32E-06 | 2.83E-06 | 10 |
| BP | GO:0008202 | 10/71 | 331/18670 | 4.74E-07 | 6.44E-06 | 2.89E-06 | 10 |
| BP | GO:2000134 | 7/71  | 125/18670 | 4.75E-07 | 6.44E-06 | 2.89E-06 | 7  |
| BP | GO:0051924 | 9/71  | 254/18670 | 4.95E-07 | 6.69E-06 | 3.00E-06 | 9  |
| BP | GO:0030336 | 10/71 | 334/18670 | 5.15E-07 | 6.94E-06 | 3.11E-06 | 10 |
| BP | GO:0030308 | 8/71  | 186/18670 | 5.20E-07 | 6.97E-06 | 3.12E-06 | 8  |
| BP | GO:0050730 | 9/71  | 256/18670 | 5.28E-07 | 7.06E-06 | 3.16E-06 | 9  |
| BP | GO:0043536 | 6/71  | 79/18670  | 5.45E-07 | 7.22E-06 | 3.23E-06 | 6  |
| BP | GO:0071260 | 6/71  | 79/18670  | 5.45E-07 | 7.22E-06 | 3.23E-06 | 6  |
| BP | GO:0006367 | 8/71  | 188/18670 | 5.64E-07 | 7.44E-06 | 3.33E-06 | 8  |
| BP | GO:0045930 | 10/71 | 338/18670 | 5.74E-07 | 7.55E-06 | 3.38E-06 | 10 |
| BP | GO:0001933 | 11/71 | 429/18670 | 6.15E-07 | 8.06E-06 | 3.61E-06 | 11 |
| BP | GO:0050671 | 7/71  | 130/18670 | 6.19E-07 | 8.08E-06 | 3.62E-06 | 7  |
| BP | GO:0001935 | 8/71  | 191/18670 | 6.35E-07 | 8.26E-06 | 3.70E-06 | 8  |
| BP | GO:0032946 | 7/71  | 131/18670 | 6.52E-07 | 8.41E-06 | 3.77E-06 | 7  |
| BP | GO:1902807 | 7/71  | 131/18670 | 6.52E-07 | 8.41E-06 | 3.77E-06 | 7  |
| BP | GO:1901028 | 5/71  | 44/18670  | 6.67E-07 | 8.57E-06 | 3.84E-06 | 5  |
| BP | GO:0045913 | 6/71  | 83/18670  | 7.31E-07 | 9.35E-06 | 4.19E-06 | 6  |
| BP | GO:0007006 | 7/71  | 134/18670 | 7.61E-07 | 9.66E-06 | 4.33E-06 | 7  |
| BP | GO:0046683 | 7/71  | 134/18670 | 7.61E-07 | 9.66E-06 | 4.33E-06 | 7  |
| BP | GO:2000146 | 10/71 | 349/18670 | 7.69E-07 | 9.73E-06 | 4.36E-06 | 10 |
| BP | GO:0002685 | 8/71  | 196/18670 | 7.73E-07 | 9.74E-06 | 4.36E-06 | 8  |
| BP | GO:0007548 | 9/71  | 270/18670 | 8.24E-07 | 1.04E-05 | 4.64E-06 | 9  |
| BP | GO:0031099 | 8/71  | 198/18670 | 8.34E-07 | 1.04E-05 | 4.68E-06 | 8  |
| BP | GO:1904705 | 6/71  | 85/18670  | 8.42E-07 | 1.05E-05 | 4.68E-06 | 6  |

|    |            |       |           |          |          |          |    |
|----|------------|-------|-----------|----------|----------|----------|----|
| BP | GO:1990874 | 6/71  | 85/18670  | 8.42E-07 | 1.05E-05 | 4.68E-06 | 6  |
| BP | GO:1901990 | 11/71 | 444/18670 | 8.62E-07 | 1.07E-05 | 4.78E-06 | 11 |
| BP | GO:0001505 | 10/71 | 354/18670 | 8.75E-07 | 1.08E-05 | 4.83E-06 | 10 |
| BP | GO:0072655 | 7/71  | 137/18670 | 8.83E-07 | 1.08E-05 | 4.86E-06 | 7  |
| BP | GO:0070542 | 6/71  | 86/18670  | 9.02E-07 | 1.10E-05 | 4.92E-06 | 6  |
| BP | GO:0090559 | 6/71  | 86/18670  | 9.02E-07 | 1.10E-05 | 4.92E-06 | 6  |
| BP | GO:0043542 | 9/71  | 273/18670 | 9.04E-07 | 1.10E-05 | 4.92E-06 | 9  |
| BP | GO:0006953 | 5/71  | 47/18670  | 9.34E-07 | 1.13E-05 | 5.05E-06 | 5  |
| BP | GO:2001239 | 5/71  | 47/18670  | 9.34E-07 | 1.13E-05 | 5.05E-06 | 5  |
| BP | GO:0043270 | 9/71  | 275/18670 | 9.60E-07 | 1.15E-05 | 5.17E-06 | 9  |
| BP | GO:0001892 | 6/71  | 87/18670  | 9.66E-07 | 1.16E-05 | 5.18E-06 | 6  |
| BP | GO:0070665 | 7/71  | 139/18670 | 9.74E-07 | 1.16E-05 | 5.21E-06 | 7  |
| BP | GO:0052547 | 11/71 | 452/18670 | 1.03E-06 | 1.22E-05 | 5.47E-06 | 11 |
| BP | GO:0090199 | 5/71  | 48/18670  | 1.04E-06 | 1.23E-05 | 5.52E-06 | 5  |
| BP | GO:0031331 | 10/71 | 361/18670 | 1.04E-06 | 1.23E-05 | 5.53E-06 | 10 |
| BP | GO:0070585 | 7/71  | 141/18670 | 1.07E-06 | 1.26E-05 | 5.65E-06 | 7  |
| BP | GO:0055093 | 4/71  | 21/18670  | 1.09E-06 | 1.28E-05 | 5.75E-06 | 4  |
| BP | GO:0038127 | 7/71  | 142/18670 | 1.12E-06 | 1.30E-05 | 5.84E-06 | 7  |
| BP | GO:0006109 | 8/71  | 206/18670 | 1.12E-06 | 1.30E-05 | 5.84E-06 | 8  |
| BP | GO:0050679 | 8/71  | 206/18670 | 1.12E-06 | 1.30E-05 | 5.84E-06 | 8  |
| BP | GO:0007623 | 8/71  | 208/18670 | 1.21E-06 | 1.40E-05 | 6.26E-06 | 8  |
| BP | GO:0071229 | 8/71  | 209/18670 | 1.25E-06 | 1.44E-05 | 6.44E-06 | 8  |
| BP | GO:0014909 | 6/71  | 91/18670  | 1.26E-06 | 1.44E-05 | 6.44E-06 | 6  |
| BP | GO:0045639 | 6/71  | 91/18670  | 1.26E-06 | 1.44E-05 | 6.44E-06 | 6  |
| BP | GO:0060333 | 6/71  | 91/18670  | 1.26E-06 | 1.44E-05 | 6.44E-06 | 6  |
| BP | GO:0034976 | 9/71  | 285/18670 | 1.29E-06 | 1.47E-05 | 6.57E-06 | 9  |
| BP | GO:0071901 | 7/71  | 145/18670 | 1.29E-06 | 1.47E-05 | 6.57E-06 | 7  |
| BP | GO:0010869 | 4/71  | 22/18670  | 1.33E-06 | 1.51E-05 | 6.74E-06 | 4  |
| BP | GO:0042542 | 7/71  | 146/18670 | 1.36E-06 | 1.52E-05 | 6.81E-06 | 7  |
| BP | GO:0045834 | 7/71  | 146/18670 | 1.36E-06 | 1.52E-05 | 6.81E-06 | 7  |
| BP | GO:0001701 | 10/71 | 373/18670 | 1.40E-06 | 1.57E-05 | 7.03E-06 | 10 |
| BP | GO:0036473 | 6/71  | 93/18670  | 1.43E-06 | 1.60E-05 | 7.15E-06 | 6  |
| BP | GO:0014065 | 7/71  | 148/18670 | 1.48E-06 | 1.65E-05 | 7.38E-06 | 7  |
| BP | GO:0043393 | 8/71  | 217/18670 | 1.66E-06 | 1.84E-05 | 8.23E-06 | 8  |
| BP | GO:0030195 | 5/71  | 53/18670  | 1.72E-06 | 1.89E-05 | 8.48E-06 | 5  |
| BP | GO:0019217 | 6/71  | 96/18670  | 1.73E-06 | 1.90E-05 | 8.50E-06 | 6  |
| BP | GO:0051271 | 10/71 | 384/18670 | 1.82E-06 | 2.00E-05 | 8.94E-06 | 10 |
| BP | GO:0015908 | 6/71  | 97/18670  | 1.83E-06 | 2.00E-05 | 8.98E-06 | 6  |
| BP | GO:1901987 | 11/71 | 480/18670 | 1.84E-06 | 2.01E-05 | 8.99E-06 | 11 |
| BP | GO:0030168 | 7/71  | 153/18670 | 1.85E-06 | 2.01E-05 | 9.01E-06 | 7  |
| BP | GO:0002763 | 5/71  | 54/18670  | 1.89E-06 | 2.02E-05 | 9.05E-06 | 5  |
| BP | GO:0097345 | 5/71  | 54/18670  | 1.89E-06 | 2.02E-05 | 9.05E-06 | 5  |
| BP | GO:1900047 | 5/71  | 54/18670  | 1.89E-06 | 2.02E-05 | 9.05E-06 | 5  |
| BP | GO:1904645 | 5/71  | 54/18670  | 1.89E-06 | 2.02E-05 | 9.05E-06 | 5  |
| BP | GO:0018105 | 9/71  | 299/18670 | 1.92E-06 | 2.05E-05 | 9.17E-06 | 9  |
| BP | GO:0046697 | 4/71  | 24/18670  | 1.93E-06 | 2.05E-05 | 9.18E-06 | 4  |
| BP | GO:0050727 | 11/71 | 485/18670 | 2.04E-06 | 2.16E-05 | 9.68E-06 | 11 |
| BP | GO:0001541 | 5/71  | 55/18670  | 2.07E-06 | 2.19E-05 | 9.80E-06 | 5  |
| BP | GO:0007259 | 7/71  | 156/18670 | 2.11E-06 | 2.21E-05 | 9.91E-06 | 7  |
| BP | GO:0042129 | 7/71  | 156/18670 | 2.11E-06 | 2.21E-05 | 9.91E-06 | 7  |
| BP | GO:0043535 | 7/71  | 156/18670 | 2.11E-06 | 2.21E-05 | 9.91E-06 | 7  |
| BP | GO:0043271 | 7/71  | 157/18670 | 2.20E-06 | 2.29E-05 | 1.03E-05 | 7  |
| BP | GO:1905952 | 7/71  | 157/18670 | 2.20E-06 | 2.29E-05 | 1.03E-05 | 7  |
| BP | GO:0040013 | 10/71 | 396/18670 | 2.40E-06 | 2.49E-05 | 1.12E-05 | 10 |
| BP | GO:0050819 | 5/71  | 57/18670  | 2.48E-06 | 2.56E-05 | 1.15E-05 | 5  |
| BP | GO:0032091 | 6/71  | 103/18670 | 2.61E-06 | 2.69E-05 | 1.21E-05 | 6  |
| BP | GO:0030194 | 4/71  | 26/18670  | 2.69E-06 | 2.72E-05 | 1.22E-05 | 4  |
| BP | GO:0032800 | 4/71  | 26/18670  | 2.69E-06 | 2.72E-05 | 1.22E-05 | 4  |
| BP | GO:1900048 | 4/71  | 26/18670  | 2.69E-06 | 2.72E-05 | 1.22E-05 | 4  |
| BP | GO:1900739 | 4/71  | 26/18670  | 2.69E-06 | 2.72E-05 | 1.22E-05 | 4  |
| BP | GO:1900740 | 4/71  | 26/18670  | 2.69E-06 | 2.72E-05 | 1.22E-05 | 4  |
| BP | GO:0019229 | 5/71  | 58/18670  | 2.70E-06 | 2.72E-05 | 1.22E-05 | 5  |
| BP | GO:0031663 | 5/71  | 58/18670  | 2.70E-06 | 2.72E-05 | 1.22E-05 | 5  |

|    |            |       |           |          |          |          |    |
|----|------------|-------|-----------|----------|----------|----------|----|
| BP | GO:0032722 | 5/71  | 58/18670  | 2.70E-06 | 2.72E-05 | 1.22E-05 | 5  |
| BP | GO:0014812 | 6/71  | 104/18670 | 2.76E-06 | 2.76E-05 | 1.24E-05 | 6  |
| BP | GO:0071887 | 6/71  | 104/18670 | 2.76E-06 | 2.76E-05 | 1.24E-05 | 6  |
| BP | GO:0045931 | 7/71  | 163/18670 | 2.83E-06 | 2.82E-05 | 1.26E-05 | 7  |
| BP | GO:0006469 | 8/71  | 235/18670 | 3.01E-06 | 2.99E-05 | 1.34E-05 | 8  |
| BP | GO:0007093 | 7/71  | 165/18670 | 3.07E-06 | 3.04E-05 | 1.36E-05 | 7  |
| BP | GO:0050820 | 4/71  | 27/18670  | 3.15E-06 | 3.11E-05 | 1.39E-05 | 4  |
| BP | GO:1902175 | 4/71  | 27/18670  | 3.15E-06 | 3.11E-05 | 1.39E-05 | 4  |
| BP | GO:0097696 | 7/71  | 166/18670 | 3.19E-06 | 3.13E-05 | 1.40E-05 | 7  |
| BP | GO:1902110 | 5/71  | 60/18670  | 3.20E-06 | 3.13E-05 | 1.40E-05 | 5  |
| BP | GO:0007050 | 8/71  | 237/18670 | 3.20E-06 | 3.13E-05 | 1.40E-05 | 8  |
| BP | GO:0090303 | 5/71  | 61/18670  | 3.48E-06 | 3.39E-05 | 1.52E-05 | 5  |
| BP | GO:0018209 | 9/71  | 322/18670 | 3.52E-06 | 3.42E-05 | 1.53E-05 | 9  |
| BP | GO:0032770 | 4/71  | 28/18670  | 3.67E-06 | 3.54E-05 | 1.58E-05 | 4  |
| BP | GO:0036296 | 4/71  | 28/18670  | 3.67E-06 | 3.54E-05 | 1.58E-05 | 4  |
| BP | GO:0042730 | 4/71  | 28/18670  | 3.67E-06 | 3.54E-05 | 1.58E-05 | 4  |
| BP | GO:0030099 | 10/71 | 416/18670 | 3.72E-06 | 3.57E-05 | 1.60E-05 | 10 |
| BP | GO:0002260 | 5/71  | 62/18670  | 3.77E-06 | 3.59E-05 | 1.61E-05 | 5  |
| BP | GO:0046824 | 5/71  | 62/18670  | 3.77E-06 | 3.59E-05 | 1.61E-05 | 5  |
| BP | GO:1902686 | 5/71  | 62/18670  | 3.77E-06 | 3.59E-05 | 1.61E-05 | 5  |
| BP | GO:0009615 | 9/71  | 326/18670 | 3.89E-06 | 3.69E-05 | 1.65E-05 | 9  |
| BP | GO:0010506 | 9/71  | 327/18670 | 3.99E-06 | 3.78E-05 | 1.69E-05 | 9  |
| BP | GO:0001655 | 9/71  | 330/18670 | 4.29E-06 | 4.06E-05 | 1.82E-05 | 9  |
| BP | GO:0009896 | 10/71 | 423/18670 | 4.31E-06 | 4.06E-05 | 1.82E-05 | 10 |
| BP | GO:0035794 | 5/71  | 64/18670  | 4.42E-06 | 4.15E-05 | 1.86E-05 | 5  |
| BP | GO:0043200 | 6/71  | 113/18670 | 4.47E-06 | 4.19E-05 | 1.88E-05 | 6  |
| BP | GO:0052548 | 10/71 | 425/18670 | 4.49E-06 | 4.20E-05 | 1.88E-05 | 10 |
| BP | GO:0090150 | 9/71  | 332/18670 | 4.51E-06 | 4.20E-05 | 1.88E-05 | 9  |
| BP | GO:0042035 | 6/71  | 114/18670 | 4.71E-06 | 4.37E-05 | 1.96E-05 | 6  |
| BP | GO:0071902 | 9/71  | 334/18670 | 4.73E-06 | 4.38E-05 | 1.96E-05 | 9  |
| BP | GO:0071383 | 8/71  | 250/18670 | 4.75E-06 | 4.39E-05 | 1.97E-05 | 8  |
| BP | GO:0048568 | 10/71 | 428/18670 | 4.78E-06 | 4.40E-05 | 1.97E-05 | 10 |
| BP | GO:0001782 | 4/71  | 30/18670  | 4.88E-06 | 4.47E-05 | 2.00E-05 | 4  |
| BP | GO:0071480 | 4/71  | 30/18670  | 4.88E-06 | 4.47E-05 | 2.00E-05 | 4  |
| BP | GO:1902108 | 5/71  | 66/18670  | 5.15E-06 | 4.69E-05 | 2.10E-05 | 5  |
| BP | GO:1905710 | 5/71  | 66/18670  | 5.15E-06 | 4.69E-05 | 2.10E-05 | 5  |
| BP | GO:0007569 | 6/71  | 116/18670 | 5.21E-06 | 4.73E-05 | 2.12E-05 | 6  |
| BP | GO:0071347 | 7/71  | 179/18670 | 5.25E-06 | 4.76E-05 | 2.13E-05 | 7  |
| BP | GO:0043534 | 7/71  | 180/18670 | 5.45E-06 | 4.91E-05 | 2.20E-05 | 7  |
| BP | GO:0071346 | 7/71  | 180/18670 | 5.45E-06 | 4.91E-05 | 2.20E-05 | 7  |
| BP | GO:0010165 | 4/71  | 31/18670  | 5.59E-06 | 5.01E-05 | 2.25E-05 | 4  |
| BP | GO:1902895 | 4/71  | 31/18670  | 5.59E-06 | 5.01E-05 | 2.25E-05 | 4  |
| BP | GO:0048015 | 7/71  | 181/18670 | 5.65E-06 | 5.04E-05 | 2.26E-05 | 7  |
| BP | GO:0006839 | 8/71  | 256/18670 | 5.65E-06 | 5.04E-05 | 2.26E-05 | 8  |
| BP | GO:0033673 | 8/71  | 257/18670 | 5.82E-06 | 5.17E-05 | 2.32E-05 | 8  |
| BP | GO:0019915 | 5/71  | 68/18670  | 5.97E-06 | 5.29E-05 | 2.37E-05 | 5  |
| BP | GO:0001660 | 3/71  | 10/18670  | 6.20E-06 | 5.46E-05 | 2.45E-05 | 3  |
| BP | GO:0032025 | 3/71  | 10/18670  | 6.20E-06 | 5.46E-05 | 2.45E-05 | 3  |
| BP | GO:0051918 | 3/71  | 10/18670  | 6.20E-06 | 5.46E-05 | 2.45E-05 | 3  |
| BP | GO:0048017 | 7/71  | 184/18670 | 6.29E-06 | 5.52E-05 | 2.47E-05 | 7  |
| BP | GO:0042698 | 5/71  | 69/18670  | 6.41E-06 | 5.61E-05 | 2.52E-05 | 5  |
| BP | GO:0050766 | 5/71  | 70/18670  | 6.89E-06 | 6.01E-05 | 2.69E-05 | 5  |
| BP | GO:0010039 | 4/71  | 33/18670  | 7.23E-06 | 6.30E-05 | 2.82E-05 | 4  |
| BP | GO:0042089 | 6/71  | 123/18670 | 7.30E-06 | 6.34E-05 | 2.84E-05 | 6  |
| BP | GO:0030098 | 9/71  | 353/18670 | 7.40E-06 | 6.41E-05 | 2.87E-05 | 9  |
| BP | GO:0014066 | 6/71  | 124/18670 | 7.65E-06 | 6.59E-05 | 2.95E-05 | 6  |
| BP | GO:0042107 | 6/71  | 124/18670 | 7.65E-06 | 6.59E-05 | 2.95E-05 | 6  |
| BP | GO:0051881 | 5/71  | 72/18670  | 7.91E-06 | 6.79E-05 | 3.04E-05 | 5  |
| BP | GO:0061180 | 5/71  | 72/18670  | 7.91E-06 | 6.79E-05 | 3.04E-05 | 5  |
| BP | GO:0045471 | 6/71  | 125/18670 | 8.01E-06 | 6.84E-05 | 3.06E-05 | 6  |
| BP | GO:0042594 | 7/71  | 191/18670 | 8.04E-06 | 6.84E-05 | 3.06E-05 | 7  |
| BP | GO:0071478 | 7/71  | 191/18670 | 8.04E-06 | 6.84E-05 | 3.06E-05 | 7  |
| BP | GO:0043491 | 8/71  | 269/18670 | 8.12E-06 | 6.90E-05 | 3.09E-05 | 8  |

|    |            |       |           |          |             |          |    |
|----|------------|-------|-----------|----------|-------------|----------|----|
| BP | GO:0043276 | 4/71  | 34/18670  | 8.17E-06 | 6.92E-05    | 3.10E-05 | 4  |
| BP | GO:0050731 | 7/71  | 192/18670 | 8.32E-06 | 7.02E-05    | 3.15E-05 | 7  |
| BP | GO:0006801 | 5/71  | 73/18670  | 8.47E-06 | 7.12E-05    | 3.19E-05 | 5  |
| BP | GO:1903524 | 5/71  | 73/18670  | 8.47E-06 | 7.12E-05    | 3.19E-05 | 5  |
| BP | GO:0046886 | 3/71  | 11/18670  | 8.51E-06 | 7.13E-05    | 3.19E-05 | 3  |
| BP | GO:0032368 | 6/71  | 127/18670 | 8.78E-06 | 7.34E-05    | 3.29E-05 | 6  |
| BP | GO:1900182 | 5/71  | 74/18670  | 9.06E-06 | 7.54E-05    | 3.38E-05 | 5  |
| BP | GO:1903036 | 5/71  | 74/18670  | 9.06E-06 | 7.54E-05    | 3.38E-05 | 5  |
| BP | GO:0010595 | 6/71  | 128/18670 | 9.18E-06 | 7.62E-05    | 3.41E-05 | 6  |
| BP | GO:0018108 | 9/71  | 363/18670 | 9.26E-06 | 7.65E-05    | 3.43E-05 | 9  |
| BP | GO:0045862 | 9/71  | 363/18670 | 9.26E-06 | 7.65E-05    | 3.43E-05 | 9  |
| BP | GO:0006066 | 9/71  | 364/18670 | 9.47E-06 | 7.80E-05    | 3.49E-05 | 9  |
| BP | GO:0006869 | 9/71  | 365/18670 | 9.68E-06 | 7.95E-05    | 3.56E-05 | 9  |
| BP | GO:0018212 | 9/71  | 366/18670 | 9.89E-06 | 8.11E-05    | 3.63E-05 | 9  |
| BP | GO:0001822 | 8/71  | 278/18670 | 1.03E-05 | 8.43E-05    | 3.77E-05 | 8  |
| BP | GO:0042310 | 5/71  | 76/18670  | 1.03E-05 | 8.43E-05    | 3.77E-05 | 5  |
| BP | GO:0017038 | 7/71  | 199/18670 | 1.05E-05 | 8.53E-05    | 3.82E-05 | 7  |
| BP | GO:0034341 | 7/71  | 199/18670 | 1.05E-05 | 8.53E-05    | 3.82E-05 | 7  |
| BP | GO:0048678 | 5/71  | 77/18670  | 1.10E-05 | 8.92E-05    | 4.00E-05 | 5  |
| BP | GO:0030100 | 8/71  | 281/18670 | 1.12E-05 | 9.02E-05    | 4.04E-05 | 8  |
| BP | GO:0045080 | 3/71  | 12/18670  | 1.13E-05 | 9.12E-05    | 4.08E-05 | 3  |
| BP | GO:0034405 | 4/71  | 37/18670  | 1.15E-05 | 9.21E-05    | 4.12E-05 | 4  |
| BP | GO:0043029 | 4/71  | 37/18670  | 1.15E-05 | 9.21E-05    | 4.12E-05 | 4  |
| BP | GO:0045923 | 4/71  | 37/18670  | 1.15E-05 | 9.21E-05    | 4.12E-05 | 4  |
| BP | GO:2000273 | 4/71  | 37/18670  | 1.15E-05 | 9.21E-05    | 4.12E-05 | 4  |
| BP | GO:0072332 | 5/71  | 78/18670  | 1.17E-05 | 9.34E-05    | 4.18E-05 | 5  |
| BP | GO:0032409 | 8/71  | 283/18670 | 1.17E-05 | 9.34E-05    | 4.18E-05 | 8  |
| BP | GO:0032355 | 6/71  | 134/18670 | 1.19E-05 | 9.46E-05    | 4.24E-05 | 6  |
| BP | GO:0002573 | 7/71  | 204/18670 | 1.23E-05 | 9.74E-05    | 4.36E-05 | 7  |
| BP | GO:0034764 | 7/71  | 204/18670 | 1.23E-05 | 9.74E-05    | 4.36E-05 | 7  |
| BP | GO:0050921 | 6/71  | 135/18670 | 1.25E-05 | 9.80E-05    | 4.39E-05 | 6  |
| BP | GO:0046425 | 6/71  | 137/18670 | 1.35E-05 | 0.000106314 | 4.76E-05 | 6  |
| BP | GO:0070555 | 7/71  | 207/18670 | 1.36E-05 | 0.000106314 | 4.76E-05 | 7  |
| BP | GO:0007162 | 8/71  | 289/18670 | 1.37E-05 | 0.00010689  | 4.79E-05 | 8  |
| BP | GO:0070838 | 10/71 | 483/18670 | 1.37E-05 | 0.000107181 | 4.80E-05 | 10 |
| BP | GO:0048708 | 5/71  | 81/18670  | 1.41E-05 | 0.000109801 | 4.92E-05 | 5  |
| BP | GO:0051701 | 7/71  | 209/18670 | 1.44E-05 | 0.0001121   | 5.02E-05 | 7  |
| BP | GO:0090399 | 3/71  | 13/18670  | 1.47E-05 | 0.000113052 | 5.06E-05 | 3  |
| BP | GO:0090594 | 3/71  | 13/18670  | 1.47E-05 | 0.000113052 | 5.06E-05 | 3  |
| BP | GO:1902947 | 3/71  | 13/18670  | 1.47E-05 | 0.000113052 | 5.06E-05 | 3  |
| BP | GO:0032642 | 5/71  | 82/18670  | 1.50E-05 | 0.000114987 | 5.15E-05 | 5  |
| BP | GO:0034644 | 5/71  | 82/18670  | 1.50E-05 | 0.000114987 | 5.15E-05 | 5  |
| BP | GO:0072001 | 8/71  | 293/18670 | 1.51E-05 | 0.000115396 | 5.17E-05 | 8  |
| BP | GO:0009165 | 9/71  | 386/18670 | 1.51E-05 | 0.000115396 | 5.17E-05 | 9  |
| BP | GO:0072511 | 10/71 | 489/18670 | 1.53E-05 | 0.000116526 | 5.22E-05 | 10 |
| BP | GO:0071470 | 4/71  | 40/18670  | 1.58E-05 | 0.000120301 | 5.39E-05 | 4  |
| BP | GO:1901293 | 9/71  | 390/18670 | 1.64E-05 | 0.000124371 | 5.57E-05 | 9  |
| BP | GO:0014910 | 5/71  | 84/18670  | 1.69E-05 | 0.0001273   | 5.70E-05 | 5  |
| BP | GO:0097756 | 5/71  | 84/18670  | 1.69E-05 | 0.0001273   | 5.70E-05 | 5  |
| BP | GO:0006914 | 10/71 | 496/18670 | 1.73E-05 | 0.000129373 | 5.80E-05 | 10 |
| BP | GO:0061919 | 10/71 | 496/18670 | 1.73E-05 | 0.000129373 | 5.80E-05 | 10 |
| BP | GO:0006606 | 6/71  | 143/18670 | 1.73E-05 | 0.000129373 | 5.80E-05 | 6  |
| BP | GO:0030879 | 6/71  | 143/18670 | 1.73E-05 | 0.000129373 | 5.80E-05 | 6  |
| BP | GO:0000075 | 7/71  | 216/18670 | 1.79E-05 | 0.000133447 | 5.98E-05 | 7  |
| BP | GO:1904064 | 6/71  | 144/18670 | 1.80E-05 | 0.000133998 | 6.00E-05 | 6  |
| BP | GO:0050920 | 7/71  | 217/18670 | 1.84E-05 | 0.000136872 | 6.13E-05 | 7  |
| BP | GO:0051917 | 3/71  | 14/18670  | 1.86E-05 | 0.000138095 | 6.19E-05 | 3  |
| BP | GO:0001776 | 5/71  | 86/18670  | 1.89E-05 | 0.000139618 | 6.25E-05 | 5  |
| BP | GO:0006919 | 5/71  | 86/18670  | 1.89E-05 | 0.000139618 | 6.25E-05 | 5  |
| BP | GO:0035264 | 6/71  | 146/18670 | 1.94E-05 | 0.000142999 | 6.41E-05 | 6  |
| BP | GO:1904892 | 6/71  | 146/18670 | 1.94E-05 | 0.000142999 | 6.41E-05 | 6  |
| BP | GO:0060326 | 8/71  | 304/18670 | 1.97E-05 | 0.000144471 | 6.47E-05 | 8  |
| BP | GO:0010876 | 9/71  | 400/18670 | 2.00E-05 | 0.000146612 | 6.57E-05 | 9  |

|    |            |      |           |          |             |             |   |
|----|------------|------|-----------|----------|-------------|-------------|---|
| BP | GO:0002262 | 6/71 | 147/18670 | 2.02E-05 | 0.000147669 | 6.62E-05    | 6 |
| BP | GO:1904035 | 5/71 | 88/18670  | 2.11E-05 | 0.000154072 | 6.90E-05    | 5 |
| BP | GO:0006775 | 4/71 | 43/18670  | 2.12E-05 | 0.000154072 | 6.90E-05    | 4 |
| BP | GO:0009895 | 8/71 | 308/18670 | 2.16E-05 | 0.000156952 | 7.03E-05    | 8 |
| BP | GO:0009267 | 6/71 | 149/18670 | 2.18E-05 | 0.000158035 | 7.08E-05    | 6 |
| BP | GO:0045444 | 7/71 | 223/18670 | 2.19E-05 | 0.00015857  | 7.10E-05    | 7 |
| BP | GO:0032602 | 5/71 | 89/18670  | 2.23E-05 | 0.000160694 | 7.20E-05    | 5 |
| BP | GO:0046427 | 5/71 | 89/18670  | 2.23E-05 | 0.000160694 | 7.20E-05    | 5 |
| BP | GO:0042113 | 8/71 | 310/18670 | 2.27E-05 | 0.000162639 | 7.29E-05    | 8 |
| BP | GO:0030730 | 3/71 | 15/18670  | 2.32E-05 | 0.000165406 | 7.41E-05    | 3 |
| BP | GO:0032352 | 3/71 | 15/18670  | 2.32E-05 | 0.000165406 | 7.41E-05    | 3 |
| BP | GO:0045073 | 3/71 | 15/18670  | 2.32E-05 | 0.000165406 | 7.41E-05    | 3 |
| BP | GO:0046688 | 4/71 | 44/18670  | 2.32E-05 | 0.000165406 | 7.41E-05    | 4 |
| BP | GO:0007517 | 9/71 | 410/18670 | 2.43E-05 | 0.00017278  | 7.74E-05    | 9 |
| BP | GO:0045807 | 6/71 | 153/18670 | 2.53E-05 | 0.000179679 | 8.05E-05    | 6 |
| BP | GO:0010594 | 7/71 | 229/18670 | 2.60E-05 | 0.000184053 | 8.25E-05    | 7 |
| BP | GO:1904894 | 5/71 | 92/18670  | 2.62E-05 | 0.000185138 | 8.29E-05    | 5 |
| BP | GO:0006984 | 4/71 | 46/18670  | 2.78E-05 | 0.00019521  | 8.75E-05    | 4 |
| BP | GO:0045776 | 4/71 | 46/18670  | 2.78E-05 | 0.00019521  | 8.75E-05    | 4 |
| BP | GO:0042445 | 7/71 | 232/18670 | 2.83E-05 | 0.000196515 | 8.80E-05    | 7 |
| BP | GO:0034767 | 6/71 | 156/18670 | 2.83E-05 | 0.000196515 | 8.80E-05    | 6 |
| BP | GO:0051222 | 9/71 | 418/18670 | 2.83E-05 | 0.000196515 | 8.80E-05    | 9 |
| BP | GO:0010885 | 3/71 | 16/18670  | 2.85E-05 | 0.000196515 | 8.80E-05    | 3 |
| BP | GO:0042033 | 3/71 | 16/18670  | 2.85E-05 | 0.000196515 | 8.80E-05    | 3 |
| BP | GO:0045986 | 3/71 | 16/18670  | 2.85E-05 | 0.000196515 | 8.80E-05    | 3 |
| BP | GO:0050755 | 3/71 | 16/18670  | 2.85E-05 | 0.000196515 | 8.80E-05    | 3 |
| BP | GO:0071380 | 3/71 | 16/18670  | 2.85E-05 | 0.000196515 | 8.80E-05    | 3 |
| BP | GO:1900451 | 3/71 | 16/18670  | 2.85E-05 | 0.000196515 | 8.80E-05    | 3 |
| BP | GO:0070231 | 4/71 | 47/18670  | 3.03E-05 | 0.000208389 | 9.34E-05    | 4 |
| BP | GO:0043467 | 6/71 | 158/18670 | 3.04E-05 | 0.000208756 | 9.35E-05    | 6 |
| BP | GO:0042100 | 5/71 | 95/18670  | 3.06E-05 | 0.000209169 | 9.37E-05    | 5 |
| BP | GO:0042102 | 5/71 | 95/18670  | 3.06E-05 | 0.000209169 | 9.37E-05    | 5 |
| BP | GO:1903076 | 5/71 | 95/18670  | 3.06E-05 | 0.000209169 | 9.37E-05    | 5 |
| BP | GO:0048010 | 5/71 | 96/18670  | 3.22E-05 | 0.000219567 | 9.84E-05    | 5 |
| BP | GO:0051188 | 8/71 | 326/18670 | 3.24E-05 | 0.000220583 | 9.88E-05    | 8 |
| BP | GO:0051972 | 4/71 | 48/18670  | 3.29E-05 | 0.000223471 | 0.000100112 | 4 |
| BP | GO:0019058 | 8/71 | 328/18670 | 3.39E-05 | 0.000229445 | 0.000102789 | 8 |
| BP | GO:0070242 | 3/71 | 17/18670  | 3.45E-05 | 0.000232707 | 0.00010425  | 3 |
| BP | GO:2001267 | 3/71 | 17/18670  | 3.45E-05 | 0.000232707 | 0.00010425  | 3 |
| BP | GO:0051052 | 9/71 | 429/18670 | 3.47E-05 | 0.000233411 | 0.000104565 | 9 |
| BP | GO:0015718 | 6/71 | 162/18670 | 3.50E-05 | 0.000234947 | 0.000105253 | 6 |
| BP | GO:0050764 | 5/71 | 98/18670  | 3.56E-05 | 0.000238636 | 0.000106906 | 5 |
| BP | GO:0097300 | 4/71 | 49/18670  | 3.57E-05 | 0.000239249 | 0.000107181 | 4 |
| BP | GO:0031214 | 6/71 | 163/18670 | 3.62E-05 | 0.000241266 | 0.000108084 | 6 |
| BP | GO:0051170 | 6/71 | 163/18670 | 3.62E-05 | 0.000241266 | 0.000108084 | 6 |
| BP | GO:0032147 | 8/71 | 333/18670 | 3.77E-05 | 0.000250866 | 0.000112385 | 8 |
| BP | GO:0006816 | 9/71 | 434/18670 | 3.79E-05 | 0.000251903 | 0.00011285  | 9 |
| BP | GO:0002931 | 4/71 | 50/18670  | 3.87E-05 | 0.000256295 | 0.000114817 | 4 |
| BP | GO:0050680 | 6/71 | 165/18670 | 3.88E-05 | 0.000256295 | 0.000114817 | 6 |
| BP | GO:0043434 | 9/71 | 436/18670 | 3.93E-05 | 0.000259527 | 0.000116265 | 9 |
| BP | GO:0010878 | 3/71 | 18/18670  | 4.13E-05 | 0.000271921 | 0.000121818 | 3 |
| BP | GO:1901568 | 6/71 | 167/18670 | 4.15E-05 | 0.000272564 | 0.000122105 | 6 |
| BP | GO:0048146 | 4/71 | 51/18670  | 4.19E-05 | 0.000275082 | 0.000123233 | 4 |
| BP | GO:0097237 | 7/71 | 247/18670 | 4.22E-05 | 0.000276038 | 0.000123662 | 7 |
| BP | GO:0010522 | 5/71 | 102/18670 | 4.31E-05 | 0.000281932 | 0.000126302 | 5 |
| BP | GO:1901991 | 7/71 | 248/18670 | 4.32E-05 | 0.000282102 | 0.000126378 | 7 |
| BP | GO:0050728 | 6/71 | 169/18670 | 4.43E-05 | 0.00028827  | 0.000129142 | 6 |
| BP | GO:0019318 | 7/71 | 249/18670 | 4.44E-05 | 0.00028827  | 0.000129142 | 7 |
| BP | GO:1904062 | 8/71 | 342/18670 | 4.55E-05 | 0.000295284 | 0.000132284 | 8 |
| BP | GO:0072330 | 8/71 | 343/18670 | 4.65E-05 | 0.000300845 | 0.000134775 | 8 |
| BP | GO:0016241 | 6/71 | 171/18670 | 4.73E-05 | 0.000305291 | 0.000136767 | 6 |
| BP | GO:0046822 | 5/71 | 104/18670 | 4.73E-05 | 0.000305291 | 0.000136767 | 5 |
| BP | GO:0045840 | 4/71 | 53/18670  | 4.88E-05 | 0.000311619 | 0.000139602 | 4 |

|    |            |      |           |          |             |             |   |
|----|------------|------|-----------|----------|-------------|-------------|---|
| BP | GO:0010544 | 3/71 | 19/18670  | 4.89E-05 | 0.000311619 | 0.000139602 | 3 |
| BP | GO:0010888 | 3/71 | 19/18670  | 4.89E-05 | 0.000311619 | 0.000139602 | 3 |
| BP | GO:0033189 | 3/71 | 19/18670  | 4.89E-05 | 0.000311619 | 0.000139602 | 3 |
| BP | GO:0051546 | 3/71 | 19/18670  | 4.89E-05 | 0.000311619 | 0.000139602 | 3 |
| BP | GO:1902176 | 3/71 | 19/18670  | 4.89E-05 | 0.000311619 | 0.000139602 | 3 |
| BP | GO:0001659 | 6/71 | 173/18670 | 5.05E-05 | 0.000321235 | 0.000143909 | 6 |
| BP | GO:0044774 | 5/71 | 106/18670 | 5.19E-05 | 0.000329386 | 0.000147561 | 5 |
| BP | GO:0010524 | 4/71 | 54/18670  | 5.26E-05 | 0.000332767 | 0.000149076 | 4 |
| BP | GO:0051353 | 4/71 | 54/18670  | 5.26E-05 | 0.000332767 | 0.000149076 | 4 |
| BP | GO:0007611 | 7/71 | 256/18670 | 5.29E-05 | 0.000333835 | 0.000149554 | 7 |
| BP | GO:0006986 | 6/71 | 176/18670 | 5.56E-05 | 0.000350182 | 0.000156878 | 6 |
| BP | GO:2000278 | 5/71 | 108/18670 | 5.67E-05 | 0.000356804 | 0.000159844 | 5 |
| BP | GO:0048469 | 6/71 | 177/18670 | 5.73E-05 | 0.000360038 | 0.000161293 | 6 |
| BP | GO:0051091 | 7/71 | 261/18670 | 5.97E-05 | 0.000374328 | 0.000167695 | 7 |
| BP | GO:0006977 | 4/71 | 56/18670  | 6.07E-05 | 0.000379255 | 0.000169902 | 4 |
| BP | GO:0031295 | 4/71 | 56/18670  | 6.07E-05 | 0.000379255 | 0.000169902 | 4 |
| BP | GO:0051099 | 6/71 | 179/18670 | 6.10E-05 | 0.00038038  | 0.000170406 | 6 |
| BP | GO:0034504 | 7/71 | 262/18670 | 6.12E-05 | 0.000380606 | 0.000170507 | 7 |
| BP | GO:0046394 | 9/71 | 462/18670 | 6.15E-05 | 0.000382006 | 0.000171134 | 9 |
| BP | GO:0016101 | 5/71 | 110/18670 | 6.19E-05 | 0.000383711 | 0.000171898 | 5 |
| BP | GO:0016053 | 9/71 | 463/18670 | 6.26E-05 | 0.000386973 | 0.00017336  | 9 |
| BP | GO:0031294 | 4/71 | 57/18670  | 6.51E-05 | 0.000400007 | 0.000179199 | 4 |
| BP | GO:0071398 | 4/71 | 57/18670  | 6.51E-05 | 0.000400007 | 0.000179199 | 4 |
| BP | GO:0072431 | 4/71 | 57/18670  | 6.51E-05 | 0.000400007 | 0.000179199 | 4 |
| BP | GO:1902400 | 4/71 | 57/18670  | 6.51E-05 | 0.000400007 | 0.000179199 | 4 |
| BP | GO:0036499 | 3/71 | 21/18670  | 6.67E-05 | 0.000408865 | 0.000183167 | 3 |
| BP | GO:0043254 | 9/71 | 467/18670 | 6.68E-05 | 0.000408865 | 0.000183167 | 9 |
| BP | GO:0046883 | 7/71 | 266/18670 | 6.73E-05 | 0.00040979  | 0.000183581 | 7 |
| BP | GO:0001938 | 5/71 | 112/18670 | 6.75E-05 | 0.00040979  | 0.000183581 | 5 |
| BP | GO:0043279 | 5/71 | 112/18670 | 6.75E-05 | 0.00040979  | 0.000183581 | 5 |
| BP | GO:1990748 | 5/71 | 112/18670 | 6.75E-05 | 0.00040979  | 0.000183581 | 5 |
| BP | GO:1901988 | 7/71 | 267/18670 | 6.89E-05 | 0.000417786 | 0.000187163 | 7 |
| BP | GO:0045861 | 8/71 | 363/18670 | 6.92E-05 | 0.000418683 | 0.000187565 | 8 |
| BP | GO:0061900 | 4/71 | 58/18670  | 6.98E-05 | 0.000420703 | 0.00018847  | 4 |
| BP | GO:1903749 | 4/71 | 58/18670  | 6.98E-05 | 0.000420703 | 0.00018847  | 4 |
| BP | GO:0031334 | 7/71 | 268/18670 | 7.05E-05 | 0.000424634 | 0.000190231 | 7 |
| BP | GO:1903708 | 6/71 | 185/18670 | 7.33E-05 | 0.000439434 | 0.000196862 | 6 |
| BP | GO:0002688 | 5/71 | 114/18670 | 7.34E-05 | 0.000439434 | 0.000196862 | 5 |
| BP | GO:0006690 | 5/71 | 114/18670 | 7.34E-05 | 0.000439434 | 0.000196862 | 5 |
| BP | GO:0045927 | 7/71 | 270/18670 | 7.39E-05 | 0.000441732 | 0.000197891 | 7 |
| BP | GO:0043388 | 4/71 | 59/18670  | 7.46E-05 | 0.000442059 | 0.000198037 | 4 |
| BP | GO:0072413 | 4/71 | 59/18670  | 7.46E-05 | 0.000442059 | 0.000198037 | 4 |
| BP | GO:1902402 | 4/71 | 59/18670  | 7.46E-05 | 0.000442059 | 0.000198037 | 4 |
| BP | GO:1902403 | 4/71 | 59/18670  | 7.46E-05 | 0.000442059 | 0.000198037 | 4 |
| BP | GO:2000351 | 4/71 | 59/18670  | 7.46E-05 | 0.000442059 | 0.000198037 | 4 |
| BP | GO:1904375 | 5/71 | 115/18670 | 7.65E-05 | 0.000451704 | 0.000202358 | 5 |
| BP | GO:0035809 | 3/71 | 22/18670  | 7.71E-05 | 0.000451704 | 0.000202358 | 3 |
| BP | GO:0042359 | 3/71 | 22/18670  | 7.71E-05 | 0.000451704 | 0.000202358 | 3 |
| BP | GO:0043496 | 3/71 | 22/18670  | 7.71E-05 | 0.000451704 | 0.000202358 | 3 |
| BP | GO:0071379 | 3/71 | 22/18670  | 7.71E-05 | 0.000451704 | 0.000202358 | 3 |
| BP | GO:1901522 | 3/71 | 22/18670  | 7.71E-05 | 0.000451704 | 0.000202358 | 3 |
| BP | GO:0032868 | 7/71 | 272/18670 | 7.74E-05 | 0.000452159 | 0.000202562 | 7 |
| BP | GO:1902105 | 7/71 | 272/18670 | 7.74E-05 | 0.000452159 | 0.000202562 | 7 |
| BP | GO:0021782 | 5/71 | 116/18670 | 7.97E-05 | 0.000464033 | 0.000207881 | 5 |
| BP | GO:1900180 | 5/71 | 116/18670 | 7.97E-05 | 0.000464033 | 0.000207881 | 5 |
| BP | GO:0002761 | 5/71 | 117/18670 | 8.30E-05 | 0.000480822 | 0.000215403 | 5 |
| BP | GO:0010906 | 5/71 | 117/18670 | 8.30E-05 | 0.000480822 | 0.000215403 | 5 |
| BP | GO:1900371 | 5/71 | 117/18670 | 8.30E-05 | 0.000480822 | 0.000215403 | 5 |
| BP | GO:1905953 | 4/71 | 61/18670  | 8.51E-05 | 0.000491813 | 0.000220326 | 4 |
| BP | GO:0030808 | 5/71 | 118/18670 | 8.64E-05 | 0.000498067 | 0.000223128 | 5 |
| BP | GO:0034765 | 9/71 | 483/18670 | 8.65E-05 | 0.000498067 | 0.000223128 | 9 |
| BP | GO:0034695 | 3/71 | 23/18670  | 8.84E-05 | 0.00050827  | 0.000227699 | 3 |
| BP | GO:0060485 | 7/71 | 278/18670 | 8.87E-05 | 0.000509374 | 0.000228193 | 7 |

|    |            |      |           |             |             |             |   |
|----|------------|------|-----------|-------------|-------------|-------------|---|
| BP | GO:0043112 | 6/71 | 192/18670 | 8.99E-05    | 0.000515499 | 0.000230938 | 6 |
| BP | GO:0070059 | 4/71 | 62/18670  | 9.07E-05    | 0.000517976 | 0.000232047 | 4 |
| BP | GO:0070265 | 4/71 | 62/18670  | 9.07E-05    | 0.000517976 | 0.000232047 | 4 |
| BP | GO:0003014 | 5/71 | 120/18670 | 9.36E-05    | 0.000532003 | 0.000238331 | 5 |
| BP | GO:0006721 | 5/71 | 120/18670 | 9.36E-05    | 0.000532003 | 0.000238331 | 5 |
| BP | GO:0022612 | 5/71 | 120/18670 | 9.36E-05    | 0.000532003 | 0.000238331 | 5 |
| BP | GO:0031571 | 4/71 | 63/18670  | 9.66E-05    | 0.000546854 | 0.000244984 | 4 |
| BP | GO:0044819 | 4/71 | 63/18670  | 9.66E-05    | 0.000546854 | 0.000244984 | 4 |
| BP | GO:0043618 | 5/71 | 121/18670 | 9.74E-05    | 0.000550507 | 0.000246621 | 5 |
| BP | GO:0021700 | 7/71 | 284/18670 | 0.000101348 | 0.000572086 | 0.000256288 | 7 |
| BP | GO:0044783 | 4/71 | 64/18670  | 0.000102694 | 0.000576773 | 0.000258388 | 4 |
| BP | GO:0045600 | 4/71 | 64/18670  | 0.000102694 | 0.000576773 | 0.000258388 | 4 |
| BP | GO:2000378 | 4/71 | 64/18670  | 0.000102694 | 0.000576773 | 0.000258388 | 4 |
| BP | GO:0010952 | 6/71 | 197/18670 | 0.000103598 | 0.000580876 | 0.000260226 | 6 |
| BP | GO:0051928 | 5/71 | 123/18670 | 0.000105204 | 0.000588895 | 0.000263818 | 5 |
| BP | GO:0044262 | 7/71 | 286/18670 | 0.000105869 | 0.000591633 | 0.000265045 | 7 |
| BP | GO:0046890 | 6/71 | 198/18670 | 0.000106518 | 0.000594265 | 0.000266224 | 6 |
| BP | GO:0002548 | 4/71 | 65/18670  | 0.000109115 | 0.000604879 | 0.000270979 | 4 |
| BP | GO:0006940 | 4/71 | 65/18670  | 0.000109115 | 0.000604879 | 0.000270979 | 4 |
| BP | GO:0072577 | 4/71 | 65/18670  | 0.000109115 | 0.000604879 | 0.000270979 | 4 |
| BP | GO:0007179 | 6/71 | 199/18670 | 0.000109502 | 0.000604879 | 0.000270979 | 6 |
| BP | GO:0035966 | 6/71 | 199/18670 | 0.000109502 | 0.000604879 | 0.000270979 | 6 |
| BP | GO:0050866 | 6/71 | 199/18670 | 0.000109502 | 0.000604879 | 0.000270979 | 6 |
| BP | GO:0009299 | 3/71 | 25/18670  | 0.000114148 | 0.000626414 | 0.000280626 | 3 |
| BP | GO:0019430 | 3/71 | 25/18670  | 0.000114148 | 0.000626414 | 0.000280626 | 3 |
| BP | GO:0032461 | 3/71 | 25/18670  | 0.000114148 | 0.000626414 | 0.000280626 | 3 |
| BP | GO:0060571 | 3/71 | 25/18670  | 0.000114148 | 0.000626414 | 0.000280626 | 3 |
| BP | GO:0040014 | 4/71 | 66/18670  | 0.000115823 | 0.0006325   | 0.000283353 | 4 |
| BP | GO:0051785 | 4/71 | 66/18670  | 0.000115823 | 0.0006325   | 0.000283353 | 4 |
| BP | GO:0051926 | 4/71 | 66/18670  | 0.000115823 | 0.0006325   | 0.000283353 | 4 |
| BP | GO:0005996 | 7/71 | 292/18670 | 0.00012043  | 0.000656586 | 0.000294143 | 7 |
| BP | GO:0030278 | 6/71 | 203/18670 | 0.000122114 | 0.000664689 | 0.000297773 | 6 |
| BP | GO:0043620 | 5/71 | 127/18670 | 0.000122338 | 0.000664831 | 0.000297837 | 5 |
| BP | GO:0019748 | 4/71 | 67/18670  | 0.000122825 | 0.000666307 | 0.000298498 | 4 |
| BP | GO:0051146 | 7/71 | 293/18670 | 0.000123008 | 0.000666307 | 0.000298498 | 7 |
| BP | GO:0035265 | 6/71 | 204/18670 | 0.00012544  | 0.00067839  | 0.000303911 | 6 |
| BP | GO:0002687 | 5/71 | 128/18670 | 0.000126938 | 0.000685385 | 0.000307045 | 5 |
| BP | GO:0033627 | 4/71 | 68/18670  | 0.000130129 | 0.000700356 | 0.000313751 | 4 |
| BP | GO:0071230 | 4/71 | 68/18670  | 0.000130129 | 0.000700356 | 0.000313751 | 4 |
| BP | GO:0050890 | 7/71 | 296/18670 | 0.000131012 | 0.00070398  | 0.000315375 | 7 |
| BP | GO:0071482 | 5/71 | 129/18670 | 0.00013167  | 0.000706382 | 0.000316451 | 5 |
| BP | GO:0002064 | 6/71 | 207/18670 | 0.000135853 | 0.000727662 | 0.000325984 | 6 |
| BP | GO:0070227 | 4/71 | 69/18670  | 0.000137742 | 0.000736601 | 0.000329989 | 4 |
| BP | GO:0090276 | 6/71 | 208/18670 | 0.000139473 | 0.000744669 | 0.000333603 | 6 |
| BP | GO:0030183 | 5/71 | 131/18670 | 0.000141537 | 0.000753292 | 0.000337466 | 5 |
| BP | GO:0098754 | 5/71 | 131/18670 | 0.000141537 | 0.000753292 | 0.000337466 | 5 |
| BP | GO:0006164 | 7/71 | 300/18670 | 0.000142338 | 0.000756357 | 0.000338839 | 7 |
| BP | GO:0006006 | 6/71 | 209/18670 | 0.000143168 | 0.000757585 | 0.000339389 | 6 |
| BP | GO:0009651 | 3/71 | 27/18670  | 0.000144377 | 0.000757585 | 0.000339389 | 3 |
| BP | GO:0035902 | 3/71 | 27/18670  | 0.000144377 | 0.000757585 | 0.000339389 | 3 |
| BP | GO:0045932 | 3/71 | 27/18670  | 0.000144377 | 0.000757585 | 0.000339389 | 3 |
| BP | GO:0046885 | 3/71 | 27/18670  | 0.000144377 | 0.000757585 | 0.000339389 | 3 |
| BP | GO:0048143 | 3/71 | 27/18670  | 0.000144377 | 0.000757585 | 0.000339389 | 3 |
| BP | GO:0071450 | 3/71 | 27/18670  | 0.000144377 | 0.000757585 | 0.000339389 | 3 |
| BP | GO:0071451 | 3/71 | 27/18670  | 0.000144377 | 0.000757585 | 0.000339389 | 3 |
| BP | GO:0043280 | 5/71 | 132/18670 | 0.000146678 | 0.000767258 | 0.000343723 | 5 |
| BP | GO:0045598 | 5/71 | 132/18670 | 0.000146678 | 0.000767258 | 0.000343723 | 5 |
| BP | GO:0097529 | 6/71 | 210/18670 | 0.000146941 | 0.000767434 | 0.000343802 | 6 |
| BP | GO:0042770 | 5/71 | 133/18670 | 0.000151961 | 0.00079242  | 0.000354995 | 5 |
| BP | GO:0071479 | 4/71 | 71/18670  | 0.000153928 | 0.000801432 | 0.000359032 | 4 |
| BP | GO:0060537 | 8/71 | 408/18670 | 0.000155194 | 0.000806767 | 0.000361422 | 8 |
| BP | GO:0030260 | 5/71 | 134/18670 | 0.000157389 | 0.000813135 | 0.000364275 | 5 |
| BP | GO:0044409 | 5/71 | 134/18670 | 0.000157389 | 0.000813135 | 0.000364275 | 5 |



|    |            |      |           |             |             |             |   |
|----|------------|------|-----------|-------------|-------------|-------------|---|
| BP | GO:0051806 | 5/71 | 134/18670 | 0.000157389 | 0.000813135 | 0.000364275 | 5 |
| BP | GO:0051828 | 5/71 | 134/18670 | 0.000157389 | 0.000813135 | 0.000364275 | 5 |
| BP | GO:1903747 | 4/71 | 72/18670  | 0.000162518 | 0.00083834  | 0.000375567 | 4 |
| BP | GO:0031100 | 4/71 | 73/18670  | 0.000171448 | 0.000878997 | 0.000393781 | 4 |
| BP | GO:0043627 | 4/71 | 73/18670  | 0.000171448 | 0.000878997 | 0.000393781 | 4 |
| BP | GO:0072401 | 4/71 | 73/18670  | 0.000171448 | 0.000878997 | 0.000393781 | 4 |
| BP | GO:0072422 | 4/71 | 73/18670  | 0.000171448 | 0.000878997 | 0.000393781 | 4 |
| BP | GO:0000303 | 3/71 | 29/18670  | 0.00017938  | 0.00091826  | 0.00041137  | 3 |
| BP | GO:0008584 | 5/71 | 138/18670 | 0.000180596 | 0.000920939 | 0.00041257  | 5 |
| BP | GO:0031670 | 4/71 | 74/18670  | 0.000180727 | 0.000920939 | 0.00041257  | 4 |
| BP | GO:0072395 | 4/71 | 74/18670  | 0.000180727 | 0.000920939 | 0.00041257  | 4 |
| BP | GO:0046879 | 7/71 | 312/18670 | 0.000181178 | 0.000921837 | 0.000412972 | 7 |
| BP | GO:0072522 | 7/71 | 313/18670 | 0.000184768 | 0.000938676 | 0.000420516 | 7 |
| BP | GO:0006720 | 5/71 | 139/18670 | 0.000186786 | 0.000946061 | 0.000423825 | 5 |
| BP | GO:0046546 | 5/71 | 139/18670 | 0.000186786 | 0.000946061 | 0.000423825 | 5 |
| BP | GO:1903201 | 4/71 | 75/18670  | 0.000190364 | 0.00096273  | 0.000431292 | 4 |
| BP | GO:0031098 | 7/71 | 315/18670 | 0.000192119 | 0.000970145 | 0.000434614 | 7 |
| BP | GO:0000305 | 3/71 | 30/18670  | 0.000198768 | 0.000994731 | 0.000445628 | 3 |
| BP | GO:0046320 | 3/71 | 30/18670  | 0.000198768 | 0.000994731 | 0.000445628 | 3 |
| BP | GO:0048147 | 3/71 | 30/18670  | 0.000198768 | 0.000994731 | 0.000445628 | 3 |
| BP | GO:0048873 | 3/71 | 30/18670  | 0.000198768 | 0.000994731 | 0.000445628 | 3 |
| BP | GO:0071549 | 3/71 | 30/18670  | 0.000198768 | 0.000994731 | 0.000445628 | 3 |
| BP | GO:0090200 | 3/71 | 30/18670  | 0.000198768 | 0.000994731 | 0.000445628 | 3 |
| BP | GO:0010675 | 5/71 | 142/18670 | 0.000206331 | 0.001029503 | 0.000461206 | 5 |
| BP | GO:1900542 | 5/71 | 142/18670 | 0.000206331 | 0.001029503 | 0.000461206 | 5 |
| BP | GO:0030595 | 6/71 | 224/18670 | 0.00020854  | 0.001038981 | 0.000465451 | 6 |
| BP | GO:0001649 | 6/71 | 225/18670 | 0.000213617 | 0.001062695 | 0.000476075 | 6 |
| BP | GO:0051047 | 8/71 | 428/18670 | 0.000214978 | 0.001067882 | 0.000478399 | 8 |
| BP | GO:0010543 | 3/71 | 31/18670  | 0.000219466 | 0.001083507 | 0.000485398 | 3 |
| BP | GO:0033198 | 3/71 | 31/18670  | 0.000219466 | 0.001083507 | 0.000485398 | 3 |
| BP | GO:0034694 | 3/71 | 31/18670  | 0.000219466 | 0.001083507 | 0.000485398 | 3 |
| BP | GO:0045742 | 3/71 | 31/18670  | 0.000219466 | 0.001083507 | 0.000485398 | 3 |
| BP | GO:0009914 | 7/71 | 322/18670 | 0.000219739 | 0.001083507 | 0.000485398 | 7 |
| BP | GO:1902107 | 5/71 | 144/18670 | 0.000220201 | 0.001084193 | 0.000485706 | 5 |
| BP | GO:0051054 | 6/71 | 228/18670 | 0.000229435 | 0.001127998 | 0.00050533  | 6 |
| BP | GO:0006110 | 4/71 | 79/18670  | 0.000232646 | 0.00114211  | 0.000511652 | 4 |
| BP | GO:0006140 | 5/71 | 146/18670 | 0.000234772 | 0.001150863 | 0.000515573 | 5 |
| BP | GO:0042391 | 8/71 | 434/18670 | 0.000236217 | 0.001156255 | 0.000517989 | 8 |
| BP | GO:0009743 | 6/71 | 230/18670 | 0.000240483 | 0.0011736   | 0.000525759 | 6 |
| BP | GO:0038128 | 3/71 | 32/18670  | 0.00024151  | 0.0011736   | 0.000525759 | 3 |
| BP | GO:0042311 | 3/71 | 32/18670  | 0.00024151  | 0.0011736   | 0.000525759 | 3 |
| BP | GO:0046685 | 3/71 | 32/18670  | 0.00024151  | 0.0011736   | 0.000525759 | 3 |
| BP | GO:0051968 | 3/71 | 32/18670  | 0.00024151  | 0.0011736   | 0.000525759 | 3 |
| BP | GO:0019359 | 5/71 | 147/18670 | 0.000242327 | 0.001174164 | 0.000526012 | 5 |
| BP | GO:0019363 | 5/71 | 147/18670 | 0.000242327 | 0.001174164 | 0.000526012 | 5 |
| BP | GO:0022617 | 4/71 | 80/18670  | 0.000244191 | 0.001181491 | 0.000529294 | 4 |
| BP | GO:0016485 | 7/71 | 328/18670 | 0.00024589  | 0.001187998 | 0.000532209 | 7 |
| BP | GO:0051592 | 5/71 | 148/18670 | 0.000250065 | 0.00120643  | 0.000540467 | 5 |
| BP | GO:0019932 | 8/71 | 439/18670 | 0.000255207 | 0.001229466 | 0.000550786 | 8 |
| BP | GO:0030811 | 4/71 | 81/18670  | 0.000256143 | 0.001230442 | 0.000551224 | 4 |
| BP | GO:1902930 | 4/71 | 81/18670  | 0.000256143 | 0.001230442 | 0.000551224 | 4 |
| BP | GO:0051092 | 5/71 | 149/18670 | 0.00025799  | 0.001235774 | 0.000553612 | 5 |
| BP | GO:2001056 | 5/71 | 149/18670 | 0.00025799  | 0.001235774 | 0.000553612 | 5 |
| BP | GO:0016242 | 3/71 | 33/18670  | 0.000264938 | 0.00126364  | 0.000566096 | 3 |
| BP | GO:0036003 | 3/71 | 33/18670  | 0.000264938 | 0.00126364  | 0.000566096 | 3 |
| BP | GO:1901186 | 3/71 | 33/18670  | 0.000264938 | 0.00126364  | 0.000566096 | 3 |
| BP | GO:0072525 | 5/71 | 150/18670 | 0.000266105 | 0.001267401 | 0.000567781 | 5 |
| BP | GO:0071158 | 4/71 | 82/18670  | 0.00026851  | 0.001277043 | 0.0005721   | 4 |
| BP | GO:0032872 | 6/71 | 237/18670 | 0.000282496 | 0.001341657 | 0.000601047 | 6 |
| BP | GO:0090316 | 5/71 | 153/18670 | 0.000291617 | 0.001383015 | 0.000619575 | 5 |
| BP | GO:0010507 | 4/71 | 84/18670  | 0.000294523 | 0.001386988 | 0.000621354 | 4 |
| BP | GO:0043154 | 4/71 | 84/18670  | 0.000294523 | 0.001386988 | 0.000621354 | 4 |
| BP | GO:0045445 | 4/71 | 84/18670  | 0.000294523 | 0.001386988 | 0.000621354 | 4 |

|    |            |      |           |             |             |             |   |
|----|------------|------|-----------|-------------|-------------|-------------|---|
| BP | GO:0046889 | 4/71 | 84/18670  | 0.000294523 | 0.001386988 | 0.000621354 | 4 |
| BP | GO:1905897 | 4/71 | 84/18670  | 0.000294523 | 0.001386988 | 0.000621354 | 4 |
| BP | GO:0031348 | 6/71 | 239/18670 | 0.000295501 | 0.001387698 | 0.000621673 | 6 |
| BP | GO:0070302 | 6/71 | 239/18670 | 0.000295501 | 0.001387698 | 0.000621673 | 6 |
| BP | GO:0030217 | 6/71 | 240/18670 | 0.000302178 | 0.001417068 | 0.00063483  | 6 |
| BP | GO:0030262 | 3/71 | 35/18670  | 0.000316093 | 0.001474073 | 0.000660368 | 3 |
| BP | GO:0032735 | 3/71 | 35/18670  | 0.000316093 | 0.001474073 | 0.000660368 | 3 |
| BP | GO:0071312 | 3/71 | 35/18670  | 0.000316093 | 0.001474073 | 0.000660368 | 3 |
| BP | GO:1904031 | 3/71 | 35/18670  | 0.000316093 | 0.001474073 | 0.000660368 | 3 |
| BP | GO:0030856 | 5/71 | 156/18670 | 0.000318945 | 0.001485308 | 0.000665401 | 5 |
| BP | GO:0034637 | 4/71 | 86/18670  | 0.000322297 | 0.001493043 | 0.000668866 | 4 |
| BP | GO:0042058 | 4/71 | 86/18670  | 0.000322297 | 0.001493043 | 0.000668866 | 4 |
| BP | GO:0042446 | 4/71 | 86/18670  | 0.000322297 | 0.001493043 | 0.000668866 | 4 |
| BP | GO:0006913 | 7/71 | 343/18670 | 0.000322387 | 0.001493043 | 0.000668866 | 7 |
| BP | GO:0010721 | 7/71 | 344/18670 | 0.000328098 | 0.001517034 | 0.000679614 | 7 |
| BP | GO:0031570 | 5/71 | 157/18670 | 0.000328472 | 0.001517034 | 0.000679614 | 5 |
| BP | GO:0051896 | 6/71 | 244/18670 | 0.00033008  | 0.001522363 | 0.000682001 | 6 |
| BP | GO:0002690 | 4/71 | 87/18670  | 0.000336865 | 0.001549395 | 0.000694111 | 4 |
| BP | GO:0014068 | 4/71 | 87/18670  | 0.000336865 | 0.001549395 | 0.000694111 | 4 |
| BP | GO:0060402 | 5/71 | 158/18670 | 0.000338213 | 0.001553466 | 0.000695935 | 5 |
| BP | GO:0051169 | 7/71 | 346/18670 | 0.000339764 | 0.001558453 | 0.000698169 | 7 |
| BP | GO:0042554 | 3/71 | 36/18670  | 0.00034389  | 0.001575225 | 0.000705683 | 3 |
| BP | GO:0034103 | 4/71 | 88/18670  | 0.0003519   | 0.001603152 | 0.000718193 | 4 |
| BP | GO:0043470 | 4/71 | 88/18670  | 0.0003519   | 0.001603152 | 0.000718193 | 4 |
| BP | GO:0070098 | 4/71 | 88/18670  | 0.0003519   | 0.001603152 | 0.000718193 | 4 |
| BP | GO:1900407 | 4/71 | 88/18670  | 0.0003519   | 0.001603152 | 0.000718193 | 4 |
| BP | GO:0007178 | 7/71 | 349/18670 | 0.000357886 | 0.001628121 | 0.00072938  | 7 |
| BP | GO:0046661 | 5/71 | 160/18670 | 0.000358352 | 0.001628121 | 0.00072938  | 5 |
| BP | GO:0071560 | 6/71 | 249/18670 | 0.000367758 | 0.001668595 | 0.000747511 | 6 |
| BP | GO:0006921 | 3/71 | 37/18670  | 0.000373216 | 0.001675226 | 0.000750482 | 3 |
| BP | GO:0014037 | 3/71 | 37/18670  | 0.000373216 | 0.001675226 | 0.000750482 | 3 |
| BP | GO:0014912 | 3/71 | 37/18670  | 0.000373216 | 0.001675226 | 0.000750482 | 3 |
| BP | GO:0030212 | 3/71 | 37/18670  | 0.000373216 | 0.001675226 | 0.000750482 | 3 |
| BP | GO:0032885 | 3/71 | 37/18670  | 0.000373216 | 0.001675226 | 0.000750482 | 3 |
| BP | GO:0033280 | 3/71 | 37/18670  | 0.000373216 | 0.001675226 | 0.000750482 | 3 |
| BP | GO:0042307 | 3/71 | 37/18670  | 0.000373216 | 0.001675226 | 0.000750482 | 3 |
| BP | GO:0046006 | 3/71 | 37/18670  | 0.000373216 | 0.001675226 | 0.000750482 | 3 |
| BP | GO:0003012 | 8/71 | 465/18670 | 0.000375284 | 0.001681792 | 0.000753423 | 8 |
| BP | GO:0030072 | 6/71 | 250/18670 | 0.000375682 | 0.001681792 | 0.000753423 | 6 |
| BP | GO:0042475 | 4/71 | 90/18670  | 0.000383401 | 0.001711009 | 0.000766512 | 4 |
| BP | GO:0071674 | 4/71 | 90/18670  | 0.000383401 | 0.001711009 | 0.000766512 | 4 |
| BP | GO:0045637 | 6/71 | 251/18670 | 0.00038374  | 0.001711009 | 0.000766512 | 6 |
| BP | GO:0031589 | 7/71 | 354/18670 | 0.00038981  | 0.001735765 | 0.000777603 | 7 |
| BP | GO:1901992 | 4/71 | 91/18670  | 0.000399885 | 0.001778268 | 0.000796643 | 4 |
| BP | GO:0035821 | 5/71 | 164/18670 | 0.00040134  | 0.001782374 | 0.000798483 | 5 |
| BP | GO:0006959 | 7/71 | 356/18670 | 0.000403201 | 0.001782845 | 0.000798694 | 7 |
| BP | GO:0032094 | 3/71 | 38/18670  | 0.000404104 | 0.001782845 | 0.000798694 | 3 |
| BP | GO:0032350 | 3/71 | 38/18670  | 0.000404104 | 0.001782845 | 0.000798694 | 3 |
| BP | GO:0048009 | 3/71 | 38/18670  | 0.000404104 | 0.001782845 | 0.000798694 | 3 |
| BP | GO:1904706 | 3/71 | 38/18670  | 0.000404104 | 0.001782845 | 0.000798694 | 3 |
| BP | GO:0071695 | 5/71 | 165/18670 | 0.000412671 | 0.001818245 | 0.000814553 | 5 |
| BP | GO:0050708 | 8/71 | 472/18670 | 0.000414486 | 0.001823845 | 0.000817062 | 8 |
| BP | GO:2000117 | 4/71 | 92/18670  | 0.000416869 | 0.001831567 | 0.000820521 | 4 |
| BP | GO:0071559 | 6/71 | 255/18670 | 0.000417333 | 0.001831567 | 0.000820521 | 6 |
| BP | GO:0016125 | 5/71 | 166/18670 | 0.000424242 | 0.001859453 | 0.000833014 | 5 |
| BP | GO:1903706 | 8/71 | 475/18670 | 0.000432278 | 0.001892204 | 0.000847685 | 8 |
| BP | GO:0003073 | 4/71 | 93/18670  | 0.000434363 | 0.001896378 | 0.000849556 | 4 |
| BP | GO:1901184 | 4/71 | 93/18670  | 0.000434363 | 0.001896378 | 0.000849556 | 4 |
| BP | GO:0010661 | 3/71 | 39/18670  | 0.00043659  | 0.001901149 | 0.000851693 | 3 |
| BP | GO:1904591 | 3/71 | 39/18670  | 0.00043659  | 0.001901149 | 0.000851693 | 3 |
| BP | GO:0010948 | 7/71 | 361/18670 | 0.000438299 | 0.001906118 | 0.000853919 | 7 |
| BP | GO:0001654 | 7/71 | 362/18670 | 0.000445604 | 0.001935374 | 0.000867025 | 7 |
| BP | GO:0050806 | 5/71 | 168/18670 | 0.000448117 | 0.001943772 | 0.000870788 | 5 |

|    |            |      |           |             |             |             |   |
|----|------------|------|-----------|-------------|-------------|-------------|---|
| BP | GO:0090257 | 6/71 | 259/18670 | 0.000453185 | 0.001963214 | 0.000879497 | 6 |
| BP | GO:0051281 | 3/71 | 40/18670  | 0.000470706 | 0.002029524 | 0.000909203 | 3 |
| BP | GO:0071548 | 3/71 | 40/18670  | 0.000470706 | 0.002029524 | 0.000909203 | 3 |
| BP | GO:0050810 | 4/71 | 95/18670  | 0.000470913 | 0.002029524 | 0.000909203 | 4 |
| BP | GO:0051196 | 4/71 | 95/18670  | 0.000470913 | 0.002029524 | 0.000909203 | 4 |
| BP | GO:0009108 | 6/71 | 261/18670 | 0.00047199  | 0.002031555 | 0.000910113 | 6 |
| BP | GO:0150063 | 7/71 | 366/18670 | 0.000475802 | 0.002045341 | 0.000916289 | 7 |
| BP | GO:0060401 | 5/71 | 171/18670 | 0.000485814 | 0.002085704 | 0.000934371 | 5 |
| BP | GO:0010660 | 4/71 | 96/18670  | 0.000489986 | 0.002095566 | 0.000938789 | 4 |
| BP | GO:0097327 | 4/71 | 96/18670  | 0.000489986 | 0.002095566 | 0.000938789 | 4 |
| BP | GO:2001169 | 4/71 | 96/18670  | 0.000489986 | 0.002095566 | 0.000938789 | 4 |
| BP | GO:0021543 | 5/71 | 172/18670 | 0.000498896 | 0.002130854 | 0.000954598 | 5 |
| BP | GO:0006909 | 7/71 | 369/18670 | 0.000499508 | 0.002130854 | 0.000954598 | 7 |
| BP | GO:0031330 | 6/71 | 264/18670 | 0.000501334 | 0.002135926 | 0.00095687  | 6 |
| BP | GO:0042572 | 3/71 | 41/18670  | 0.000506487 | 0.002138552 | 0.000958047 | 3 |
| BP | GO:0050798 | 3/71 | 41/18670  | 0.000506487 | 0.002138552 | 0.000958047 | 3 |
| BP | GO:0050873 | 3/71 | 41/18670  | 0.000506487 | 0.002138552 | 0.000958047 | 3 |
| BP | GO:0150077 | 3/71 | 41/18670  | 0.000506487 | 0.002138552 | 0.000958047 | 3 |
| BP | GO:1900117 | 3/71 | 41/18670  | 0.000506487 | 0.002138552 | 0.000958047 | 3 |
| BP | GO:1903053 | 3/71 | 41/18670  | 0.000506487 | 0.002138552 | 0.000958047 | 3 |
| BP | GO:0043255 | 4/71 | 97/18670  | 0.000509604 | 0.002138552 | 0.000958047 | 4 |
| BP | GO:0044773 | 4/71 | 97/18670  | 0.000509604 | 0.002138552 | 0.000958047 | 4 |
| BP | GO:0051591 | 4/71 | 97/18670  | 0.000509604 | 0.002138552 | 0.000958047 | 4 |
| BP | GO:1902882 | 4/71 | 97/18670  | 0.000509604 | 0.002138552 | 0.000958047 | 4 |
| BP | GO:1990868 | 4/71 | 97/18670  | 0.000509604 | 0.002138552 | 0.000958047 | 4 |
| BP | GO:1990869 | 4/71 | 97/18670  | 0.000509604 | 0.002138552 | 0.000958047 | 4 |
| BP | GO:0010469 | 5/71 | 173/18670 | 0.000512241 | 0.002146932 | 0.000961801 | 5 |
| BP | GO:0048880 | 7/71 | 371/18670 | 0.00051583  | 0.002159272 | 0.000967329 | 7 |
| BP | GO:0072331 | 6/71 | 267/18670 | 0.000532083 | 0.002224532 | 0.000996565 | 6 |
| BP | GO:0046165 | 5/71 | 175/18670 | 0.000539737 | 0.002253722 | 0.001009641 | 5 |
| BP | GO:0022898 | 6/71 | 268/18670 | 0.000542653 | 0.002260117 | 0.001012506 | 6 |
| BP | GO:0050714 | 6/71 | 268/18670 | 0.000542653 | 0.002260117 | 0.001012506 | 6 |
| BP | GO:0010907 | 3/71 | 42/18670  | 0.000543965 | 0.002260117 | 0.001012506 | 3 |
| BP | GO:0042149 | 3/71 | 42/18670  | 0.000543965 | 0.002260117 | 0.001012506 | 3 |
| BP | GO:0019395 | 4/71 | 99/18670  | 0.000550508 | 0.002284473 | 0.001023417 | 4 |
| BP | GO:0050796 | 5/71 | 176/18670 | 0.000553894 | 0.002292849 | 0.00102717  | 5 |
| BP | GO:0051897 | 5/71 | 176/18670 | 0.000553894 | 0.002292849 | 0.00102717  | 5 |
| BP | GO:0045165 | 6/71 | 270/18670 | 0.000564283 | 0.002332972 | 0.001045144 | 6 |
| BP | GO:0001959 | 5/71 | 177/18670 | 0.000568329 | 0.002346807 | 0.001051342 | 5 |
| BP | GO:0010657 | 4/71 | 100/18670 | 0.000571812 | 0.002358284 | 0.001056484 | 4 |
| BP | GO:1901617 | 6/71 | 271/18670 | 0.000575346 | 0.002369946 | 0.001061709 | 6 |
| BP | GO:0010950 | 5/71 | 178/18670 | 0.000583045 | 0.002387523 | 0.001069583 | 5 |
| BP | GO:2001257 | 5/71 | 178/18670 | 0.000583045 | 0.002387523 | 0.001069583 | 5 |
| BP | GO:0032459 | 3/71 | 43/18670  | 0.000583174 | 0.002387523 | 0.001069583 | 3 |
| BP | GO:0032881 | 3/71 | 43/18670  | 0.000583174 | 0.002387523 | 0.001069583 | 3 |
| BP | GO:1904646 | 3/71 | 43/18670  | 0.000583174 | 0.002387523 | 0.001069583 | 3 |
| BP | GO:0032611 | 4/71 | 101/18670 | 0.000593695 | 0.002424677 | 0.001086227 | 4 |
| BP | GO:0034440 | 4/71 | 101/18670 | 0.000593695 | 0.002424677 | 0.001086227 | 4 |
| BP | GO:0042176 | 7/71 | 381/18670 | 0.000603946 | 0.002463542 | 0.001103638 | 7 |
| BP | GO:0002791 | 8/71 | 500/18670 | 0.00060614  | 0.002469485 | 0.001106301 | 8 |
| BP | GO:0000079 | 4/71 | 102/18670 | 0.000616167 | 0.002504252 | 0.001121876 | 4 |
| BP | GO:0098869 | 4/71 | 102/18670 | 0.000616167 | 0.002504252 | 0.001121876 | 4 |
| BP | GO:0014002 | 3/71 | 44/18670  | 0.000624145 | 0.002521394 | 0.001129556 | 3 |
| BP | GO:0030225 | 3/71 | 44/18670  | 0.000624145 | 0.002521394 | 0.001129556 | 3 |
| BP | GO:0032965 | 3/71 | 44/18670  | 0.000624145 | 0.002521394 | 0.001129556 | 3 |
| BP | GO:0034105 | 3/71 | 44/18670  | 0.000624145 | 0.002521394 | 0.001129556 | 3 |
| BP | GO:0070266 | 3/71 | 44/18670  | 0.000624145 | 0.002521394 | 0.001129556 | 3 |
| BP | GO:0033483 | 2/71 | 10/18670  | 0.000629129 | 0.002535421 | 0.001135839 | 2 |
| BP | GO:1903800 | 2/71 | 10/18670  | 0.000629129 | 0.002535421 | 0.001135839 | 2 |
| BP | GO:0042692 | 7/71 | 385/18670 | 0.000642382 | 0.002585721 | 0.001158373 | 7 |
| BP | GO:0001523 | 4/71 | 104/18670 | 0.000662912 | 0.002661968 | 0.001192531 | 4 |
| BP | GO:0030593 | 4/71 | 104/18670 | 0.000662912 | 0.002661968 | 0.001192531 | 4 |
| BP | GO:0032570 | 3/71 | 45/18670  | 0.00066691  | 0.002668437 | 0.001195429 | 3 |

|    |            |      |           |             |             |             |   |
|----|------------|------|-----------|-------------|-------------|-------------|---|
| BP | GO:0042771 | 3/71 | 45/18670  | 0.00066691  | 0.002668437 | 0.001195429 | 3 |
| BP | GO:0048538 | 3/71 | 45/18670  | 0.00066691  | 0.002668437 | 0.001195429 | 3 |
| BP | GO:0043401 | 5/71 | 184/18670 | 0.00067744  | 0.002704113 | 0.001211411 | 5 |
| BP | GO:0048639 | 5/71 | 184/18670 | 0.00067744  | 0.002704113 | 0.001211411 | 5 |
| BP | GO:0009152 | 6/71 | 280/18670 | 0.000682699 | 0.002718634 | 0.001217917 | 6 |
| BP | GO:0030522 | 6/71 | 280/18670 | 0.000682699 | 0.002718634 | 0.001217917 | 6 |
| BP | GO:0007009 | 4/71 | 105/18670 | 0.000687203 | 0.002733323 | 0.001224497 | 4 |
| BP | GO:0014706 | 7/71 | 390/18670 | 0.000693137 | 0.002753661 | 0.001233608 | 7 |
| BP | GO:0046328 | 5/71 | 185/18670 | 0.000694222 | 0.002754706 | 0.001234076 | 5 |
| BP | GO:0010883 | 3/71 | 46/18670  | 0.000711501 | 0.002792668 | 0.001251083 | 3 |
| BP | GO:0022602 | 3/71 | 46/18670  | 0.000711501 | 0.002792668 | 0.001251083 | 3 |
| BP | GO:0030810 | 3/71 | 46/18670  | 0.000711501 | 0.002792668 | 0.001251083 | 3 |
| BP | GO:0033628 | 3/71 | 46/18670  | 0.000711501 | 0.002792668 | 0.001251083 | 3 |
| BP | GO:0060443 | 3/71 | 46/18670  | 0.000711501 | 0.002792668 | 0.001251083 | 3 |
| BP | GO:0060711 | 3/71 | 46/18670  | 0.000711501 | 0.002792668 | 0.001251083 | 3 |
| BP | GO:1900373 | 3/71 | 46/18670  | 0.000711501 | 0.002792668 | 0.001251083 | 3 |
| BP | GO:1904036 | 3/71 | 46/18670  | 0.000711501 | 0.002792668 | 0.001251083 | 3 |
| BP | GO:1901989 | 4/71 | 106/18670 | 0.000712118 | 0.002792668 | 0.001251083 | 4 |
| BP | GO:1904029 | 4/71 | 106/18670 | 0.000712118 | 0.002792668 | 0.001251083 | 4 |
| BP | GO:0031647 | 6/71 | 284/18670 | 0.000735126 | 0.002879528 | 0.001289995 | 6 |
| BP | GO:0030330 | 4/71 | 107/18670 | 0.000737666 | 0.002882744 | 0.001291436 | 4 |
| BP | GO:0062014 | 4/71 | 107/18670 | 0.000737666 | 0.002882744 | 0.001291436 | 4 |
| BP | GO:0030574 | 3/71 | 47/18670  | 0.000757949 | 0.00294605  | 0.001319797 | 3 |
| BP | GO:0070849 | 3/71 | 47/18670  | 0.000757949 | 0.00294605  | 0.001319797 | 3 |
| BP | GO:0051403 | 6/71 | 286/18670 | 0.000762482 | 0.00294605  | 0.001319797 | 6 |
| BP | GO:0071156 | 4/71 | 108/18670 | 0.000763856 | 0.00294605  | 0.001319797 | 4 |
| BP | GO:1904659 | 4/71 | 108/18670 | 0.000763856 | 0.00294605  | 0.001319797 | 4 |
| BP | GO:0019362 | 5/71 | 189/18670 | 0.000764485 | 0.00294605  | 0.001319797 | 5 |
| BP | GO:0046496 | 5/71 | 189/18670 | 0.000764485 | 0.00294605  | 0.001319797 | 5 |
| BP | GO:0031652 | 2/71 | 11/18670  | 0.000767045 | 0.00294605  | 0.001319797 | 2 |
| BP | GO:0033629 | 2/71 | 11/18670  | 0.000767045 | 0.00294605  | 0.001319797 | 2 |
| BP | GO:0043619 | 2/71 | 11/18670  | 0.000767045 | 0.00294605  | 0.001319797 | 2 |
| BP | GO:0051974 | 2/71 | 11/18670  | 0.000767045 | 0.00294605  | 0.001319797 | 2 |
| BP | GO:0072584 | 2/71 | 11/18670  | 0.000767045 | 0.00294605  | 0.001319797 | 2 |
| BP | GO:0072683 | 2/71 | 11/18670  | 0.000767045 | 0.00294605  | 0.001319797 | 2 |
| BP | GO:1990440 | 2/71 | 11/18670  | 0.000767045 | 0.00294605  | 0.001319797 | 2 |
| BP | GO:2001269 | 2/71 | 11/18670  | 0.000767045 | 0.00294605  | 0.001319797 | 2 |
| BP | GO:0051604 | 7/71 | 397/18670 | 0.000769497 | 0.002952087 | 0.001322501 | 7 |
| BP | GO:0060759 | 5/71 | 190/18670 | 0.000782852 | 0.00299989  | 0.001343916 | 5 |
| BP | GO:0002793 | 6/71 | 288/18670 | 0.000790621 | 0.003026201 | 0.001355703 | 6 |
| BP | GO:1903532 | 7/71 | 399/18670 | 0.000792496 | 0.00302992  | 0.001357369 | 7 |
| BP | GO:0006939 | 4/71 | 110/18670 | 0.000818199 | 0.003121071 | 0.001398204 | 4 |
| BP | GO:0033559 | 4/71 | 110/18670 | 0.000818199 | 0.003121071 | 0.001398204 | 4 |
| BP | GO:0072676 | 4/71 | 111/18670 | 0.000846369 | 0.00322486  | 0.0014447   | 4 |
| BP | GO:0090287 | 6/71 | 292/18670 | 0.000849306 | 0.003232375 | 0.001448066 | 6 |
| BP | GO:0002686 | 3/71 | 49/18670  | 0.000856536 | 0.003237843 | 0.001450516 | 3 |
| BP | GO:0010712 | 3/71 | 49/18670  | 0.000856536 | 0.003237843 | 0.001450516 | 3 |
| BP | GO:0030857 | 3/71 | 49/18670  | 0.000856536 | 0.003237843 | 0.001450516 | 3 |
| BP | GO:0048546 | 3/71 | 49/18670  | 0.000856536 | 0.003237843 | 0.001450516 | 3 |
| BP | GO:1904707 | 3/71 | 49/18670  | 0.000856536 | 0.003237843 | 0.001450516 | 3 |
| BP | GO:1990090 | 3/71 | 49/18670  | 0.000856536 | 0.003237843 | 0.001450516 | 3 |
| BP | GO:0009260 | 6/71 | 293/18670 | 0.00086449  | 0.003261656 | 0.001461184 | 6 |
| BP | GO:0043900 | 7/71 | 405/18670 | 0.000864782 | 0.003261656 | 0.001461184 | 7 |
| BP | GO:0002065 | 4/71 | 112/18670 | 0.000875218 | 0.003286232 | 0.001472194 | 4 |
| BP | GO:0008645 | 4/71 | 112/18670 | 0.000875218 | 0.003286232 | 0.001472194 | 4 |
| BP | GO:0032411 | 4/71 | 112/18670 | 0.000875218 | 0.003286232 | 0.001472194 | 4 |
| BP | GO:0051817 | 4/71 | 112/18670 | 0.000875218 | 0.003286232 | 0.001472194 | 4 |
| BP | GO:0072524 | 5/71 | 195/18670 | 0.000879683 | 0.003299303 | 0.001478049 | 5 |
| BP | GO:0016236 | 6/71 | 295/18670 | 0.000895486 | 0.003354822 | 0.001502922 | 6 |
| BP | GO:0006694 | 5/71 | 196/18670 | 0.000900074 | 0.003364491 | 0.001507253 | 5 |
| BP | GO:0071897 | 5/71 | 196/18670 | 0.000900074 | 0.003364491 | 0.001507253 | 5 |
| BP | GO:0046620 | 4/71 | 113/18670 | 0.000904753 | 0.003374458 | 0.001511718 | 4 |
| BP | GO:0048640 | 4/71 | 113/18670 | 0.000904753 | 0.003374458 | 0.001511718 | 4 |

|    |            |      |           |             |             |             |   |
|----|------------|------|-----------|-------------|-------------|-------------|---|
| BP | GO:1900087 | 3/71 | 50/18670  | 0.000908736 | 0.003383182 | 0.001515627 | 3 |
| BP | GO:0006983 | 2/71 | 12/18670  | 0.000918191 | 0.003383182 | 0.001515627 | 2 |
| BP | GO:0010889 | 2/71 | 12/18670  | 0.000918191 | 0.003383182 | 0.001515627 | 2 |
| BP | GO:0031392 | 2/71 | 12/18670  | 0.000918191 | 0.003383182 | 0.001515627 | 2 |
| BP | GO:0042368 | 2/71 | 12/18670  | 0.000918191 | 0.003383182 | 0.001515627 | 2 |
| BP | GO:0051549 | 2/71 | 12/18670  | 0.000918191 | 0.003383182 | 0.001515627 | 2 |
| BP | GO:0070243 | 2/71 | 12/18670  | 0.000918191 | 0.003383182 | 0.001515627 | 2 |
| BP | GO:0070486 | 2/71 | 12/18670  | 0.000918191 | 0.003383182 | 0.001515627 | 2 |
| BP | GO:0097284 | 2/71 | 12/18670  | 0.000918191 | 0.003383182 | 0.001515627 | 2 |
| BP | GO:1900402 | 2/71 | 12/18670  | 0.000918191 | 0.003383182 | 0.001515627 | 2 |
| BP | GO:1903894 | 2/71 | 12/18670  | 0.000918191 | 0.003383182 | 0.001515627 | 2 |
| BP | GO:1903522 | 6/71 | 297/18670 | 0.000927335 | 0.003413121 | 0.001529039 | 6 |
| BP | GO:0015749 | 4/71 | 114/18670 | 0.000934985 | 0.003433738 | 0.001538275 | 4 |
| BP | GO:0042752 | 4/71 | 114/18670 | 0.000934985 | 0.003433738 | 0.001538275 | 4 |
| BP | GO:0019369 | 3/71 | 51/18670  | 0.000962912 | 0.003528571 | 0.001580759 | 3 |
| BP | GO:0031103 | 3/71 | 51/18670  | 0.000962912 | 0.003528571 | 0.001580759 | 3 |
| BP | GO:0006096 | 4/71 | 115/18670 | 0.000965921 | 0.003531878 | 0.001582241 | 4 |
| BP | GO:0032612 | 4/71 | 115/18670 | 0.000965921 | 0.003531878 | 0.001582241 | 4 |
| BP | GO:0046390 | 6/71 | 300/18670 | 0.000976738 | 0.003567542 | 0.001598217 | 6 |
| BP | GO:0006757 | 4/71 | 116/18670 | 0.000997571 | 0.003631765 | 0.001626989 | 4 |
| BP | GO:0021987 | 4/71 | 116/18670 | 0.000997571 | 0.003631765 | 0.001626989 | 4 |
| BP | GO:0034219 | 4/71 | 116/18670 | 0.000997571 | 0.003631765 | 0.001626989 | 4 |
| BP | GO:0032731 | 3/71 | 52/18670  | 0.001019093 | 0.003702078 | 0.001658488 | 3 |
| BP | GO:1990089 | 3/71 | 52/18670  | 0.001019093 | 0.003702078 | 0.001658488 | 3 |
| BP | GO:0009746 | 5/71 | 202/18670 | 0.001029913 | 0.003733409 | 0.001672524 | 5 |
| BP | GO:0010508 | 4/71 | 117/18670 | 0.001029944 | 0.003733409 | 0.001672524 | 4 |
| BP | GO:1990266 | 4/71 | 118/18670 | 0.001063049 | 0.003849249 | 0.001724419 | 4 |
| BP | GO:0031396 | 5/71 | 204/18670 | 0.001076139 | 0.003852991 | 0.001726095 | 5 |
| BP | GO:0031638 | 3/71 | 53/18670  | 0.001077308 | 0.003852991 | 0.001726095 | 3 |
| BP | GO:0032964 | 3/71 | 53/18670  | 0.001077308 | 0.003852991 | 0.001726095 | 3 |
| BP | GO:0045661 | 3/71 | 53/18670  | 0.001077308 | 0.003852991 | 0.001726095 | 3 |
| BP | GO:0070228 | 3/71 | 53/18670  | 0.001077308 | 0.003852991 | 0.001726095 | 3 |
| BP | GO:0010745 | 2/71 | 13/18670  | 0.001082469 | 0.003852991 | 0.001726095 | 2 |
| BP | GO:0010870 | 2/71 | 13/18670  | 0.001082469 | 0.003852991 | 0.001726095 | 2 |
| BP | GO:0030656 | 2/71 | 13/18670  | 0.001082469 | 0.003852991 | 0.001726095 | 2 |
| BP | GO:0031650 | 2/71 | 13/18670  | 0.001082469 | 0.003852991 | 0.001726095 | 2 |
| BP | GO:0031953 | 2/71 | 13/18670  | 0.001082469 | 0.003852991 | 0.001726095 | 2 |
| BP | GO:0042178 | 2/71 | 13/18670  | 0.001082469 | 0.003852991 | 0.001726095 | 2 |
| BP | GO:0043568 | 2/71 | 13/18670  | 0.001082469 | 0.003852991 | 0.001726095 | 2 |
| BP | GO:0045086 | 2/71 | 13/18670  | 0.001082469 | 0.003852991 | 0.001726095 | 2 |
| BP | GO:0060576 | 2/71 | 13/18670  | 0.001082469 | 0.003852991 | 0.001726095 | 2 |
| BP | GO:0061029 | 2/71 | 13/18670  | 0.001082469 | 0.003852991 | 0.001726095 | 2 |
| BP | GO:1902894 | 2/71 | 13/18670  | 0.001082469 | 0.003852991 | 0.001726095 | 2 |
| BP | GO:0007173 | 4/71 | 119/18670 | 0.001096895 | 0.003891947 | 0.001743547 | 4 |
| BP | GO:0042866 | 4/71 | 119/18670 | 0.001096895 | 0.003891947 | 0.001743547 | 4 |
| BP | GO:0051193 | 4/71 | 119/18670 | 0.001096895 | 0.003891947 | 0.001743547 | 4 |
| BP | GO:0032386 | 7/71 | 423/18670 | 0.001113403 | 0.003946343 | 0.001767916 | 7 |
| BP | GO:0030199 | 3/71 | 54/18670  | 0.001137585 | 0.004015075 | 0.001798707 | 3 |
| BP | GO:0032655 | 3/71 | 54/18670  | 0.001137585 | 0.004015075 | 0.001798707 | 3 |
| BP | GO:0043392 | 3/71 | 54/18670  | 0.001137585 | 0.004015075 | 0.001798707 | 3 |
| BP | GO:0050994 | 3/71 | 54/18670  | 0.001137585 | 0.004015075 | 0.001798707 | 3 |
| BP | GO:0006733 | 5/71 | 207/18670 | 0.001148345 | 0.004040295 | 0.001810005 | 5 |
| BP | GO:0030073 | 5/71 | 207/18670 | 0.001148345 | 0.004040295 | 0.001810005 | 5 |
| BP | GO:0034284 | 5/71 | 207/18670 | 0.001148345 | 0.004040295 | 0.001810005 | 5 |
| BP | GO:0030968 | 4/71 | 121/18670 | 0.001166846 | 0.004096791 | 0.001835315 | 4 |
| BP | GO:0046718 | 4/71 | 121/18670 | 0.001166846 | 0.004096791 | 0.001835315 | 4 |
| BP | GO:1990778 | 6/71 | 311/18670 | 0.001175456 | 0.004122703 | 0.001846923 | 6 |
| BP | GO:0010823 | 3/71 | 55/18670  | 0.001199951 | 0.004192885 | 0.001878364 | 3 |
| BP | GO:0042306 | 3/71 | 55/18670  | 0.001199951 | 0.004192885 | 0.001878364 | 3 |
| BP | GO:0019079 | 4/71 | 122/18670 | 0.001202969 | 0.004192885 | 0.001878364 | 4 |
| BP | GO:0034101 | 4/71 | 122/18670 | 0.001202969 | 0.004192885 | 0.001878364 | 4 |
| BP | GO:0043500 | 4/71 | 122/18670 | 0.001202969 | 0.004192885 | 0.001878364 | 4 |
| BP | GO:1903578 | 4/71 | 122/18670 | 0.001202969 | 0.004192885 | 0.001878364 | 4 |

|    |            |      |           |             |             |             |   |
|----|------------|------|-----------|-------------|-------------|-------------|---|
| BP | GO:0043010 | 6/71 | 314/18670 | 0.001234687 | 0.004298967 | 0.001925888 | 6 |
| BP | GO:0071621 | 4/71 | 123/18670 | 0.001239869 | 0.004312531 | 0.001931964 | 4 |
| BP | GO:0030213 | 2/71 | 14/18670  | 0.001259777 | 0.004350189 | 0.001948835 | 2 |
| BP | GO:0035810 | 2/71 | 14/18670  | 0.001259777 | 0.004350189 | 0.001948835 | 2 |
| BP | GO:0036295 | 2/71 | 14/18670  | 0.001259777 | 0.004350189 | 0.001948835 | 2 |
| BP | GO:0043374 | 2/71 | 14/18670  | 0.001259777 | 0.004350189 | 0.001948835 | 2 |
| BP | GO:0045651 | 2/71 | 14/18670  | 0.001259777 | 0.004350189 | 0.001948835 | 2 |
| BP | GO:0051547 | 2/71 | 14/18670  | 0.001259777 | 0.004350189 | 0.001948835 | 2 |
| BP | GO:2001279 | 2/71 | 14/18670  | 0.001259777 | 0.004350189 | 0.001948835 | 2 |
| BP | GO:0032615 | 3/71 | 56/18670  | 0.001264435 | 0.004352824 | 0.001950015 | 3 |
| BP | GO:1903078 | 3/71 | 56/18670  | 0.001264435 | 0.004352824 | 0.001950015 | 3 |
| BP | GO:1903202 | 3/71 | 56/18670  | 0.001264435 | 0.004352824 | 0.001950015 | 3 |
| BP | GO:0014013 | 4/71 | 124/18670 | 0.001277554 | 0.004388975 | 0.00196621  | 4 |
| BP | GO:0019218 | 4/71 | 124/18670 | 0.001277554 | 0.004388975 | 0.00196621  | 4 |
| BP | GO:0070371 | 6/71 | 317/18670 | 0.001296182 | 0.004448413 | 0.001992837 | 6 |
| BP | GO:0006805 | 4/71 | 125/18670 | 0.001316035 | 0.004511926 | 0.002021291 | 4 |
| BP | GO:0050804 | 7/71 | 436/18670 | 0.001325606 | 0.004517261 | 0.002023681 | 7 |
| BP | GO:0007254 | 5/71 | 214/18670 | 0.001330756 | 0.004517261 | 0.002023681 | 5 |
| BP | GO:0016051 | 5/71 | 214/18670 | 0.001330756 | 0.004517261 | 0.002023681 | 5 |
| BP | GO:0045732 | 5/71 | 214/18670 | 0.001330756 | 0.004517261 | 0.002023681 | 5 |
| BP | GO:2001020 | 5/71 | 214/18670 | 0.001330756 | 0.004517261 | 0.002023681 | 5 |
| BP | GO:0002066 | 3/71 | 57/18670  | 0.001331063 | 0.004517261 | 0.002023681 | 3 |
| BP | GO:0042743 | 3/71 | 57/18670  | 0.001331063 | 0.004517261 | 0.002023681 | 3 |
| BP | GO:0045981 | 3/71 | 57/18670  | 0.001331063 | 0.004517261 | 0.002023681 | 3 |
| BP | GO:1900408 | 3/71 | 57/18670  | 0.001331063 | 0.004517261 | 0.002023681 | 3 |
| BP | GO:1900544 | 3/71 | 57/18670  | 0.001331063 | 0.004517261 | 0.002023681 | 3 |
| BP | GO:0099177 | 7/71 | 437/18670 | 0.001343158 | 0.004553698 | 0.002040004 | 7 |
| BP | GO:0046031 | 4/71 | 126/18670 | 0.001355319 | 0.004590287 | 0.002056395 | 4 |
| BP | GO:0032388 | 5/71 | 215/18670 | 0.001358464 | 0.004596298 | 0.002059088 | 5 |
| BP | GO:0071375 | 6/71 | 321/18670 | 0.001381797 | 0.004670528 | 0.002092343 | 6 |
| BP | GO:0032869 | 5/71 | 216/18670 | 0.001386597 | 0.004682034 | 0.002097497 | 5 |
| BP | GO:0071385 | 3/71 | 58/18670  | 0.001399861 | 0.004712584 | 0.002111183 | 3 |
| BP | GO:0098930 | 3/71 | 58/18670  | 0.001399861 | 0.004712584 | 0.002111183 | 3 |
| BP | GO:1904589 | 3/71 | 58/18670  | 0.001399861 | 0.004712584 | 0.002111183 | 3 |
| BP | GO:0034763 | 4/71 | 128/18670 | 0.001436334 | 0.004828118 | 0.002162941 | 4 |
| BP | GO:0030812 | 2/71 | 15/18670  | 0.001450019 | 0.004828118 | 0.002162941 | 2 |
| BP | GO:0035635 | 2/71 | 15/18670  | 0.001450019 | 0.004828118 | 0.002162941 | 2 |
| BP | GO:0042362 | 2/71 | 15/18670  | 0.001450019 | 0.004828118 | 0.002162941 | 2 |
| BP | GO:0046321 | 2/71 | 15/18670  | 0.001450019 | 0.004828118 | 0.002162941 | 2 |
| BP | GO:0048070 | 2/71 | 15/18670  | 0.001450019 | 0.004828118 | 0.002162941 | 2 |
| BP | GO:0051044 | 2/71 | 15/18670  | 0.001450019 | 0.004828118 | 0.002162941 | 2 |
| BP | GO:0051198 | 2/71 | 15/18670  | 0.001450019 | 0.004828118 | 0.002162941 | 2 |
| BP | GO:0051770 | 2/71 | 15/18670  | 0.001450019 | 0.004828118 | 0.002162941 | 2 |
| BP | GO:1900119 | 2/71 | 15/18670  | 0.001450019 | 0.004828118 | 0.002162941 | 2 |
| BP | GO:2000402 | 2/71 | 15/18670  | 0.001450019 | 0.004828118 | 0.002162941 | 2 |
| BP | GO:0031102 | 3/71 | 59/18670  | 0.001470856 | 0.004882951 | 0.002187505 | 3 |
| BP | GO:0032732 | 3/71 | 59/18670  | 0.001470856 | 0.004882951 | 0.002187505 | 3 |
| BP | GO:1902883 | 3/71 | 59/18670  | 0.001470856 | 0.004882951 | 0.002187505 | 3 |
| BP | GO:0048762 | 5/71 | 219/18670 | 0.001473581 | 0.004887158 | 0.00218939  | 5 |
| BP | GO:0034754 | 4/71 | 129/18670 | 0.001478084 | 0.004892413 | 0.002191744 | 4 |
| BP | GO:1903038 | 4/71 | 129/18670 | 0.001478084 | 0.004892413 | 0.002191744 | 4 |
| BP | GO:0044282 | 7/71 | 445/18670 | 0.001490225 | 0.004927735 | 0.002207568 | 7 |
| BP | GO:1902808 | 3/71 | 60/18670  | 0.001544074 | 0.005100767 | 0.002285085 | 3 |
| BP | GO:0046887 | 4/71 | 131/18670 | 0.00156411  | 0.005158171 | 0.002310801 | 4 |
| BP | GO:0043903 | 5/71 | 222/18670 | 0.001564527 | 0.005158171 | 0.002310801 | 5 |
| BP | GO:0042476 | 4/71 | 132/18670 | 0.001608404 | 0.005297623 | 0.002373274 | 4 |
| BP | GO:0006879 | 3/71 | 61/18670  | 0.001619539 | 0.005308225 | 0.002378024 | 3 |
| BP | GO:0030888 | 3/71 | 61/18670  | 0.001619539 | 0.005308225 | 0.002378024 | 3 |
| BP | GO:0032370 | 3/71 | 61/18670  | 0.001619539 | 0.005308225 | 0.002378024 | 3 |
| BP | GO:0045123 | 3/71 | 61/18670  | 0.001619539 | 0.005308225 | 0.002378024 | 3 |
| BP | GO:0071384 | 3/71 | 61/18670  | 0.001619539 | 0.005308225 | 0.002378024 | 3 |
| BP | GO:0002070 | 2/71 | 16/18670  | 0.001653096 | 0.005381388 | 0.0024108   | 2 |
| BP | GO:0019372 | 2/71 | 16/18670  | 0.001653096 | 0.005381388 | 0.0024108   | 2 |

|    |            |      |           |             |             |             |   |
|----|------------|------|-----------|-------------|-------------|-------------|---|
| BP | GO:0043217 | 2/71 | 16/18670  | 0.001653096 | 0.005381388 | 0.0024108   | 2 |
| BP | GO:0060965 | 2/71 | 16/18670  | 0.001653096 | 0.005381388 | 0.0024108   | 2 |
| BP | GO:0070293 | 2/71 | 16/18670  | 0.001653096 | 0.005381388 | 0.0024108   | 2 |
| BP | GO:1902001 | 2/71 | 16/18670  | 0.001653096 | 0.005381388 | 0.0024108   | 2 |
| BP | GO:1902004 | 2/71 | 16/18670  | 0.001653096 | 0.005381388 | 0.0024108   | 2 |
| BP | GO:0007160 | 5/71 | 225/18670 | 0.001659545 | 0.005391914 | 0.002415515 | 5 |
| BP | GO:0033157 | 5/71 | 225/18670 | 0.001659545 | 0.005391914 | 0.002415515 | 5 |
| BP | GO:0015849 | 6/71 | 333/18670 | 0.001664777 | 0.005393234 | 0.002416107 | 6 |
| BP | GO:0016042 | 6/71 | 333/18670 | 0.001664777 | 0.005393234 | 0.002416107 | 6 |
| BP | GO:0046942 | 6/71 | 333/18670 | 0.001664777 | 0.005393234 | 0.002416107 | 6 |
| BP | GO:0010676 | 3/71 | 62/18670  | 0.001697278 | 0.005484855 | 0.002457152 | 3 |
| BP | GO:0045453 | 3/71 | 62/18670  | 0.001697278 | 0.005484855 | 0.002457152 | 3 |
| BP | GO:0006165 | 4/71 | 134/18670 | 0.001699602 | 0.005484855 | 0.002457152 | 4 |
| BP | GO:0006766 | 4/71 | 134/18670 | 0.001699602 | 0.005484855 | 0.002457152 | 4 |
| BP | GO:0001889 | 4/71 | 135/18670 | 0.001746522 | 0.005630854 | 0.002522557 | 4 |
| BP | GO:0043405 | 6/71 | 337/18670 | 0.001768284 | 0.005695538 | 0.002551535 | 6 |
| BP | GO:1904377 | 3/71 | 63/18670  | 0.001777314 | 0.005713647 | 0.002559648 | 3 |
| BP | GO:2000401 | 3/71 | 63/18670  | 0.001777314 | 0.005713647 | 0.002559648 | 3 |
| BP | GO:0007292 | 4/71 | 136/18670 | 0.001794335 | 0.005757326 | 0.002579216 | 4 |
| BP | GO:0046939 | 4/71 | 136/18670 | 0.001794335 | 0.005757326 | 0.002579216 | 4 |
| BP | GO:0023061 | 7/71 | 462/18670 | 0.001844518 | 0.005911748 | 0.002648395 | 7 |
| BP | GO:1900449 | 3/71 | 64/18670  | 0.001859672 | 0.005911748 | 0.002648395 | 3 |
| BP | GO:1903320 | 5/71 | 231/18670 | 0.001862233 | 0.005911748 | 0.002648395 | 5 |
| BP | GO:0002683 | 7/71 | 463/18670 | 0.001867235 | 0.005911748 | 0.002648395 | 7 |
| BP | GO:0006089 | 2/71 | 17/18670  | 0.001868909 | 0.005911748 | 0.002648395 | 2 |
| BP | GO:0006978 | 2/71 | 17/18670  | 0.001868909 | 0.005911748 | 0.002648395 | 2 |
| BP | GO:0010224 | 2/71 | 17/18670  | 0.001868909 | 0.005911748 | 0.002648395 | 2 |
| BP | GO:0032966 | 2/71 | 17/18670  | 0.001868909 | 0.005911748 | 0.002648395 | 2 |
| BP | GO:0045091 | 2/71 | 17/18670  | 0.001868909 | 0.005911748 | 0.002648395 | 2 |
| BP | GO:0045725 | 2/71 | 17/18670  | 0.001868909 | 0.005911748 | 0.002648395 | 2 |
| BP | GO:0050665 | 2/71 | 17/18670  | 0.001868909 | 0.005911748 | 0.002648395 | 2 |
| BP | GO:0060644 | 2/71 | 17/18670  | 0.001868909 | 0.005911748 | 0.002648395 | 2 |
| BP | GO:0061298 | 2/71 | 17/18670  | 0.001868909 | 0.005911748 | 0.002648395 | 2 |
| BP | GO:0071850 | 2/71 | 17/18670  | 0.001868909 | 0.005911748 | 0.002648395 | 2 |
| BP | GO:2000811 | 2/71 | 17/18670  | 0.001868909 | 0.005911748 | 0.002648395 | 2 |
| BP | GO:0009135 | 4/71 | 138/18670 | 0.001892676 | 0.005958818 | 0.002669482 | 4 |
| BP | GO:0009179 | 4/71 | 138/18670 | 0.001892676 | 0.005958818 | 0.002669482 | 4 |
| BP | GO:0009308 | 4/71 | 138/18670 | 0.001892676 | 0.005958818 | 0.002669482 | 4 |
| BP | GO:0046631 | 4/71 | 138/18670 | 0.001892676 | 0.005958818 | 0.002669482 | 4 |
| BP | GO:0061008 | 4/71 | 138/18670 | 0.001892676 | 0.005958818 | 0.002669482 | 4 |
| BP | GO:0033044 | 6/71 | 342/18670 | 0.001904472 | 0.005990333 | 0.0026836   | 6 |
| BP | GO:0051346 | 7/71 | 466/18670 | 0.001936696 | 0.006085981 | 0.002726449 | 7 |
| BP | GO:0072678 | 3/71 | 65/18670  | 0.001944377 | 0.006104396 | 0.002734699 | 3 |
| BP | GO:0009185 | 4/71 | 140/18670 | 0.001994693 | 0.006250661 | 0.002800224 | 4 |
| BP | GO:0034620 | 4/71 | 140/18670 | 0.001994693 | 0.006250661 | 0.002800224 | 4 |
| BP | GO:0009755 | 5/71 | 235/18670 | 0.002007083 | 0.006283613 | 0.002814986 | 5 |
| BP | GO:0097530 | 4/71 | 141/18670 | 0.002047103 | 0.006402927 | 0.002868437 | 4 |
| BP | GO:0043122 | 5/71 | 237/18670 | 0.002082524 | 0.00647556  | 0.002900976 | 5 |
| BP | GO:0010713 | 2/71 | 18/18670  | 0.002097363 | 0.00647556  | 0.002900976 | 2 |
| BP | GO:0031998 | 2/71 | 18/18670  | 0.002097363 | 0.00647556  | 0.002900976 | 2 |
| BP | GO:0035994 | 2/71 | 18/18670  | 0.002097363 | 0.00647556  | 0.002900976 | 2 |
| BP | GO:0039692 | 2/71 | 18/18670  | 0.002097363 | 0.00647556  | 0.002900976 | 2 |
| BP | GO:0042772 | 2/71 | 18/18670  | 0.002097363 | 0.00647556  | 0.002900976 | 2 |
| BP | GO:0045780 | 2/71 | 18/18670  | 0.002097363 | 0.00647556  | 0.002900976 | 2 |
| BP | GO:0046852 | 2/71 | 18/18670  | 0.002097363 | 0.00647556  | 0.002900976 | 2 |
| BP | GO:0060749 | 2/71 | 18/18670  | 0.002097363 | 0.00647556  | 0.002900976 | 2 |
| BP | GO:0061377 | 2/71 | 18/18670  | 0.002097363 | 0.00647556  | 0.002900976 | 2 |
| BP | GO:0070230 | 2/71 | 18/18670  | 0.002097363 | 0.00647556  | 0.002900976 | 2 |
| BP | GO:0070875 | 2/71 | 18/18670  | 0.002097363 | 0.00647556  | 0.002900976 | 2 |
| BP | GO:0071318 | 2/71 | 18/18670  | 0.002097363 | 0.00647556  | 0.002900976 | 2 |
| BP | GO:0090026 | 2/71 | 18/18670  | 0.002097363 | 0.00647556  | 0.002900976 | 2 |
| BP | GO:0030258 | 5/71 | 238/18670 | 0.002121013 | 0.006536541 | 0.002928295 | 5 |
| BP | GO:0051607 | 5/71 | 238/18670 | 0.002121013 | 0.006536541 | 0.002928295 | 5 |

|    |            |      |           |             |             |             |   |
|----|------------|------|-----------|-------------|-------------|-------------|---|
| BP | GO:0050769 | 7/71 | 474/18670 | 0.002131783 | 0.006563699 | 0.002940461 | 7 |
| BP | GO:0044344 | 4/71 | 143/18670 | 0.002154769 | 0.006628387 | 0.002969441 | 4 |
| BP | GO:0016239 | 3/71 | 68/18670  | 0.0022128   | 0.006782009 | 0.003038262 | 3 |
| BP | GO:0035924 | 3/71 | 68/18670  | 0.0022128   | 0.006782009 | 0.003038262 | 3 |
| BP | GO:0050891 | 3/71 | 68/18670  | 0.0022128   | 0.006782009 | 0.003038262 | 3 |
| BP | GO:0050918 | 3/71 | 68/18670  | 0.0022128   | 0.006782009 | 0.003038262 | 3 |
| BP | GO:0042593 | 5/71 | 241/18670 | 0.002239603 | 0.006857889 | 0.003072255 | 5 |
| BP | GO:0000077 | 4/71 | 145/18670 | 0.002266288 | 0.006920641 | 0.003100367 | 4 |
| BP | GO:0007605 | 4/71 | 145/18670 | 0.002266288 | 0.006920641 | 0.003100367 | 4 |
| BP | GO:0007612 | 4/71 | 145/18670 | 0.002266288 | 0.006920641 | 0.003100367 | 4 |
| BP | GO:0033500 | 5/71 | 242/18670 | 0.002280188 | 0.006956751 | 0.003116544 | 5 |
| BP | GO:0008088 | 3/71 | 69/18670  | 0.002307121 | 0.007026136 | 0.003147628 | 3 |
| BP | GO:0015909 | 3/71 | 69/18670  | 0.002307121 | 0.007026136 | 0.003147628 | 3 |
| BP | GO:0003085 | 2/71 | 19/18670  | 0.002338361 | 0.00705083  | 0.00315869  | 2 |
| BP | GO:0030949 | 2/71 | 19/18670  | 0.002338361 | 0.00705083  | 0.00315869  | 2 |
| BP | GO:0032930 | 2/71 | 19/18670  | 0.002338361 | 0.00705083  | 0.00315869  | 2 |
| BP | GO:0034138 | 2/71 | 19/18670  | 0.002338361 | 0.00705083  | 0.00315869  | 2 |
| BP | GO:0045076 | 2/71 | 19/18670  | 0.002338361 | 0.00705083  | 0.00315869  | 2 |
| BP | GO:0060149 | 2/71 | 19/18670  | 0.002338361 | 0.00705083  | 0.00315869  | 2 |
| BP | GO:0060252 | 2/71 | 19/18670  | 0.002338361 | 0.00705083  | 0.00315869  | 2 |
| BP | GO:0060716 | 2/71 | 19/18670  | 0.002338361 | 0.00705083  | 0.00315869  | 2 |
| BP | GO:0060967 | 2/71 | 19/18670  | 0.002338361 | 0.00705083  | 0.00315869  | 2 |
| BP | GO:0090201 | 2/71 | 19/18670  | 0.002338361 | 0.00705083  | 0.00315869  | 2 |
| BP | GO:1903798 | 2/71 | 19/18670  | 0.002338361 | 0.00705083  | 0.00315869  | 2 |
| BP | GO:0071236 | 4/71 | 147/18670 | 0.002381729 | 0.007175145 | 0.003214382 | 4 |
| BP | GO:0033077 | 3/71 | 70/18670  | 0.002403902 | 0.007222476 | 0.003235586 | 3 |
| BP | GO:0051966 | 3/71 | 70/18670  | 0.002403902 | 0.007222476 | 0.003235586 | 3 |
| BP | GO:2001259 | 3/71 | 70/18670  | 0.002403902 | 0.007222476 | 0.003235586 | 3 |
| BP | GO:0008643 | 4/71 | 148/18670 | 0.002440942 | 0.007327196 | 0.003282499 | 4 |
| BP | GO:0033692 | 3/71 | 71/18670  | 0.002503166 | 0.007500549 | 0.003360159 | 3 |
| BP | GO:1904427 | 3/71 | 71/18670  | 0.002503166 | 0.007500549 | 0.003360159 | 3 |
| BP | GO:0046434 | 5/71 | 248/18670 | 0.002535061 | 0.00758934  | 0.003399937 | 5 |
| BP | GO:0008203 | 4/71 | 150/18670 | 0.002562396 | 0.007650679 | 0.003427416 | 4 |
| BP | GO:0008360 | 4/71 | 150/18670 | 0.002562396 | 0.007650679 | 0.003427416 | 4 |
| BP | GO:0071774 | 4/71 | 150/18670 | 0.002562396 | 0.007650679 | 0.003427416 | 4 |
| BP | GO:0002827 | 2/71 | 20/18670  | 0.002591806 | 0.007670189 | 0.003436156 | 2 |
| BP | GO:0010042 | 2/71 | 20/18670  | 0.002591806 | 0.007670189 | 0.003436156 | 2 |
| BP | GO:0019373 | 2/71 | 20/18670  | 0.002591806 | 0.007670189 | 0.003436156 | 2 |
| BP | GO:0030220 | 2/71 | 20/18670  | 0.002591806 | 0.007670189 | 0.003436156 | 2 |
| BP | GO:0034393 | 2/71 | 20/18670  | 0.002591806 | 0.007670189 | 0.003436156 | 2 |
| BP | GO:0042535 | 2/71 | 20/18670  | 0.002591806 | 0.007670189 | 0.003436156 | 2 |
| BP | GO:0051767 | 2/71 | 20/18670  | 0.002591806 | 0.007670189 | 0.003436156 | 2 |
| BP | GO:0051769 | 2/71 | 20/18670  | 0.002591806 | 0.007670189 | 0.003436156 | 2 |
| BP | GO:0097709 | 2/71 | 20/18670  | 0.002591806 | 0.007670189 | 0.003436156 | 2 |
| BP | GO:1902993 | 2/71 | 20/18670  | 0.002591806 | 0.007670189 | 0.003436156 | 2 |
| BP | GO:0006635 | 3/71 | 72/18670  | 0.002604933 | 0.00770224  | 0.003450514 | 3 |
| BP | GO:0010951 | 5/71 | 250/18670 | 0.002624449 | 0.007746887 | 0.003470516 | 5 |
| BP | GO:0016999 | 4/71 | 151/18670 | 0.002624654 | 0.007746887 | 0.003470516 | 4 |
| BP | GO:0021537 | 5/71 | 251/18670 | 0.002669991 | 0.007873774 | 0.00352736  | 5 |
| BP | GO:0000187 | 4/71 | 152/18670 | 0.002687944 | 0.007912797 | 0.003544842 | 4 |
| BP | GO:0016202 | 4/71 | 152/18670 | 0.002687944 | 0.007912797 | 0.003544842 | 4 |
| BP | GO:0061844 | 3/71 | 73/18670  | 0.002709225 | 0.007968449 | 0.003569773 | 3 |
| BP | GO:0050729 | 4/71 | 153/18670 | 0.002752275 | 0.008087973 | 0.003623318 | 4 |
| BP | GO:0014015 | 3/71 | 74/18670  | 0.002816063 | 0.008243976 | 0.003693206 | 3 |
| BP | GO:0030104 | 3/71 | 74/18670  | 0.002816063 | 0.008243976 | 0.003693206 | 3 |
| BP | GO:0032507 | 3/71 | 74/18670  | 0.002816063 | 0.008243976 | 0.003693206 | 3 |
| BP | GO:0099601 | 3/71 | 74/18670  | 0.002816063 | 0.008243976 | 0.003693206 | 3 |
| BP | GO:0006090 | 4/71 | 154/18670 | 0.002817655 | 0.008243976 | 0.003693206 | 4 |
| BP | GO:0010893 | 2/71 | 21/18670  | 0.002857603 | 0.008288532 | 0.003713166 | 2 |
| BP | GO:0017000 | 2/71 | 21/18670  | 0.002857603 | 0.008288532 | 0.003713166 | 2 |
| BP | GO:0030728 | 2/71 | 21/18670  | 0.002857603 | 0.008288532 | 0.003713166 | 2 |
| BP | GO:0036344 | 2/71 | 21/18670  | 0.002857603 | 0.008288532 | 0.003713166 | 2 |
| BP | GO:0046716 | 2/71 | 21/18670  | 0.002857603 | 0.008288532 | 0.003713166 | 2 |



|    |            |      |           |             |             |             |   |
|----|------------|------|-----------|-------------|-------------|-------------|---|
| BP | GO:0046827 | 2/71 | 21/18670  | 0.002857603 | 0.008288532 | 0.003713166 | 2 |
| BP | GO:0051412 | 2/71 | 21/18670  | 0.002857603 | 0.008288532 | 0.003713166 | 2 |
| BP | GO:0070584 | 2/71 | 21/18670  | 0.002857603 | 0.008288532 | 0.003713166 | 2 |
| BP | GO:0070920 | 2/71 | 21/18670  | 0.002857603 | 0.008288532 | 0.003713166 | 2 |
| BP | GO:0071498 | 2/71 | 21/18670  | 0.002857603 | 0.008288532 | 0.003713166 | 2 |
| BP | GO:1901861 | 4/71 | 155/18670 | 0.002884093 | 0.008350917 | 0.003741115 | 4 |
| BP | GO:1902652 | 4/71 | 155/18670 | 0.002884093 | 0.008350917 | 0.003741115 | 4 |
| BP | GO:0090596 | 5/71 | 256/18670 | 0.002906365 | 0.008408146 | 0.003766752 | 5 |
| BP | GO:0007422 | 3/71 | 75/18670  | 0.002925467 | 0.008456113 | 0.003788241 | 3 |
| BP | GO:0048634 | 4/71 | 156/18670 | 0.002951596 | 0.008524292 | 0.003818784 | 4 |
| BP | GO:0043406 | 5/71 | 258/18670 | 0.003005033 | 0.008671148 | 0.003884574 | 5 |
| BP | GO:0001937 | 3/71 | 76/18670  | 0.003037458 | 0.008757176 | 0.003923114 | 3 |
| BP | GO:0003007 | 5/71 | 259/18670 | 0.003055266 | 0.008800951 | 0.003942724 | 5 |
| BP | GO:0009132 | 4/71 | 158/18670 | 0.003089836 | 0.008892893 | 0.003983914 | 4 |
| BP | GO:0032412 | 5/71 | 260/18670 | 0.003106104 | 0.008924394 | 0.003998025 | 5 |
| BP | GO:0072659 | 5/71 | 260/18670 | 0.003106104 | 0.008924394 | 0.003998025 | 5 |
| BP | GO:0032469 | 2/71 | 22/18670  | 0.003135657 | 0.008940357 | 0.004005176 | 2 |
| BP | GO:0032928 | 2/71 | 22/18670  | 0.003135657 | 0.008940357 | 0.004005176 | 2 |
| BP | GO:0042094 | 2/71 | 22/18670  | 0.003135657 | 0.008940357 | 0.004005176 | 2 |
| BP | GO:0045649 | 2/71 | 22/18670  | 0.003135657 | 0.008940357 | 0.004005176 | 2 |
| BP | GO:0045723 | 2/71 | 22/18670  | 0.003135657 | 0.008940357 | 0.004005176 | 2 |
| BP | GO:0051000 | 2/71 | 22/18670  | 0.003135657 | 0.008940357 | 0.004005176 | 2 |
| BP | GO:0051195 | 2/71 | 22/18670  | 0.003135657 | 0.008940357 | 0.004005176 | 2 |
| BP | GO:0060575 | 2/71 | 22/18670  | 0.003135657 | 0.008940357 | 0.004005176 | 2 |
| BP | GO:0090312 | 2/71 | 22/18670  | 0.003135657 | 0.008940357 | 0.004005176 | 2 |
| BP | GO:0002673 | 4/71 | 159/18670 | 0.003160589 | 0.009003785 | 0.004033591 | 4 |
| BP | GO:0010466 | 5/71 | 262/18670 | 0.003209613 | 0.00913568  | 0.004092679 | 5 |
| BP | GO:0006754 | 4/71 | 160/18670 | 0.003232441 | 0.009185064 | 0.004114802 | 4 |
| BP | GO:0007519 | 4/71 | 160/18670 | 0.003232441 | 0.009185064 | 0.004114802 | 4 |
| BP | GO:0030900 | 6/71 | 381/18670 | 0.003257928 | 0.009249647 | 0.004143735 | 6 |
| BP | GO:0000271 | 3/71 | 78/18670  | 0.003269277 | 0.009266174 | 0.004151139 | 3 |
| BP | GO:0031016 | 3/71 | 78/18670  | 0.003269277 | 0.009266174 | 0.004151139 | 3 |
| BP | GO:0035967 | 4/71 | 161/18670 | 0.003305401 | 0.009360651 | 0.004193463 | 4 |
| BP | GO:0140014 | 5/71 | 264/18670 | 0.003315592 | 0.009381585 | 0.004202842 | 5 |
| BP | GO:0001570 | 3/71 | 79/18670  | 0.003389144 | 0.009573545 | 0.004288838 | 3 |
| BP | GO:0055072 | 3/71 | 79/18670  | 0.003389144 | 0.009573545 | 0.004288838 | 3 |
| BP | GO:0036037 | 2/71 | 23/18670  | 0.003425875 | 0.00963671  | 0.004317135 | 2 |
| BP | GO:0045821 | 2/71 | 23/18670  | 0.003425875 | 0.00963671  | 0.004317135 | 2 |
| BP | GO:0050995 | 2/71 | 23/18670  | 0.003425875 | 0.00963671  | 0.004317135 | 2 |
| BP | GO:0051043 | 2/71 | 23/18670  | 0.003425875 | 0.00963671  | 0.004317135 | 2 |
| BP | GO:2000637 | 2/71 | 23/18670  | 0.003425875 | 0.00963671  | 0.004317135 | 2 |
| BP | GO:0006633 | 4/71 | 164/18670 | 0.003531012 | 0.009915815 | 0.00444217  | 4 |
| BP | GO:0007088 | 4/71 | 164/18670 | 0.003531012 | 0.009915815 | 0.00444217  | 4 |
| BP | GO:0007249 | 5/71 | 269/18670 | 0.003591566 | 0.010077423 | 0.004514569 | 5 |
| BP | GO:0050954 | 4/71 | 165/18670 | 0.003608486 | 0.010116433 | 0.004532045 | 4 |
| BP | GO:0030512 | 3/71 | 81/18670  | 0.003636887 | 0.010187537 | 0.004563899 | 3 |
| BP | GO:0009110 | 2/71 | 24/18670  | 0.003728161 | 0.010391126 | 0.004655104 | 2 |
| BP | GO:0042104 | 2/71 | 24/18670  | 0.003728161 | 0.010391126 | 0.004655104 | 2 |
| BP | GO:0050996 | 2/71 | 24/18670  | 0.003728161 | 0.010391126 | 0.004655104 | 2 |
| BP | GO:0060148 | 2/71 | 24/18670  | 0.003728161 | 0.010391126 | 0.004655104 | 2 |
| BP | GO:0071677 | 2/71 | 24/18670  | 0.003728161 | 0.010391126 | 0.004655104 | 2 |
| BP | GO:2000209 | 2/71 | 24/18670  | 0.003728161 | 0.010391126 | 0.004655104 | 2 |
| BP | GO:0051279 | 3/71 | 82/18670  | 0.0037648   | 0.010472954 | 0.004691762 | 3 |
| BP | GO:1905954 | 3/71 | 82/18670  | 0.0037648   | 0.010472954 | 0.004691762 | 3 |
| BP | GO:0035051 | 4/71 | 167/18670 | 0.00376689  | 0.010472954 | 0.004691762 | 4 |
| BP | GO:0051302 | 4/71 | 168/18670 | 0.003847836 | 0.010689141 | 0.004788612 | 4 |
| BP | GO:0042509 | 3/71 | 83/18670  | 0.003895431 | 0.010785616 | 0.004831831 | 3 |
| BP | GO:0071277 | 3/71 | 83/18670  | 0.003895431 | 0.010785616 | 0.004831831 | 3 |
| BP | GO:1903845 | 3/71 | 83/18670  | 0.003895431 | 0.010785616 | 0.004831831 | 3 |
| BP | GO:2000106 | 3/71 | 83/18670  | 0.003895431 | 0.010785616 | 0.004831831 | 3 |
| BP | GO:0030307 | 4/71 | 169/18670 | 0.003929955 | 0.010863263 | 0.004866616 | 4 |
| BP | GO:0060538 | 4/71 | 169/18670 | 0.003929955 | 0.010863263 | 0.004866616 | 4 |
| BP | GO:0016054 | 5/71 | 275/18670 | 0.003944125 | 0.010884486 | 0.004876124 | 5 |

|    |            |      |           |             |             |             |   |
|----|------------|------|-----------|-------------|-------------|-------------|---|
| BP | GO:0046395 | 5/71 | 275/18670 | 0.003944125 | 0.010884486 | 0.004876124 | 5 |
| BP | GO:0009404 | 2/71 | 25/18670  | 0.004042423 | 0.011028678 | 0.00494072  | 2 |
| BP | GO:0019054 | 2/71 | 25/18670  | 0.004042423 | 0.011028678 | 0.00494072  | 2 |
| BP | GO:0030813 | 2/71 | 25/18670  | 0.004042423 | 0.011028678 | 0.00494072  | 2 |
| BP | GO:0031639 | 2/71 | 25/18670  | 0.004042423 | 0.011028678 | 0.00494072  | 2 |
| BP | GO:0045662 | 2/71 | 25/18670  | 0.004042423 | 0.011028678 | 0.00494072  | 2 |
| BP | GO:0045672 | 2/71 | 25/18670  | 0.004042423 | 0.011028678 | 0.00494072  | 2 |
| BP | GO:0050927 | 2/71 | 25/18670  | 0.004042423 | 0.011028678 | 0.00494072  | 2 |
| BP | GO:0051197 | 2/71 | 25/18670  | 0.004042423 | 0.011028678 | 0.00494072  | 2 |
| BP | GO:0060330 | 2/71 | 25/18670  | 0.004042423 | 0.011028678 | 0.00494072  | 2 |
| BP | GO:0060334 | 2/71 | 25/18670  | 0.004042423 | 0.011028678 | 0.00494072  | 2 |
| BP | GO:0090025 | 2/71 | 25/18670  | 0.004042423 | 0.011028678 | 0.00494072  | 2 |
| BP | GO:1900101 | 2/71 | 25/18670  | 0.004042423 | 0.011028678 | 0.00494072  | 2 |
| BP | GO:2000353 | 2/71 | 25/18670  | 0.004042423 | 0.011028678 | 0.00494072  | 2 |
| BP | GO:2000679 | 2/71 | 25/18670  | 0.004042423 | 0.011028678 | 0.00494072  | 2 |
| BP | GO:0006937 | 4/71 | 171/18670 | 0.004097744 | 0.011161444 | 0.005000198 | 4 |
| BP | GO:0009206 | 4/71 | 171/18670 | 0.004097744 | 0.011161444 | 0.005000198 | 4 |
| BP | GO:0002028 | 3/71 | 85/18670  | 0.004164918 | 0.011316832 | 0.00506981  | 3 |
| BP | GO:0014031 | 3/71 | 85/18670  | 0.004164918 | 0.011316832 | 0.00506981  | 3 |
| BP | GO:0034308 | 3/71 | 85/18670  | 0.004164918 | 0.011316832 | 0.00506981  | 3 |
| BP | GO:0009145 | 4/71 | 172/18670 | 0.004183431 | 0.011357931 | 0.005088222 | 4 |
| BP | GO:0016525 | 4/71 | 173/18670 | 0.004270323 | 0.011584462 | 0.005189705 | 4 |
| BP | GO:0006732 | 6/71 | 403/18670 | 0.004284291 | 0.011612956 | 0.00520247  | 6 |
| BP | GO:0007260 | 3/71 | 86/18670  | 0.004303808 | 0.011647028 | 0.005217734 | 3 |
| BP | GO:0048013 | 3/71 | 86/18670  | 0.004303808 | 0.011647028 | 0.005217734 | 3 |
| BP | GO:2001252 | 4/71 | 174/18670 | 0.004358429 | 0.011727629 | 0.005253842 | 4 |
| BP | GO:0002360 | 2/71 | 26/18670  | 0.004368568 | 0.011727629 | 0.005253842 | 2 |
| BP | GO:0006309 | 2/71 | 26/18670  | 0.004368568 | 0.011727629 | 0.005253842 | 2 |
| BP | GO:0022011 | 2/71 | 26/18670  | 0.004368568 | 0.011727629 | 0.005253842 | 2 |
| BP | GO:0032292 | 2/71 | 26/18670  | 0.004368568 | 0.011727629 | 0.005253842 | 2 |
| BP | GO:0043567 | 2/71 | 26/18670  | 0.004368568 | 0.011727629 | 0.005253842 | 2 |
| BP | GO:0050926 | 2/71 | 26/18670  | 0.004368568 | 0.011727629 | 0.005253842 | 2 |
| BP | GO:0060544 | 2/71 | 26/18670  | 0.004368568 | 0.011727629 | 0.005253842 | 2 |
| BP | GO:0060706 | 2/71 | 26/18670  | 0.004368568 | 0.011727629 | 0.005253842 | 2 |
| BP | GO:1903579 | 2/71 | 26/18670  | 0.004368568 | 0.011727629 | 0.005253842 | 2 |
| BP | GO:0045844 | 3/71 | 87/18670  | 0.004445485 | 0.011902092 | 0.005332    | 3 |
| BP | GO:0048636 | 3/71 | 87/18670  | 0.004445485 | 0.011902092 | 0.005332    | 3 |
| BP | GO:0051781 | 3/71 | 87/18670  | 0.004445485 | 0.011902092 | 0.005332    | 3 |
| BP | GO:2000181 | 4/71 | 175/18670 | 0.004447755 | 0.011902092 | 0.005332    | 4 |
| BP | GO:0000280 | 6/71 | 407/18670 | 0.004494021 | 0.01201631  | 0.005383168 | 6 |
| BP | GO:0015980 | 5/71 | 285/18670 | 0.004585907 | 0.012233823 | 0.005480611 | 5 |
| BP | GO:0050829 | 3/71 | 88/18670  | 0.004589964 | 0.012233823 | 0.005480611 | 3 |
| BP | GO:0061097 | 3/71 | 88/18670  | 0.004589964 | 0.012233823 | 0.005480611 | 3 |
| BP | GO:1901863 | 3/71 | 88/18670  | 0.004589964 | 0.012233823 | 0.005480611 | 3 |
| BP | GO:0009201 | 4/71 | 177/18670 | 0.004630101 | 0.012331    | 0.005524145 | 4 |
| BP | GO:0002026 | 2/71 | 27/18670  | 0.004706503 | 0.012455332 | 0.005579845 | 2 |
| BP | GO:0002825 | 2/71 | 27/18670  | 0.004706503 | 0.012455332 | 0.005579845 | 2 |
| BP | GO:0072378 | 2/71 | 27/18670  | 0.004706503 | 0.012455332 | 0.005579845 | 2 |
| BP | GO:1901623 | 2/71 | 27/18670  | 0.004706503 | 0.012455332 | 0.005579845 | 2 |
| BP | GO:1905208 | 2/71 | 27/18670  | 0.004706503 | 0.012455332 | 0.005579845 | 2 |
| BP | GO:1905563 | 2/71 | 27/18670  | 0.004706503 | 0.012455332 | 0.005579845 | 2 |
| BP | GO:2000144 | 2/71 | 27/18670  | 0.004706503 | 0.012455332 | 0.005579845 | 2 |
| BP | GO:2000191 | 2/71 | 27/18670  | 0.004706503 | 0.012455332 | 0.005579845 | 2 |
| BP | GO:0097306 | 3/71 | 89/18670  | 0.004737262 | 0.012526846 | 0.005611882 | 3 |
| BP | GO:0032651 | 3/71 | 90/18670  | 0.004887396 | 0.012893342 | 0.005776068 | 3 |
| BP | GO:0045778 | 3/71 | 90/18670  | 0.004887396 | 0.012893342 | 0.005776068 | 3 |
| BP | GO:0046849 | 3/71 | 90/18670  | 0.004887396 | 0.012893342 | 0.005776068 | 3 |
| BP | GO:0002285 | 4/71 | 181/18670 | 0.005009787 | 0.013185099 | 0.005906772 | 4 |
| BP | GO:0022408 | 4/71 | 181/18670 | 0.005009787 | 0.013185099 | 0.005906772 | 4 |
| BP | GO:0051147 | 4/71 | 181/18670 | 0.005009787 | 0.013185099 | 0.005906772 | 4 |
| BP | GO:0051899 | 3/71 | 91/18670  | 0.005040379 | 0.013193173 | 0.005910389 | 3 |
| BP | GO:0001516 | 2/71 | 28/18670  | 0.005056137 | 0.013193173 | 0.005910389 | 2 |
| BP | GO:0003180 | 2/71 | 28/18670  | 0.005056137 | 0.013193173 | 0.005910389 | 2 |

|    |            |      |           |             |             |             |   |
|----|------------|------|-----------|-------------|-------------|-------------|---|
| BP | GO:0033137 | 2/71 | 28/18670  | 0.005056137 | 0.013193173 | 0.005910389 | 2 |
| BP | GO:0033598 | 2/71 | 28/18670  | 0.005056137 | 0.013193173 | 0.005910389 | 2 |
| BP | GO:0046457 | 2/71 | 28/18670  | 0.005056137 | 0.013193173 | 0.005910389 | 2 |
| BP | GO:1900543 | 2/71 | 28/18670  | 0.005056137 | 0.013193173 | 0.005910389 | 2 |
| BP | GO:1902003 | 2/71 | 28/18670  | 0.005056137 | 0.013193173 | 0.005910389 | 2 |
| BP | GO:1902932 | 2/71 | 28/18670  | 0.005056137 | 0.013193173 | 0.005910389 | 2 |
| BP | GO:1990776 | 2/71 | 28/18670  | 0.005056137 | 0.013193173 | 0.005910389 | 2 |
| BP | GO:2000108 | 2/71 | 28/18670  | 0.005056137 | 0.013193173 | 0.005910389 | 2 |
| BP | GO:0009166 | 4/71 | 182/18670 | 0.005107877 | 0.013317816 | 0.005966228 | 4 |
| BP | GO:0045833 | 3/71 | 92/18670  | 0.005196228 | 0.013534811 | 0.006063439 | 3 |
| BP | GO:0009127 | 4/71 | 183/18670 | 0.005207249 | 0.013534811 | 0.006063439 | 4 |
| BP | GO:0009168 | 4/71 | 183/18670 | 0.005207249 | 0.013534811 | 0.006063439 | 4 |
| BP | GO:0043123 | 4/71 | 183/18670 | 0.005207249 | 0.013534811 | 0.006063439 | 4 |
| BP | GO:0050768 | 5/71 | 295/18670 | 0.005299002 | 0.01376263  | 0.006165499 | 5 |
| BP | GO:0007589 | 3/71 | 93/18670  | 0.005354956 | 0.01387571  | 0.006216158 | 3 |
| BP | GO:0035249 | 3/71 | 93/18670  | 0.005354956 | 0.01387571  | 0.006216158 | 3 |
| BP | GO:0046634 | 3/71 | 93/18670  | 0.005354956 | 0.01387571  | 0.006216158 | 3 |
| BP | GO:0000083 | 2/71 | 29/18670  | 0.005417378 | 0.013951206 | 0.006249979 | 2 |
| BP | GO:0005979 | 2/71 | 29/18670  | 0.005417378 | 0.013951206 | 0.006249979 | 2 |
| BP | GO:0007263 | 2/71 | 29/18670  | 0.005417378 | 0.013951206 | 0.006249979 | 2 |
| BP | GO:0010962 | 2/71 | 29/18670  | 0.005417378 | 0.013951206 | 0.006249979 | 2 |
| BP | GO:0014044 | 2/71 | 29/18670  | 0.005417378 | 0.013951206 | 0.006249979 | 2 |
| BP | GO:0044068 | 2/71 | 29/18670  | 0.005417378 | 0.013951206 | 0.006249979 | 2 |
| BP | GO:0045980 | 2/71 | 29/18670  | 0.005417378 | 0.013951206 | 0.006249979 | 2 |
| BP | GO:1900027 | 2/71 | 29/18670  | 0.005417378 | 0.013951206 | 0.006249979 | 2 |
| BP | GO:0070167 | 3/71 | 94/18670  | 0.00551658  | 0.014195773 | 0.006359542 | 3 |
| BP | GO:1901343 | 4/71 | 187/18670 | 0.005617714 | 0.014444935 | 0.006471164 | 4 |
| BP | GO:0045069 | 3/71 | 95/18670  | 0.005681113 | 0.014580741 | 0.006532003 | 3 |
| BP | GO:0051651 | 3/71 | 95/18670  | 0.005681113 | 0.014580741 | 0.006532003 | 3 |
| BP | GO:0070372 | 5/71 | 300/18670 | 0.005683575 | 0.014580741 | 0.006532003 | 5 |
| BP | GO:0009142 | 4/71 | 188/18670 | 0.005723611 | 0.014649824 | 0.006562952 | 4 |
| BP | GO:0051783 | 4/71 | 188/18670 | 0.005723611 | 0.014649824 | 0.006562952 | 4 |
| BP | GO:1901292 | 4/71 | 188/18670 | 0.005723611 | 0.014649824 | 0.006562952 | 4 |
| BP | GO:0010743 | 2/71 | 30/18670  | 0.005790136 | 0.014752528 | 0.006608962 | 2 |
| BP | GO:0032743 | 2/71 | 30/18670  | 0.005790136 | 0.014752528 | 0.006608962 | 2 |
| BP | GO:0042759 | 2/71 | 30/18670  | 0.005790136 | 0.014752528 | 0.006608962 | 2 |
| BP | GO:0045940 | 2/71 | 30/18670  | 0.005790136 | 0.014752528 | 0.006608962 | 2 |
| BP | GO:0070168 | 2/71 | 30/18670  | 0.005790136 | 0.014752528 | 0.006608962 | 2 |
| BP | GO:0097421 | 2/71 | 30/18670  | 0.005790136 | 0.014752528 | 0.006608962 | 2 |
| BP | GO:0090277 | 3/71 | 96/18670  | 0.005848568 | 0.014890091 | 0.006670589 | 3 |
| BP | GO:0002675 | 2/71 | 31/18670  | 0.00617432  | 0.015636327 | 0.007004894 | 2 |
| BP | GO:0040018 | 2/71 | 31/18670  | 0.00617432  | 0.015636327 | 0.007004894 | 2 |
| BP | GO:0043457 | 2/71 | 31/18670  | 0.00617432  | 0.015636327 | 0.007004894 | 2 |
| BP | GO:0045737 | 2/71 | 31/18670  | 0.00617432  | 0.015636327 | 0.007004894 | 2 |
| BP | GO:0045879 | 2/71 | 31/18670  | 0.00617432  | 0.015636327 | 0.007004894 | 2 |
| BP | GO:1902230 | 2/71 | 31/18670  | 0.00617432  | 0.015636327 | 0.007004894 | 2 |
| BP | GO:1902253 | 2/71 | 31/18670  | 0.00617432  | 0.015636327 | 0.007004894 | 2 |
| BP | GO:0002042 | 3/71 | 98/18670  | 0.006192303 | 0.015670033 | 0.007019994 | 3 |
| BP | GO:1901570 | 3/71 | 99/18670  | 0.00636861  | 0.016104033 | 0.007214421 | 3 |
| BP | GO:0007215 | 3/71 | 100/18670 | 0.006547892 | 0.016463884 | 0.00737563  | 3 |
| BP | GO:0030301 | 3/71 | 100/18670 | 0.006547892 | 0.016463884 | 0.00737563  | 3 |
| BP | GO:0055024 | 3/71 | 100/18670 | 0.006547892 | 0.016463884 | 0.00737563  | 3 |
| BP | GO:0001975 | 2/71 | 32/18670  | 0.006569841 | 0.016463884 | 0.00737563  | 2 |
| BP | GO:0003176 | 2/71 | 32/18670  | 0.006569841 | 0.016463884 | 0.00737563  | 2 |
| BP | GO:0008210 | 2/71 | 32/18670  | 0.006569841 | 0.016463884 | 0.00737563  | 2 |
| BP | GO:0039694 | 2/71 | 32/18670  | 0.006569841 | 0.016463884 | 0.00737563  | 2 |
| BP | GO:0045589 | 2/71 | 32/18670  | 0.006569841 | 0.016463884 | 0.00737563  | 2 |
| BP | GO:0051385 | 2/71 | 32/18670  | 0.006569841 | 0.016463884 | 0.00737563  | 2 |
| BP | GO:0055094 | 2/71 | 32/18670  | 0.006569841 | 0.016463884 | 0.00737563  | 2 |
| BP | GO:0060674 | 2/71 | 32/18670  | 0.006569841 | 0.016463884 | 0.00737563  | 2 |
| BP | GO:1900745 | 2/71 | 32/18670  | 0.006569841 | 0.016463884 | 0.00737563  | 2 |
| BP | GO:0046632 | 3/71 | 101/18670 | 0.006730163 | 0.016845698 | 0.007546678 | 3 |
| BP | GO:0009156 | 4/71 | 197/18670 | 0.006737274 | 0.016845698 | 0.007546678 | 4 |

|    |            |      |           |             |             |             |   |
|----|------------|------|-----------|-------------|-------------|-------------|---|
| BP | GO:0009749 | 4/71 | 197/18670 | 0.006737274 | 0.016845698 | 0.007546678 | 4 |
| BP | GO:0051961 | 5/71 | 315/18670 | 0.006955466 | 0.017356145 | 0.007775352 | 5 |
| BP | GO:0045736 | 2/71 | 33/18670  | 0.006976609 | 0.017356145 | 0.007775352 | 2 |
| BP | GO:0051194 | 2/71 | 33/18670  | 0.006976609 | 0.017356145 | 0.007775352 | 2 |
| BP | GO:0070232 | 2/71 | 33/18670  | 0.006976609 | 0.017356145 | 0.007775352 | 2 |
| BP | GO:1902692 | 2/71 | 33/18670  | 0.006976609 | 0.017356145 | 0.007775352 | 2 |
| BP | GO:2000352 | 2/71 | 33/18670  | 0.006976609 | 0.017356145 | 0.007775352 | 2 |
| BP | GO:0016052 | 4/71 | 199/18670 | 0.006977657 | 0.017356145 | 0.007775352 | 4 |
| BP | GO:0006898 | 5/71 | 316/18670 | 0.007046785 | 0.017515101 | 0.007846563 | 5 |
| BP | GO:0032652 | 3/71 | 103/18670 | 0.007103722 | 0.017607884 | 0.007888129 | 3 |
| BP | GO:0034766 | 3/71 | 103/18670 | 0.007103722 | 0.017607884 | 0.007888129 | 3 |
| BP | GO:0044264 | 3/71 | 103/18670 | 0.007103722 | 0.017607884 | 0.007888129 | 3 |
| BP | GO:0007265 | 6/71 | 448/18670 | 0.00710512  | 0.017607884 | 0.007888129 | 6 |
| BP | GO:0048285 | 6/71 | 449/18670 | 0.00718011  | 0.017780584 | 0.007965496 | 6 |
| BP | GO:0019233 | 3/71 | 104/18670 | 0.007295033 | 0.018038529 | 0.008081053 | 3 |
| BP | GO:0032414 | 3/71 | 104/18670 | 0.007295033 | 0.018038529 | 0.008081053 | 3 |
| BP | GO:0007204 | 5/71 | 319/18670 | 0.007325787 | 0.018101225 | 0.00810914  | 5 |
| BP | GO:0000737 | 2/71 | 34/18670  | 0.007394535 | 0.018177329 | 0.008143234 | 2 |
| BP | GO:0034205 | 2/71 | 34/18670  | 0.007394535 | 0.018177329 | 0.008143234 | 2 |
| BP | GO:0042533 | 2/71 | 34/18670  | 0.007394535 | 0.018177329 | 0.008143234 | 2 |
| BP | GO:0042534 | 2/71 | 34/18670  | 0.007394535 | 0.018177329 | 0.008143234 | 2 |
| BP | GO:0045066 | 2/71 | 34/18670  | 0.007394535 | 0.018177329 | 0.008143234 | 2 |
| BP | GO:0071402 | 2/71 | 34/18670  | 0.007394535 | 0.018177329 | 0.008143234 | 2 |
| BP | GO:1904030 | 2/71 | 34/18670  | 0.007394535 | 0.018177329 | 0.008143234 | 2 |
| BP | GO:0008593 | 3/71 | 105/18670 | 0.007489381 | 0.018383525 | 0.008235607 | 3 |
| BP | GO:0045185 | 3/71 | 105/18670 | 0.007489381 | 0.018383525 | 0.008235607 | 3 |
| BP | GO:0060562 | 5/71 | 322/18670 | 0.007612437 | 0.01867191  | 0.0083648   | 5 |
| BP | GO:0002286 | 3/71 | 106/18670 | 0.007686777 | 0.01884047  | 0.008440313 | 3 |
| BP | GO:0060251 | 2/71 | 35/18670  | 0.007823532 | 0.0191337   | 0.008571676 | 2 |
| BP | GO:0070873 | 2/71 | 35/18670  | 0.007823532 | 0.0191337   | 0.008571676 | 2 |
| BP | GO:1902991 | 2/71 | 35/18670  | 0.007823532 | 0.0191337   | 0.008571676 | 2 |
| BP | GO:0006275 | 3/71 | 108/18670 | 0.008090757 | 0.019744039 | 0.008845101 | 3 |
| BP | GO:0009062 | 3/71 | 108/18670 | 0.008090757 | 0.019744039 | 0.008845101 | 3 |
| BP | GO:0046916 | 3/71 | 108/18670 | 0.008090757 | 0.019744039 | 0.008845101 | 3 |
| BP | GO:0009124 | 4/71 | 208/18670 | 0.008129712 | 0.019810266 | 0.00887477  | 4 |
| BP | GO:0050792 | 4/71 | 208/18670 | 0.008129712 | 0.019810266 | 0.00887477  | 4 |
| BP | GO:0003091 | 2/71 | 36/18670  | 0.008263511 | 0.01993349  | 0.008929973 | 2 |
| BP | GO:0010742 | 2/71 | 36/18670  | 0.008263511 | 0.01993349  | 0.008929973 | 2 |
| BP | GO:0030224 | 2/71 | 36/18670  | 0.008263511 | 0.01993349  | 0.008929973 | 2 |
| BP | GO:0030947 | 2/71 | 36/18670  | 0.008263511 | 0.01993349  | 0.008929973 | 2 |
| BP | GO:0034390 | 2/71 | 36/18670  | 0.008263511 | 0.01993349  | 0.008929973 | 2 |
| BP | GO:0034391 | 2/71 | 36/18670  | 0.008263511 | 0.01993349  | 0.008929973 | 2 |
| BP | GO:0045740 | 2/71 | 36/18670  | 0.008263511 | 0.01993349  | 0.008929973 | 2 |
| BP | GO:0051973 | 2/71 | 36/18670  | 0.008263511 | 0.01993349  | 0.008929973 | 2 |
| BP | GO:0071634 | 2/71 | 36/18670  | 0.008263511 | 0.01993349  | 0.008929973 | 2 |
| BP | GO:0090077 | 2/71 | 36/18670  | 0.008263511 | 0.01993349  | 0.008929973 | 2 |
| BP | GO:0090322 | 2/71 | 36/18670  | 0.008263511 | 0.01993349  | 0.008929973 | 2 |
| BP | GO:1903131 | 2/71 | 36/18670  | 0.008263511 | 0.01993349  | 0.008929973 | 2 |
| BP | GO:2000310 | 2/71 | 36/18670  | 0.008263511 | 0.01993349  | 0.008929973 | 2 |
| BP | GO:2001171 | 2/71 | 36/18670  | 0.008263511 | 0.01993349  | 0.008929973 | 2 |
| BP | GO:0001676 | 3/71 | 109/18670 | 0.008297363 | 0.02000076  | 0.008960109 | 3 |
| BP | GO:0008544 | 6/71 | 464/18670 | 0.008375221 | 0.020173935 | 0.00903769  | 6 |
| BP | GO:0001662 | 2/71 | 37/18670  | 0.008714385 | 0.020913932 | 0.0093692   | 2 |
| BP | GO:0038083 | 2/71 | 37/18670  | 0.008714385 | 0.020913932 | 0.0093692   | 2 |
| BP | GO:0090050 | 2/71 | 37/18670  | 0.008714385 | 0.020913932 | 0.0093692   | 2 |
| BP | GO:1905314 | 2/71 | 37/18670  | 0.008714385 | 0.020913932 | 0.0093692   | 2 |
| BP | GO:2000142 | 2/71 | 37/18670  | 0.008714385 | 0.020913932 | 0.0093692   | 2 |
| BP | GO:0022037 | 3/71 | 111/18670 | 0.008719856 | 0.020913932 | 0.0093692   | 3 |
| BP | GO:0015918 | 3/71 | 112/18670 | 0.008935763 | 0.021370623 | 0.009573792 | 3 |
| BP | GO:0042303 | 3/71 | 112/18670 | 0.008935763 | 0.021370623 | 0.009573792 | 3 |
| BP | GO:0042633 | 3/71 | 112/18670 | 0.008935763 | 0.021370623 | 0.009573792 | 3 |
| BP | GO:1903510 | 3/71 | 112/18670 | 0.008935763 | 0.021370623 | 0.009573792 | 3 |
| BP | GO:0010810 | 4/71 | 215/18670 | 0.009107549 | 0.021750435 | 0.009743944 | 4 |

|    |            |      |           |             |             |             |   |
|----|------------|------|-----------|-------------|-------------|-------------|---|
| BP | GO:0070374 | 4/71 | 215/18670 | 0.009107549 | 0.021750435 | 0.009743944 | 4 |
| BP | GO:0060964 | 3/71 | 113/18670 | 0.009154791 | 0.021774489 | 0.009754719 | 3 |
| BP | GO:0002209 | 2/71 | 38/18670  | 0.009176067 | 0.021774489 | 0.009754719 | 2 |
| BP | GO:0006778 | 2/71 | 38/18670  | 0.009176067 | 0.021774489 | 0.009754719 | 2 |
| BP | GO:0010939 | 2/71 | 38/18670  | 0.009176067 | 0.021774489 | 0.009754719 | 2 |
| BP | GO:0046825 | 2/71 | 38/18670  | 0.009176067 | 0.021774489 | 0.009754719 | 2 |
| BP | GO:0071604 | 2/71 | 38/18670  | 0.009176067 | 0.021774489 | 0.009754719 | 2 |
| BP | GO:1904037 | 2/71 | 38/18670  | 0.009176067 | 0.021774489 | 0.009754719 | 2 |
| BP | GO:1905898 | 2/71 | 38/18670  | 0.009176067 | 0.021774489 | 0.009754719 | 2 |
| BP | GO:2000279 | 2/71 | 38/18670  | 0.009176067 | 0.021774489 | 0.009754719 | 2 |
| BP | GO:0005976 | 3/71 | 114/18670 | 0.009376948 | 0.022204029 | 0.009947149 | 3 |
| BP | GO:0030218 | 3/71 | 114/18670 | 0.009376948 | 0.022204029 | 0.009947149 | 3 |
| BP | GO:0030282 | 3/71 | 114/18670 | 0.009376948 | 0.022204029 | 0.009947149 | 3 |
| BP | GO:0044242 | 4/71 | 217/18670 | 0.009400421 | 0.022243904 | 0.009965012 | 4 |
| BP | GO:0019722 | 4/71 | 218/18670 | 0.009549136 | 0.022579869 | 0.01011552  | 4 |
| BP | GO:0019048 | 2/71 | 39/18670  | 0.009648471 | 0.022734592 | 0.010184834 | 2 |
| BP | GO:0033574 | 2/71 | 39/18670  | 0.009648471 | 0.022734592 | 0.010184834 | 2 |
| BP | GO:0060969 | 2/71 | 39/18670  | 0.009648471 | 0.022734592 | 0.010184834 | 2 |
| BP | GO:0072595 | 2/71 | 39/18670  | 0.009648471 | 0.022734592 | 0.010184834 | 2 |
| BP | GO:1902229 | 2/71 | 39/18670  | 0.009648471 | 0.022734592 | 0.010184834 | 2 |
| BP | GO:0015711 | 6/71 | 482/18670 | 0.009991478 | 0.023526283 | 0.010539503 | 6 |
| BP | GO:0031398 | 3/71 | 117/18670 | 0.010062284 | 0.023626638 | 0.010584461 | 3 |
| BP | GO:0051153 | 3/71 | 117/18670 | 0.010062284 | 0.023626638 | 0.010584461 | 3 |
| BP | GO:0060147 | 3/71 | 117/18670 | 0.010062284 | 0.023626638 | 0.010584461 | 3 |
| BP | GO:0060966 | 3/71 | 117/18670 | 0.010062284 | 0.023626638 | 0.010584461 | 3 |
| BP | GO:0042026 | 2/71 | 40/18670  | 0.010131512 | 0.023739314 | 0.010634938 | 2 |
| BP | GO:0042596 | 2/71 | 40/18670  | 0.010131512 | 0.023739314 | 0.010634938 | 2 |
| BP | GO:0045124 | 2/71 | 40/18670  | 0.010131512 | 0.023739314 | 0.010634938 | 2 |
| BP | GO:0022604 | 6/71 | 484/18670 | 0.010183892 | 0.023845384 | 0.010682457 | 6 |
| BP | GO:0001952 | 3/71 | 119/18670 | 0.010534982 | 0.02465024  | 0.011043023 | 3 |
| BP | GO:0006308 | 2/71 | 41/18670  | 0.010625103 | 0.024774665 | 0.011098764 | 2 |
| BP | GO:0030890 | 2/71 | 41/18670  | 0.010625103 | 0.024774665 | 0.011098764 | 2 |
| BP | GO:0043267 | 2/71 | 41/18670  | 0.010625103 | 0.024774665 | 0.011098764 | 2 |
| BP | GO:0061028 | 2/71 | 41/18670  | 0.010625103 | 0.024774665 | 0.011098764 | 2 |
| BP | GO:0097178 | 2/71 | 41/18670  | 0.010625103 | 0.024774665 | 0.011098764 | 2 |
| BP | GO:0017015 | 3/71 | 120/18670 | 0.010776097 | 0.025109279 | 0.011248667 | 3 |
| BP | GO:0034404 | 4/71 | 226/18670 | 0.010794349 | 0.02512623  | 0.011256261 | 4 |
| BP | GO:0051260 | 5/71 | 351/18670 | 0.010798359 | 0.02512623  | 0.011256261 | 5 |
| BP | GO:0006457 | 4/71 | 227/18670 | 0.010957024 | 0.02547774  | 0.011413733 | 4 |
| BP | GO:0006509 | 2/71 | 42/18670  | 0.011129159 | 0.025824271 | 0.011568975 | 2 |
| BP | GO:0051154 | 2/71 | 42/18670  | 0.011129159 | 0.025824271 | 0.011568975 | 2 |
| BP | GO:1903146 | 2/71 | 42/18670  | 0.011129159 | 0.025824271 | 0.011568975 | 2 |
| BP | GO:0019730 | 3/71 | 122/18670 | 0.011267898 | 0.026110064 | 0.011697007 | 3 |
| BP | GO:1903844 | 3/71 | 122/18670 | 0.011267898 | 0.026110064 | 0.011697007 | 3 |
| BP | GO:0022412 | 5/71 | 357/18670 | 0.011556337 | 0.026741476 | 0.011979872 | 5 |
| BP | GO:0051480 | 5/71 | 357/18670 | 0.011556337 | 0.026741476 | 0.011979872 | 5 |
| BP | GO:0001953 | 2/71 | 43/18670  | 0.011643598 | 0.026795459 | 0.012004056 | 2 |
| BP | GO:0006692 | 2/71 | 43/18670  | 0.011643598 | 0.026795459 | 0.012004056 | 2 |
| BP | GO:0006693 | 2/71 | 43/18670  | 0.011643598 | 0.026795459 | 0.012004056 | 2 |
| BP | GO:0034198 | 2/71 | 43/18670  | 0.011643598 | 0.026795459 | 0.012004056 | 2 |
| BP | GO:0042088 | 2/71 | 43/18670  | 0.011643598 | 0.026795459 | 0.012004056 | 2 |
| BP | GO:0043616 | 2/71 | 43/18670  | 0.011643598 | 0.026795459 | 0.012004056 | 2 |
| BP | GO:0045746 | 2/71 | 43/18670  | 0.011643598 | 0.026795459 | 0.012004056 | 2 |
| BP | GO:0071364 | 2/71 | 43/18670  | 0.011643598 | 0.026795459 | 0.012004056 | 2 |
| BP | GO:0051209 | 3/71 | 124/18670 | 0.011772509 | 0.027073541 | 0.012128634 | 3 |
| BP | GO:0003197 | 2/71 | 44/18670  | 0.012168334 | 0.02788819  | 0.012493587 | 2 |
| BP | GO:0042987 | 2/71 | 44/18670  | 0.012168334 | 0.02788819  | 0.012493587 | 2 |
| BP | GO:0061756 | 2/71 | 44/18670  | 0.012168334 | 0.02788819  | 0.012493587 | 2 |
| BP | GO:0090311 | 2/71 | 44/18670  | 0.012168334 | 0.02788819  | 0.012493587 | 2 |
| BP | GO:1903573 | 2/71 | 44/18670  | 0.012168334 | 0.02788819  | 0.012493587 | 2 |
| BP | GO:0018107 | 3/71 | 126/18670 | 0.012289985 | 0.028109358 | 0.012592668 | 3 |
| BP | GO:0051283 | 3/71 | 126/18670 | 0.012289985 | 0.028109358 | 0.012592668 | 3 |
| BP | GO:0090101 | 3/71 | 126/18670 | 0.012289985 | 0.028109358 | 0.012592668 | 3 |

|    |            |      |           |             |             |             |   |
|----|------------|------|-----------|-------------|-------------|-------------|---|
| BP | GO:0046777 | 4/71 | 235/18670 | 0.01231576  | 0.028149109 | 0.012610476 | 4 |
| BP | GO:0035270 | 3/71 | 127/18670 | 0.012553563 | 0.02867309  | 0.012845213 | 3 |
| BP | GO:0001974 | 2/71 | 45/18670  | 0.012703284 | 0.028955887 | 0.012971903 | 2 |
| BP | GO:0031018 | 2/71 | 45/18670  | 0.012703284 | 0.028955887 | 0.012971903 | 2 |
| BP | GO:0035987 | 2/71 | 45/18670  | 0.012703284 | 0.028955887 | 0.012971903 | 2 |
| BP | GO:0002576 | 3/71 | 128/18670 | 0.012820376 | 0.029183111 | 0.013073696 | 3 |
| BP | GO:0051282 | 3/71 | 128/18670 | 0.012820376 | 0.029183111 | 0.013073696 | 3 |
| BP | GO:0003206 | 3/71 | 129/18670 | 0.013090431 | 0.029757434 | 0.013330987 | 3 |
| BP | GO:0050853 | 3/71 | 129/18670 | 0.013090431 | 0.029757434 | 0.013330987 | 3 |
| BP | GO:0005978 | 2/71 | 46/18670  | 0.013248365 | 0.029913647 | 0.013400968 | 2 |
| BP | GO:0007157 | 2/71 | 46/18670  | 0.013248365 | 0.029913647 | 0.013400968 | 2 |
| BP | GO:0009250 | 2/71 | 46/18670  | 0.013248365 | 0.029913647 | 0.013400968 | 2 |
| BP | GO:0014075 | 2/71 | 46/18670  | 0.013248365 | 0.029913647 | 0.013400968 | 2 |
| BP | GO:0035196 | 2/71 | 46/18670  | 0.013248365 | 0.029913647 | 0.013400968 | 2 |
| BP | GO:0043330 | 2/71 | 46/18670  | 0.013248365 | 0.029913647 | 0.013400968 | 2 |
| BP | GO:0044003 | 2/71 | 46/18670  | 0.013248365 | 0.029913647 | 0.013400968 | 2 |
| BP | GO:0071354 | 2/71 | 46/18670  | 0.013248365 | 0.029913647 | 0.013400968 | 2 |
| BP | GO:0071675 | 2/71 | 46/18670  | 0.013248365 | 0.029913647 | 0.013400968 | 2 |
| BP | GO:1990928 | 2/71 | 46/18670  | 0.013248365 | 0.029913647 | 0.013400968 | 2 |
| BP | GO:0038093 | 4/71 | 241/18670 | 0.013402824 | 0.030242038 | 0.013548084 | 4 |
| BP | GO:0051208 | 3/71 | 131/18670 | 0.013640286 | 0.030736478 | 0.013769587 | 3 |
| BP | GO:0055076 | 3/71 | 131/18670 | 0.013640286 | 0.030736478 | 0.013769587 | 3 |
| BP | GO:0014911 | 2/71 | 47/18670  | 0.013803494 | 0.030917245 | 0.013850569 | 2 |
| BP | GO:0031952 | 2/71 | 47/18670  | 0.013803494 | 0.030917245 | 0.013850569 | 2 |
| BP | GO:0035722 | 2/71 | 47/18670  | 0.013803494 | 0.030917245 | 0.013850569 | 2 |
| BP | GO:0042551 | 2/71 | 47/18670  | 0.013803494 | 0.030917245 | 0.013850569 | 2 |
| BP | GO:0048066 | 2/71 | 47/18670  | 0.013803494 | 0.030917245 | 0.013850569 | 2 |
| BP | GO:0048806 | 2/71 | 47/18670  | 0.013803494 | 0.030917245 | 0.013850569 | 2 |
| BP | GO:0050435 | 2/71 | 47/18670  | 0.013803494 | 0.030917245 | 0.013850569 | 2 |
| BP | GO:1900744 | 2/71 | 47/18670  | 0.013803494 | 0.030917245 | 0.013850569 | 2 |
| BP | GO:1903580 | 2/71 | 47/18670  | 0.013803494 | 0.030917245 | 0.013850569 | 2 |
| BP | GO:0003158 | 3/71 | 132/18670 | 0.013920097 | 0.031136815 | 0.013948934 | 3 |
| BP | GO:0072329 | 3/71 | 132/18670 | 0.013920097 | 0.031136815 | 0.013948934 | 3 |
| BP | GO:0001774 | 2/71 | 48/18670  | 0.01436859  | 0.031927026 | 0.014302939 | 2 |
| BP | GO:0002269 | 2/71 | 48/18670  | 0.01436859  | 0.031927026 | 0.014302939 | 2 |
| BP | GO:0007595 | 2/71 | 48/18670  | 0.01436859  | 0.031927026 | 0.014302939 | 2 |
| BP | GO:0008089 | 2/71 | 48/18670  | 0.01436859  | 0.031927026 | 0.014302939 | 2 |
| BP | GO:0035272 | 2/71 | 48/18670  | 0.01436859  | 0.031927026 | 0.014302939 | 2 |
| BP | GO:0045912 | 2/71 | 48/18670  | 0.01436859  | 0.031927026 | 0.014302939 | 2 |
| BP | GO:0046850 | 2/71 | 48/18670  | 0.01436859  | 0.031927026 | 0.014302939 | 2 |
| BP | GO:0060324 | 2/71 | 48/18670  | 0.01436859  | 0.031927026 | 0.014302939 | 2 |
| BP | GO:0101023 | 2/71 | 48/18670  | 0.01436859  | 0.031927026 | 0.014302939 | 2 |
| BP | GO:1905562 | 2/71 | 48/18670  | 0.01436859  | 0.031927026 | 0.014302939 | 2 |
| BP | GO:0007272 | 3/71 | 134/18670 | 0.014489512 | 0.032131835 | 0.014394691 | 3 |
| BP | GO:0008366 | 3/71 | 134/18670 | 0.014489512 | 0.032131835 | 0.014394691 | 3 |
| BP | GO:0018210 | 3/71 | 134/18670 | 0.014489512 | 0.032131835 | 0.014394691 | 3 |
| BP | GO:0060359 | 3/71 | 135/18670 | 0.014779126 | 0.032730785 | 0.014663014 | 3 |
| BP | GO:1903322 | 3/71 | 135/18670 | 0.014779126 | 0.032730785 | 0.014663014 | 3 |
| BP | GO:0003044 | 2/71 | 49/18670  | 0.014943571 | 0.03300777  | 0.014787099 | 2 |
| BP | GO:0032757 | 2/71 | 49/18670  | 0.014943571 | 0.03300777  | 0.014787099 | 2 |
| BP | GO:0061912 | 2/71 | 49/18670  | 0.014943571 | 0.03300777  | 0.014787099 | 2 |
| BP | GO:0071349 | 2/71 | 49/18670  | 0.014943571 | 0.03300777  | 0.014787099 | 2 |
| BP | GO:0001706 | 2/71 | 50/18670  | 0.015528356 | 0.034164421 | 0.015305266 | 2 |
| BP | GO:0014009 | 2/71 | 50/18670  | 0.015528356 | 0.034164421 | 0.015305266 | 2 |
| BP | GO:0045540 | 2/71 | 50/18670  | 0.015528356 | 0.034164421 | 0.015305266 | 2 |
| BP | GO:0070671 | 2/71 | 50/18670  | 0.015528356 | 0.034164421 | 0.015305266 | 2 |
| BP | GO:0070741 | 2/71 | 50/18670  | 0.015528356 | 0.034164421 | 0.015305266 | 2 |
| BP | GO:0106118 | 2/71 | 50/18670  | 0.015528356 | 0.034164421 | 0.015305266 | 2 |
| BP | GO:2000027 | 4/71 | 253/18670 | 0.015756533 | 0.034643708 | 0.015519981 | 4 |
| BP | GO:0002700 | 3/71 | 139/18670 | 0.015970387 | 0.035044966 | 0.01569974  | 3 |
| BP | GO:0045580 | 3/71 | 139/18670 | 0.015970387 | 0.035044966 | 0.01569974  | 3 |
| BP | GO:0050715 | 3/71 | 139/18670 | 0.015970387 | 0.035044966 | 0.01569974  | 3 |
| BP | GO:0031050 | 2/71 | 51/18670  | 0.016122864 | 0.035287182 | 0.01580825  | 2 |

|    |            |      |           |             |             |             |   |
|----|------------|------|-----------|-------------|-------------|-------------|---|
| BP | GO:0070918 | 2/71 | 51/18670  | 0.016122864 | 0.035287182 | 0.01580825  | 2 |
| BP | GO:0097366 | 2/71 | 51/18670  | 0.016122864 | 0.035287182 | 0.01580825  | 2 |
| BP | GO:2001258 | 2/71 | 51/18670  | 0.016122864 | 0.035287182 | 0.01580825  | 2 |
| BP | GO:0001837 | 3/71 | 140/18670 | 0.016276424 | 0.035530501 | 0.015917254 | 3 |
| BP | GO:0046330 | 3/71 | 140/18670 | 0.016276424 | 0.035530501 | 0.015917254 | 3 |
| BP | GO:0097553 | 3/71 | 140/18670 | 0.016276424 | 0.035530501 | 0.015917254 | 3 |
| BP | GO:1903364 | 3/71 | 140/18670 | 0.016276424 | 0.035530501 | 0.015917254 | 3 |
| BP | GO:0008286 | 3/71 | 141/18670 | 0.016585757 | 0.036179705 | 0.01620809  | 3 |
| BP | GO:0048863 | 4/71 | 257/18670 | 0.016595403 | 0.036179705 | 0.01620809  | 4 |
| BP | GO:0003179 | 2/71 | 52/18670  | 0.016727015 | 0.03639564  | 0.016304826 | 2 |
| BP | GO:0031529 | 2/71 | 52/18670  | 0.016727015 | 0.03639564  | 0.016304826 | 2 |
| BP | GO:2000677 | 2/71 | 52/18670  | 0.016727015 | 0.03639564  | 0.016304826 | 2 |
| BP | GO:0031056 | 3/71 | 143/18670 | 0.017214324 | 0.03738318  | 0.016747233 | 3 |
| BP | GO:0106106 | 3/71 | 143/18670 | 0.017214324 | 0.03738318  | 0.016747233 | 3 |
| BP | GO:0120161 | 3/71 | 143/18670 | 0.017214324 | 0.03738318  | 0.016747233 | 3 |
| BP | GO:0000186 | 2/71 | 53/18670  | 0.017340729 | 0.037536129 | 0.016815752 | 2 |
| BP | GO:0038066 | 2/71 | 53/18670  | 0.017340729 | 0.037536129 | 0.016815752 | 2 |
| BP | GO:0043331 | 2/71 | 53/18670  | 0.017340729 | 0.037536129 | 0.016815752 | 2 |
| BP | GO:0045744 | 2/71 | 53/18670  | 0.017340729 | 0.037536129 | 0.016815752 | 2 |
| BP | GO:0060563 | 2/71 | 53/18670  | 0.017340729 | 0.037536129 | 0.016815752 | 2 |
| BP | GO:0060041 | 3/71 | 144/18670 | 0.017533564 | 0.037929059 | 0.01699178  | 3 |
| BP | GO:0007281 | 4/71 | 262/18670 | 0.017682851 | 0.038202705 | 0.01711437  | 4 |
| BP | GO:0015850 | 4/71 | 262/18670 | 0.017682851 | 0.038202705 | 0.01711437  | 4 |
| BP | GO:0006636 | 2/71 | 54/18670  | 0.017963927 | 0.038760004 | 0.017364034 | 2 |
| BP | GO:0032663 | 2/71 | 54/18670  | 0.017963927 | 0.038760004 | 0.017364034 | 2 |
| BP | GO:0002224 | 3/71 | 146/18670 | 0.018181971 | 0.039205241 | 0.017563495 | 3 |
| BP | GO:0042304 | 2/71 | 55/18670  | 0.018596529 | 0.040021928 | 0.017929361 | 2 |
| BP | GO:0046456 | 2/71 | 55/18670  | 0.018596529 | 0.040021928 | 0.017929361 | 2 |
| BP | GO:0061098 | 2/71 | 55/18670  | 0.018596529 | 0.040021928 | 0.017929361 | 2 |
| BP | GO:0008277 | 3/71 | 149/18670 | 0.019179434 | 0.04119708  | 0.018455816 | 3 |
| BP | GO:0048592 | 3/71 | 149/18670 | 0.019179434 | 0.04119708  | 0.018455816 | 3 |
| BP | GO:1903900 | 3/71 | 149/18670 | 0.019179434 | 0.04119708  | 0.018455816 | 3 |
| BP | GO:0006749 | 2/71 | 56/18670  | 0.019238459 | 0.041270987 | 0.018488925 | 2 |
| BP | GO:0090183 | 2/71 | 56/18670  | 0.019238459 | 0.041270987 | 0.018488925 | 2 |
| BP | GO:0016331 | 3/71 | 150/18670 | 0.019518557 | 0.041818353 | 0.018734139 | 3 |
| BP | GO:0050777 | 3/71 | 150/18670 | 0.019518557 | 0.041818353 | 0.018734139 | 3 |
| BP | GO:0055088 | 3/71 | 151/18670 | 0.019861001 | 0.042497726 | 0.01903849  | 3 |
| BP | GO:1903169 | 3/71 | 151/18670 | 0.019861001 | 0.042497726 | 0.01903849  | 3 |
| BP | GO:0048008 | 2/71 | 57/18670  | 0.019889637 | 0.042531858 | 0.019053781 | 2 |
| BP | GO:0030902 | 3/71 | 152/18670 | 0.020206767 | 0.043182467 | 0.019345246 | 3 |
| BP | GO:0061448 | 4/71 | 273/18670 | 0.020229524 | 0.043203564 | 0.019354697 | 4 |
| BP | GO:0034250 | 3/71 | 153/18670 | 0.020555857 | 0.043872558 | 0.019654399 | 3 |
| BP | GO:0055067 | 3/71 | 154/18670 | 0.020908272 | 0.044567982 | 0.019965941 | 3 |
| BP | GO:1990845 | 3/71 | 154/18670 | 0.020908272 | 0.044567982 | 0.019965941 | 3 |
| BP | GO:0001885 | 2/71 | 59/18670  | 0.021219429 | 0.045116516 | 0.020211678 | 2 |
| BP | GO:0032890 | 2/71 | 59/18670  | 0.021219429 | 0.045116516 | 0.020211678 | 2 |
| BP | GO:0033619 | 2/71 | 59/18670  | 0.021219429 | 0.045116516 | 0.020211678 | 2 |
| BP | GO:0061077 | 2/71 | 59/18670  | 0.021219429 | 0.045116516 | 0.020211678 | 2 |
| BP | GO:0060968 | 3/71 | 155/18670 | 0.021264012 | 0.045182657 | 0.020241308 | 3 |
| BP | GO:0043588 | 5/71 | 419/18670 | 0.02160219  | 0.045872162 | 0.020550198 | 5 |
| BP | GO:0033013 | 2/71 | 60/18670  | 0.02189789  | 0.046470648 | 0.020818314 | 2 |
| BP | GO:0003170 | 2/71 | 61/18670  | 0.022585292 | 0.047778222 | 0.021404092 | 2 |
| BP | GO:0007405 | 2/71 | 61/18670  | 0.022585292 | 0.047778222 | 0.021404092 | 2 |
| BP | GO:0030521 | 2/71 | 61/18670  | 0.022585292 | 0.047778222 | 0.021404092 | 2 |
| BP | GO:0034113 | 2/71 | 61/18670  | 0.022585292 | 0.047778222 | 0.021404092 | 2 |
| BP | GO:0048645 | 2/71 | 61/18670  | 0.022585292 | 0.047778222 | 0.021404092 | 2 |
| BP | GO:0016579 | 4/71 | 283/18670 | 0.022732015 | 0.048058288 | 0.021529558 | 4 |
| BP | GO:0002819 | 3/71 | 160/18670 | 0.023092624 | 0.048759174 | 0.021843547 | 3 |
| BP | GO:0030203 | 3/71 | 160/18670 | 0.023092624 | 0.048759174 | 0.021843547 | 3 |
| BP | GO:0006521 | 2/71 | 62/18670  | 0.023281559 | 0.048881068 | 0.021898154 | 2 |
| BP | GO:0010830 | 2/71 | 62/18670  | 0.023281559 | 0.048881068 | 0.021898154 | 2 |
| BP | GO:0031640 | 2/71 | 62/18670  | 0.023281559 | 0.048881068 | 0.021898154 | 2 |
| BP | GO:0032623 | 2/71 | 62/18670  | 0.023281559 | 0.048881068 | 0.021898154 | 2 |

|    |            |      |           |             |             |             |   |
|----|------------|------|-----------|-------------|-------------|-------------|---|
| BP | GO:0032835 | 2/71 | 62/18670  | 0.023281559 | 0.048881068 | 0.021898154 | 2 |
| BP | GO:0044364 | 2/71 | 62/18670  | 0.023281559 | 0.048881068 | 0.021898154 | 2 |
| BP | GO:0046635 | 2/71 | 62/18670  | 0.023281559 | 0.048881068 | 0.021898154 | 2 |
| BP | GO:0048857 | 2/71 | 62/18670  | 0.023281559 | 0.048881068 | 0.021898154 | 2 |
| BP | GO:0055025 | 2/71 | 62/18670  | 0.023281559 | 0.048881068 | 0.021898154 | 2 |
| BP | GO:0010970 | 3/71 | 161/18670 | 0.023468331 | 0.049211578 | 0.022046218 | 3 |
| BP | GO:0099111 | 3/71 | 161/18670 | 0.023468331 | 0.049211578 | 0.022046218 | 3 |
| BP | GO:0007588 | 2/71 | 63/18670  | 0.023986616 | 0.050110357 | 0.022448861 | 2 |
| BP | GO:0032371 | 2/71 | 63/18670  | 0.023986616 | 0.050110357 | 0.022448861 | 2 |
| BP | GO:0032374 | 2/71 | 63/18670  | 0.023986616 | 0.050110357 | 0.022448861 | 2 |
| BP | GO:0042982 | 2/71 | 63/18670  | 0.023986616 | 0.050110357 | 0.022448861 | 2 |
| BP | GO:0046622 | 2/71 | 63/18670  | 0.023986616 | 0.050110357 | 0.022448861 | 2 |
| BP | GO:0090181 | 2/71 | 63/18670  | 0.023986616 | 0.050110357 | 0.022448861 | 2 |
| BP | GO:0048562 | 4/71 | 288/18670 | 0.024051197 | 0.050213987 | 0.022495286 | 4 |
| BP | GO:0036498 | 2/71 | 64/18670  | 0.024700388 | 0.05137742  | 0.023016491 | 2 |
| BP | GO:0043550 | 2/71 | 64/18670  | 0.024700388 | 0.05137742  | 0.023016491 | 2 |
| BP | GO:0045669 | 2/71 | 64/18670  | 0.024700388 | 0.05137742  | 0.023016491 | 2 |
| BP | GO:0045670 | 2/71 | 64/18670  | 0.024700388 | 0.05137742  | 0.023016491 | 2 |
| BP | GO:0048247 | 2/71 | 64/18670  | 0.024700388 | 0.05137742  | 0.023016491 | 2 |
| BP | GO:1903672 | 2/71 | 64/18670  | 0.024700388 | 0.05137742  | 0.023016491 | 2 |
| BP | GO:0002244 | 3/71 | 166/18670 | 0.02539678  | 0.052716545 | 0.023616403 | 3 |
| BP | GO:0090288 | 3/71 | 166/18670 | 0.02539678  | 0.052716545 | 0.023616403 | 3 |
| BP | GO:0014823 | 2/71 | 65/18670  | 0.025422801 | 0.052716545 | 0.023616403 | 2 |
| BP | GO:0032729 | 2/71 | 65/18670  | 0.025422801 | 0.052716545 | 0.023616403 | 2 |
| BP | GO:0051148 | 2/71 | 65/18670  | 0.025422801 | 0.052716545 | 0.023616403 | 2 |
| BP | GO:0010256 | 5/71 | 438/18670 | 0.025553889 | 0.052955618 | 0.023723505 | 5 |
| BP | GO:0046626 | 2/71 | 66/18670  | 0.026153781 | 0.054131869 | 0.024250452 | 2 |
| BP | GO:1905207 | 2/71 | 66/18670  | 0.026153781 | 0.054131869 | 0.024250452 | 2 |
| BP | GO:0001906 | 3/71 | 168/18670 | 0.026191441 | 0.054176374 | 0.02427039  | 3 |
| BP | GO:0038095 | 3/71 | 169/18670 | 0.026593757 | 0.054940769 | 0.02461283  | 3 |
| BP | GO:0045619 | 3/71 | 169/18670 | 0.026593757 | 0.054940769 | 0.02461283  | 3 |
| BP | GO:2000573 | 2/71 | 67/18670  | 0.026893254 | 0.055525295 | 0.024874691 | 2 |
| BP | GO:0006022 | 3/71 | 170/18670 | 0.026999395 | 0.055675875 | 0.024942149 | 3 |
| BP | GO:0043433 | 3/71 | 170/18670 | 0.026999395 | 0.055675875 | 0.024942149 | 3 |
| BP | GO:0070646 | 4/71 | 299/18670 | 0.027114906 | 0.055879704 | 0.025033462 | 4 |
| BP | GO:0003205 | 3/71 | 171/18670 | 0.027408353 | 0.056449759 | 0.02528884  | 3 |
| BP | GO:0010812 | 2/71 | 68/18670  | 0.027641146 | 0.056789684 | 0.025441122 | 2 |
| BP | GO:0035914 | 2/71 | 68/18670  | 0.027641146 | 0.056789684 | 0.025441122 | 2 |
| BP | GO:0046323 | 2/71 | 68/18670  | 0.027641146 | 0.056789684 | 0.025441122 | 2 |
| BP | GO:0071242 | 2/71 | 68/18670  | 0.027641146 | 0.056789684 | 0.025441122 | 2 |
| BP | GO:0030324 | 3/71 | 172/18670 | 0.02782063  | 0.057088478 | 0.025574978 | 3 |
| BP | GO:0032874 | 3/71 | 172/18670 | 0.02782063  | 0.057088478 | 0.025574978 | 3 |
| BP | GO:0070304 | 3/71 | 173/18670 | 0.028236224 | 0.057905846 | 0.02594115  | 3 |
| BP | GO:0045088 | 5/71 | 452/18670 | 0.028745948 | 0.058915138 | 0.026393301 | 5 |
| BP | GO:0046034 | 4/71 | 305/18670 | 0.028880497 | 0.059154738 | 0.026500639 | 4 |
| BP | GO:0002695 | 3/71 | 175/18670 | 0.029077354 | 0.059521592 | 0.026664986 | 3 |
| BP | GO:0007004 | 2/71 | 70/18670  | 0.0291619   | 0.059549239 | 0.026677371 | 2 |
| BP | GO:0034121 | 2/71 | 70/18670  | 0.0291619   | 0.059549239 | 0.026677371 | 2 |
| BP | GO:0060395 | 2/71 | 70/18670  | 0.0291619   | 0.059549239 | 0.026677371 | 2 |
| BP | GO:0072091 | 2/71 | 70/18670  | 0.0291619   | 0.059549239 | 0.026677371 | 2 |
| BP | GO:0030323 | 3/71 | 176/18670 | 0.029502887 | 0.060208873 | 0.02697288  | 3 |
| BP | GO:0043488 | 3/71 | 177/18670 | 0.029931728 | 0.060978597 | 0.027317707 | 3 |
| BP | GO:0042440 | 2/71 | 71/18670  | 0.029934617 | 0.060978597 | 0.027317707 | 2 |
| BP | GO:0042531 | 2/71 | 71/18670  | 0.029934617 | 0.060978597 | 0.027317707 | 2 |
| BP | GO:0002697 | 5/71 | 458/18670 | 0.03018835  | 0.061420836 | 0.027515825 | 5 |
| BP | GO:0006874 | 5/71 | 458/18670 | 0.03018835  | 0.061420836 | 0.027515825 | 5 |
| BP | GO:0022406 | 3/71 | 178/18670 | 0.030363875 | 0.061703074 | 0.027642264 | 3 |
| BP | GO:0050821 | 3/71 | 178/18670 | 0.030363875 | 0.061703074 | 0.027642264 | 3 |
| BP | GO:0002532 | 2/71 | 72/18670  | 0.030715465 | 0.062304268 | 0.027911592 | 2 |
| BP | GO:0032024 | 2/71 | 72/18670  | 0.030715465 | 0.062304268 | 0.027911592 | 2 |
| BP | GO:0050805 | 2/71 | 72/18670  | 0.030715465 | 0.062304268 | 0.027911592 | 2 |
| BP | GO:0030705 | 3/71 | 180/18670 | 0.031238078 | 0.063249562 | 0.028335073 | 3 |
| BP | GO:0070613 | 3/71 | 180/18670 | 0.031238078 | 0.063249562 | 0.028335073 | 3 |



|    |            |      |           |             |             |             |   |
|----|------------|------|-----------|-------------|-------------|-------------|---|
| BP | GO:1901796 | 3/71 | 180/18670 | 0.031238078 | 0.063249562 | 0.028335073 | 3 |
| BP | GO:0033555 | 2/71 | 73/18670  | 0.031504373 | 0.0637118   | 0.02854215  | 2 |
| BP | GO:0045685 | 2/71 | 73/18670  | 0.031504373 | 0.0637118   | 0.02854215  | 2 |
| BP | GO:0009566 | 3/71 | 182/18670 | 0.032125472 | 0.064889584 | 0.029069784 | 3 |
| BP | GO:1903317 | 3/71 | 182/18670 | 0.032125472 | 0.064889584 | 0.029069784 | 3 |
| BP | GO:0001895 | 2/71 | 74/18670  | 0.032301271 | 0.065087837 | 0.029158599 | 2 |
| BP | GO:0005977 | 2/71 | 74/18670  | 0.032301271 | 0.065087837 | 0.029158599 | 2 |
| BP | GO:0032677 | 2/71 | 74/18670  | 0.032301271 | 0.065087837 | 0.029158599 | 2 |
| BP | GO:1900076 | 2/71 | 74/18670  | 0.032301271 | 0.065087837 | 0.029158599 | 2 |
| BP | GO:0002040 | 3/71 | 183/18670 | 0.032574109 | 0.06551949  | 0.029351974 | 3 |
| BP | GO:0038061 | 3/71 | 183/18670 | 0.032574109 | 0.06551949  | 0.029351974 | 3 |
| BP | GO:0043487 | 3/71 | 183/18670 | 0.032574109 | 0.06551949  | 0.029351974 | 3 |
| BP | GO:0043409 | 3/71 | 184/18670 | 0.033026035 | 0.06634889  | 0.029723536 | 3 |
| BP | GO:0050864 | 3/71 | 184/18670 | 0.033026035 | 0.06634889  | 0.029723536 | 3 |
| BP | GO:0001960 | 2/71 | 75/18670  | 0.033106087 | 0.066350694 | 0.029724344 | 2 |
| BP | GO:0006073 | 2/71 | 75/18670  | 0.033106087 | 0.066350694 | 0.029724344 | 2 |
| BP | GO:0006695 | 2/71 | 75/18670  | 0.033106087 | 0.066350694 | 0.029724344 | 2 |
| BP | GO:0044042 | 2/71 | 75/18670  | 0.033106087 | 0.066350694 | 0.029724344 | 2 |
| BP | GO:0055074 | 5/71 | 471/18670 | 0.033469051 | 0.066982471 | 0.030007373 | 5 |
| BP | GO:0007369 | 3/71 | 185/18670 | 0.033481247 | 0.066982471 | 0.030007373 | 3 |
| BP | GO:1902275 | 3/71 | 185/18670 | 0.033481247 | 0.066982471 | 0.030007373 | 3 |
| BP | GO:0000422 | 2/71 | 76/18670  | 0.033918753 | 0.067535379 | 0.03025507  | 2 |
| BP | GO:0007492 | 2/71 | 76/18670  | 0.033918753 | 0.067535379 | 0.03025507  | 2 |
| BP | GO:0019674 | 2/71 | 76/18670  | 0.033918753 | 0.067535379 | 0.03025507  | 2 |
| BP | GO:0030500 | 2/71 | 76/18670  | 0.033918753 | 0.067535379 | 0.03025507  | 2 |
| BP | GO:0045454 | 2/71 | 76/18670  | 0.033918753 | 0.067535379 | 0.03025507  | 2 |
| BP | GO:0060411 | 2/71 | 76/18670  | 0.033918753 | 0.067535379 | 0.03025507  | 2 |
| BP | GO:0061726 | 2/71 | 76/18670  | 0.033918753 | 0.067535379 | 0.03025507  | 2 |
| BP | GO:1902653 | 2/71 | 76/18670  | 0.033918753 | 0.067535379 | 0.03025507  | 2 |
| BP | GO:0022900 | 3/71 | 186/18670 | 0.03393974  | 0.067537062 | 0.030255824 | 3 |
| BP | GO:0006278 | 2/71 | 77/18670  | 0.034739198 | 0.068923392 | 0.030876883 | 2 |
| BP | GO:0031397 | 2/71 | 77/18670  | 0.034739198 | 0.068923392 | 0.030876883 | 2 |
| BP | GO:0051851 | 2/71 | 77/18670  | 0.034739198 | 0.068923392 | 0.030876883 | 2 |
| BP | GO:0061418 | 2/71 | 77/18670  | 0.034739198 | 0.068923392 | 0.030876883 | 2 |
| BP | GO:1901224 | 2/71 | 77/18670  | 0.034739198 | 0.068923392 | 0.030876883 | 2 |
| BP | GO:0043902 | 3/71 | 188/18670 | 0.03486656  | 0.069135171 | 0.030971758 | 3 |
| BP | GO:0008306 | 2/71 | 78/18670  | 0.035567354 | 0.070151376 | 0.031427006 | 2 |
| BP | GO:0008589 | 2/71 | 78/18670  | 0.035567354 | 0.070151376 | 0.031427006 | 2 |
| BP | GO:0010827 | 2/71 | 78/18670  | 0.035567354 | 0.070151376 | 0.031427006 | 2 |
| BP | GO:0030433 | 2/71 | 78/18670  | 0.035567354 | 0.070151376 | 0.031427006 | 2 |
| BP | GO:0032413 | 2/71 | 78/18670  | 0.035567354 | 0.070151376 | 0.031427006 | 2 |
| BP | GO:0042246 | 2/71 | 78/18670  | 0.035567354 | 0.070151376 | 0.031427006 | 2 |
| BP | GO:0043407 | 2/71 | 78/18670  | 0.035567354 | 0.070151376 | 0.031427006 | 2 |
| BP | GO:0055021 | 2/71 | 78/18670  | 0.035567354 | 0.070151376 | 0.031427006 | 2 |
| BP | GO:0090398 | 2/71 | 78/18670  | 0.035567354 | 0.070151376 | 0.031427006 | 2 |
| BP | GO:0043087 | 5/71 | 479/18670 | 0.035594896 | 0.070164424 | 0.031432852 | 5 |
| BP | GO:0003151 | 2/71 | 79/18670  | 0.036403152 | 0.071198508 | 0.031896109 | 2 |
| BP | GO:0021675 | 2/71 | 79/18670  | 0.036403152 | 0.071198508 | 0.031896109 | 2 |
| BP | GO:1900034 | 2/71 | 79/18670  | 0.036403152 | 0.071198508 | 0.031896109 | 2 |
| BP | GO:0034248 | 5/71 | 483/18670 | 0.03668866  | 0.071198508 | 0.031896109 | 5 |
| BP | GO:0007219 | 3/71 | 193/18670 | 0.037240781 | 0.071198508 | 0.031896109 | 3 |
| BP | GO:0002291 | 1/71 | 10/18670  | 0.03739355  | 0.071198508 | 0.031896109 | 1 |
| BP | GO:0007168 | 1/71 | 10/18670  | 0.03739355  | 0.071198508 | 0.031896109 | 1 |
| BP | GO:0010739 | 1/71 | 10/18670  | 0.03739355  | 0.071198508 | 0.031896109 | 1 |
| BP | GO:0010749 | 1/71 | 10/18670  | 0.03739355  | 0.071198508 | 0.031896109 | 1 |
| BP | GO:0010918 | 1/71 | 10/18670  | 0.03739355  | 0.071198508 | 0.031896109 | 1 |
| BP | GO:0014041 | 1/71 | 10/18670  | 0.03739355  | 0.071198508 | 0.031896109 | 1 |
| BP | GO:0016102 | 1/71 | 10/18670  | 0.03739355  | 0.071198508 | 0.031896109 | 1 |
| BP | GO:0019062 | 1/71 | 10/18670  | 0.03739355  | 0.071198508 | 0.031896109 | 1 |
| BP | GO:0021548 | 1/71 | 10/18670  | 0.03739355  | 0.071198508 | 0.031896109 | 1 |
| BP | GO:0030388 | 1/71 | 10/18670  | 0.03739355  | 0.071198508 | 0.031896109 | 1 |
| BP | GO:0030647 | 1/71 | 10/18670  | 0.03739355  | 0.071198508 | 0.031896109 | 1 |
| BP | GO:0031284 | 1/71 | 10/18670  | 0.03739355  | 0.071198508 | 0.031896109 | 1 |

|    |            |      |           |             |             |             |   |
|----|------------|------|-----------|-------------|-------------|-------------|---|
| BP | GO:0032000 | 1/71 | 10/18670  | 0.03739355  | 0.071198508 | 0.031896109 | 1 |
| BP | GO:0032070 | 1/71 | 10/18670  | 0.03739355  | 0.071198508 | 0.031896109 | 1 |
| BP | GO:0032308 | 1/71 | 10/18670  | 0.03739355  | 0.071198508 | 0.031896109 | 1 |
| BP | GO:0034085 | 1/71 | 10/18670  | 0.03739355  | 0.071198508 | 0.031896109 | 1 |
| BP | GO:0034350 | 1/71 | 10/18670  | 0.03739355  | 0.071198508 | 0.031896109 | 1 |
| BP | GO:0035865 | 1/71 | 10/18670  | 0.03739355  | 0.071198508 | 0.031896109 | 1 |
| BP | GO:0036500 | 1/71 | 10/18670  | 0.03739355  | 0.071198508 | 0.031896109 | 1 |
| BP | GO:0043653 | 1/71 | 10/18670  | 0.03739355  | 0.071198508 | 0.031896109 | 1 |
| BP | GO:0044359 | 1/71 | 10/18670  | 0.03739355  | 0.071198508 | 0.031896109 | 1 |
| BP | GO:0044557 | 1/71 | 10/18670  | 0.03739355  | 0.071198508 | 0.031896109 | 1 |
| BP | GO:0045348 | 1/71 | 10/18670  | 0.03739355  | 0.071198508 | 0.031896109 | 1 |
| BP | GO:0045657 | 1/71 | 10/18670  | 0.03739355  | 0.071198508 | 0.031896109 | 1 |
| BP | GO:0045713 | 1/71 | 10/18670  | 0.03739355  | 0.071198508 | 0.031896109 | 1 |
| BP | GO:0045741 | 1/71 | 10/18670  | 0.03739355  | 0.071198508 | 0.031896109 | 1 |
| BP | GO:0045792 | 1/71 | 10/18670  | 0.03739355  | 0.071198508 | 0.031896109 | 1 |
| BP | GO:0045945 | 1/71 | 10/18670  | 0.03739355  | 0.071198508 | 0.031896109 | 1 |
| BP | GO:0046322 | 1/71 | 10/18670  | 0.03739355  | 0.071198508 | 0.031896109 | 1 |
| BP | GO:0051133 | 1/71 | 10/18670  | 0.03739355  | 0.071198508 | 0.031896109 | 1 |
| BP | GO:0052205 | 1/71 | 10/18670  | 0.03739355  | 0.071198508 | 0.031896109 | 1 |
| BP | GO:0060068 | 1/71 | 10/18670  | 0.03739355  | 0.071198508 | 0.031896109 | 1 |
| BP | GO:0060346 | 1/71 | 10/18670  | 0.03739355  | 0.071198508 | 0.031896109 | 1 |
| BP | GO:0060513 | 1/71 | 10/18670  | 0.03739355  | 0.071198508 | 0.031896109 | 1 |
| BP | GO:0060768 | 1/71 | 10/18670  | 0.03739355  | 0.071198508 | 0.031896109 | 1 |
| BP | GO:0061299 | 1/71 | 10/18670  | 0.03739355  | 0.071198508 | 0.031896109 | 1 |
| BP | GO:0070099 | 1/71 | 10/18670  | 0.03739355  | 0.071198508 | 0.031896109 | 1 |
| BP | GO:0070341 | 1/71 | 10/18670  | 0.03739355  | 0.071198508 | 0.031896109 | 1 |
| BP | GO:0070344 | 1/71 | 10/18670  | 0.03739355  | 0.071198508 | 0.031896109 | 1 |
| BP | GO:0070942 | 1/71 | 10/18670  | 0.03739355  | 0.071198508 | 0.031896109 | 1 |
| BP | GO:0071281 | 1/71 | 10/18670  | 0.03739355  | 0.071198508 | 0.031896109 | 1 |
| BP | GO:0072124 | 1/71 | 10/18670  | 0.03739355  | 0.071198508 | 0.031896109 | 1 |
| BP | GO:0090336 | 1/71 | 10/18670  | 0.03739355  | 0.071198508 | 0.031896109 | 1 |
| BP | GO:0090557 | 1/71 | 10/18670  | 0.03739355  | 0.071198508 | 0.031896109 | 1 |
| BP | GO:0106049 | 1/71 | 10/18670  | 0.03739355  | 0.071198508 | 0.031896109 | 1 |
| BP | GO:0110096 | 1/71 | 10/18670  | 0.03739355  | 0.071198508 | 0.031896109 | 1 |
| BP | GO:0140052 | 1/71 | 10/18670  | 0.03739355  | 0.071198508 | 0.031896109 | 1 |
| BP | GO:1900122 | 1/71 | 10/18670  | 0.03739355  | 0.071198508 | 0.031896109 | 1 |
| BP | GO:1900222 | 1/71 | 10/18670  | 0.03739355  | 0.071198508 | 0.031896109 | 1 |
| BP | GO:1902101 | 1/71 | 10/18670  | 0.03739355  | 0.071198508 | 0.031896109 | 1 |
| BP | GO:1903332 | 1/71 | 10/18670  | 0.03739355  | 0.071198508 | 0.031896109 | 1 |
| BP | GO:1903799 | 1/71 | 10/18670  | 0.03739355  | 0.071198508 | 0.031896109 | 1 |
| BP | GO:1903897 | 1/71 | 10/18670  | 0.03739355  | 0.071198508 | 0.031896109 | 1 |
| BP | GO:2000425 | 1/71 | 10/18670  | 0.03739355  | 0.071198508 | 0.031896109 | 1 |
| BP | GO:2001054 | 1/71 | 10/18670  | 0.03739355  | 0.071198508 | 0.031896109 | 1 |
| BP | GO:0014032 | 2/71 | 81/18670  | 0.0380974   | 0.072210617 | 0.032349522 | 2 |
| BP | GO:0014855 | 2/71 | 81/18670  | 0.0380974   | 0.072210617 | 0.032349522 | 2 |
| BP | GO:0016126 | 2/71 | 81/18670  | 0.0380974   | 0.072210617 | 0.032349522 | 2 |
| BP | GO:0032436 | 2/71 | 81/18670  | 0.0380974   | 0.072210617 | 0.032349522 | 2 |
| BP | GO:0033238 | 2/71 | 81/18670  | 0.0380974   | 0.072210617 | 0.032349522 | 2 |
| BP | GO:0060761 | 2/71 | 81/18670  | 0.0380974   | 0.072210617 | 0.032349522 | 2 |
| BP | GO:0110110 | 2/71 | 81/18670  | 0.0380974   | 0.072210617 | 0.032349522 | 2 |
| BP | GO:2001021 | 2/71 | 81/18670  | 0.0380974   | 0.072210617 | 0.032349522 | 2 |
| BP | GO:0009205 | 4/71 | 335/18670 | 0.038723468 | 0.073355812 | 0.032862556 | 4 |
| BP | GO:0010833 | 2/71 | 82/18670  | 0.038955715 | 0.073587894 | 0.032966526 | 2 |
| BP | GO:0030279 | 2/71 | 82/18670  | 0.038955715 | 0.073587894 | 0.032966526 | 2 |
| BP | GO:0032637 | 2/71 | 82/18670  | 0.038955715 | 0.073587894 | 0.032966526 | 2 |
| BP | GO:0051702 | 2/71 | 82/18670  | 0.038955715 | 0.073587894 | 0.032966526 | 2 |
| BP | GO:0090049 | 2/71 | 82/18670  | 0.038955715 | 0.073587894 | 0.032966526 | 2 |
| BP | GO:0002221 | 3/71 | 197/18670 | 0.039198688 | 0.07400518  | 0.033153466 | 3 |
| BP | GO:0072503 | 5/71 | 493/18670 | 0.039513667 | 0.074557864 | 0.033401062 | 5 |
| BP | GO:0060541 | 3/71 | 198/18670 | 0.039696256 | 0.074818182 | 0.033517681 | 3 |
| BP | GO:0072376 | 3/71 | 198/18670 | 0.039696256 | 0.074818182 | 0.033517681 | 3 |
| BP | GO:0061013 | 3/71 | 199/18670 | 0.040197051 | 0.075638154 | 0.033885019 | 3 |
| BP | GO:0009167 | 4/71 | 340/18670 | 0.040529792 | 0.075638154 | 0.033885019 | 4 |

|    |            |      |           |             |             |             |   |
|----|------------|------|-----------|-------------|-------------|-------------|---|
| BP | GO:0002718 | 2/71 | 84/18670  | 0.040694391 | 0.075638154 | 0.033885019 | 2 |
| BP | GO:0050886 | 2/71 | 84/18670  | 0.040694391 | 0.075638154 | 0.033885019 | 2 |
| BP | GO:0060420 | 2/71 | 84/18670  | 0.040694391 | 0.075638154 | 0.033885019 | 2 |
| BP | GO:0009126 | 4/71 | 341/18670 | 0.040896766 | 0.075638154 | 0.033885019 | 4 |
| BP | GO:0009199 | 4/71 | 341/18670 | 0.040896766 | 0.075638154 | 0.033885019 | 4 |
| BP | GO:0002887 | 1/71 | 11/18670  | 0.0410562   | 0.075638154 | 0.033885019 | 1 |
| BP | GO:0006182 | 1/71 | 11/18670  | 0.0410562   | 0.075638154 | 0.033885019 | 1 |
| BP | GO:0006620 | 1/71 | 11/18670  | 0.0410562   | 0.075638154 | 0.033885019 | 1 |
| BP | GO:0006853 | 1/71 | 11/18670  | 0.0410562   | 0.075638154 | 0.033885019 | 1 |
| BP | GO:0009629 | 1/71 | 11/18670  | 0.0410562   | 0.075638154 | 0.033885019 | 1 |
| BP | GO:0016264 | 1/71 | 11/18670  | 0.0410562   | 0.075638154 | 0.033885019 | 1 |
| BP | GO:0019371 | 1/71 | 11/18670  | 0.0410562   | 0.075638154 | 0.033885019 | 1 |
| BP | GO:0031915 | 1/71 | 11/18670  | 0.0410562   | 0.075638154 | 0.033885019 | 1 |
| BP | GO:0032306 | 1/71 | 11/18670  | 0.0410562   | 0.075638154 | 0.033885019 | 1 |
| BP | GO:0033148 | 1/71 | 11/18670  | 0.0410562   | 0.075638154 | 0.033885019 | 1 |
| BP | GO:0033327 | 1/71 | 11/18670  | 0.0410562   | 0.075638154 | 0.033885019 | 1 |
| BP | GO:0033632 | 1/71 | 11/18670  | 0.0410562   | 0.075638154 | 0.033885019 | 1 |
| BP | GO:0035747 | 1/71 | 11/18670  | 0.0410562   | 0.075638154 | 0.033885019 | 1 |
| BP | GO:0036462 | 1/71 | 11/18670  | 0.0410562   | 0.075638154 | 0.033885019 | 1 |
| BP | GO:0040015 | 1/71 | 11/18670  | 0.0410562   | 0.075638154 | 0.033885019 | 1 |
| BP | GO:0045899 | 1/71 | 11/18670  | 0.0410562   | 0.075638154 | 0.033885019 | 1 |
| BP | GO:0046007 | 1/71 | 11/18670  | 0.0410562   | 0.075638154 | 0.033885019 | 1 |
| BP | GO:0048548 | 1/71 | 11/18670  | 0.0410562   | 0.075638154 | 0.033885019 | 1 |
| BP | GO:0048742 | 1/71 | 11/18670  | 0.0410562   | 0.075638154 | 0.033885019 | 1 |
| BP | GO:0060088 | 1/71 | 11/18670  | 0.0410562   | 0.075638154 | 0.033885019 | 1 |
| BP | GO:0060439 | 1/71 | 11/18670  | 0.0410562   | 0.075638154 | 0.033885019 | 1 |
| BP | GO:0060736 | 1/71 | 11/18670  | 0.0410562   | 0.075638154 | 0.033885019 | 1 |
| BP | GO:0060767 | 1/71 | 11/18670  | 0.0410562   | 0.075638154 | 0.033885019 | 1 |
| BP | GO:0060992 | 1/71 | 11/18670  | 0.0410562   | 0.075638154 | 0.033885019 | 1 |
| BP | GO:0061307 | 1/71 | 11/18670  | 0.0410562   | 0.075638154 | 0.033885019 | 1 |
| BP | GO:0061308 | 1/71 | 11/18670  | 0.0410562   | 0.075638154 | 0.033885019 | 1 |
| BP | GO:0070673 | 1/71 | 11/18670  | 0.0410562   | 0.075638154 | 0.033885019 | 1 |
| BP | GO:0072110 | 1/71 | 11/18670  | 0.0410562   | 0.075638154 | 0.033885019 | 1 |
| BP | GO:0090193 | 1/71 | 11/18670  | 0.0410562   | 0.075638154 | 0.033885019 | 1 |
| BP | GO:1900102 | 1/71 | 11/18670  | 0.0410562   | 0.075638154 | 0.033885019 | 1 |
| BP | GO:1901096 | 1/71 | 11/18670  | 0.0410562   | 0.075638154 | 0.033885019 | 1 |
| BP | GO:1901201 | 1/71 | 11/18670  | 0.0410562   | 0.075638154 | 0.033885019 | 1 |
| BP | GO:1905383 | 1/71 | 11/18670  | 0.0410562   | 0.075638154 | 0.033885019 | 1 |
| BP | GO:1905820 | 1/71 | 11/18670  | 0.0410562   | 0.075638154 | 0.033885019 | 1 |
| BP | GO:0009144 | 4/71 | 342/18670 | 0.041265645 | 0.075982266 | 0.034039177 | 4 |
| BP | GO:0048864 | 2/71 | 85/18670  | 0.04157462  | 0.076509165 | 0.034275222 | 2 |
| BP | GO:0001942 | 2/71 | 86/18670  | 0.04246202  | 0.078013782 | 0.034949273 | 2 |
| BP | GO:0030101 | 2/71 | 86/18670  | 0.04246202  | 0.078013782 | 0.034949273 | 2 |
| BP | GO:0032760 | 2/71 | 86/18670  | 0.04246202  | 0.078013782 | 0.034949273 | 2 |
| BP | GO:0097164 | 3/71 | 205/18670 | 0.043269296 | 0.079453423 | 0.035594215 | 3 |
| BP | GO:0006112 | 2/71 | 87/18670  | 0.043356527 | 0.079570024 | 0.035646451 | 2 |
| BP | GO:0009791 | 2/71 | 88/18670  | 0.044258074 | 0.080373316 | 0.036006317 | 2 |
| BP | GO:0022404 | 2/71 | 88/18670  | 0.044258074 | 0.080373316 | 0.036006317 | 2 |
| BP | GO:0022405 | 2/71 | 88/18670  | 0.044258074 | 0.080373316 | 0.036006317 | 2 |
| BP | GO:0098773 | 2/71 | 88/18670  | 0.044258074 | 0.080373316 | 0.036006317 | 2 |
| BP | GO:1903321 | 2/71 | 88/18670  | 0.044258074 | 0.080373316 | 0.036006317 | 2 |
| BP | GO:1903557 | 2/71 | 88/18670  | 0.044258074 | 0.080373316 | 0.036006317 | 2 |
| BP | GO:2000177 | 2/71 | 88/18670  | 0.044258074 | 0.080373316 | 0.036006317 | 2 |
| BP | GO:0002024 | 1/71 | 12/18670  | 0.04470511  | 0.080373316 | 0.036006317 | 1 |
| BP | GO:0002674 | 1/71 | 12/18670  | 0.04470511  | 0.080373316 | 0.036006317 | 1 |
| BP | GO:0006527 | 1/71 | 12/18670  | 0.04470511  | 0.080373316 | 0.036006317 | 1 |
| BP | GO:0009886 | 1/71 | 12/18670  | 0.04470511  | 0.080373316 | 0.036006317 | 1 |
| BP | GO:0010649 | 1/71 | 12/18670  | 0.04470511  | 0.080373316 | 0.036006317 | 1 |
| BP | GO:0010960 | 1/71 | 12/18670  | 0.04470511  | 0.080373316 | 0.036006317 | 1 |
| BP | GO:0031282 | 1/71 | 12/18670  | 0.04470511  | 0.080373316 | 0.036006317 | 1 |
| BP | GO:0032429 | 1/71 | 12/18670  | 0.04470511  | 0.080373316 | 0.036006317 | 1 |
| BP | GO:0033197 | 1/71 | 12/18670  | 0.04470511  | 0.080373316 | 0.036006317 | 1 |
| BP | GO:0034086 | 1/71 | 12/18670  | 0.04470511  | 0.080373316 | 0.036006317 | 1 |

|    |            |      |           |             |             |             |   |
|----|------------|------|-----------|-------------|-------------|-------------|---|
| BP | GO:0034088 | 1/71 | 12/18670  | 0.04470511  | 0.080373316 | 0.036006317 | 1 |
| BP | GO:0035437 | 1/71 | 12/18670  | 0.04470511  | 0.080373316 | 0.036006317 | 1 |
| BP | GO:0042118 | 1/71 | 12/18670  | 0.04470511  | 0.080373316 | 0.036006317 | 1 |
| BP | GO:0042659 | 1/71 | 12/18670  | 0.04470511  | 0.080373316 | 0.036006317 | 1 |
| BP | GO:0043922 | 1/71 | 12/18670  | 0.04470511  | 0.080373316 | 0.036006317 | 1 |
| BP | GO:0044650 | 1/71 | 12/18670  | 0.04470511  | 0.080373316 | 0.036006317 | 1 |
| BP | GO:0051095 | 1/71 | 12/18670  | 0.04470511  | 0.080373316 | 0.036006317 | 1 |
| BP | GO:0051132 | 1/71 | 12/18670  | 0.04470511  | 0.080373316 | 0.036006317 | 1 |
| BP | GO:0051873 | 1/71 | 12/18670  | 0.04470511  | 0.080373316 | 0.036006317 | 1 |
| BP | GO:0060742 | 1/71 | 12/18670  | 0.04470511  | 0.080373316 | 0.036006317 | 1 |
| BP | GO:0071472 | 1/71 | 12/18670  | 0.04470511  | 0.080373316 | 0.036006317 | 1 |
| BP | GO:0071639 | 1/71 | 12/18670  | 0.04470511  | 0.080373316 | 0.036006317 | 1 |
| BP | GO:0072520 | 1/71 | 12/18670  | 0.04470511  | 0.080373316 | 0.036006317 | 1 |
| BP | GO:0097201 | 1/71 | 12/18670  | 0.04470511  | 0.080373316 | 0.036006317 | 1 |
| BP | GO:0099550 | 1/71 | 12/18670  | 0.04470511  | 0.080373316 | 0.036006317 | 1 |
| BP | GO:0099640 | 1/71 | 12/18670  | 0.04470511  | 0.080373316 | 0.036006317 | 1 |
| BP | GO:1902337 | 1/71 | 12/18670  | 0.04470511  | 0.080373316 | 0.036006317 | 1 |
| BP | GO:1902510 | 1/71 | 12/18670  | 0.04470511  | 0.080373316 | 0.036006317 | 1 |
| BP | GO:1905461 | 1/71 | 12/18670  | 0.04470511  | 0.080373316 | 0.036006317 | 1 |
| BP | GO:2001053 | 1/71 | 12/18670  | 0.04470511  | 0.080373316 | 0.036006317 | 1 |
| BP | GO:2001223 | 1/71 | 12/18670  | 0.04470511  | 0.080373316 | 0.036006317 | 1 |
| BP | GO:0032410 | 2/71 | 89/18670  | 0.045166599 | 0.081159489 | 0.036358513 | 2 |
| BP | GO:0009161 | 4/71 | 354/18670 | 0.045840705 | 0.082326665 | 0.036881395 | 4 |
| BP | GO:0050707 | 3/71 | 210/18670 | 0.04591726  | 0.082420006 | 0.036923211 | 3 |
| BP | GO:0001656 | 2/71 | 90/18670  | 0.046082035 | 0.082494962 | 0.03695679  | 2 |
| BP | GO:0014033 | 2/71 | 90/18670  | 0.046082035 | 0.082494962 | 0.03695679  | 2 |
| BP | GO:0030641 | 2/71 | 90/18670  | 0.046082035 | 0.082494962 | 0.03695679  | 2 |
| BP | GO:0031058 | 2/71 | 90/18670  | 0.046082035 | 0.082494962 | 0.03695679  | 2 |
| BP | GO:0051304 | 2/71 | 90/18670  | 0.046082035 | 0.082494962 | 0.03695679  | 2 |
| BP | GO:1904063 | 2/71 | 91/18670  | 0.04700432  | 0.084101112 | 0.037676327 | 2 |
| BP | GO:0019319 | 2/71 | 92/18670  | 0.047933388 | 0.084507366 | 0.037858324 | 2 |
| BP | GO:0006936 | 4/71 | 360/18670 | 0.048231009 | 0.084507366 | 0.037858324 | 4 |
| BP | GO:0001765 | 1/71 | 13/18670  | 0.04834033  | 0.084507366 | 0.037858324 | 1 |
| BP | GO:0002093 | 1/71 | 13/18670  | 0.04834033  | 0.084507366 | 0.037858324 | 1 |
| BP | GO:0006596 | 1/71 | 13/18670  | 0.04834033  | 0.084507366 | 0.037858324 | 1 |
| BP | GO:0007171 | 1/71 | 13/18670  | 0.04834033  | 0.084507366 | 0.037858324 | 1 |
| BP | GO:0007494 | 1/71 | 13/18670  | 0.04834033  | 0.084507366 | 0.037858324 | 1 |
| BP | GO:0009635 | 1/71 | 13/18670  | 0.04834033  | 0.084507366 | 0.037858324 | 1 |
| BP | GO:0010763 | 1/71 | 13/18670  | 0.04834033  | 0.084507366 | 0.037858324 | 1 |
| BP | GO:0010838 | 1/71 | 13/18670  | 0.04834033  | 0.084507366 | 0.037858324 | 1 |
| BP | GO:0014745 | 1/71 | 13/18670  | 0.04834033  | 0.084507366 | 0.037858324 | 1 |
| BP | GO:0014842 | 1/71 | 13/18670  | 0.04834033  | 0.084507366 | 0.037858324 | 1 |
| BP | GO:0019896 | 1/71 | 13/18670  | 0.04834033  | 0.084507366 | 0.037858324 | 1 |
| BP | GO:0032096 | 1/71 | 13/18670  | 0.04834033  | 0.084507366 | 0.037858324 | 1 |
| BP | GO:0032099 | 1/71 | 13/18670  | 0.04834033  | 0.084507366 | 0.037858324 | 1 |
| BP | GO:0032725 | 1/71 | 13/18670  | 0.04834033  | 0.084507366 | 0.037858324 | 1 |
| BP | GO:0033004 | 1/71 | 13/18670  | 0.04834033  | 0.084507366 | 0.037858324 | 1 |
| BP | GO:0033127 | 1/71 | 13/18670  | 0.04834033  | 0.084507366 | 0.037858324 | 1 |
| BP | GO:0035641 | 1/71 | 13/18670  | 0.04834033  | 0.084507366 | 0.037858324 | 1 |
| BP | GO:0042415 | 1/71 | 13/18670  | 0.04834033  | 0.084507366 | 0.037858324 | 1 |
| BP | GO:0042532 | 1/71 | 13/18670  | 0.04834033  | 0.084507366 | 0.037858324 | 1 |
| BP | GO:0042538 | 1/71 | 13/18670  | 0.04834033  | 0.084507366 | 0.037858324 | 1 |
| BP | GO:0043301 | 1/71 | 13/18670  | 0.04834033  | 0.084507366 | 0.037858324 | 1 |
| BP | GO:0045820 | 1/71 | 13/18670  | 0.04834033  | 0.084507366 | 0.037858324 | 1 |
| BP | GO:0047484 | 1/71 | 13/18670  | 0.04834033  | 0.084507366 | 0.037858324 | 1 |
| BP | GO:0048681 | 1/71 | 13/18670  | 0.04834033  | 0.084507366 | 0.037858324 | 1 |
| BP | GO:0050722 | 1/71 | 13/18670  | 0.04834033  | 0.084507366 | 0.037858324 | 1 |
| BP | GO:0050872 | 1/71 | 13/18670  | 0.04834033  | 0.084507366 | 0.037858324 | 1 |
| BP | GO:0051001 | 1/71 | 13/18670  | 0.04834033  | 0.084507366 | 0.037858324 | 1 |
| BP | GO:0060100 | 1/71 | 13/18670  | 0.04834033  | 0.084507366 | 0.037858324 | 1 |
| BP | GO:0060601 | 1/71 | 13/18670  | 0.04834033  | 0.084507366 | 0.037858324 | 1 |
| BP | GO:0060712 | 1/71 | 13/18670  | 0.04834033  | 0.084507366 | 0.037858324 | 1 |
| BP | GO:0061042 | 1/71 | 13/18670  | 0.04834033  | 0.084507366 | 0.037858324 | 1 |

|    |            |       |           |             |             |             |    |
|----|------------|-------|-----------|-------------|-------------|-------------|----|
| BP | GO:0061052 | 1/71  | 13/18670  | 0.04834033  | 0.084507366 | 0.037858324 | 1  |
| BP | GO:0061430 | 1/71  | 13/18670  | 0.04834033  | 0.084507366 | 0.037858324 | 1  |
| BP | GO:0071287 | 1/71  | 13/18670  | 0.04834033  | 0.084507366 | 0.037858324 | 1  |
| BP | GO:0072044 | 1/71  | 13/18670  | 0.04834033  | 0.084507366 | 0.037858324 | 1  |
| BP | GO:0097152 | 1/71  | 13/18670  | 0.04834033  | 0.084507366 | 0.037858324 | 1  |
| BP | GO:0098903 | 1/71  | 13/18670  | 0.04834033  | 0.084507366 | 0.037858324 | 1  |
| BP | GO:1900103 | 1/71  | 13/18670  | 0.04834033  | 0.084507366 | 0.037858324 | 1  |
| BP | GO:1901550 | 1/71  | 13/18670  | 0.04834033  | 0.084507366 | 0.037858324 | 1  |
| BP | GO:1903140 | 1/71  | 13/18670  | 0.04834033  | 0.084507366 | 0.037858324 | 1  |
| BP | GO:1903960 | 1/71  | 13/18670  | 0.04834033  | 0.084507366 | 0.037858324 | 1  |
| BP | GO:1905155 | 1/71  | 13/18670  | 0.04834033  | 0.084507366 | 0.037858324 | 1  |
| BP | GO:0002460 | 4/71  | 361/18670 | 0.048636047 | 0.084950037 | 0.038056635 | 4  |
| BP | GO:0019935 | 3/71  | 215/18670 | 0.04864422  | 0.084950037 | 0.038056635 | 3  |
| BP | GO:0006476 | 2/71  | 93/18670  | 0.048869178 | 0.085254087 | 0.038192846 | 2  |
| BP | GO:0032092 | 2/71  | 93/18670  | 0.048869178 | 0.085254087 | 0.038192846 | 2  |
| BP | GO:0009141 | 4/71  | 362/18670 | 0.049042984 | 0.085512805 | 0.038308749 | 4  |
| BP | GO:0002699 | 3/71  | 216/18670 | 0.049199023 | 0.085740293 | 0.038410661 | 3  |
| BP | GO:0060348 | 3/71  | 217/18670 | 0.049756947 | 0.086667556 | 0.038826064 | 3  |
| BP | GO:0051289 | 2/71  | 94/18670  | 0.049811626 | 0.086717748 | 0.038848549 | 2  |
| CC | GO:0045121 | 12/71 | 315/19717 | 1.24E-09    | 1.39E-07    | 1.07E-07    | 12 |
| CC | GO:0098857 | 12/71 | 316/19717 | 1.28E-09    | 1.39E-07    | 1.07E-07    | 12 |
| CC | GO:0098589 | 12/71 | 328/19717 | 1.95E-09    | 1.41E-07    | 1.08E-07    | 12 |
| CC | GO:0090575 | 9/71  | 163/19717 | 6.94E-09    | 3.77E-07    | 2.89E-07    | 9  |
| CC | GO:0044798 | 9/71  | 201/19717 | 4.29E-08    | 1.86E-06    | 1.43E-06    | 9  |
| CC | GO:0005667 | 10/71 | 365/19717 | 7.08E-07    | 2.56E-05    | 1.96E-05    | 10 |
| CC | GO:0044853 | 6/71  | 109/19717 | 2.66E-06    | 8.24E-05    | 6.31E-05    | 6  |
| CC | GO:0000790 | 9/71  | 377/19717 | 8.13E-06    | 0.000220522 | 0.000169015 | 9  |
| CC | GO:0005901 | 5/71  | 80/19717  | 1.02E-05    | 0.000246647 | 0.000189038 | 5  |
| CC | GO:0045177 | 8/71  | 384/19717 | 7.02E-05    | 0.001523222 | 0.001167446 | 8  |
| CC | GO:0009897 | 8/71  | 393/19717 | 8.25E-05    | 0.001627235 | 0.001247165 | 8  |
| CC | GO:0120111 | 4/71  | 84/19717  | 0.000239666 | 0.004125275 | 0.003161743 | 4  |
| CC | GO:0009925 | 3/71  | 34/19717  | 0.000247136 | 0.004125275 | 0.003161743 | 3  |
| CC | GO:0005925 | 7/71  | 405/19717 | 0.000628868 | 0.00882527  | 0.006763971 | 7  |
| CC | GO:0062023 | 7/71  | 406/19717 | 0.000638087 | 0.00882527  | 0.006763971 | 7  |
| CC | GO:0005924 | 7/71  | 408/19717 | 0.000656849 | 0.00882527  | 0.006763971 | 7  |
| CC | GO:0030055 | 7/71  | 412/19717 | 0.000695688 | 0.00882527  | 0.006763971 | 7  |
| CC | GO:0043209 | 3/71  | 49/19717  | 0.00073205  | 0.00882527  | 0.006763971 | 3  |
| CC | GO:0030139 | 6/71  | 303/19717 | 0.000776667 | 0.008870356 | 0.006798527 | 6  |
| CC | GO:0045178 | 3/71  | 51/19717  | 0.000823201 | 0.008885141 | 0.006809858 | 3  |
| CC | GO:0005788 | 6/71  | 309/19717 | 0.000859852 | 0.008885141 | 0.006809858 | 6  |
| CC | GO:0032838 | 5/71  | 208/19717 | 0.000921699 | 0.009091306 | 0.00696787  | 5  |
| CC | GO:0016324 | 6/71  | 318/19717 | 0.000997353 | 0.009409807 | 0.007211979 | 6  |
| CC | GO:1904115 | 3/71  | 57/19717  | 0.001138916 | 0.010297703 | 0.007892491 | 3  |
| CC | GO:0016327 | 2/71  | 18/19717  | 0.001884461 | 0.016357126 | 0.012536628 | 2  |
| CC | GO:0046930 | 2/71  | 23/19717  | 0.003080117 | 0.025707132 | 0.019702774 | 2  |
| CC | GO:0005741 | 4/71  | 178/19717 | 0.003897899 | 0.031327562 | 0.024010452 | 4  |
| CC | GO:0032839 | 2/71  | 32/19717  | 0.005913662 | 0.044760773 | 0.034306098 | 2  |
| CC | GO:0031968 | 4/71  | 201/19717 | 0.005981854 | 0.044760773 | 0.034306098 | 4  |
| CC | GO:0019867 | 4/71  | 203/19717 | 0.006192095 | 0.044789486 | 0.034328104 | 4  |
| CC | GO:0031983 | 5/71  | 339/19717 | 0.007523074 | 0.052661515 | 0.040361482 | 5  |
| CC | GO:0016323 | 4/71  | 217/19717 | 0.007802794 | 0.052912694 | 0.040553993 | 4  |
| CC | GO:0005819 | 5/71  | 347/19717 | 0.00827541  | 0.054417092 | 0.041707012 | 5  |
| CC | GO:0005769 | 5/71  | 350/19717 | 0.008570567 | 0.054700383 | 0.041924135 | 5  |
| CC | GO:0043025 | 6/71  | 497/19717 | 0.008952508 | 0.055505552 | 0.042541243 | 6  |
| CC | GO:0000307 | 2/71  | 42/19717  | 0.010030515 | 0.059641167 | 0.045710911 | 2  |
| CC | GO:1904813 | 3/71  | 124/19717 | 0.010169231 | 0.059641167 | 0.045710911 | 3  |
| MF | GO:0031625 | 11/71 | 290/17697 | 2.03E-08    | 5.79E-06    | 3.62E-06    | 11 |
| MF | GO:0044389 | 11/71 | 308/17697 | 3.76E-08    | 5.79E-06    | 3.62E-06    | 11 |
| MF | GO:0001085 | 8/71  | 155/17697 | 1.93E-07    | 1.55E-05    | 9.68E-06    | 8  |
| MF | GO:0005126 | 10/71 | 286/17697 | 2.01E-07    | 1.55E-05    | 9.68E-06    | 10 |
| MF | GO:0048018 | 12/71 | 482/17697 | 4.33E-07    | 2.67E-05    | 1.67E-05    | 12 |
| MF | GO:0019902 | 8/71  | 185/17697 | 7.43E-07    | 3.50E-05    | 2.19E-05    | 8  |
| MF | GO:0002020 | 7/71  | 128/17697 | 7.95E-07    | 3.50E-05    | 2.19E-05    | 7  |

|    |            |       |           |             |             |             |    |
|----|------------|-------|-----------|-------------|-------------|-------------|----|
| MF | GO:0005178 | 7/71  | 132/17697 | 9.79E-07    | 3.77E-05    | 2.36E-05    | 7  |
| MF | GO:0005125 | 8/71  | 220/17697 | 2.73E-06    | 9.33E-05    | 5.84E-05    | 8  |
| MF | GO:0004252 | 7/71  | 160/17697 | 3.54E-06    | 0.000109141 | 6.83E-05    | 7  |
| MF | GO:0051400 | 3/71  | 10/17697  | 7.28E-06    | 0.000176925 | 0.000110653 | 3  |
| MF | GO:0070513 | 3/71  | 10/17697  | 7.28E-06    | 0.000176925 | 0.000110653 | 3  |
| MF | GO:0004175 | 10/71 | 427/17697 | 7.47E-06    | 0.000176925 | 0.000110653 | 10 |
| MF | GO:0008236 | 7/71  | 182/17697 | 8.28E-06    | 0.000182101 | 0.000113891 | 7  |
| MF | GO:0017171 | 7/71  | 186/17697 | 9.54E-06    | 0.000195902 | 0.000122523 | 7  |
| MF | GO:0019903 | 6/71  | 140/17697 | 2.07E-05    | 0.000397815 | 0.000248804 | 6  |
| MF | GO:0097153 | 3/71  | 15/17697  | 2.72E-05    | 0.000492791 | 0.000308205 | 3  |
| MF | GO:0004879 | 4/71  | 47/17697  | 3.72E-05    | 0.00060368  | 0.000377558 | 4  |
| MF | GO:0098531 | 4/71  | 47/17697  | 3.72E-05    | 0.00060368  | 0.000377558 | 4  |
| MF | GO:0051087 | 5/71  | 102/17697 | 5.55E-05    | 0.000854604 | 0.000534493 | 5  |
| MF | GO:0003707 | 4/71  | 56/17697  | 7.46E-05    | 0.001094529 | 0.000684548 | 4  |
| MF | GO:0019887 | 6/71  | 180/17697 | 8.43E-05    | 0.001180891 | 0.000738561 | 6  |
| MF | GO:0019207 | 6/71  | 207/17697 | 0.000181235 | 0.002421368 | 0.00151439  | 6  |
| MF | GO:0070491 | 4/71  | 71/17697  | 0.000188678 | 0.002421368 | 0.00151439  | 4  |
| MF | GO:0020037 | 5/71  | 135/17697 | 0.000208546 | 0.002569281 | 0.001606898 | 5  |
| MF | GO:0019838 | 5/71  | 137/17697 | 0.00022332  | 0.002645479 | 0.001654554 | 5  |
| MF | GO:0030291 | 3/71  | 32/17697  | 0.000282347 | 0.003085698 | 0.001929879 | 3  |
| MF | GO:0051721 | 3/71  | 32/17697  | 0.000282347 | 0.003085698 | 0.001929879 | 3  |
| MF | GO:0046906 | 5/71  | 145/17697 | 0.000290536 | 0.003085698 | 0.001929879 | 5  |
| MF | GO:0097718 | 3/71  | 33/17697  | 0.000309691 | 0.003179492 | 0.001988541 | 3  |
| MF | GO:0005504 | 3/71  | 34/17697  | 0.000338686 | 0.00331252  | 0.00207174  | 3  |
| MF | GO:0051219 | 4/71  | 83/17697  | 0.000344158 | 0.00331252  | 0.00207174  | 4  |
| MF | GO:0001228 | 8/71  | 439/17697 | 0.000364611 | 0.003317004 | 0.002074544 | 8  |
| MF | GO:0001103 | 3/71  | 35/17697  | 0.000369375 | 0.003317004 | 0.002074544 | 3  |
| MF | GO:0033613 | 4/71  | 85/17697  | 0.000376932 | 0.003317004 | 0.002074544 | 4  |
| MF | GO:0016705 | 5/71  | 159/17697 | 0.000443848 | 0.003797366 | 0.002374976 | 5  |
| MF | GO:0016248 | 3/71  | 38/17697  | 0.000472012 | 0.003929178 | 0.002457415 | 3  |
| MF | GO:0032813 | 3/71  | 46/17697  | 0.000830075 | 0.00656557  | 0.004106286 | 3  |
| MF | GO:0050839 | 8/71  | 499/17697 | 0.000846245 | 0.00656557  | 0.004106286 | 8  |
| MF | GO:0045236 | 2/71  | 11/17697  | 0.000852671 | 0.00656557  | 0.004106286 | 2  |
| MF | GO:0008009 | 3/71  | 49/17697  | 0.000998835 | 0.007384713 | 0.0046186   | 3  |
| MF | GO:0004861 | 2/71  | 12/17697  | 0.001020553 | 0.007384713 | 0.0046186   | 2  |
| MF | GO:0042826 | 4/71  | 111/17697 | 0.001030983 | 0.007384713 | 0.0046186   | 4  |
| MF | GO:0015459 | 3/71  | 52/17697  | 0.001187868 | 0.008227779 | 0.005145877 | 3  |
| MF | GO:0016653 | 2/71  | 13/17697  | 0.001202981 | 0.008227779 | 0.005145877 | 2  |
| MF | GO:0001102 | 3/71  | 53/17697  | 0.001255538 | 0.008227779 | 0.005145877 | 3  |
| MF | GO:0005080 | 3/71  | 53/17697  | 0.001255538 | 0.008227779 | 0.005145877 | 3  |
| MF | GO:0031072 | 4/71  | 119/17697 | 0.001334495 | 0.008563007 | 0.005355537 | 4  |
| MF | GO:0036041 | 2/71  | 14/17697  | 0.001399841 | 0.008799    | 0.005503134 | 2  |
| MF | GO:0005507 | 3/71  | 59/17697  | 0.00171267  | 0.010343184 | 0.006468909 | 3  |
| MF | GO:0097110 | 3/71  | 59/17697  | 0.00171267  | 0.010343184 | 0.006468909 | 3  |
| MF | GO:0005149 | 2/71  | 16/17697  | 0.001836393 | 0.010877098 | 0.006802833 | 2  |
| MF | GO:0004860 | 3/71  | 63/17697  | 0.002068286 | 0.011840072 | 0.007405103 | 3  |
| MF | GO:0005123 | 2/71  | 17/17697  | 0.002075857 | 0.011840072 | 0.007405103 | 2  |
| MF | GO:0033293 | 3/71  | 64/17697  | 0.002163807 | 0.01211732  | 0.007578502 | 3  |
| MF | GO:0042379 | 3/71  | 66/17697  | 0.00236298  | 0.012996388 | 0.008128295 | 3  |
| MF | GO:0019210 | 3/71  | 67/17697  | 0.002466683 | 0.013098936 | 0.008192431 | 3  |
| MF | GO:0030374 | 3/71  | 67/17697  | 0.002466683 | 0.013098936 | 0.008192431 | 3  |
| MF | GO:0016247 | 4/71  | 144/17697 | 0.002678373 | 0.013982015 | 0.008744733 | 4  |
| MF | GO:0001091 | 2/71  | 20/17697  | 0.002877638 | 0.014771876 | 0.009238733 | 2  |
| MF | GO:0001618 | 3/71  | 74/17697  | 0.003271773 | 0.016253325 | 0.010165272 | 3  |
| MF | GO:0104005 | 3/71  | 74/17697  | 0.003271773 | 0.016253325 | 0.010165272 | 3  |
| MF | GO:0044183 | 2/71  | 23/17697  | 0.003802158 | 0.018297884 | 0.011443995 | 2  |
| MF | GO:0070412 | 2/71  | 23/17697  | 0.003802158 | 0.018297884 | 0.011443995 | 2  |
| MF | GO:0030295 | 3/71  | 80/17697  | 0.004076348 | 0.019022958 | 0.011897475 | 3  |
| MF | GO:0046332 | 3/71  | 80/17697  | 0.004076348 | 0.019022958 | 0.011897475 | 3  |
| MF | GO:0016209 | 3/71  | 86/17697  | 0.004991452 | 0.022608343 | 0.014139873 | 3  |
| MF | GO:0019209 | 3/71  | 86/17697  | 0.004991452 | 0.022608343 | 0.014139873 | 3  |
| MF | GO:0035035 | 2/71  | 29/17697  | 0.006007566 | 0.02681638  | 0.016771694 | 2  |
| MF | GO:0043325 | 2/71  | 30/17697  | 0.006420074 | 0.028248326 | 0.017667272 | 2  |

|    |            |      |           |             |             |             |   |
|----|------------|------|-----------|-------------|-------------|-------------|---|
| MF | GO:0051427 | 4/71 | 185/17697 | 0.006515069 | 0.028262554 | 0.01767617  | 4 |
| MF | GO:0005164 | 2/71 | 31/17697  | 0.00684514  | 0.029281989 | 0.018313753 | 2 |
| MF | GO:0016712 | 2/71 | 32/17697  | 0.00728266  | 0.030683892 | 0.019190541 | 2 |
| MF | GO:0004497 | 3/71 | 99/17697  | 0.007372104 | 0.030683892 | 0.019190541 | 3 |
| MF | GO:0031406 | 4/71 | 193/17697 | 0.00754547  | 0.030986729 | 0.019379943 | 4 |
| MF | GO:0004222 | 3/71 | 103/17697 | 0.008218243 | 0.033305512 | 0.020830173 | 3 |
| MF | GO:0003713 | 5/71 | 319/17697 | 0.009105038 | 0.035693702 | 0.022323813 | 5 |
| MF | GO:0016651 | 3/71 | 107/17697 | 0.009119357 | 0.035693702 | 0.022323813 | 3 |
| MF | GO:0019825 | 2/71 | 36/17697  | 0.009155203 | 0.035693702 | 0.022323813 | 2 |
| MF | GO:0043177 | 4/71 | 205/17697 | 0.009284081 | 0.03574371  | 0.022355089 | 4 |
| MF | GO:0008200 | 2/71 | 37/17697  | 0.009653443 | 0.03670692  | 0.022957506 | 2 |
| MF | GO:0008395 | 2/71 | 38/17697  | 0.010163523 | 0.038175183 | 0.023875798 | 2 |
| MF | GO:0016709 | 2/71 | 39/17697  | 0.010685341 | 0.039651628 | 0.024799207 | 2 |
| MF | GO:0009055 | 3/71 | 114/17697 | 0.010830747 | 0.03971274  | 0.024837428 | 3 |
| MF | GO:0001784 | 2/71 | 40/17697  | 0.011218799 | 0.040651649 | 0.025424647 | 2 |
| MF | GO:0004197 | 3/71 | 116/17697 | 0.011351532 | 0.040654323 | 0.025426319 | 3 |
| MF | GO:0051879 | 2/71 | 41/17697  | 0.011763797 | 0.041603053 | 0.026019681 | 2 |
| MF | GO:0099106 | 3/71 | 118/17697 | 0.011886587 | 0.041603053 | 0.026019681 | 3 |
| MF | GO:0030544 | 2/71 | 42/17697  | 0.012320237 | 0.042636327 | 0.026665919 | 2 |
| MF | GO:0004712 | 2/71 | 43/17697  | 0.012888021 | 0.044105673 | 0.027584888 | 2 |
| MF | GO:0001046 | 2/71 | 45/17697  | 0.014057233 | 0.047578326 | 0.02975678  | 2 |
| MF | GO:0001227 | 4/71 | 242/17697 | 0.016224775 | 0.054317724 | 0.033971782 | 4 |
| MF | GO:0016538 | 2/71 | 49/17697  | 0.016527541 | 0.054678282 | 0.034197285 | 2 |
| MF | GO:0070851 | 3/71 | 134/17697 | 0.016687528 | 0.054678282 | 0.034197285 | 3 |
| MF | GO:0070888 | 2/71 | 50/17697  | 0.01717204  | 0.055526364 | 0.034727699 | 2 |
| MF | GO:0004857 | 5/71 | 375/17697 | 0.017306919 | 0.055526364 | 0.034727699 | 5 |
| MF | GO:0045309 | 2/71 | 51/17697  | 0.017827121 | 0.056605705 | 0.035402748 | 2 |
| MF | GO:0001047 | 2/71 | 55/17697  | 0.020551416 | 0.064590165 | 0.040396446 | 2 |
| MF | GO:0043621 | 2/71 | 56/17697  | 0.021258025 | 0.066136078 | 0.041363303 | 2 |
| MF | GO:0035257 | 3/71 | 152/17697 | 0.023211867 | 0.07149255  | 0.044713385 | 3 |
| MF | GO:0004714 | 2/71 | 62/17697  | 0.025705269 | 0.078388346 | 0.049026204 | 2 |

#### KEGG analysis

| ID       | GeneRatio | BgRatio  | pvalue   | p.adjust | qvalue   | Count |
|----------|-----------|----------|----------|----------|----------|-------|
| hsa05418 | 22/69     | 139/8111 | 7.62E-23 | 1.56E-20 | 5.95E-21 | 22    |
| hsa05417 | 25/69     | 215/8111 | 1.41E-22 | 1.56E-20 | 5.95E-21 | 25    |
| hsa04933 | 18/69     | 100/8111 | 9.12E-20 | 6.72E-18 | 2.56E-18 | 18    |
| hsa01524 | 13/69     | 73/8111  | 2.16E-14 | 1.18E-12 | 4.50E-13 | 13    |
| hsa04657 | 14/69     | 94/8111  | 2.67E-14 | 1.18E-12 | 4.50E-13 | 14    |
| hsa05161 | 16/69     | 162/8111 | 2.33E-13 | 8.60E-12 | 3.28E-12 | 16    |
| hsa04668 | 14/69     | 112/8111 | 3.28E-13 | 1.04E-11 | 3.95E-12 | 14    |
| hsa05219 | 10/69     | 41/8111  | 9.19E-13 | 2.46E-11 | 9.36E-12 | 10    |
| hsa05215 | 13/69     | 97/8111  | 1.00E-12 | 2.46E-11 | 9.36E-12 | 13    |
| hsa01522 | 13/69     | 98/8111  | 1.15E-12 | 2.53E-11 | 9.65E-12 | 13    |
| hsa05160 | 15/69     | 157/8111 | 2.36E-12 | 4.74E-11 | 1.80E-11 | 15    |
| hsa05167 | 16/69     | 194/8111 | 3.89E-12 | 7.16E-11 | 2.73E-11 | 16    |
| hsa05210 | 12/69     | 86/8111  | 4.95E-12 | 8.41E-11 | 3.21E-11 | 12    |
| hsa05207 | 16/69     | 212/8111 | 1.52E-11 | 2.40E-10 | 9.13E-11 | 16    |
| hsa05163 | 16/69     | 225/8111 | 3.75E-11 | 5.53E-10 | 2.11E-10 | 16    |
| hsa05222 | 11/69     | 92/8111  | 2.31E-10 | 3.19E-09 | 1.22E-09 | 11    |
| hsa04115 | 10/69     | 73/8111  | 4.11E-10 | 5.35E-09 | 2.04E-09 | 10    |
| hsa05212 | 10/69     | 76/8111  | 6.19E-10 | 7.60E-09 | 2.90E-09 | 10    |
| hsa05225 | 13/69     | 168/8111 | 1.15E-09 | 1.31E-08 | 4.98E-09 | 13    |
| hsa04210 | 12/69     | 136/8111 | 1.18E-09 | 1.31E-08 | 4.98E-09 | 12    |
| hsa04066 | 11/69     | 109/8111 | 1.47E-09 | 1.47E-08 | 5.61E-09 | 11    |
| hsa05162 | 12/69     | 139/8111 | 1.52E-09 | 1.47E-08 | 5.61E-09 | 12    |
| hsa05164 | 13/69     | 172/8111 | 1.53E-09 | 1.47E-08 | 5.61E-09 | 13    |
| hsa04932 | 12/69     | 155/8111 | 5.34E-09 | 4.91E-08 | 1.87E-08 | 12    |
| hsa04215 | 7/69      | 32/8111  | 6.72E-09 | 5.94E-08 | 2.26E-08 | 7     |
| hsa05223 | 9/69      | 72/8111  | 7.59E-09 | 6.45E-08 | 2.46E-08 | 9     |
| hsa05169 | 13/69     | 202/8111 | 1.09E-08 | 8.95E-08 | 3.41E-08 | 13    |
| hsa05142 | 10/69     | 102/8111 | 1.16E-08 | 9.17E-08 | 3.50E-08 | 10    |

|          |       |          |             |             |             |    |
|----------|-------|----------|-------------|-------------|-------------|----|
| hsa05208 | 13/69 | 223/8111 | 3.58E-08    | 2.73E-07    | 1.04E-07    | 13 |
| hsa05323 | 9/69  | 93/8111  | 7.45E-08    | 5.49E-07    | 2.09E-07    | 9  |
| hsa04926 | 10/69 | 129/8111 | 1.12E-07    | 7.99E-07    | 3.04E-07    | 10 |
| hsa05205 | 12/69 | 205/8111 | 1.23E-07    | 8.46E-07    | 3.22E-07    | 12 |
| hsa05218 | 8/69  | 72/8111  | 1.41E-07    | 9.42E-07    | 3.59E-07    | 8  |
| hsa05144 | 7/69  | 50/8111  | 1.77E-07    | 1.15E-06    | 4.37E-07    | 7  |
| hsa05214 | 8/69  | 75/8111  | 1.94E-07    | 1.21E-06    | 4.62E-07    | 8  |
| hsa04620 | 9/69  | 104/8111 | 1.98E-07    | 1.21E-06    | 4.62E-07    | 9  |
| hsa04915 | 10/69 | 138/8111 | 2.12E-07    | 1.22E-06    | 4.66E-07    | 10 |
| hsa05133 | 8/69  | 76/8111  | 2.16E-07    | 1.22E-06    | 4.66E-07    | 8  |
| hsa05220 | 8/69  | 76/8111  | 2.16E-07    | 1.22E-06    | 4.66E-07    | 8  |
| hsa05140 | 8/69  | 77/8111  | 2.39E-07    | 1.32E-06    | 5.03E-07    | 8  |
| hsa01521 | 8/69  | 79/8111  | 2.92E-07    | 1.58E-06    | 6.01E-07    | 8  |
| hsa05145 | 9/69  | 112/8111 | 3.75E-07    | 1.97E-06    | 7.51E-07    | 9  |
| hsa05224 | 10/69 | 147/8111 | 3.83E-07    | 1.97E-06    | 7.51E-07    | 10 |
| hsa05213 | 7/69  | 58/8111  | 5.04E-07    | 2.53E-06    | 9.64E-07    | 7  |
| hsa04218 | 10/69 | 156/8111 | 6.66E-07    | 3.27E-06    | 1.25E-06    | 10 |
| hsa05130 | 11/69 | 197/8111 | 6.99E-07    | 3.36E-06    | 1.28E-06    | 11 |
| hsa04010 | 13/69 | 294/8111 | 8.91E-07    | 4.19E-06    | 1.60E-06    | 13 |
| hsa04380 | 9/69  | 128/8111 | 1.17E-06    | 5.37E-06    | 2.05E-06    | 9  |
| hsa04151 | 14/69 | 354/8111 | 1.22E-06    | 5.51E-06    | 2.10E-06    | 14 |
| hsa05166 | 11/69 | 219/8111 | 1.99E-06    | 8.80E-06    | 3.35E-06    | 11 |
| hsa04064 | 8/69  | 104/8111 | 2.44E-06    | 1.05E-05    | 4.00E-06    | 8  |
| hsa05152 | 10/69 | 180/8111 | 2.47E-06    | 1.05E-05    | 4.00E-06    | 10 |
| hsa04659 | 8/69  | 108/8111 | 3.25E-06    | 1.35E-05    | 5.16E-06    | 8  |
| hsa05165 | 13/69 | 331/8111 | 3.36E-06    | 1.38E-05    | 5.24E-06    | 13 |
| hsa05171 | 11/69 | 232/8111 | 3.49E-06    | 1.40E-05    | 5.35E-06    | 11 |
| hsa05226 | 9/69  | 149/8111 | 4.15E-06    | 1.64E-05    | 6.23E-06    | 9  |
| hsa05202 | 10/69 | 192/8111 | 4.42E-06    | 1.71E-05    | 6.52E-06    | 10 |
| hsa05132 | 11/69 | 249/8111 | 6.90E-06    | 2.63E-05    | 1.00E-05    | 11 |
| hsa05235 | 7/69  | 89/8111  | 9.38E-06    | 3.51E-05    | 1.34E-05    | 7  |
| hsa04370 | 6/69  | 59/8111  | 9.60E-06    | 3.54E-05    | 1.35E-05    | 6  |
| hsa05206 | 12/69 | 310/8111 | 9.77E-06    | 3.54E-05    | 1.35E-05    | 12 |
| hsa05416 | 6/69  | 60/8111  | 1.06E-05    | 3.73E-05    | 1.42E-05    | 6  |
| hsa05170 | 10/69 | 212/8111 | 1.06E-05    | 3.73E-05    | 1.42E-05    | 10 |
| hsa05216 | 5/69  | 37/8111  | 1.36E-05    | 4.69E-05    | 1.79E-05    | 5  |
| hsa04621 | 9/69  | 185/8111 | 2.40E-05    | 8.15E-05    | 3.10E-05    | 9  |
| hsa04625 | 7/69  | 104/8111 | 2.61E-05    | 8.75E-05    | 3.34E-05    | 7  |
| hsa05131 | 10/69 | 247/8111 | 4.00E-05    | 0.000131931 | 5.03E-05    | 10 |
| hsa04012 | 6/69  | 85/8111  | 7.84E-05    | 0.00025476  | 9.71E-05    | 6  |
| hsa05020 | 10/69 | 273/8111 | 9.30E-05    | 0.000297874 | 0.000113503 | 10 |
| hsa05134 | 5/69  | 57/8111  | 0.000114349 | 0.000361015 | 0.000137562 | 5  |
| hsa05135 | 7/69  | 137/8111 | 0.000151663 | 0.000472079 | 0.000179882 | 7  |
| hsa05231 | 6/69  | 98/8111  | 0.000173014 | 0.000531056 | 0.000202355 | 6  |
| hsa05146 | 6/69  | 102/8111 | 0.000215509 | 0.000652433 | 0.000248605 | 6  |
| hsa04660 | 6/69  | 104/8111 | 0.000239639 | 0.000715678 | 0.000272704 | 6  |
| hsa05143 | 4/69  | 37/8111  | 0.000256373 | 0.000755444 | 0.000287857 | 4  |
| hsa04928 | 6/69  | 106/8111 | 0.000265849 | 0.000773062 | 0.00029457  | 6  |
| hsa05211 | 5/69  | 69/8111  | 0.000283667 | 0.00081416  | 0.00031023  | 5  |
| hsa05415 | 8/69  | 203/8111 | 0.000302604 | 0.000849002 | 0.000323506 | 8  |
| hsa05230 | 5/69  | 70/8111  | 0.000303489 | 0.000849002 | 0.000323506 | 5  |
| hsa04921 | 7/69  | 154/8111 | 0.000312273 | 0.000853555 | 0.000325241 | 7  |
| hsa05203 | 8/69  | 204/8111 | 0.000312842 | 0.000853555 | 0.000325241 | 8  |
| hsa04137 | 5/69  | 72/8111  | 0.000346272 | 0.000933245 | 0.000355607 | 5  |
| hsa04217 | 7/69  | 159/8111 | 0.000379334 | 0.001010035 | 0.000384867 | 7  |
| hsa04670 | 6/69  | 114/8111 | 0.00039407  | 0.00103678  | 0.000395058 | 6  |
| hsa04630 | 7/69  | 162/8111 | 0.000424818 | 0.001104527 | 0.000420872 | 7  |
| hsa04071 | 6/69  | 119/8111 | 0.000495978 | 0.001259898 | 0.000480075 | 6  |
| hsa04722 | 6/69  | 119/8111 | 0.000495978 | 0.001259898 | 0.000480075 | 6  |
| hsa05022 | 12/69 | 476/8111 | 0.000596814 | 0.001498818 | 0.000571114 | 12 |
| hsa04610 | 5/69  | 85/8111  | 0.000745485 | 0.001851147 | 0.000705367 | 5  |
| hsa04371 | 6/69  | 138/8111 | 0.00108236  | 0.002657796 | 0.001012735 | 6  |
| hsa04510 | 7/69  | 201/8111 | 0.001519365 | 0.003689888 | 0.001406006 | 7  |



|          |       |          |             |             |             |    |
|----------|-------|----------|-------------|-------------|-------------|----|
| hsa05321 | 4/69  | 65/8111  | 0.002198096 | 0.005280208 | 0.002011987 | 4  |
| hsa05204 | 4/69  | 69/8111  | 0.002736193 | 0.006502137 | 0.002477594 | 4  |
| hsa04917 | 4/69  | 70/8111  | 0.00288363  | 0.006708234 | 0.002556126 | 4  |
| hsa05120 | 4/69  | 70/8111  | 0.00288363  | 0.006708234 | 0.002556126 | 4  |
| hsa05168 | 11/69 | 498/8111 | 0.002969283 | 0.006835538 | 0.002604635 | 11 |
| hsa04060 | 8/69  | 295/8111 | 0.003385651 | 0.007713701 | 0.002939252 | 8  |
| hsa04919 | 5/69  | 121/8111 | 0.003570712 | 0.008052321 | 0.003068281 | 5  |
| hsa03320 | 4/69  | 76/8111  | 0.003884023 | 0.008670394 | 0.003303794 | 4  |
| hsa04611 | 5/69  | 124/8111 | 0.003965804 | 0.008764427 | 0.003339624 | 5  |
| hsa04068 | 5/69  | 131/8111 | 0.005008253 | 0.010958652 | 0.004175719 | 5  |
| hsa04662 | 4/69  | 82/8111  | 0.005097209 | 0.011043953 | 0.004208222 | 4  |
| hsa05332 | 3/69  | 42/8111  | 0.005336094 | 0.011449288 | 0.004362672 | 3  |
| hsa04062 | 6/69  | 192/8111 | 0.00566264  | 0.012000772 | 0.004572811 | 6  |
| hsa04940 | 3/69  | 43/8111  | 0.005701724 | 0.012000772 | 0.004572811 | 3  |
| hsa04211 | 4/69  | 89/8111  | 0.006806775 | 0.014078954 | 0.005364688 | 4  |
| hsa04140 | 5/69  | 141/8111 | 0.006816507 | 0.014078954 | 0.005364688 | 5  |
| hsa04658 | 4/69  | 92/8111  | 0.007643018 | 0.01563988  | 0.005959468 | 4  |
| hsa04912 | 4/69  | 93/8111  | 0.007936148 | 0.016090722 | 0.006131259 | 4  |
| hsa04072 | 5/69  | 148/8111 | 0.008327181 | 0.016730063 | 0.006374875 | 5  |
| hsa04913 | 3/69  | 51/8111  | 0.009167864 | 0.018253134 | 0.006955231 | 3  |
| hsa04934 | 5/69  | 155/8111 | 0.010056678 | 0.019843981 | 0.007561412 | 5  |
| hsa04061 | 4/69  | 100/8111 | 0.010196901 | 0.019942611 | 0.007598994 | 4  |
| hsa04024 | 6/69  | 219/8111 | 0.010535432 | 0.020423951 | 0.007782406 | 6  |
| hsa05014 | 8/69  | 365/8111 | 0.011833003 | 0.022739944 | 0.008664899 | 8  |
| hsa04923 | 3/69  | 57/8111  | 0.012424149 | 0.023670146 | 0.009019346 | 3  |
| hsa05010 | 8/69  | 369/8111 | 0.012579527 | 0.023761328 | 0.00905409  | 8  |
| hsa04931 | 4/69  | 108/8111 | 0.01324978  | 0.024815267 | 0.009455686 | 4  |
| hsa04022 | 5/69  | 167/8111 | 0.013571468 | 0.025204155 | 0.009603869 | 5  |
| hsa04014 | 6/69  | 232/8111 | 0.01372053  | 0.025268643 | 0.009628442 | 6  |
| hsa05016 | 7/69  | 306/8111 | 0.014808347 | 0.027046651 | 0.01030594  | 7  |
| hsa04725 | 4/69  | 113/8111 | 0.015425257 | 0.027942474 | 0.010647287 | 4  |
| hsa05217 | 3/69  | 63/8111  | 0.0162647   | 0.029223567 | 0.011135439 | 3  |
| hsa04929 | 3/69  | 64/8111  | 0.016962505 | 0.030231562 | 0.011519528 | 3  |
| hsa04935 | 4/69  | 119/8111 | 0.018318544 | 0.032387187 | 0.012340914 | 4  |
| hsa04152 | 4/69  | 120/8111 | 0.018831406 | 0.032775424 | 0.012488849 | 4  |
| hsa05012 | 6/69  | 249/8111 | 0.018834746 | 0.032775424 | 0.012488849 | 6  |
| hsa05221 | 3/69  | 67/8111  | 0.019155653 | 0.033073432 | 0.012602403 | 3  |
| hsa04920 | 3/69  | 69/8111  | 0.02070112  | 0.035464709 | 0.013513583 | 3  |
| hsa04110 | 4/69  | 124/8111 | 0.020971967 | 0.035652343 | 0.01358508  | 4  |
| hsa04622 | 3/69  | 70/8111  | 0.021498918 | 0.036269167 | 0.013820116 | 3  |
| hsa04650 | 4/69  | 131/8111 | 0.025066702 | 0.041967737 | 0.015991517 | 4  |
| hsa00980 | 3/69  | 78/8111  | 0.028483313 | 0.04697621  | 0.017899961 | 3  |
| hsa04612 | 3/69  | 78/8111  | 0.028483313 | 0.04697621  | 0.017899961 | 3  |
| hsa04910 | 4/69  | 137/8111 | 0.028936666 | 0.047370394 | 0.018050162 | 4  |
| hsa04514 | 4/69  | 149/8111 | 0.037694319 | 0.061253269 | 0.023340136 | 4  |
| hsa04261 | 4/69  | 150/8111 | 0.03848599  | 0.062083239 | 0.02365639  | 4  |
| hsa05330 | 2/69  | 38/8111  | 0.041189592 | 0.065963042 | 0.025134762 | 2  |
| hsa04216 | 2/69  | 41/8111  | 0.047273171 | 0.075160941 | 0.028639558 | 2  |
| hsa04666 | 3/69  | 97/8111  | 0.049304313 | 0.077381386 | 0.029485644 | 3  |
| hsa00380 | 2/69  | 42/8111  | 0.049370025 | 0.077381386 | 0.029485644 | 2  |
